# Supplementary material for: Mediator Kinase Inhibition Impedes Transcriptional Plasticity and Prevents Resistance to ERK/MAPK-Targeted Therapy in KRAS-Mutant Cancers
Source: Research Square preprint supplement (doi:10.21203/rs.3.rs-3511242/v1), 2023-11-02
Supplement: Supplementary file 1 [file 05525fdeec5b48a344aa6fb1.xlsx]

## Sheet: Contents
Table	Contents
1	RPPA data for MIA PaCa-2 cells treated with DMSO (1:1,000) versus SCH772984 (1µM) for eight weeks
2	ChIP seq peak calling for MIA PaCa-2 cells cell treated with SCH77984 (1 µM) for 1 week or 8 weeks relative to DMSO (1:1,000)
3	All RNA-seq differential expression data for cell lines treated with SCH77984 (1 µM) for 1 week or 8 weeks relative to DMSO (1:1,000)
4	All GSEA data for cell lines treated with SCH77984 (1 µM) for 1 week or 8 weeks relative to DMSO (1:1,000
5	Transcriptional modifier drug screen
6	All RNA-seq differential expression data for MIA PaCa-2 cells treated with SCH77984 (1 µM) over a 5 week time course relative to DMSO (1:1,000)
7	All GSEA data for MIA PaCa-2 cells treated with SCH77984 (1 µM) over a 5 week time course relative to DMSO (1:1,000)
8	DPGP clusters
9	Selection of genes for loss-of-function screen
10	Loss-of-function screen results

## Sheet: Table 1-RPPA Data
Comparison	Condition	Time	Replicate	Number of Cells	Growth Rate	4EBP1 S65	4E-BP1 T70	AKT S473	AKT T308	A-Raf S299	c-Raf S338	CREB S133	EGFR Y1068	EGFR Y1148	EGFR Y1173	eIF4E S209	eIF4G S1108	Elk1 S383	eNOS/NOS III S116	ErbB2 Y1248	ERK T202/Y204	FKHR T24/FKHRL1 T32	FKHRL1-FOX03 S253	FOXO1 S256	GSK-3a/b S21/9	MDM2 S166	mTOR S2448	NF-kappaB p65 S536	p70S6 S371	p70S6 T389	p70S6 T412	p90RK T359/S363	p90RSK S380	PAK1 S199/204 PAK2 S192/197	PD-L1	PTEN	PTEN S380	S6 Rib Protein S235/236	S6 Rib Protein S240/244	Acetyl CoA Carboxylase S79	AMPKa T172	AMPKa1 S485	AMPKb1 S108	ATG5	ATG12	ATM S1981	Aurora A T288/B T232/C T198	B-Raf S445	c-Abl T735
	DMSO	1H	1	1500000	N/A	29143.9	27173.6	7030.41	16171.4	5120.46	16301.3	4984.06	5208.25	18471.8	9163.65	13174	3238.94	21184	8638.64	10219	13453.6	6700.92	21807.3	10992.8	11801.7	15537.3	21938.5	9452.18	20211.3	10551.3	17378.7	17518.3	2570.87	6310.69	19399.5	23861	23861	3152.65	12810.2	21247.6	26635.5	7540.17	4870.74	31257.1	16481.6	10905.3	20910.4	11373	17570.9
	DMSO	1H	2	1500000	N/A	27446.7	26635.5	3862.23	12964.9	1603.59	14764.8	5420.8	3572.42	18453.3	8544.14	9509.06	4442.62	30638.1	12469	11684.3	19870.7	9956.69	25848.3	15851.2	12519	16220	23861	7288.11	20333	10689.3	19950.3	17979.7	2751.77	9054.35	20994.2	28566.8	26635.5	4591.67	14661.8	25848.3	34891.6	10840	5276.4	32859.6	17361.3	12746.3	22925.4	11282.4	18620.2
	DMSO	1H	3	1500000	N/A	22697.3	22471.4	5292.26	15352	4092.86	19850.8	5802.25	4822.27	19791.3	9818.27	11418.6	4707.91	26635.5	11498.8	12481.5	12016.1	9255.75	24343	13849.4	11339	16187.6	25084.4	9274.28	19496.7	10394.2	18251.5	15599.6	2776.65	5089.83	17448.3	20150.8	20030.3	4315.64	13711.6	20150.8	31571.2	9877.35	5324.11	30333.2	15168.9	10927.1	20516.8	9386.24	18361.3
	SCH772984	1H	1	1500000	N/A	24343	28282.5	8176.34	14486.9	3442.66	19072.4	6647.53	5182.28	20110.6	9575.85	10056.8	4870.74	15898.8	10198.5	10614.8	786.034	9274.28	26903.2	12456.5	13808	14764.8	23155.8	8400.11	20910.4	9652.77	13808	13082.1	1326.1	8866.19	21226.4	30333.2	29143.9	4052.14	14115.1	22925.4	30031.4	9779.07	4779.06	32859.6	16415.8	9311.45	20516.8	12028.1	17961.7
	SCH772984	1H	2	1500000	N/A	16597.4	19890.5	6260.4	11248.6	1252.63	14545	4675.07	4812.64	21872.8	9255.75	6822.63	4793.42	19910.5	13095.2	12544	785.248	12028.1	30638.1	14750	10593.5	13946.7	20868.6	6607.76	24587.7	6355.02	9163.65	11430	1281.77	7562.82	20619.7	23861	23861	3619.17	12544	20557.9	30333.2	9749.78	4614.69	28282.5	13534.5	10872.6	18657.4	8621.38	15475.3
	SCH772984	1H	3	1500000	N/A	23623.6	30031.4	9117.95	17518.3	3633.68	17997.7	5334.76	5356.15	18657.4	9566.29	10732.2	5218.68	16058.6	10742.9	11660.9	680.617	10219	21850.9	13187.2	15063	13960.7	24343	8291.61	26370.5	8316.53	12733.6	9292.85	1551.54	7346.66	17535.8	21655.2	19555.3	3835.29	11533.4	25336.5	30333.2	10290.7	5177.1	33860.4	17137.1	11533.4	19283.4	12197.7	20994.2
Log2FC						-0.29637	0.0359381	0.541366	-0.0405988	-0.37708	0.0196495	0.039533	0.17442	0.0965215	0.0449856	-0.304571	0.264536	-0.597072	0.0619299	0.0181377	-4.33158	0.282632	0.141029	-0.010666	0.146264	-0.168082	-0.0521494	-0.159022	0.25941	-0.37911	-0.638443	-0.596019	-0.961416	0.217042	0.0379056	0.0635938	0.0410064	-0.0677642	-0.108783	0.0333585	-0.0376835	0.0776245	-0.0865038	0.0084162	-0.057787	-0.124608	-0.138606	0.0358182	-0.00320752
p-value						0.192481	0.862146	0.119375	0.850694	0.55636	0.914375	0.822321	0.324413	0.27284	0.489805	0.248931	0.152078	0.043333	0.759333	0.875141	0.00400873	0.217173	0.429351	0.952116	0.40836	0.0073826	0.573536	0.37355	0.072695	0.0643558	0.0141851	0.0119009	0.000241582	0.430843	0.754905	0.77501	0.850402	0.707914	0.340316	0.825246	0.755655	0.628538	0.244874	0.926227	0.640462	0.347992	0.100741	0.850181	0.981383
	DMSO	2H	1	1500000	N/A	29143.9	24834.8	3630.04	11452.9	4.53999e-05	14958	5907.63	4183.9	20557.9	8578.38	10239.4	4675.07	22925.4	10373.4	11719.4	13359.7	10076.9	24587.7	18807.3	17102.8	15275.4	23623.6	5687.35	21547.2	11579.6	18713.5	17659	2628.06	8883.94	21698.5	31257.1	30031.4	391.114	472.01	24587.7	32532.7	10775.2	4740.98	30333.2	17017.5	10198.5	23623.6	13752.8	19225.6
	DMSO	2H	2	1500000	N/A	26635.5	21226.4	2635.95	9643.12	821.392	13480.5	5192.65	4670.4	19930.4	8450.66	7816.56	5166.76	25591.1	12234.3	12990.8	12124.7	9480.57	26108.1	14764.8	11684.3	14385.8	21162.8	7288.11	21850.9	9710.86	16301.3	16481.6	2340.22	7398.26	19614	25591.1	25336.5	2933.64	10572.4	20353.3	26635.5	9720.58	4179.72	30333.2	13849.4	11159	21247.6	10435.8	16680.6
	DMSO	2H	3	1500000	N/A	30638.1	26635.5	4605.47	14185.9	3932.38	20455.3	7669.45	5177.1	21184	10678.6	13306.4	7266.28	26635.5	12644.8	12695.5	14256.9	10373.4	24343	17309.3	15930.6	16580.8	27173.6	8612.76	26108.1	13480.5	22471.4	13918.9	2881.31	6849.97	17747.5	27722.5	23861	3714.5	12332.6	25336.5	26108.1	10583	4755.23	34544.4	17344	11801.7	21960.5	13319.7	19072.4
	SCH772984	2H	1	1500000	N/A	26370.5	23861	4420.46	11226.1	971.654	15444.4	6081.46	5642.03	22697.3	10280.5	7918.84	5727.3	16155.2	10229.2	12493.9	622.66	10530.2	30946	16187.6	13213.6	15290.7	21742	5480.77	21247.6	9000.18	12644.8	11813.5	742.483	7016.36	20826.9	28566.8	27722.5	5024.09	15584	18361.3	26108.1	8433.78	3648.24	31257.1	17378.7	11036.9	19187.2	11626	19477.2
	SCH772984	2H	2	1500000	N/A	27173.6	24834.8	4345.95	11259.9	874.804	14414.6	5437.09	5292.26	18901.6	9367.49	7480.09	6393.26	18958.4	12136.8	12913.1	722.704	10883.5	25591.1	14443.5	11778.1	12913.1	22471.4	7361.36	26903.2	7871.47	11731.1	10657.3	1246.38	8111.19	20910.4	31257.1	28282.5	2892.86	9490.06	20578.5	24587.7	8168.17	3740.6	31571.2	14414.6	10147.7	19380.1	11316.3	16366.6
	SCH772984	2H	3	1500000	N/A	26370.5	24343	6496.38	14256.9	3718.22	18490.3	4904.95	4885.37	21205.2	9936.8	10127.4	5636.4	17326.6	9996.6	12028.1	650.018	10229.2	22471.4	12419.2	11025.9	11932.2	21247.6	8103.08	25084.4	9452.18	14443.5	9045.29	1348.84	6981.37	16932.7	23861	21894.7	1534.56	6451.06	18826.1	24100.8	7942.63	4113.38	30031.4	15475.3	10646.6	19302.7	11248.6	15882.9
Log2FC						-0.112865	0.00677384	0.489473	0.05854	0.227225	-0.0161575	-0.192646	0.173059	0.0262354	0.0945682	-0.297049	0.0537042	-0.519137	-0.123397	0.00113585	-4.3159	0.0802445	0.0743733	-0.241114	-0.312147	-0.204306	-0.136557	-0.043624	0.0753948	-0.401514	-0.566439	-0.608731	-1.23376	-0.065272	-0.00956154	-0.0151908	-0.0244082	0.425121	0.431414	-0.282845	-0.189173	-0.340522	-0.249728	-0.036074	-0.0284776	-0.0589679	-0.207716	-0.133599	-0.0879609
p-value						0.144662	0.947091	0.181275	0.783711	0.86729	0.944488	0.389365	0.173646	0.761675	0.461946	0.337569	0.807193	0.0052578	0.378501	0.98404	3.45486e-05	0.152538	0.629302	0.179313	0.176025	0.160566	0.290599	0.861314	0.606042	0.0763754	0.0339228	0.0156076	0.00351806	0.656852	0.94398	0.918798	0.880359	0.603337	0.584109	0.0693168	0.178926	0.00353964	0.0377158	0.624502	0.83486	0.452289	0.0133668	0.350651	0.480656
	DMSO	6H	1	1500000	N/A	38948.7	25591.1	4600.87	15138.6	2972.03	19477.2	7707.89	5502.73	23623.6	11920.3	12823.1	8699.32	27173.6	17623.7	13960.7	11048	9265.01	26108.1	20578.5	14429.1	17908	29143.9	9769.3	24343	13521	20868.6	12064.2	2210.56	6953.5	19225.6	26108.1	23861	3053.37	11510.3	23623.6	22697.3	9691.46	4944.34	32532.7	17765.3	11259.9	23861	13602.4	23155.8
	DMSO	6H	2	1500000	N/A	38177.4	23388.5	4272.69	12823.1	2344.91	18751	11282.4	6412.47	20952.2	11696	10657.3	9145.35	26635.5	16848.2	13413.3	9643.12	9386.24	28001.1	17413.5	15930.6	16350.3	25848.3	9966.65	25336.5	16399.4	27722.5	13226.8	2729.85	6829.46	18215	23388.5	22004.4	5866.42	17872.2	25591.1	26903.2	11070.1	4827.1	31888.5	15898.8	11896.5	22697.3	12835.9	21590.3
	DMSO	6H	3	1500000	N/A	35954.1	19614	4637.82	12759.1	2972.03	20010.3	8928.47	5049.28	19673	10178.2	9672.09	9045.29	23155.8	15630.8	11908.4	6781.81	8022.46	23155.8	14868.5	12632.1	14443.5	25336.5	8830.8	26108.1	14958	24834.8	12469	2470.07	6960.45	17240.2	23861	21226.4	4974.1	16252.5	23155.8	24834.8	11159	4619.31	31888.5	16301.3	12100.5	22004.4	11418.6	18324.6
	SCH772984	6H	1	1500000	N/A	37049.1	29436.8	5636.4	15048	2898.65	20994.2	7179.61	5161.59	22026.5	11373	12823.1	7339.31	20191.2	18882.7	13279.8	929.828	10992.8	26108.1	19053.4	14342.8	15882.9	27446.7	8830.8	28282.5	8569.8	12004.1	10147.7	1202.31	7669.45	19091.5	28282.5	26108.1	2344.91	9956.69	24343	25336.5	9585.44	4661.07	33189.9	19399.5	13134.5	21268.9	14898.3	22697.3
	SCH772984	6H	2	1500000	N/A	23155.8	21354.1	4822.27	14458	3800.93	20619.7	6647.53	5079.66	21916.6	11602.8	12258.8	6843.13	22026.5	15599.6	14545	794.728	9818.27	24587.7	16220	13042.9	11170.1	22247.8	8233.77	22026.5	8518.54	13346.4	9499.56	1156.32	7129.52	20110.6	4442.62	6069.31	3007.91	7847.89	19910.5	31571.2	9595.02	7472.61	37421.5	19015.3	14530.4	20211.3	10742.9	54720.8
	SCH772984	6H	3	1500000	N/A	35242.2	20292.4	4851.29	14228.5	4023.87	18196.8	6051.13	6587.97	20292.4	10927.1	9480.57	6063.24	18958.4	16580.8	12926.1	752.951	9471.1	24587.7	14632.5	10872.6	13016.9	23155.8	8291.61	27446.7	8795.54	12431.6	9595.02	1173.8	5978.95	16747.4	23155.8	22247.8	2201.73	8416.93	20578.5	25336.5	9108.83	4345.95	30031.4	14868.5	11125.6	21247.6	11181.3	19302.7
Log2FC						-0.244573	0.0514353	0.180295	0.103007	0.371505	0.0384302	-0.490044	-0.0115489	-0.000298426	0.00462205	0.0600892	-0.409453	-0.331234	0.0273897	0.052948	-3.47105	0.183053	-0.0374834	-0.0829794	-0.168293	-0.281453	-0.140979	-0.171999	0.0369868	-0.793967	-0.958586	-0.368804	-1.0689	0.00239837	0.03309	-0.392589	-0.301861	-0.879034	-0.799389	-0.158696	0.143927	-0.174227	0.195542	0.0634918	0.0927539	0.1378	-0.128318	-0.0399687	0.616856
p-value						0.257297	0.817813	0.108272	0.287691	0.114016	0.610435	0.0712189	0.946619	0.997428	0.953457	0.752342	0.00497915	0.0269927	0.791511	0.567225	0.00268243	0.130642	0.682067	0.663133	0.319886	0.165423	0.280295	0.0549641	0.762352	0.0016242	0.00421941	0.00200564	0.00100951	0.982756	0.731453	0.469177	0.532487	0.0712678	0.0322995	0.184412	0.340341	0.0732435	0.523959	0.538789	0.516842	0.312511	0.0392244	0.825507	0.379816
	DMSO	12H	1	1500000	N/A	56954	25591.1	2807.36	11944.2	3473.78	26108.1	39340.1	9956.69	22247.8	16399.4	11731.1	13711.6	26903.2	40945.6	16966.6	10127.4	8242.02	26108.1	24100.8	13835.6	22026.5	37049.1	8366.57	29143.9	25848.3	40134.9	10894.3	2359.02	6002.91	19129.8	28566.8	26108.1	9691.46	21504.1	33860.4	57526.4	15851.2	8086.9	34891.6	16949.6	13121.4	37049.1	16881.9	26370.5
	DMSO	12H	2	1500000	N/A	45706.7	18657.4	2872.68	10818.4	4455.97	24587.7	51534.2	12124.7	20475.8	17017.5	11271.1	14101	27173.6	38177.4	18416.5	10732.2	8425.34	26370.5	22925.4	12861.6	21311.5	36315.5	9000.18	30031.4	22925.4	36315.5	11591.2	2609.72	7208.39	19418.9	26108.1	24100.8	11660.9	20475.8	31571.2	53103.6	17188.6	8673.26	33860.4	14987.9	13413.3	37797.6	14271.2	25848.3
	DMSO	12H	3	1500000	N/A	58104.6	22925.4	4359.01	13821.8	5943.18	26903.2	38948.7	10614.8	18901.6	15367.3	11475.8	13863.3	25591.1	39340.1	15568.4	16797.7	7339.31	24343	22026.5	13548.1	19516.2	38948.7	8233.77	31571.2	23861	38177.4	12222.1	3184.34	7150.95	17925.9	28566.8	24343	8442.22	18124.1	35242.2	55826.3	17908	9828.09	35954.1	16747.4	13534.5	40134.9	15290.7	25591.1
	SCH772984	12H	1	1500000	N/A	48050.1	23155.8	2776.65	11316.3	1788.26	26370.5	27722.5	8103.08	22247.8	15398.1	15962.5	7186.79	22471.4	42616.6	16983.5	1079.23	8655.93	25848.3	22925.4	12040.1	16514.6	32859.6	7280.83	32859.6	11849	17747.5	7738.79	920.576	5034.15	18361.3	31571.2	29436.8	1815.29	6528.94	29436.8	55826.3	13725.4	6761.5	34200.6	15444.4	13253.3	36315.5	19206.4	26903.2
	SCH772984	12H	2	1500000	N/A	59874.1	28853.9	3367.75	12197.7	3850.66	25084.4	23155.8	15138.6	21396.9	20130.7	14443.5	6898.09	21982.5	41772.8	20231.6	890.693	8795.54	26635.5	21184	11849	15994.5	31571.2	7280.83	31888.5	11003.8	17396.1	8209.11	1381.6	5955.08	17908	31888.5	28566.8	1626.2	5854.7	29436.8	52575.2	14185.9	6574.81	35596.4	16498.1	12695.5	33523.4	17925.9	24343
	SCH772984	12H	3	1500000	N/A	58688.5	25591.1	4885.37	13808	4698.51	25336.5	18583	9604.63	20475.8	14972.9	14501.4	6335.98	20826.9	35954.1	14868.5	1180.86	7982.44	25591.1	19418.9	11533.4	14157.5	29143.9	7510.07	32209	11226.1	17694.3	8973.22	1418	7302.7	17068.7	30946	26370.5	1448.09	5491.74	27722.5	48050.1	13266.5	7058.59	37049.1	18453.3	12431.6	33189.9	15946.6	23388.5
Log2FC						0.0515429	0.20817	0.13578	0.0287984	-0.424396	-0.0150932	-0.902265	0.00660852	0.0572652	0.0499164	0.381275	-1.02917	-0.287339	0.0227204	0.0317064	-3.57915	0.0833181	0.0233467	-0.120299	-0.184152	-0.429617	-0.263339	-0.213974	0.0955041	-1.09178	-1.11731	-0.477884	-1.13197	-0.154689	-0.0824374	0.181568	0.178554	-2.60727	-1.74949	-0.217315	-0.0894274	-0.307152	-0.38258	0.0291902	0.0498278	-0.0621249	-0.158355	0.192649	-0.0601062
p-value						0.73898	0.253504	0.703317	0.839786	0.353353	0.74892	0.0147982	0.983199	0.489286	0.756186	0.0025015	1.33456e-05	0.00225546	0.793746	0.840979	0.00570651	0.319751	0.587835	0.19274	0.00774039	0.00642961	0.00964064	0.00908117	0.0536483	0.000138565	4.93074e-05	0.00343198	0.0071847	0.419043	0.152987	0.0126278	0.0420095	0.000917985	0.000176055	0.0180372	0.268393	0.00778391	0.0176715	0.523076	0.625222	0.10677	0.0426964	0.142822	0.380211
	DMSO	24H	1	2000000	N/A	30946	10425.4	3491.2	12900.2	4429.31	25336.5	26370.5	10006.6	20743.7	16252.5	10593.5	15506.3	30638.1	31257.1	17729.8	3785.75	7354	26903.2	36680.5	12149	24343	57526.4	9614.23	24343	12444.1	20496.3	13821.8	2673.12	9828.09	19187.2	24100.8	19910.5	12185.5	14486.9	24100.8	43044.9	18527.3	8786.75	30333.2	14913.2	16220	40134.9	8973.22	30333.2
	DMSO	24H	2	2000000	N/A	58688.5	17188.6	3893.25	13849.4	4774.29	21763.7	29143.9	10796.7	17943.8	13946.7	10311.3	14271.2	22697.3	31888.5	14735.3	3576	7023.38	24587.7	19283.4	11789.9	18508.8	35596.4	7623.57	28001.1	11719.4	20557.9	13494	2913.18	6714.34	18196.8	22925.4	19751.8	9172.82	17292	26635.5	36315.5	17344	6568.23	28566.8	15184	12733.6	23861	10530.2	21982.5
	DMSO	24H	3	2000000	N/A	66171.2	21611.9	3558.16	12951.9	5166.76	20806.1	20952.2	13629.6	18379.7	16814.5	10807.5	13440.1	22925.4	37421.5	16781	4332.93	6781.81	24834.8	22026.5	14898.3	18732.2	36315.5	7101.06	34544.4	3952.09	7754.28	13108.3	3797.13	6620.99	18069.8	28566.8	20931.3	8054.61	15306	25848.3	27722.5	15756.4	5574.74	31257.1	18434.9	12823.1	23623.6	12394.4	22925.4
	SCH772984	24H	1	2000000	N/A	25848.3	14824	3707.08	12028.1	4736.25	25084.4	14501.4	10636	19034.3	14559.5	17396.1	2558.05	18788.5	24587.7	16171.4	1409.51	10519.6	24100.8	22697.3	10446.3	11742.9	34544.4	8094.98	28566.8	3115.05	5019.07	9009.19	1758.12	7273.55	18379.7	34200.6	26635.5	610.941	1786.48	27446.7	32209	13904.9	8275.05	36315.5	17500.8	15214.4	18324.6	17188.6	23155.8
	SCH772984	24H	2	2000000	N/A	31257.1	19034.3	4350.3	15093.2	5286.97	25848.3	10342.3	10127.4	20130.7	15306	20578.5	2936.58	18732.2	25591.1	16547.7	1237.69	12076.3	23861	22247.8	9081.55	11649.3	32859.6	7193.98	32532.7	3310.98	5619.51	9209.59	2002.2	8070.74	18601.6	38561.1	32209	629.547	1751.1	29143.9	31571.2	13042.9	7354	37049.1	17694.3	15048	17854.3	20191.2	22925.4
	SCH772984	24H	3	2000000	N/A	23388.5	13725.4	3854.51	14515.9	6483.4	23861	14794.3	14171.7	20557.9	17017.5	18324.6	2784.99	19110.6	27446.7	18769.7	1117.67	11556.5	24343	22247.8	8374.95	12258.8	34544.4	8383.33	26635.5	3515.72	5324.11	9691.46	1629.45	7302.7	19187.2	31257.1	24587.7	721.982	1879.95	22925.4	34200.6	12481.5	5972.97	33860.4	15599.6	15184	16680.6	13561.6	22471.4
Log2FC						-0.952798	-0.0489506	0.122446	0.0686761	0.199949	0.139371	-0.947942	0.0208857	0.0656222	-0.00401609	0.828064	-2.38398	-0.42934	-0.373556	0.0642519	-1.63518	0.690702	-0.0780757	-0.214986	-0.47703	-0.788616	-0.344427	-0.0400627	0.0139864	-1.4998	-1.61243	-0.53442	-0.79989	-0.0325284	0.0184721	0.460521	0.461439	-3.90571	-3.11956	0.05419	-0.128158	-0.388874	0.0456132	0.250128	0.0657393	0.121472	-0.729088	0.675381	-0.134309
p-value						0.0838825	0.887522	0.234304	0.549968	0.270953	0.199449	0.0118686	0.9255	0.417902	0.971344	0.00101573	4.44132e-05	0.0664373	0.0229447	0.566777	0.0003926	0.000881148	0.147312	0.541726	0.0343027	0.0107647	0.272926	0.805643	0.938785	0.0899249	0.0620189	0.00013389	0.0206532	0.8817	0.607131	0.0255735	0.0299363	0.00176546	7.6049e-05	0.650927	0.537486	0.0108063	0.856399	0.0102917	0.596743	0.346908	0.102275	0.0422495	0.447233
	DMSO	3D	1	6000000	N/A	50011.1	27173.6	2844.09	11614.4	4698.51	25084.4	15063	7762.03	16915.7	12481.5	12581.7	11707.7	22925.4	27446.7	12990.8	3473.78	7324.65	25591.1	20333	10404.6	16697.3	26635.5	7288.11	31257.1	5024.09	9136.2	11192.5	3446.11	6509.38	16285	25084.4	20557.9	2368.47	8433.78	39340.1	48533	16432.2	4944.34	34200.6	18732.2	11660.9	19811.1	11968.1	20868.6
	DMSO	3D	2	6000000	N/A	59278.4	30946	3206.71	12506.5	5049.28	23623.6	16465.1	8982.2	17361.3	13440.1	11591.2	11872.7	22026.5	25336.5	13629.6	3381.25	7405.66	25336.5	20030.3	9986.6	16614	26370.5	6418.89	29436.8	5574.74	10775.2	11070.1	3751.83	6946.55	16268.7	25591.1	20681.6	2975	10016.6	38177.4	50513.7	17483.3	4865.86	34544.4	17979.7	11418.6	20272.1	12149	19751.8
	DMSO	3D	3	6000000	N/A	42192.6	20191.2	2821.43	12594.3	4969.13	21268.9	24834.8	13575.2	19168	17188.6	10280.5	12004.1	23155.8	25336.5	16848.2	2977.98	7016.36	27446.7	21676.9	9556.72	16187.6	31257.1	7016.36	26370.5	3823.8	6687.53	11237.4	2790.57	6483.4	15851.2	18958.4	15199.2	4268.43	11649.3	28001.1	33860.4	15352	5223.9	26370.5	14720.6	12161.1	20050.3	8501.52	24100.8
	SCH772984	3D	1	3000000	N/A	12632.1	16366.6	7465.15	16268.7	6843.13	33189.9	18977.3	28566.8	22471.4	25336.5	17292	1874.32	19870.7	13467	27173.6	56387.3	25591.1	25084.4	22247.8	16481.6	12939	40945.6	8168.17	45251.9	6210.52	11837.2	9643.12	3533.34	8769.2	17872.2	42616.6	33860.4	818.112	2812.98	31888.5	47098.7	20578.5	7108.17	37049.1	16814.5	16747.4	23388.5	20764.5	23861
	SCH772984	3D	2	3000000	N/A	13946.7	17836.5	7259.02	15851.2	6674.17	32859.6	12531.5	16481.6	21290.1	18527.3	18178.6	1994.2	19034.3	12149	19360.7	56954	26370.5	25336.5	21938.5	15444.4	12481.5	40134.9	7136.66	47572	5591.48	10046.7	9348.77	3165.29	8358.21	17729.8	44801.6	35242.2	794.728	2628.06	27173.6	37049.1	17659	6700.92	35242.2	16531.1	14101	21375.5	20952.2	21015.2
	SCH772984	3D	3	3000000	N/A	12695.5	16614	7390.86	15199.2	5250.09	32532.7	13213.6	14299.8	21547.2	17171.4	19148.9	2034.49	18996.3	13121.4	17872.2	56387.3	25848.3	24100.8	22247.8	18342.9	12670.1	42616.6	7457.68	46166	8103.08	14898.3	9274.28	3442.66	7707.89	18269.7	43914.5	33860.4	913.241	3050.31	30031.4	42192.6	20312.7	6946.55	37421.5	18379.7	18033.7	23155.8	21036.2	24100.8
Log2FC						-1.94749	-0.623897	1.31766	0.366048	0.350753	0.49445	-0.33375	0.968961	0.289218	0.501613	0.664772	-2.59172	-0.23422	-1.01196	0.567229	4.10945	1.83916	-0.0727202	0.0987254	0.747213	-0.377962	0.55384	0.135402	0.674828	0.464803	0.467639	-0.245083	0.0219014	0.316775	0.154373	0.915367	0.867368	-1.92792	-1.82568	-0.244106	-0.0731021	0.249036	0.465264	0.20598	0.00819089	0.472066	0.175662	0.943988	0.0918766
p-value						0.00165232	0.0450491	5.79477e-06	0.00131893	0.0590854	0.00107137	0.350274	0.112771	0.00701591	0.108928	0.0014168	5.84597e-08	0.00160404	8.33732e-05	0.0890493	2.57489e-09	2.18158e-07	0.168273	0.0470418	0.00154957	5.0918e-05	0.00166933	0.163252	0.000391963	0.116594	0.140197	0.000144399	0.87524	0.0089685	0.00106369	0.000760103	0.0011425	0.0136214	0.00153595	0.228441	0.73373	0.0502987	0.00028861	0.15186	0.946176	0.0181544	0.0161886	0.00107733	0.435277
	DMSO	5D	1	6000000	N/A	27173.6	17747.5	3229.23	12040.1	6285.5	18490.3	25084.4	16983.5	18178.6	15709.2	9358.12	3367.75	18398	16236.2	19034.3	3862.23	8014.44	22925.4	17659	16465.1	10593.5	17396.1	6291.78	23861	3022.98	6627.61	9528.09	4411.63	6179.55	19015.3	17588.5	17943.8	185.861	128.252	41357.1	31257.1	14943	7065.65	31888.5	14943	10753.6	15444.4	9857.62	16915.7
	DMSO	5D	2	6000000	N/A	20414.5	11361.7	2622.81	11441.5	6335.98	18939.4	48050.1	16058.6	18051.8	15851.2	9136.2	4217.51	22471.4	16865.1	19574.8	3967.93	8830.8	23623.6	16983.5	12112.6	9837.93	18416.5	6272.94	20516.8	2586.34	4885.37	9720.58	3035.1	5854.7	19614	11048	12531.5	192.289	114.549	30638.1	21205.2	15123.4	7158.1	25848.3	14044.7	9907.03	15184	7016.36	19457.7
	DMSO	5D	3	6000000	N/A	17712	11498.8	2370.84	13121.4	6457.51	18160.4	33860.4	12581.7	19910.5	13697.9	7420.49	2980.96	22247.8	14779.6	16714	3626.42	8006.43	23623.6	14809.1	11932.2	9461.63	18251.5	5925.38	22247.8	2173.3	4167.2	11992.1	2625.43	7295.41	19673	9585.44	12258.8	203.772	148.71	29143.9	16915.7	14898.3	6627.61	25084.4	13386.5	9528.09	14794.3	6822.63	17051.6
	SCH772984	5D	1	750000	N/A	7251.76	5625.14	7044.48	14129.2	7472.61	28566.8	22247.8	16781	20785.3	16580.8	12088.4	2377.96	21057.2	12149	26635.5	28001.1	22004.4	22925.4	23388.5	10561.8	10456.7	32209	6925.74	24587.7	6130.3	9200.38	8786.75	1768.7	9228.02	16580.8	24343	22247.8	462.201	1065.29	20660.9	28853.9	16531.1	7918.84	33189.9	14705.8	12444.1	19225.6	11849	22925.4
	SCH772984	5D	2	750000	N/A	6687.53	5286.97	5761.77	15290.7	8459.12	29732.6	30946	23388.5	23623.6	20130.7	11181.3	2530.06	20496.3	9936.8	30333.2	20994.2	22026.5	23623.6	18142.3	6087.54	8630	34891.6	7517.58	25084.4	10332	15153.7	9452.18	1448.09	9237.25	17943.8	22471.4	21268.9	487.846	1019.43	21829.1	46166	16848.2	7700.19	31888.5	13253.3	12149	18713.5	12481.5	22925.4
	SCH772984	5D	3	750000	N/A	4984.06	4088.77	4150.57	14794.3	9976.63	22471.4	13226.8	10208.7	23388.5	12632.1	11259.9	2477.49	21763.7	10056.8	23155.8	24587.7	20211.3	23388.5	15048	4464.89	8200.91	29143.9	6981.37	18863.8	7646.48	10572.4	11092.2	857.482	8751.67	19594.4	15048	17120	482.992	985.353	17623.7	26635.5	11568	8391.71	32532.7	15048	12481.5	17257.5	10850.9	23623.6
Log2FC						-1.78692	-1.43672	1.04415	0.27255	0.441432	0.539007	-0.687837	0.143012	0.272179	0.124681	0.414055	-0.516688	0.00456334	-0.574965	0.534361	2.6832	1.37018	-0.00484039	0.194242	-0.94006	-0.131565	0.832034	0.212521	0.0407809	1.63123	1.15538	-0.0909941	-1.30576	0.493689	-0.107417	0.694666	0.504803	1.30018	2.97115	-0.750574	0.551138	-0.000556698	0.203538	0.237045	0.0213889	0.296416	0.281164	0.57013	0.378962
p-value						0.00592676	0.0167188	0.0291908	0.0130644	0.0355852	0.0206615	0.183582	0.714446	0.0234384	0.581625	0.0132811	0.0449362	0.963582	0.00519708	0.0213234	0.000515748	3.78158e-05	0.813051	0.409527	0.0512718	0.321062	0.00114105	0.0118413	0.788238	0.0122131	0.0298577	0.575898	0.0294312	0.00481497	0.194728	0.103903	0.0698921	7.33155e-06	3.78483e-06	0.027774	0.224482	0.997465	0.0157818	0.0869976	0.781586	0.00368816	0.00624301	0.0246072	0.00336785
	DMSO	1W	1	6.39091e+06	1	17240.2	15867.1	3640.95	11920.3	4969.13	19574.8	11908.4	9779.07	19360.7	12977.9	10509.1	2784.99	20681.6	14764.8	14101	6310.69	8681.94	23861	15693.5	6489.88	9614.23	15662.1	8664.59	22697.3	4072.45	7324.65	11626	3209.92	6014.93	15882.9	18215	18508.8	237.936	275.614	37421.5	50011.1	11339	5860.56	33860.4	16139.1	10916.2	16448.7	8839.63	17854.3
	DMSO	1W	2	6.05682e+06	1	16236.2	15367.3	2872.68	11614.4	5756.01	19399.5	11170.1	12004.1	18160.4	14559.5	10394.2	2921.93	19516.2	14824	14898.3	5059.39	8937.4	24343	17188.6	6974.39	10026.6	16663.9	8094.98	21829.1	3508.7	7266.28	11860.9	4027.9	6727.78	15521.8	18807.3	18269.7	266.134	305.21	37049.1	54176.3	13121.4	5937.24	32209	14794.3	11259.9	16399.4	8734.18	18288
	DMSO	1W	3	6.18864e+06	1	15552.9	15108.3	3013.93	11626	4359.01	18142.3	11170.1	11944.2	20599	14617.9	9614.23	2757.28	23861	17854.3	14676.5	4568.77	8493.02	23388.5	16203.8	7158.1	11114.4	18306.3	7793.15	19771.6	3374.49	6496.38	12913.1	4007.81	6721.05	16881.9	18920.5	19990.2	246.904	273.418	34891.6	51021.4	13849.4	7158.1	30638.1	16983.5	11452.9	16597.4	8875.05	18471.8
	SCH772984	1W	1	477679	0.134279	8937.4	7280.83	10229.2	15615.2	7150.95	28001.1	11147.8	16268.7	23155.8	16580.8	12016.1	3127.53	20496.3	10168	19302.7	28566.8	18920.5	23155.8	18807.3	12887.3	9191.19	29143.9	9283.55	25591.1	15615.2	24343	9837.93	1410.92	9769.3	17085.8	30031.4	27722.5	747.699	2514.93	23155.8	48050.1	16630.6	6680.85	37421.5	16317.6	10840	19673	13480.5	21141.6
	SCH772984	1W	2	520089	0.15192	8209.11	6700.92	10775.2	14086.9	5404.57	25848.3	7502.57	14838.8	23623.6	15787.9	10938	2887.08	17694.3	8433.78	17872.2	29143.9	17448.3	22247.8	16415.8	11649.3	8266.78	26108.1	7376.1	23388.5	13359.7	21015.2	8638.64	1253.88	5530.31	16415.8	28001.1	25336.5	575.362	1543.8	19399.5	40538.2	14256.9	6317	32532.7	13306.4	11259.9	18233.2	11837.2	23623.6
	SCH772984	1W	3	486607	0.138119	7738.79	6045.08	9633.49	15459.8	6640.88	25591.1	6045.08	13561.6	23861	15898.8	11487.3	2784.99	20826.9	8493.02	17729.8	29143.9	22697.3	21633.5	16268.7	10796.7	8425.34	27446.7	8006.43	21504.1	13095.2	20599	10872.6	1232.75	8442.22	19477.2	26370.5	25591.1	937.297	2387.49	19206.4	43914.5	13575.2	6802.19	33523.4	26635.5	13399.9	17854.3	10259.9	21525.6
Log2FC						-0.978351	-1.21041	1.68514	0.361143	0.347802	0.475966	-0.471803	0.405361	0.281453	0.19534	0.174507	0.0560644	-0.118253	-0.808181	0.330097	2.44605	1.1776	-0.0948475	0.069037	0.77682	-0.248813	0.707805	0.00664521	0.132517	1.94112	1.64516	-0.31062	-1.52872	0.286641	0.13379	0.593344	0.470351	1.58972	2.91574	-0.82433	-0.228188	0.214883	0.0628564	0.0976195	0.231559	0.0781054	0.173405	0.427763	0.279536
p-value						0.000180331	3.12662e-05	6.47252e-05	0.00254833	0.10545	0.00110616	0.10706	0.0271382	0.00472059	0.0262058	0.0355682	0.380681	0.362137	0.00437241	0.00253011	1.79197e-06	0.0021881	0.0434785	0.438235	0.00154854	0.0376617	0.000792961	0.954071	0.232148	0.000233343	0.000249723	0.0360738	0.000880419	0.325678	0.197938	0.000930543	0.00141801	0.00865775	0.00362335	0.000461539	0.0392654	0.159603	0.561421	0.268657	0.533487	0.483317	0.0194675	0.0308073	0.00798715
	DMSO	2W	1	5.92727e+06	1	37797.6	13877.2	4092.86	12088.4	5907.63	18958.4	6967.42	7108.17	16630.6	11048	9237.25	10198.5	19692.6	20764.5	12682.8	3526.29	5636.4	22697.3	15063	10147.7	16187.6	25336.5	6374.11	22925.4	10036.7	16498.1	12695.5	1904.55	6502.88	17188.6	21504.1	18398	5318.79	11533.4	15153.7	23388.5	9808.45	5292.26	28853.9	16547.7	10959.9	16285	8795.54	19418.9
	DMSO	2W	2	6.32273e+06	1	21872.8	7442.78	3912.77	11159	3666.53	18160.4	4712.62	6118.06	16647.2	10498.6	8408.51	9490.06	21720.2	16647.2	14086.9	2975	4637.82	20931.3	13160.8	7638.83	13386.5	23623.6	7072.72	15851.2	8621.38	14115.1	12064.2	1233.98	7093.96	18527.3	13480.5	12990.8	6463.98	13602.4	9311.45	23155.8	8242.02	5819.67	25336.5	14115.1	11591.2	17500.8	5502.73	21504.1
	DMSO	2W	3	6.27273e+06	1	29732.6	9604.63	3916.68	10394.2	2607.12	17588.5	4385.24	5074.58	17120	10710.7	7654.12	7950.58	19091.5	17188.6	13821.8	2998.9	4514.28	20010.3	12797.4	8391.71	13918.9	20312.7	6891.2	19091.5	10593.5	17378.7	10026.6	1359.67	3648.24	17034.6	17344	16139.1	4225.95	10519.6	11956.1	25084.4	9036.26	4764.75	25848.3	12771.9	11475.8	18657.4	7093.96	19302.7
	SCH772984	2W	1	195800	0.139532	6904.99	4703.21	15290.7	17623.7	6142.58	20660.9	3897.15	5563.59	21547.2	10290.7	8022.46	3572.42	21807.3	6247.89	13440.1	38948.7	14285.5	20764.5	16301.3	11305	9054.35	27446.7	7317.32	16123	12185.5	18958.4	9499.56	887.138	6444.61	17872.2	19034.3	20516.8	2340.22	7072.72	16139.1	35596.4	11014.9	6361.38	34544.4	14928.1	11259.9	18124.1	7800.94	20660.9
	SCH772984	2W	2	151000	0.0855792	6075.38	4929.54	19791.3	18306.3	4964.16	19890.5	3963.96	5508.24	21418.3	10321.7	8946.34	3800.93	17430.9	5546.93	13780.4	52575.2	16026.5	20191.2	16848.2	14809.1	9547.17	25336.5	8192.71	17257.5	14185.9	22026.5	9779.07	727.781	6788.6	19751.8	21015.2	23623.6	2034.49	6130.3	17430.9	42192.6	12913.1	5913.54	38948.7	18471.8	11920.3	21311.5	7990.43	21268.9
	SCH772984	2W	3	167400	0.10699	9191.19	6154.88	17137.1	15709.2	2689.2	19950.3	4875.61	7785.36	23861	13069	10732.2	4793.42	18657.4	6960.45	16268.7	51021.4	18996.3	21829.1	22471.4	17518.3	11766.4	30031.4	6647.53	23388.5	19148.9	29143.9	9662.42	848.101	4817.45	18788.5	28282.5	28566.8	2924.85	7065.65	21184	43914.5	13780.4	6741.25	37797.6	15962.5	10311.3	21141.6	10710.7	22247.8
Log2FC						-2.01161	-0.96996	2.13091	0.618223	0.179579	0.145245	-0.334953	0.0432071	0.407058	0.0623274	0.130805	-1.18377	-0.063586	-1.54161	0.0994817	3.90732	1.73736	-0.0194921	0.439255	0.737033	-0.518235	0.257598	0.123619	-0.0276667	0.637993	0.547215	-0.265403	-0.86892	0.065867	0.0968313	0.384963	0.61332	-1.13298	-0.814869	0.588182	0.764761	0.477298	0.260317	0.475563	0.184568	-0.0228809	0.20802	0.309019	0.0916925
p-value						0.00879041	0.060291	0.000506305	0.00284199	0.721134	0.0145276	0.271646	0.855105	0.00249283	0.638292	0.432195	0.00248693	0.599447	0.000911682	0.384544	0.000503315	0.00126209	0.773134	0.080708	0.0403508	0.0216882	0.0874401	0.286766	0.91003	0.0653251	0.0804737	0.0737652	0.0325764	0.837255	0.165482	0.216955	0.0408893	0.0140818	0.0059059	0.0543823	0.00305536	0.0192208	0.0539593	0.00371539	0.264991	0.741951	0.0943032	0.271642	0.196801
	DMSO	3W	1	6.17727e+06	1	10970.9	12016.1	1402.48	10981.9	3952.09	15693.5	10916.2	5281.68	18694.8	10404.6	10678.6	1921.77	19438.3	15740.6	12419.2	2303.07	9442.72	24587.7	16383	5878.16	9292.85	25336.5	6241.65	26635.5	1233.98	2552.94	10178.2	2411.49	6198.11	17017.5	19264.1	8875.05	260.083	326.36	25084.4	15709.2	11498.8	5218.68	30946	15521.8	11114.4	14072.8	6925.74	19129.8
	DMSO	3W	2	5.87727e+06	1	12064.2	10905.3	1970.42	10732.2	3115.05	16252.5	17961.7	5497.23	18958.4	10959.9	13253.3	2841.25	23623.6	15882.9	14987.9	4117.49	10583	25591.1	16187.6	8054.61	11081.1	23623.6	6118.06	29436.8	1423.68	3979.85	10742.9	3487.71	7136.66	19283.4	17712	12394.4	279.499	227.921	23388.5	14868.5	15615.2	4783.84	32859.6	15306	10981.9	15709.2	7237.28	21504.1
	DMSO	3W	3	6.00682e+06	1	18583	18069.8	3320.93	9857.62	1008.28	20251.8	9956.69	7368.72	36680.5	12771.9	15819.5	4044.04	24834.8	14720.6	16187.6	5382.99	9956.69	28566.8	16915.7	15093.2	11136.7	18434.9	3827.63	30638.1	2206.14	6093.64	10342.3	5187.46	5064.44	15428.9	27722.5	25336.5	208.304	100.585	36680.5	25591.1	16848.2	4285.53	37797.6	18051.8	8901.72	15740.6	12493.9	19950.3
	SCH772984	3W	1	1416000	0.599834	29436.8	12569.1	8839.63	13988.6	3519.24	27173.6	4954.25	5034.15	20333	10905.3	17085.8	5064.44	20030.3	14400.2	11568	16042.5	10807.5	23155.8	19732.1	22247.8	16106.9	30031.4	7376.1	30031.4	6457.51	9009.19	11908.4	1690.87	8258.51	16106.9	27722.5	24834.8	586.399	2059.05	23155.8	25591.1	12369.6	5292.26	35596.4	16597.4	10270.2	16432.2	14661.8	19712.3
	SCH772984	3W	2	1.26e+06	0.575469	29143.9	10829.2	9490.06	13821.8	2092.26	25084.4	4703.21	6627.61	22026.5	12506.5	14385.8	6260.4	21205.2	15819.5	13319.7	25848.3	11203.7	24587.7	20171	18251.5	17712	27446.7	7368.72	25848.3	9367.49	13904.9	11147.8	1553.09	7108.17	17034.6	22925.4	22925.4	719.819	2261.99	15078.1	27446.7	9808.45	4605.47	30031.4	14898.3	8664.59	16697.3	10981.9	17137.1
	SCH772984	3W	3	2.028e+06	0.674817	38948.7	15108.3	4984.06	11395.8	1199.91	26635.5	5687.35	5591.48	22026.5	11956.1	17641.3	7222.82	21829.1	18657.4	13108.3	11226.1	10342.3	23623.6	21611.9	23388.5	20537.3	28001.1	4939.4	33860.4	9145.35	13359.7	12332.6	1711.29	6502.88	16647.2	24587.7	23623.6	2768.33	6581.38	28001.1	36315.5	12771.9	5480.77	35596.4	17223	10219	19751.8	18106	22925.4
Log2FC						1.22863	-0.0902061	1.80028	0.312452	-0.245583	0.595917	-1.33959	-0.0729141	-0.20727	0.0511295	0.305097	1.0745	-0.10651	0.0767753	-0.198306	2.16995	0.109811	-0.141941	0.313906	1.1382	0.786605	0.342935	0.282174	0.0495484	2.36006	1.52248	0.17882	-1.1618	0.24928	-0.0551799	0.217678	0.615081	2.44575	4.05731	-0.362469	0.669752	-0.330974	0.106105	-0.00539133	-0.0047578	-0.0884946	0.216174	0.71476	-0.019404
p-value						0.00961383	0.761582	0.0217312	0.0481472	0.722598	0.00473553	0.0368754	0.731672	0.608691	0.656319	0.156691	0.0207144	0.401496	0.552563	0.207079	0.0350482	0.128256	0.124198	0.00273973	0.0218497	0.00597856	0.0531469	0.360051	0.71747	0.002404	0.0132718	0.0233423	0.0650449	0.21694	0.603793	0.361685	0.176324	0.191576	0.0816817	0.325088	0.0814535	0.182452	0.391511	0.965663	0.964166	0.527441	0.110234	0.105869	0.888921
	DMSO	4W	1	6.16136e+06	1	10157.8	10668	2594.11	11754.6	7816.56	17137.1	18939.4	16881.9	18601.6	16547.7	9045.29	2264.25	19380.1	12682.8	19457.7	6039.04	10198.5	24100.8	15138.6	9509.06	10646.6	22004.4	7129.52	21916.6	3816.16	6399.66	10786	3232.47	9547.17	19496.7	13835.6	16366.6	357.452	591.109	31571.2	31257.1	11932.2	10721.4	29436.8	13988.6	10775.2	14472.4	6981.37	18844.9
	DMSO	4W	2	6.31818e+06	1	10239.4	12028.1	2578.6	11626	4324.27	19614	46166	24100.8	19831	22925.4	8786.75	2552.94	21763.7	14617.9	23861	5120.46	9877.35	26635.5	17240.2	12784.6	15199.2	23861	5750.26	20973.2	4007.81	7903.02	10561.8	4345.95	8192.71	20681.6	14853.6	17309.3	425.813	735.831	33523.4	48050.1	16203.8	9691.46	31257.1	14838.8	10583	17102.8	7420.49	22026.5
	DMSO	4W	3	6.29091e+06	1	14764.8	14200	1642.54	8552.68	2927.78	17997.7	25591.1	19302.7	19418.9	19732.1	7754.28	2472.54	19438.3	13877.2	22247.8	4442.62	8813.14	24834.8	16268.7	13042.9	14720.6	21698.5	5558.04	22697.3	4259.9	8742.93	9566.29	4289.82	3013.93	18434.9	17051.6	19850.8	411.99	905.059	39340.1	53637.3	18751	8111.19	33523.4	14044.7	9877.35	19015.3	9218.8	22697.3
	SCH772984	4W	1	1.12773e+06	0.750988	4919.69	3317.61	2106.96	8760.43	2913.18	16932.7	6620.99	3388.02	15740.6	7769.8	9081.55	281.463	15803.7	12900.2	25084.4	1576.56	6707.62	14385.8	3785.75	5597.08	4315.64	8760.43	3630.04	4994.04	610.941	874.804	7259.02	378.797	5872.29	13988.6	723.427	1824.39	132.688	72.9665	512.346	14486.9	5244.84	2445.49	9292.85	4367.74	9218.8	10927.1	985.353	14824
	SCH772984	4W	2	1.47955e+06	0.807214	6039.04	4027.9	1694.26	8400.11	3284.6	16663.9	8883.94	3920.6	17518.3	8982.2	12124.7	1416.58	19438.3	14185.9	29732.6	1015.36	5733.03	15184	5064.44	4411.63	6574.81	7442.78	3877.71	7230.04	682.662	936.36	6555.11	411.579	3751.83	14928.1	972.626	2293.88	135.233	71.9521	646.13	13835.6	6179.55	2428.43	16432.2	5984.93	8578.38	11361.7	1826.21	17085.8
	SCH772984	4W	3	1.84227e+06	0.852617	NO DATA	NO DATA	NO DATA	NO DATA	NO DATA	NO DATA	NO DATA	NO DATA	NO DATA	NO DATA	NO DATA	NO DATA	NO DATA	NO DATA	NO DATA	NO DATA	NO DATA	NO DATA	NO DATA	NO DATA	NO DATA	NO DATA	NO DATA	NO DATA	NO DATA	NO DATA	NO DATA	NO DATA	NO DATA	NO DATA	NO DATA	NO DATA	NO DATA	NO DATA	NO DATA	NO DATA	NO DATA	NO DATA	NO DATA	NO DATA	NO DATA	NO DATA	NO DATA	NO DATA
Log2FC						-1.09698	-1.74357	-0.257344	-0.311004	-0.696761	-0.119551	-1.96336	-2.45918	-0.213649	-1.23643	0.314079	-1.51703	-0.196632	-0.0193531	0.326625	-2.00469	-0.630497	-0.768742	-1.87362	-1.23494	-1.31226	-1.47501	-0.711253	-1.83872	-2.63865	-3.08454	-0.577156	-3.32346	-0.523686	-0.434359	-4.16827	-3.11519	-1.57248	-3.36006	-5.90927	-1.64584	-1.45211	-1.96406	-1.28785	-1.46507	-0.226575	-0.59759	-2.48564	-0.409358
p-value						0.0530178	0.00782821	0.455634	0.225766	0.381884	0.221286	0.124411	0.00932564	0.0465605	0.0182738	0.193785	0.0363863	0.225612	0.847183	0.103635	0.00856665	0.0135611	0.00198803	0.00101676	0.0215249	0.0289872	0.00072506	0.0341502	0.000648255	0.000268241	0.00462939	0.00856004	0.0047034	0.490654	0.0112823	0.00133505	0.00135814	0.0022513	0.0105328	0.00146243	0.0402967	0.0314356	0.00548808	0.00907735	0.000974799	0.0379364	0.0440946	0.00624153	0.0580954
	DMSO	5W	1	5.45227e+06	1	7926.76	9614.23	2887.08	12419.2	7958.54	21078.3	19990.2	7480.09	20312.7	11731.1	9614.23	2821.43	21547.2	13588.8	13739.1	4934.47	10097.1	26108.1	14072.8	7101.06	10249.7	22026.5	7165.26	22026.5	4015.83	6081.46	11510.3	2773.87	5972.97	18160.4	11081.1	15260.2	339.679	635.874	26370.5	57526.4	14559.5	9172.82	28282.5	14129.2	10446.3	15428.9	5546.93	19148.9
	DMSO	5W	2	5.24318e+06	1	9877.35	12746.3	1923.69	11136.7	6118.06	27173.6	24587.7	7762.03	20889.5	14044.7	11125.6	3140.07	21938.5	13697.9	14809.1	5004.03	10861.7	27446.7	19811.1	10905.3	11521.8	20130.7	6380.49	23388.5	4146.42	6634.25	12887.3	3118.17	5738.77	18769.7	10435.8	13794.1	427.092	767.394	34891.6	66171.2	18844.9	13766.6	36315.5	13863.3	11170.1	19692.6	8006.43	27722.5
	DMSO	5W	3	5.95e+06	1	12581.7	14400.2	465.448	7692.49	1158.64	20973.2	13629.6	5949.13	18601.6	11048	8493.02	3022.98	19574.8	12112.6	12797.4	4647.11	8595.55	24100.8	15033	11048	13739.1	22697.3	3568.86	25591.1	4044.04	6574.81	10872.6	2609.72	5110.23	18251.5	16966.6	21268.9	442.748	681.98	37421.5	62944	19302.7	12469	32532.7	13974.6	9292.85	18694.8	8299.91	22026.5
	SCH772984	5W	1	2.325e+06	0.815645	19110.6	9643.12	4890.26	13213.6	4230.18	28001.1	15199.2	15898.8	21938.5	17535.8	12581.7	3707.08	22471.4	19870.7	17765.3	927.971	6607.76	27722.5	16026.5	9045.29	12531.5	29143.9	6470.44	26635.5	7339.31	10732.2	11920.3	1976.34	8699.32	18882.7	12320.3	16465.1	2155.98	7723.32	22026.5	66836.2	22697.3	10742.9	30946	12185.5	10807.5	19457.7	8982.2	20785.3
	SCH772984	5W	2	2.54545e+06	0.83489	20723	9358.12	3781.97	10981.9	480.103	26370.5	12332.6	13780.4	22697.3	17890	11203.7	3480.74	20973.2	17943.8	18033.7	1053.63	6528.94	27446.7	15914.7	9566.29	14200	27722.5	4745.73	27173.6	8630	12185.5	11248.6	1759.88	6502.88	17606.1	14429.1	17518.3	1627.82	6310.69	19574.8	62944	18215	11059	26903.2	9779.07	7230.04	20353.3	9090.63	22697.3
	SCH772984	5W	3	2.94545e+06	0.865896	19811.1	8964.25	1324.78	7044.48	4.53999e-05	23861	16090.8	7086.88	21375.5	13306.4	13643.2	4154.72	20496.3	13319.7	16949.6	1172.62	7136.66	24343	13821.8	8233.77	13932.8	28001.1	1513.23	28001.1	8258.51	11521.8	8848.47	900.545	4689.12	17890	14129.2	18751	1654.08	6161.03	24100.8	68186.4	16432.2	7654.12	30638.1	6953.5	7420.49	21461.2	10992.8	23623.6
Log2FC						0.972998	-0.394521	0.921993	-0.000391181	-1.69353	0.176475	-0.416131	0.794906	0.142479	0.40424	0.356555	0.336236	0.0200025	0.376118	0.351397	-2.20919	-0.543785	0.034087	-0.0961511	-0.114078	0.195514	0.388007	-0.427064	0.204338	0.989039	0.836172	-0.139595	-0.874645	0.241792	-0.021143	0.0871017	0.0675199	2.16861	3.27571	-0.586869	0.0849859	0.121656	-0.265529	-0.134457	-0.537291	-0.279916	0.187188	0.411467	-0.0380149
p-value						0.00240404	0.107375	0.282104	0.999075	0.222516	0.275153	0.222951	0.128388	0.0581332	0.0833458	0.0582933	0.0229126	0.771169	0.123498	0.00466822	8.08793e-06	0.0110927	0.692615	0.612029	0.614306	0.207376	0.00164503	0.466306	0.0317031	0.000484446	0.0003754	0.382337	0.0234146	0.437569	0.568306	0.732716	0.752592	0.00128508	0.000268221	0.0375594	0.272828	0.55444	0.319304	0.339559	0.0453252	0.230007	0.153179	0.0920799	0.832989
	DMSO	8W	1	4955000	1	5744.51	6568.23	848.95	9228.02	8408.51	15138.6	10087	7638.83	22247.8	11384.4	8655.93	1820.74	22247.8	11014.9	21461.2	4788.63	9749.78	24587.7	9311.45	3408.41	6863.68	16432.2	6386.87	14928.1	3013.93	4105.16	8006.43	1331.42	3812.35	22925.4	7208.39	10056.8	346.541	355.313	29732.6	22697.3	11825.3	10614.8	30031.4	12708.2	9036.26	16106.9	4398.42	18676.1
	DMSO	8W	2	4465000	1	8467.58	10916.2	2248.46	13293.1	7762.03	16383	9769.3	8630	19341.3	10949	9090.63	1650.77	23388.5	11980.1	17154.2	3778.19	7547.71	25848.3	11407.2	6393.26	7998.43	16448.7	7201.18	17836.5	2689.2	4745.73	9837.93	2735.31	4919.69	19950.3	9976.63	12493.9	308.277	464.518	35596.4	22471.4	12100.5	9575.85	31257.1	12271.1	10498.6	15646.5	6483.4	16203.8
	DMSO	8W	3	4680000	1	8664.59	12320.3	1887.48	11430	6614.37	17800.8	10530.2	9246.5	18996.3	11992.1	10604.1	1692.56	23388.5	12357.3	18160.4	10561.8	8119.31	22697.3	9348.77	11036.9	7324.65	15428.9	6298.08	20806.1	2472.54	4900.05	8821.97	2910.27	4429.31	21785.5	11361.7	12644.8	263.223	257.753	39340.1	18033.7	11059	6374.11	32209	17223	9710.86	16074.7	7044.48	15962.5
	SCH772984	8W	1	3475000	0.933722	18751	11707.7	1112.09	12295.6	2248.46	21184	12835.9	24343	23155.8	22026.5	11884.6	2895.75	21354.1	14559.5	25084.4	680.617	7450.23	26108.1	12797.4	7339.31	11092.2	21290.1	3261.69	23861	4689.12	7295.41	7346.66	2164.62	2517.45	18564.4	10927.1	13849.4	896.95	1908.36	31257.1	29732.6	13946.7	9633.49	29436.8	17961.7	9461.63	20231.6	8928.47	18490.3
	SCH772984	8W	2	2975000	0.899522	14928.1	7555.27	308.277	9163.65	484.928	19910.5	9547.17	7934.69	20171	13711.6	15017.9	3655.55	21807.3	11059	20537.3	1013.33	8848.47	23388.5	9623.85	4564.21	8176.34	17188.6	1274.11	20599	3707.08	4726.78	6502.88	74.2918	2319.25	19168	8433.78	11944.2	643.55	1257.65	20010.3	20702.3	9099.73	7065.65	27446.7	12887.3	6925.74	19594.4	6272.94	21763.7
	SCH772984	8W	3	2895000	0.893521	12823.1	6361.38	4.53999e-05	6542.01	4.53999e-05	20312.7	20394.1	6694.22	22925.4	13697.9	17641.3	3512.21	22697.3	8786.75	25084.4	929.828	11282.4	22247.8	7800.94	4367.74	8901.72	16026.5	460.356	19870.7	1642.54	2217.2	2363.74	89.5682	4.53999e-05	18788.5	5813.86	9433.29	512.858	414.47	20030.3	21982.5	10614.8	5464.35	25848.3	6775.04	5497.23	19380.1	4851.29	23155.8
Log2FC						1.02342	-0.218024	-1.81129	-0.277967	-3.05932	0.316163	0.493412	0.611071	0.128995	0.526285	0.651842	0.962549	-0.0677428	-0.0391702	0.316558	-2.86602	0.117898	-0.0276598	0.00740916	-0.356931	0.344475	0.174078	-1.99287	0.264066	0.29617	0.0503581	-0.717844	-1.58322	-1.44421	-0.194115	-0.181347	0.00128804	1.16136	1.73235	-0.553911	0.196355	-0.0556417	-0.261327	-0.176486	-0.165661	-0.41831	0.30789	0.161719	0.318673
p-value						0.0162827	0.588349	0.0903786	0.385207	0.00148647	0.00926801	0.268716	0.475811	0.250868	0.145372	0.0377657	0.00238491	0.126364	0.863784	0.0807091	0.0600004	0.608377	0.76798	0.976051	0.563103	0.100194	0.274351	0.00486934	0.161888	0.533056	0.918031	0.0991049	0.144295	0.0331529	0.0373545	0.588901	0.994861	0.0304295	0.128577	0.0759945	0.391961	0.778315	0.451768	0.0417524	0.693484	0.117626	0.000212859	0.648504	0.0622074
[truncated: 114 more columns]

## Sheet: Table 2-ChIP seq data (1W, Res)
ChIP-seq Peak			SCH772984 (1µM) for 1 Week vs. DMSO (1:1,000)					SCH772984 (1µM) Resistant vs. DMSO (1:1,000)					SCH772984 (1µM) Resistant vs. SCH772984 (1µM) for 1 Week
Chromosome	Start position	End position	baseMean	log2FoldChange	lfcSE	pvalue	padj	baseMean	log2FoldChange	lfcSE	pvalue	padj	baseMean	log2FoldChange	lfcSE	pvalue	padj
chr1	1000235	1000825	82.4046	0.134164	0.196469	0.26304	0.728726	82.4046	-0.0889973	0.179086	0.376357	0.806669	82.4046	-0.27327	0.281726	0.0453889	0.298748
chr1	100037708	100037990	18.9819	0.0593807	0.273039	0.603253	0.920005	18.9819	-0.0146434	0.237355	0.870375	0.974637	18.9819	-0.0782657	0.28641	0.494335	0.877665
chr1	100038152	100038849	71.4132	0.206084	0.229361	0.110421	0.520167	71.4132	0.0314574	0.176898	0.745967	0.947626	71.4132	-0.132374	0.216299	0.20082	0.65063
chr1	1001029	1001265	18.6689	0.0457988	0.26737	0.684956	0.940479	18.6689	-0.0639147	0.257962	0.499632	0.866575	18.6689	-0.139809	0.337464	0.281442	0.739367
chr1	100132755	100132913	13.1429	0.0595587	0.307278	0.606061	0.921183	13.1429	0.262406	0.478656	0.0774752	0.458146	13.1429	0.183254	0.401391	0.209542	0.662065
chr1	1001439	1001880	24.562	0.042276	0.245924	0.706889	0.947044	24.562	-0.252218	0.398908	0.0704659	0.435637	24.562	-0.48262	0.539521	0.029874	0.232313
chr1	100266201	100266756	42.6959	0.029258	0.214791	0.795539	0.967851	42.6959	-0.0167463	0.195013	0.857449	0.971261	42.6959	-0.0409086	0.200066	0.660821	0.936492
chr1	10032414	10032563	12.9648	0.029983	0.290978	0.789835	0.966687	12.9648	0.0292687	0.262455	0.748426	0.947981	12.9648	0.00587638	0.286102	0.958203	0.994087
chr1	10033022	10033608	73.642	0.175801	0.21508	0.158727	0.609202	73.642	0.0120847	0.174269	0.900889	0.979554	73.642	-0.132766	0.214011	0.197408	0.646506
chr1	10033670	10033941	19.3689	0.787237	0.686487	0.00667484	0.096954	19.3689	0.113857	0.30197	0.277779	0.739853	19.3689	-0.28517	0.441932	0.0924969	0.449048
chr1	10034057	10034269	11.9815	0.469968	0.624904	0.029979	0.256382	11.9815	-0.0219209	0.281441	0.811418	0.959864	11.9815	-0.678612	0.739826	0.0164354	0.158271
chr1	100350852	100351735	67.2521	-0.0333184	0.19623	0.770647	0.963104	67.2521	0.0109145	0.178372	0.90972	0.98096	67.2521	0.0351111	0.173657	0.685377	0.941425
chr1	100352529	100353002	32.8423	-0.000959886	0.22886	0.993126	0.999149	32.8423	0.011086	0.206495	0.903378	0.980144	32.8423	0.0123828	0.212021	0.896925	0.983012
chr1	100894518	100894713	12.2541	0.0449369	0.304328	0.693411	0.942859	12.2541	0.15444	0.373686	0.189071	0.654881	12.2541	0.11955	0.35301	0.358438	0.799495
chr1	100894882	100895947	109.907	-0.129715	0.183308	0.273487	0.738764	109.907	0.101018	0.166091	0.321744	0.77284	109.907	0.270216	0.25487	0.0375539	0.26708
chr1	100896138	100896487	22.4448	0.0374136	0.253882	0.738529	0.955139	22.4448	0.0201681	0.226027	0.823006	0.962751	22.4448	-0.0113988	0.23899	0.911028	0.985141
chr1	101025914	101026426	40.5673	-0.069885	0.224471	0.543621	0.897944	40.5673	-0.00709663	0.195012	0.939164	0.985944	40.5673	0.0508738	0.2078	0.593989	0.917686
chr1	101236160	101236346	6.13848	0.0451131	0.355478	0.692818	NA	6.13848	-0.21486	0.546032	0.112395	0.537338	6.13848	-0.387746	0.691366	0.0523069	0.324845
chr1	1012837	1013321	22.4707	0.311552	0.431147	0.064484	0.398513	22.4707	-0.051972	0.246025	0.575655	0.896953	22.4707	-0.624047	0.608741	0.0165593	0.158871
chr1	1013562	1013878	17.2678	1.17046	0.775875	0.00167827	0.0366279	17.2678	-0.00599188	0.259143	0.946988	0.987051	17.2678	-1.32404	0.760589	0.00129119	0.0264482
chr1	1019642	1019986	29.3655	-0.0233045	0.234225	0.834634	0.976886	29.3655	0.0188204	0.20992	0.836535	0.966777	29.3655	0.0411591	0.225454	0.678574	0.940645
chr1	1020157	1020529	26.772	0.508384	0.521819	0.0185982	0.190469	26.772	0.195125	0.335558	0.111309	0.534805	26.772	-0.0851438	0.254414	0.430448	0.842668
chr1	10209734	10210307	43.5053	0.126964	0.241521	0.295444	0.756161	43.5053	-0.0182612	0.19769	0.844066	0.968538	43.5053	-0.144383	0.267056	0.213251	0.666494
chr1	10210603	10211417	57.7011	0.112339	0.2173	0.345241	0.797099	57.7011	0.0372422	0.187128	0.696947	0.935622	57.7011	-0.0505396	0.187274	0.576606	0.91101
chr1	1021302	1021560	14.6442	-0.0519737	0.289731	0.648761	0.930763	14.6442	-0.0339584	0.256216	0.710054	0.938917	14.6442	0.00961472	0.280551	0.93101	0.989368
chr1	1025119	1025446	22.6263	0.596739	0.610399	0.0144187	0.161975	22.6263	1.02975	0.756266	0.0024944	0.0568889	22.6263	0.0639553	0.253387	0.548594	0.899967
chr1	103525708	103525921	19.7448	0.0330329	0.260514	0.767781	0.962681	19.7448	0.0413482	0.237756	0.651755	0.922075	19.7448	0.0160007	0.248131	0.877904	0.9805
chr1	103526050	103526362	23.4659	-0.0886064	0.267103	0.450371	0.858884	23.4659	-0.053355	0.230909	0.5662	0.894524	23.4659	0.0189759	0.237997	0.852197	0.977526
chr1	10398315	10398791	27.0699	-0.0308753	0.240326	0.782427	0.965771	27.0699	-0.145236	0.288141	0.185465	0.650213	27.0699	-0.125262	0.294582	0.296054	0.752874
chr1	10399074	10399408	34.1255	0.00965355	0.229185	0.93099	0.991964	34.1255	0.0834289	0.225333	0.390956	0.815549	34.1255	0.0801038	0.239467	0.442446	0.849281
chr1	10430823	10431106	17.9093	0.113643	0.307435	0.354597	0.803092	17.9093	0.0255434	0.243495	0.77742	0.952717	17.9093	-0.0739563	0.286549	0.517606	0.887523
chr1	10471313	10471711	11.713	-0.0364682	0.299623	0.747299	0.957076	11.713	-0.0376774	0.273221	0.683671	0.932471	11.713	-0.00949915	0.300276	0.934034	0.989799
chr1	10471853	10472407	36.3348	-0.0120864	0.226336	0.913808	0.990365	36.3348	0.0509834	0.210039	0.586747	0.900817	36.3348	0.0653916	0.227438	0.516133	0.886473
chr1	10472832	10473032	12.2646	0.00986871	0.295961	0.929707	0.991964	12.2646	-0.0339232	0.275376	0.713182	0.939038	12.2646	-0.0540685	0.317345	0.649588	0.932935
chr1	10474283	10474785	21.8795	-0.170653	0.329017	0.20121	0.667874	21.8795	-0.015132	0.223332	0.866536	0.973853	21.8795	0.14257	0.325177	0.264621	0.724866
chr1	10474966	10475774	85.6629	0.129153	0.193871	0.279208	0.744232	85.6629	0.0666219	0.172226	0.503394	0.868605	85.6629	-0.0344982	0.156524	0.675581	0.940027
chr1	10511550	10511720	5.32024	-0.114917	0.427746	0.346512	NA	5.32024	-0.201651	0.53771	0.12366	0.560613	5.32024	-0.0794345	0.437452	0.536184	0.894761
chr1	10528040	10528257	9.20328	0.00389966	0.307298	0.972248	0.99744	9.20328	-0.123457	0.3734	0.266974	0.730228	9.20328	-0.166952	0.43092	0.254267	0.713273
chr1	107056733	107057127	18.7307	-0.0114767	0.258196	0.917627	0.990777	18.7307	-0.0805928	0.264593	0.407699	0.824977	18.7307	-0.0832786	0.28941	0.470684	0.864287
chr1	10778595	10779240	59.1805	0.0155581	0.198733	0.891182	0.987789	59.1805	-0.0221893	0.182645	0.816671	0.960899	59.1805	-0.0322302	0.177594	0.71274	0.945481
chr1	10779521	10780246	50.622	-0.0355427	0.212101	0.753854	0.959329	50.622	-0.0115179	0.191069	0.902262	0.979922	50.622	0.0172684	0.188938	0.847852	0.976882
chr1	1079278	1080335	68.7568	0.343626	0.293774	0.0250721	0.229233	68.7568	0.052254	0.181255	0.592135	0.902292	68.7568	-0.214083	0.266574	0.0860622	0.432548
chr1	1080510	1080681	10.7078	0.0688268	0.318137	0.556078	0.903874	10.7078	-0.0168369	0.273873	0.85353	0.970637	10.7078	-0.0985066	0.349793	0.439563	0.847778
chr1	108199905	108200241	25.2904	0.112465	0.275244	0.352259	0.801532	25.2904	0.092925	0.249995	0.347044	0.788544	25.2904	0.000471336	0.225308	0.996191	0.999202
chr1	108660923	108661736	116.45	0.226897	0.198633	0.0719023	0.42028	116.45	0.172981	0.180048	0.108212	0.528028	116.45	-0.0157583	0.138857	0.838806	0.974959
chr1	108692311	108692900	60.2067	0.156894	0.228066	0.205867	0.673634	60.2067	0.127166	0.207645	0.220588	0.687183	60.2067	-0.00403712	0.170719	0.962307	0.995193
chr1	108746720	108747350	70.4772	0.110159	0.202336	0.352479	0.801575	70.4772	0.032359	0.177301	0.738865	0.945328	70.4772	-0.0525381	0.174507	0.548385	0.899883
chr1	108815178	108815373	9.71885	0.74178	0.850748	0.00750903	0.104924	9.71885	0.480149	0.759019	0.0241053	0.248098	9.71885	-0.0599923	0.330789	0.621347	0.924543
chr1	108815392	108817750	206.625	-0.0723007	0.144363	0.510843	0.885729	206.625	-0.122813	0.140609	0.221217	0.687553	206.625	-0.0407219	0.121021	0.575601	0.910756
chr1	108828388	108828668	16.1118	-0.00180896	0.274103	0.987014	0.999149	16.1118	0.0829423	0.277468	0.398829	0.818868	16.1118	0.10505	0.318254	0.39212	0.819047
chr1	108828837	108829024	9.16242	-0.242668	0.485028	0.119922	0.541615	9.16242	-0.0799012	0.31831	0.425576	0.833239	9.16242	0.103633	0.380607	0.431689	0.843191
chr1	108829971	108831617	110.359	-0.588821	0.311267	0.00126873	0.0300153	110.359	-0.113376	0.167285	0.269661	0.731968	110.359	0.290496	0.266424	0.0321236	0.242315
chr1	108877080	108877251	14.9307	0.0539521	0.28579	0.63647	0.927753	14.9307	0.0267002	0.250812	0.768261	0.95223	14.9307	-0.0197517	0.272362	0.856847	0.977819
chr1	108962979	108963415	45.1841	0.311647	0.336249	0.046352	0.331398	45.1841	0.182221	0.263247	0.11125	0.534652	45.1841	-0.0377609	0.192382	0.679114	0.940931
chr1	109041283	109042020	54.2678	0.271963	0.287054	0.0590228	0.381094	54.2678	-0.00988305	0.187191	0.916709	0.982754	54.2678	-0.309623	0.341173	0.0459031	0.30079
chr1	109076116	109076830	63.3512	-0.0240977	0.19553	0.832723	0.97636	63.3512	0.00628259	0.178246	0.947941	0.987329	63.3512	0.0236869	0.170502	0.78201	0.961754
chr1	109079553	109079805	18.2551	-0.318659	0.465875	0.0657841	0.402681	18.2551	-0.0465869	0.24146	0.61328	0.91028	18.2551	0.199562	0.393928	0.176061	0.617502
chr1	109080046	109080350	20.727	-0.0304127	0.258549	0.785409	0.966007	20.727	0.0283399	0.230672	0.75431	0.948813	20.727	0.0641031	0.267193	0.558952	0.903982
chr1	109089466	109090669	108.192	-0.00307578	0.171055	0.978514	0.998345	108.192	-0.101341	0.167242	0.320268	0.772262	108.192	-0.0842144	0.166339	0.33549	0.785237
chr1	109090714	109091714	90.7733	0.185699	0.206367	0.135991	0.571595	90.7733	0.0635384	0.17151	0.522885	0.877148	90.7733	-0.0757323	0.171861	0.390569	0.817895
chr1	109099794	109100004	16.5008	-0.0979765	0.301421	0.414737	0.84199	16.5008	-0.0326605	0.243787	0.719313	0.940023	16.5008	0.0516892	0.280627	0.644527	0.931388
chr1	109100242	109100683	72.0122	0.0603651	0.193685	0.600975	0.919725	72.0122	0.028721	0.176098	0.767473	0.95223	72.0122	-0.0192666	0.163788	0.818313	0.971032
chr1	109100768	109100913	9.9209	0.106639	0.357538	0.388499	0.826001	9.9209	0.0698395	0.313305	0.478305	0.859195	9.9209	-0.0185901	0.312953	0.873767	0.979665
chr1	109213558	109213747	13.8989	-0.000903858	0.281898	0.993524	0.999149	13.8989	-0.00592708	0.252821	0.947403	0.987296	13.8989	-0.00640978	0.282001	0.954086	0.99318
chr1	109213980	109214290	27.3586	0.0807402	0.254647	0.486843	0.875746	27.3586	-0.00342399	0.21602	0.969721	0.993118	27.3586	-0.0791495	0.254907	0.462556	0.859627
chr1	109282669	109282887	12.3679	0.0663499	0.324228	0.569952	0.910223	12.3679	0.482519	0.678026	0.024122	0.248173	12.3679	0.31616	0.523521	0.0882316	0.438447
chr1	109283355	109283889	63.7133	0.0270955	0.197498	0.812197	0.971645	63.7133	0.217372	0.24394	0.0655748	0.420121	63.7133	0.192609	0.260926	0.1102	0.492689
chr1	109425897	109426362	40.5755	0.209684	0.291727	0.124077	0.548262	40.5755	0.138393	0.245656	0.192752	0.658874	40.5755	-0.0225202	0.197121	0.80679	0.968487
chr1	109426717	109427156	43.2821	0.0495907	0.21691	0.663072	0.935089	43.2821	0.0384914	0.19652	0.682877	0.932301	43.2821	-0.00268045	0.189548	0.976252	0.996681
chr1	109483972	109484427	31.0325	-0.135852	0.271273	0.273309	0.73864	31.0325	0.00877165	0.205561	0.92353	0.984047	31.0325	0.145015	0.293191	0.233138	0.690265
chr1	109494095	109494490	15.9747	0.017276	0.27204	0.87672	0.985027	15.9747	-0.0549207	0.262722	0.557869	0.891406	15.9747	-0.0885724	0.30969	0.45978	0.858321
chr1	109546668	109547066	24.7335	0.0544659	0.250096	0.630962	0.926719	24.7335	-0.0066257	0.219102	0.94133	0.986307	24.7335	-0.0582653	0.247345	0.578962	0.911961
chr1	109547934	109548457	38.8406	0.066452	0.226127	0.562454	0.907076	38.8406	-0.0074658	0.198976	0.935545	0.985552	38.8406	-0.065134	0.218233	0.508621	0.884538
chr1	109548664	109548973	31.3739	0.048325	0.23367	0.669108	0.936602	31.3739	0.0012541	0.207041	0.989016	0.997631	31.3739	-0.0406566	0.219823	0.678135	0.940601
chr1	109619289	109619482	15.2274	-0.132725	0.334511	0.297378	0.757457	15.2274	-0.0337328	0.249336	0.711142	0.939038	15.2274	0.0807901	0.308293	0.497233	0.878535
chr1	109619815	109621020	114.371	-0.158063	0.183618	0.18732	0.64938	114.371	-0.0534899	0.159042	0.592448	0.902292	114.371	0.0661332	0.156419	0.43	0.842258
chr1	109656098	109656411	9.84176	-0.00107888	0.313678	0.992328	0.999149	9.84176	0.0218983	0.284185	0.811936	0.959864	9.84176	0.0293385	0.324442	0.805309	0.968084
chr1	109740025	109740282	12.2912	-0.0154373	0.296206	0.890392	0.98746	12.2912	0.117928	0.331689	0.273174	0.735225	12.2912	0.179159	0.407117	0.220233	0.675323
chr1	109790805	109791438	43.1723	0.416676	0.42329	0.0247517	0.227374	43.1723	1.58226	0.45918	2.52482e-05	0.00181307	43.1723	0.343527	0.38391	0.0426166	0.287445
chr1	109791567	109792173	38.3853	0.556171	0.493759	0.0115017	0.140066	38.3853	1.1539	0.58233	0.000586912	0.0204661	38.3853	0.0974218	0.235618	0.351714	0.795936
chr1	109792423	109795566	207.549	0.390747	0.204324	0.00387554	0.0668802	207.549	1.73811	0.193078	8.06465e-20	4.21795e-16	207.549	1.13898	0.188996	2.62365e-10	5.48886e-08
chr1	109802687	109803203	22.9767	1.22795	0.772646	0.00133233	0.0311773	22.9767	2.25061	0.625608	9.73691e-06	0.000870524	22.9767	0.196011	0.354448	0.16198	0.595114
chr1	109820944	109821258	21.0074	0.066717	0.271729	0.56172	0.90679	21.0074	0.180807	0.342973	0.133332	0.575846	21.0074	0.109128	0.29598	0.357944	0.799193
chr1	109821520	109822443	84.4853	0.0399389	0.190338	0.727806	0.952216	84.4853	1.01549	0.369939	7.12263e-05	0.00413917	84.4853	0.899026	0.339701	0.000302012	0.00867104
chr1	109822622	109824404	138.686	0.10701	0.1681	0.355045	0.803382	138.686	0.482802	0.264247	0.00123235	0.035061	138.686	0.296319	0.236	0.0215415	0.189673
chr1	109824410	109825731	77.4254	0.487961	0.363936	0.0082027	0.111818	77.4254	1.8222	0.312268	1.54843e-09	4.9583e-07	77.4254	0.867803	0.351136	0.000467833	0.0120832
chr1	109828097	109828362	10.4449	0.210181	0.46035	0.154383	0.601876	10.4449	0.347385	0.611566	0.0487063	0.363139	10.4449	0.0694079	0.3348	0.571611	0.908515
chr1	109828948	109829511	21.1921	0.499594	0.611342	0.0251755	0.229728	21.1921	2.28205	0.631875	8.8646e-06	0.000801671	21.1921	0.657755	0.612272	0.0140308	0.142769
chr1	109833316	109834631	50.6254	0.0110469	0.221331	0.921395	0.991185	50.6254	1.74265	0.394247	1.46717e-06	0.000188693	50.6254	1.64836	0.39731	2.67032e-06	0.000177914
chr1	109834737	109834946	10.3558	-0.09529	0.375982	0.432647	0.850412	10.3558	0.464814	0.694246	0.0267664	0.263549	10.3558	1.04513	0.921225	0.00415616	0.0616082
chr1	109835614	109836927	63.9533	0.0800653	0.218576	0.490328	0.877739	63.9533	2.12145	0.34043	9.2429e-11	4.39472e-08	63.9533	1.84003	0.338844	5.55521e-09	7.48189e-07
chr1	109837418	109838162	35.4545	0.131679	0.28667	0.289474	0.750905	35.4545	2.23221	0.456356	1.25898e-07	2.324e-05	35.4545	1.68306	0.461368	1.39129e-05	0.000728885
chr1	109838535	109838842	24.1974	-0.00451661	0.266888	0.96754	0.996582	24.1974	1.41739	0.721727	0.000558687	0.0198328	24.1974	1.43061	0.654808	0.000533343	0.013454
chr1	109838934	109839449	26.402	-0.0268862	0.255604	0.809439	0.971027	26.402	1.30121	0.661545	0.000595464	0.0207165	26.402	1.45561	0.583001	0.000290202	0.00839709
chr1	109839656	109839851	7.6812	0.00936302	0.347279	0.933414	0.991964	7.6812	0.365356	0.649214	0.0438966	0.345066	7.6812	0.407862	0.652466	0.0542317	0.330905
chr1	109910337	109910612	12.949	0.302238	0.527877	0.0787902	0.441048	12.949	1.29064	0.965697	0.00163613	0.0424676	12.949	0.250925	0.460843	0.129753	0.535006
chr1	109910771	109911043	13.2438	-0.0404022	0.297959	0.72167	0.951459	13.2438	0.0661196	0.281482	0.491368	0.863999	13.2438	0.140771	0.370782	0.298722	0.754706
chr1	109911193	109911775	33.5659	0.286677	0.377988	0.0698432	0.414711	33.5659	1.07683	0.634635	0.00114407	0.0332427	33.5659	0.19743	0.323945	0.142017	0.558634
chr1	109984334	109984488	10.9444	0.045763	0.315056	0.689043	0.941951	10.9444	0.173811	0.407459	0.160694	0.618819	10.9444	0.136367	0.378608	0.315909	0.770063
chr1	109984821	109985194	30.3727	0.048749	0.239288	0.666127	0.936038	30.3727	0.091309	0.236012	0.353274	0.793365	30.3727	0.0493505	0.22745	0.621817	0.924631
chr1	110034646	110035230	51.1809	0.0701151	0.213476	0.543434	0.897929	51.1809	0.0937094	0.203885	0.346254	0.787775	51.1809	0.0294403	0.184738	0.741379	0.953139
chr1	11012379	11013162	72.1141	0.220108	0.233168	0.0927129	0.480214	72.1141	0.0611529	0.179165	0.534423	0.881539	72.1141	-0.102792	0.196863	0.28523	0.743316
chr1	110337247	110338770	164.269	0.138482	0.1604	0.228618	0.697883	164.269	0.153656	0.155194	0.13896	0.585718	164.269	0.0196984	0.124568	0.788562	0.963596
chr1	110339458	110339838	41.6975	0.337593	0.365231	0.0401162	0.305638	41.6975	0.101808	0.224867	0.308807	0.763682	41.6975	-0.11353	0.244987	0.293453	0.750929
chr1	110407309	110407666	39.2763	0.0584159	0.227777	0.608418	0.922052	39.2763	0.0331847	0.203308	0.720883	0.940801	39.2763	-0.0146707	0.201601	0.874747	0.979987
chr1	110407927	110408240	21.6329	0.023758	0.257148	0.831056	0.975963	21.6329	0.0269219	0.231954	0.765928	0.95223	21.6329	0.00857857	0.24568	0.933967	0.989795
chr1	11059551	11059927	24.619	-0.00878876	0.247596	0.936845	0.992733	24.619	0.183744	0.32325	0.123732	0.560622	24.619	0.250285	0.392901	0.107352	0.486682
chr1	11060311	11060629	27.4023	0.0493611	0.242243	0.66221	0.935089	27.4023	0.0214957	0.214614	0.813081	0.960038	27.4023	-0.0198831	0.222579	0.839559	0.974959
chr1	110963079	110963264	11.8758	-0.0994223	0.33084	0.413893	0.8417	11.8758	-0.0343832	0.266319	0.708093	0.938187	11.8758	0.0529583	0.312004	0.653714	0.934462
chr1	110963352	110963903	78.0992	0.129076	0.199591	0.281008	0.744975	78.0992	0.0405727	0.173592	0.678904	0.93107	78.0992	-0.0580139	0.170402	0.503959	0.881594
chr1	11099309	11099808	46.9668	0.13262	0.238323	0.276583	0.741854	46.9668	0.105299	0.215303	0.295658	0.754177	46.9668	-0.00430112	0.185992	0.961532	0.994671
chr1	11100113	11100349	15.5174	-0.273514	0.45573	0.0930958	0.481281	15.5174	0.00731143	0.240091	0.934924	0.985391	15.5174	0.330818	0.5146	0.0782099	0.409468
chr1	111139267	111140155	81.5572	0.0826443	0.190882	0.478133	0.871057	81.5572	-0.0141716	0.171949	0.8844	0.977257	81.5572	-0.077231	0.179932	0.392098	0.819047
chr1	111140269	111140645	41.0223	0.115053	0.239264	0.337048	0.791491	41.0223	0.121994	0.230454	0.237136	0.702099	41.0223	0.0197755	0.193843	0.828408	0.973457
chr1	111448942	111449193	12.7131	-0.0126925	0.285684	0.909468	0.990103	12.7131	-0.0823712	0.299337	0.407687	0.824977	12.7131	-0.0877793	0.329783	0.476672	0.869324
chr1	111449487	111449713	22.1638	-0.00238606	0.249148	0.982825	0.999149	22.1638	0.00875968	0.223398	0.92232	0.983659	22.1638	0.012108	0.238928	0.905509	0.984225
chr1	111507663	111508284	46.9392	-0.0424341	0.213614	0.708726	0.947577	46.9392	0.0516471	0.195311	0.588605	0.901688	46.9392	0.0923792	0.222751	0.361788	0.801557
chr1	1115702	1116082	27.261	0.0408327	0.24041	0.716385	0.949969	27.261	-0.0422322	0.221095	0.64659	0.920235	27.261	-0.0902186	0.26165	0.411853	0.830934
chr1	111619882	111620268	25.2231	0.0144418	0.242179	0.896592	0.988741	25.2231	-0.0217528	0.219901	0.81014	0.959774	25.2231	-0.0377157	0.23746	0.711714	0.945225
chr1	1116488	1116683	7.5633	0.150289	0.417562	0.25764	0.724549	7.5633	0.0111835	0.308087	0.904227	0.980144	7.5633	-0.144187	0.425854	0.309066	0.76525
chr1	111755308	111756250	67.2345	-0.0215465	0.195133	0.850174	0.98016	67.2345	0.0166826	0.178264	0.862588	0.973	67.2345	0.031137	0.171884	0.717681	0.947265
chr1	112251342	112251521	11.036	-1.06405	1.09826	0.000280437	0.00931903	11.036	0.131768	0.357229	0.239155	0.703564	11.036	1.90341	1.27496	2.29234e-05	0.0010785
chr1	112252300	112252715	18.1232	-1.93222	0.885133	7.58648e-05	0.00319314	18.1232	0.0125804	0.232266	0.888446	0.977537	18.1232	2.17009	0.879727	4.97692e-05	0.00201005
chr1	112395801	112396004	19.5266	-0.00875407	0.255545	0.937083	0.992733	19.5266	-0.180775	0.356017	0.136855	0.582189	19.5266	-0.209476	0.393857	0.159874	0.59142
chr1	112396219	112396567	19.3166	-0.0031404	0.25915	0.977402	0.998162	19.3166	-0.0262911	0.236465	0.771063	0.952693	19.3166	-0.0278345	0.257817	0.793803	0.965854
chr1	112618606	112619639	135.162	0.0568976	0.168217	0.619386	0.92399	135.162	0.16462	0.172214	0.121771	0.557942	135.162	0.0904368	0.160945	0.296014	0.752834
chr1	112619846	112620325	67.8187	0.0339758	0.193833	0.76654	0.96205	67.8187	-0.0248542	0.178214	0.797013	0.955998	67.8187	-0.048605	0.176213	0.579751	0.911961
chr1	112621967	112622254	6.35338	-0.248088	0.531779	0.108318	NA	6.35338	-0.329754	0.650629	0.0513248	0.373521	6.35338	-0.0451103	0.398616	0.719129	0.947502
chr1	11262247	11262540	23.0541	-0.0234518	0.248753	0.833169	0.976464	23.0541	-0.0408509	0.229465	0.655826	0.92314	23.0541	-0.0239035	0.241169	0.815868	0.970885
chr1	11262906	11263211	30.7014	-0.0124335	0.234585	0.911044	0.990224	30.7014	0.0102113	0.210704	0.910473	0.98132	30.7014	0.0219192	0.220963	0.822748	0.97168
chr1	112674737	112675209	28.4262	0.316044	0.396849	0.055993	0.36938	28.4262	-0.0549695	0.229205	0.555494	0.890294	28.4262	-0.638717	0.561012	0.012764	0.13369
chr1	112699224	112699546	12.5438	-0.0105339	0.285258	0.924773	0.991831	12.5438	-0.313244	0.54828	0.0578073	0.397731	12.5438	-0.355866	0.565603	0.0716192	0.390391
chr1	112699975	112700248	11.8896	0.0115282	0.28882	0.917793	0.990777	11.8896	-0.187989	0.423071	0.141976	0.589514	11.8896	-0.271615	0.500555	0.11785	0.50886
chr1	112700388	112700988	36.6786	0.0457637	0.224442	0.686076	0.940873	36.6786	-0.109777	0.235353	0.278553	0.740435	36.6786	-0.198259	0.319878	0.138279	0.552291
chr1	112701066	112701356	19.6153	0.0514082	0.272059	0.650529	0.931455	19.6153	-0.0525497	0.253698	0.57247	0.896569	19.6153	-0.129646	0.331438	0.309545	0.765347
chr1	112704773	112705030	13.8033	-0.00968043	0.291245	0.930955	0.991964	13.8033	0.143499	0.352553	0.207821	0.674729	13.8033	0.20358	0.422472	0.181111	0.62483
chr1	112705446	112706331	63.5047	-0.0722803	0.20034	0.532857	0.89426	63.5047	-0.0804102	0.187645	0.417312	0.829869	63.5047	-0.0156289	0.170717	0.854995	0.977526
chr1	112706583	112707116	48.9025	-0.177169	0.252717	0.167258	0.620447	48.9025	-0.00704812	0.187272	0.94051	0.986073	48.9025	0.151101	0.260103	0.18984	0.636674
chr1	112707273	112707444	10.5957	-0.0686102	0.32919	0.558236	0.90468	10.5957	0.0468668	0.284771	0.618055	0.912065	10.5957	0.152509	0.403986	0.280904	0.739021
chr1	11273218	11273475	27.6844	-0.0952789	0.264542	0.420002	0.84478	27.6844	0.0160172	0.214792	0.859715	0.972311	27.6844	0.114678	0.284339	0.325989	0.77847
chr1	11273600	11273776	13.9514	-0.0700135	0.302265	0.547803	0.900165	13.9514	0.0443148	0.259215	0.631517	0.915715	13.9514	0.145668	0.36617	0.282003	0.739743
chr1	112849534	112850284	56.1835	-0.0609467	0.211064	0.595591	0.918601	56.1835	0.271805	0.295219	0.0385229	0.320038	56.1835	0.553263	0.422297	0.00981926	0.112061
chr1	112902839	112903076	8.03911	0.0374696	0.378275	0.737269	0.954891	8.03911	1.08373	1.07645	0.0025207	0.057196	8.03911	0.92772	0.935456	0.00567864	0.0768772
chr1	112903281	112903445	7.47623	0.0760696	0.37767	0.518036	0.888689	7.47623	0.313745	0.615833	0.058651	0.399847	7.47623	0.198063	0.480095	0.202588	0.652777
chr1	112903529	112904006	22.071	-0.0439703	0.27825	0.697283	0.944504	22.071	1.39585	0.728402	0.000619757	0.0213252	22.071	1.64559	0.640554	0.000187293	0.00596091
chr1	112904477	112904890	21.7103	-0.106976	0.29628	0.377323	0.818343	21.7103	0.209244	0.36158	0.100876	0.512126	21.7103	0.685181	0.631241	0.0129733	0.135254
chr1	112905354	112905617	12.1059	-0.092585	0.380723	0.443151	0.854657	12.1059	1.46333	0.972859	0.000964223	0.0294055	12.1059	1.91514	0.938876	0.000166482	0.0054251
chr1	112907178	112907479	9.16322	-0.1143	0.450937	0.330342	0.786397	9.16322	1.32594	1.09324	0.00132804	0.0368807	9.16322	1.4906	1.15869	0.000393031	0.0105236
chr1	112955060	112955311	13.343	0.00934795	0.283295	0.933172	0.991964	13.343	-0.0907352	0.306167	0.370091	0.80367	13.343	-0.129576	0.362185	0.329067	0.781418
chr1	112955424	112956213	81.9975	0.0361759	0.186033	0.752602	0.958871	81.9975	0.0289893	0.171292	0.767196	0.95223	81.9975	-0.00171631	0.155935	0.983252	0.997292
chr1	112956371	112957494	124.222	0.0962417	0.169993	0.40538	0.836864	124.222	0.0993104	0.160303	0.329255	0.776712	124.222	0.0105643	0.135212	0.890051	0.982293
chr1	112957770	112958087	20.3102	-0.0102353	0.25226	0.926478	0.991831	20.3102	-0.235264	0.403824	0.0848874	0.476795	20.3102	-0.270275	0.437631	0.103822	0.477228
chr1	113072762	113072932	10.4958	-0.0223432	0.303293	0.842547	0.978476	10.4958	-0.0194604	0.272753	0.831114	0.965742	10.4958	-0.00153444	0.30744	0.989441	0.998277
chr1	113073175	113073941	68.6082	0.181511	0.22635	0.150965	0.595811	68.6082	-0.0213217	0.17957	0.824711	0.963166	68.6082	-0.205043	0.267015	0.0970711	0.460427
chr1	113758728	113759953	115.536	0.136113	0.182514	0.251397	0.719688	115.536	0.217657	0.196827	0.0544691	0.384815	115.536	0.0640646	0.154844	0.44175	0.849229
chr1	113811796	113812229	38.4679	-0.00694638	0.218275	0.950592	0.993887	38.4679	-0.0403454	0.202218	0.666406	0.926671	38.4679	-0.0346011	0.205001	0.713514	0.945711
chr1	113812683	113812995	29.4887	0.0814038	0.252052	0.483381	0.874391	29.4887	0.204765	0.323663	0.0966818	0.504825	29.4887	0.107217	0.264753	0.337967	0.786519
chr1	113904492	113904857	32.2347	-0.119758	0.257836	0.322752	0.781408	32.2347	-0.0703765	0.219201	0.461582	0.849157	32.2347	0.0250878	0.215907	0.795256	0.96599
chr1	113929051	113930143	67.1192	0.154639	0.218492	0.20909	0.676104	67.1192	-0.0335175	0.181175	0.728217	0.94298	67.1192	-0.194639	0.262983	0.108586	0.489639
chr1	1144882	1145053	4.95452	-0.0996162	0.408483	0.407433	NA	4.95452	-0.0609766	0.357729	0.537598	0.882558	4.95452	0.0275197	0.393023	0.824516	0.972091
chr1	114510641	114511096	31.0337	0.213404	0.319747	0.126738	0.554087	31.0337	0.0100718	0.211743	0.911584	0.981429	31.0337	-0.191367	0.328215	0.154727	0.58247
chr1	114511338	114512002	60.4634	0.114775	0.217072	0.335791	0.79064	60.4634	0.199675	0.246283	0.0846502	0.476657	60.4634	0.0703258	0.193299	0.449356	0.852503
chr1	114581891	114582118	17.5379	-0.0029939	0.264392	0.978469	0.998345	17.5379	-0.0260976	0.241274	0.772732	0.952693	17.5379	-0.0281637	0.264726	0.794286	0.965893
chr1	114716078	114716778	60.758	0.116844	0.211548	0.327314	0.785162	60.758	-0.018017	0.18198	0.850684	0.970093	60.758	-0.12103	0.221598	0.242384	0.700771
chr1	114716892	114717198	26.3583	0.069033	0.250799	0.54756	0.900165	26.3583	0.0206233	0.217048	0.820072	0.962241	26.3583	-0.0378951	0.231467	0.706558	0.944674
chr1	114757651	114757969	48.2719	-0.021974	0.209089	0.845923	0.979465	48.2719	-0.0192565	0.190263	0.837977	0.967133	48.2719	-0.000789863	0.185189	0.992917	0.998424
chr1	114758166	114758477	20.3423	0.0972627	0.283684	0.414465	0.84199	20.3423	0.0528665	0.242221	0.569331	0.895817	20.3423	-0.0261706	0.247053	0.801395	0.967349
chr1	114780429	114780603	17.4351	0.017351	0.272337	0.8762	0.984943	17.4351	0.087119	0.27838	0.378908	0.808165	17.4351	0.08468	0.29857	0.470688	0.864287
chr1	114780780	114781167	19.6398	-0.00909298	0.25819	0.934666	0.992472	19.6398	-0.0201924	0.233505	0.82248	0.962626	19.6398	-0.0148589	0.25262	0.887631	0.982031
chr1	115545233	115545731	35.9346	1.2577	0.576021	0.000440065	0.0134111	35.9346	1.3645	0.593539	0.000297101	0.0125314	35.9346	0.00875735	0.199825	0.924644	0.988104
chr1	115545969	115546304	23.4836	0.0689389	0.27022	0.549443	0.900589	23.4836	0.39759	0.514284	0.0278746	0.268241	23.4836	0.253127	0.404188	0.108805	0.490154
chr1	115546675	115546833	11.6799	0.16502	0.405336	0.226508	0.696467	11.6799	0.690969	0.812851	0.0107848	0.149874	11.6799	0.220982	0.444778	0.162041	0.595225
chr1	115642195	115642449	13.2844	0.188369	0.406451	0.183759	0.643894	13.2844	0.231527	0.459289	0.0987192	0.507521	13.2844	0.0367421	0.291283	0.746471	0.953618
chr1	1157685	1158991	128.065	-0.447882	0.256563	0.0036487	0.0640115	128.065	-0.0336143	0.152452	0.735767	0.944329	128.065	0.393714	0.273822	0.00985304	0.112272
chr1	116373558	116373898	17.8594	-0.102951	0.294725	0.392946	0.829354	17.8594	-0.142643	0.320696	0.200599	0.667327	17.8594	-0.0464388	0.273158	0.673697	0.939434
chr1	116373991	116374325	14.3761	-0.101971	0.318656	0.401517	0.835067	14.3761	-0.191089	0.403535	0.13357	0.576478	14.3761	-0.0803752	0.322164	0.508207	0.884323
chr1	11654336	11654590	16.1812	0.111998	0.316874	0.362574	0.808342	16.1812	-0.00946936	0.249458	0.916017	0.982629	16.1812	-0.132835	0.346017	0.308842	0.764991
chr1	11654953	11655395	22.8086	-0.0682984	0.260971	0.552103	0.901821	22.8086	-0.0642656	0.239346	0.495795	0.864872	22.8086	-0.00839977	0.239768	0.934479	0.989967
chr1	116570529	116571016	36.5918	-0.040181	0.224693	0.721844	0.951459	36.5918	-0.0235177	0.201585	0.799295	0.956522	36.5918	0.00968588	0.203211	0.917423	0.986502
chr1	11664249	11664975	50.9412	0.109699	0.220482	0.355919	0.803757	50.9412	0.0400468	0.189999	0.674449	0.929575	50.9412	-0.0460305	0.188946	0.611941	0.922357
chr1	11680779	11681178	26.4321	0.193395	0.33246	0.160058	0.611422	26.4321	0.292186	0.419571	0.0503868	0.370041	26.4321	0.0571759	0.241574	0.58114	0.912933
chr1	11681315	11681559	19.5636	-0.00820168	0.261196	0.941067	0.992733	19.5636	-0.0163675	0.235437	0.855384	0.971199	19.5636	-0.0113761	0.255887	0.91442	0.985924
chr1	117059690	117059952	14.3331	0.255399	0.474792	0.1091	0.517179	14.3331	0.634442	0.772491	0.0131185	0.168717	14.3331	0.118022	0.347733	0.360889	0.80067
chr1	117121884	117122140	15.5601	-0.0927361	0.310045	0.438848	0.852357	15.5601	0.0268853	0.248028	0.766528	0.95223	15.5601	0.142972	0.359093	0.285729	0.743574
chr1	117358262	117358660	35.5035	0.154294	0.271297	0.223082	0.692948	35.5035	0.219354	0.314252	0.0792558	0.461519	35.5035	0.0516764	0.214035	0.594028	0.917697
chr1	11736221	11736470	19.4505	0.0483197	0.265871	0.669096	0.936602	19.4505	-0.0273744	0.237547	0.762099	0.951225	19.4505	-0.0839354	0.287248	0.465626	0.860791
chr1	117366351	117366706	23.6973	0.0707113	0.262567	0.53919	0.896083	23.6973	0.0798415	0.247957	0.409052	0.825681	23.6973	0.0210792	0.235925	0.835304	0.974908
chr1	117366844	117367295	66.2966	0.198409	0.238225	0.125041	0.550695	66.2966	-0.0569465	0.18663	0.557674	0.891406	66.2966	-0.337917	0.34006	0.0340804	0.251163
chr1	11736731	11736901	7.81147	-0.0348472	0.33127	0.759193	0.9601	7.81147	-0.0305467	0.300798	0.743974	0.947037	7.81147	-0.00215091	0.339032	0.985744	0.997959
chr1	117367537	117367717	14.2854	0.0697519	0.29915	0.548769	0.90032	14.2854	-0.00439926	0.253954	0.960959	0.990689	14.2854	-0.0774118	0.310285	0.515908	0.886473
chr1	117929369	117929539	14.6641	0.0641586	0.292175	0.578311	0.911972	14.6641	-0.0511566	0.268412	0.584479	0.899844	14.6641	-0.149847	0.368185	0.271466	0.73157
chr1	117930003	117930222	11.0535	0.221038	0.445383	0.141561	0.580022	11.0535	0.132948	0.367171	0.238558	0.703217	11.0535	-0.0352983	0.301501	0.7599	0.956859
chr1	11805175	11805885	67.8443	0.116336	0.206808	0.328652	0.785782	67.8443	0.123352	0.197322	0.232853	0.696991	67.8443	0.0177169	0.165369	0.833415	0.974501
chr1	11806164	11807004	65.4213	0.1604	0.218865	0.194688	0.659779	65.4213	-0.0420891	0.181467	0.663903	0.926049	65.4213	-0.221627	0.276985	0.0834703	0.42481
chr1	11907929	11908138	34.6811	0.0259149	0.230638	0.816821	0.972341	34.6811	0.082218	0.225484	0.396984	0.817716	34.6811	0.0617027	0.228533	0.540415	0.896957
chr1	11908447	11908972	57.8232	-0.00397824	0.200156	0.97204	0.99744	57.8232	0.0988188	0.1962	0.325578	0.776011	57.8232	0.100696	0.211192	0.310616	0.766279
chr1	11909050	11909831	81.5916	0.00412364	0.184655	0.97124	0.997401	81.5916	0.0948999	0.178087	0.348147	0.7895	81.5916	0.0811083	0.178964	0.368959	0.806409
chr1	11909963	11910151	16.1056	-0.0611147	0.28913	0.595066	0.918601	16.1056	0.00497245	0.243592	0.955724	0.988712	16.1056	0.0681466	0.296741	0.556979	0.902817
chr1	119140302	119140659	30.1834	0.0648563	0.248006	0.570574	0.910242	30.1834	0.211172	0.331587	0.0915423	0.492109	30.1834	0.133007	0.287028	0.263937	0.723751
chr1	119140863	119141455	43.0589	-0.0385609	0.21499	0.733622	0.953499	43.0589	-0.035752	0.19575	0.704088	0.937164	43.0589	-0.00335487	0.191232	0.970415	0.996079
chr1	11926623	11927010	22.025	-0.188111	0.342378	0.171559	0.627219	22.025	0.00275338	0.221537	0.975548	0.993951	22.025	0.202289	0.373761	0.161709	0.594562
chr1	11927690	11928370	30.3671	-0.028751	0.246054	0.796702	0.968211	30.3671	1.27906	0.61551	0.000475143	0.0176874	30.3671	1.43479	0.537299	0.000209933	0.00650978
chr1	11933842	11934500	50.8726	-0.14563	0.235248	0.23736	0.707267	50.8726	0.00219101	0.185802	0.98154	0.995746	50.8726	0.132285	0.243563	0.227314	0.683681
chr1	11934662	11934954	22.001	0.123328	0.300083	0.3193	0.777905	22.001	0.146346	0.310983	0.189136	0.654962	22.001	0.0326089	0.246272	0.753823	0.954787
chr1	11979514	11979776	10.606	0.0244467	0.302795	0.828072	0.975573	10.606	0.0137913	0.270929	0.879435	0.976985	10.606	-0.00767742	0.303663	0.946928	0.992238
chr1	11980477	11981056	47.4876	0.110913	0.226699	0.351599	0.800651	47.4876	0.0303457	0.192633	0.74756	0.947787	47.4876	-0.0575963	0.2	0.539487	0.896175
chr1	12001885	12002131	5.9267	-0.206523	0.510587	0.144931	NA	5.9267	-0.0538473	0.345781	0.581556	0.899199	5.9267	0.129415	0.460281	0.349124	0.793881
chr1	120069075	120069245	9.2714	0.0500256	0.322257	0.66335	0.935089	9.2714	0.00426117	0.282078	0.962804	0.99107	9.2714	-0.0470169	0.329132	0.696301	0.942936
chr1	120176585	120176838	12.5266	-0.0937421	0.318098	0.435828	0.851541	12.5266	-0.195035	0.415636	0.130841	0.571695	12.5266	-0.0915774	0.337252	0.463366	0.859938
chr1	12019844	12020006	12.9777	0.115715	0.340938	0.353672	0.802264	12.9777	0.179927	0.397481	0.14863	0.601753	12.9777	0.0603255	0.300832	0.604285	0.920615
chr1	120415086	120415356	11.7013	-0.137383	0.365354	0.289302	0.750799	11.7013	-0.037847	0.270568	0.681902	0.932092	11.7013	0.0815191	0.336027	0.51033	0.884805
chr1	120415588	120416074	18.2292	-0.145747	0.339858	0.262018	0.728453	18.2292	0.00270459	0.238639	0.975885	0.994079	18.2292	0.157771	0.36501	0.248783	0.708895
chr1	12051839	12052068	9.36557	-0.129589	0.380666	0.312913	0.772668	9.36557	-0.02852	0.282888	0.757436	0.949853	9.36557	0.0910585	0.365168	0.479081	0.869824
chr1	120724058	120724367	14.2052	0.185725	0.379694	0.184144	0.64454	14.2052	-0.0240435	0.259422	0.79114	0.955057	14.2052	-0.271341	0.470255	0.111975	0.496733
chr1	120850568	120850738	3.80265	-0.0736224	0.410968	0.516163	NA	3.80265	-0.0251613	0.35512	0.789997	NA	3.80265	0.0484508	0.423244	0.697441	NA
chr1	12153713	12153942	8.12979	-0.0192145	0.341497	0.864496	0.982421	8.12979	0.21839	0.492939	0.114642	0.54203	8.12979	0.330178	0.589627	0.0839678	0.425892
chr1	1215878	1216177	8.15885	-0.032732	0.327314	0.773069	0.963361	8.15885	-0.0587695	0.31803	0.545776	0.886302	8.15885	-0.0382547	0.345845	0.754098	0.954787
chr1	12161050	12161905	44.5877	-1.73384	0.506393	2.13235e-05	0.00116009	44.5877	0.460929	0.428057	0.0105421	0.148019	44.5877	2.68568	0.466851	1.70145e-10	3.70786e-08
chr1	12162159	12162921	31.3347	-1.48855	0.674786	0.000325228	0.0104726	31.3347	0.283905	0.376887	0.0471076	0.356581	31.3347	2.46539	0.546876	1.42225e-07	1.42593e-05
chr1	12167061	12167639	37.2628	-0.0907727	0.239877	0.438042	0.852289	37.2628	0.124737	0.236248	0.2292	0.694506	37.2628	0.33765	0.401967	0.049523	0.314194
chr1	12185800	12185970	5.00255	-0.0455009	0.396594	0.679837	NA	5.00255	0.203381	0.523839	0.126221	0.565416	5.00255	0.358895	0.673412	0.0608431	0.355685
chr1	12230128	12230550	23.9155	0.0174873	0.245991	0.874977	0.984721	23.9155	-0.0219309	0.223176	0.808274	0.959366	23.9155	-0.0413668	0.243895	0.6898	0.94179
chr1	1230119	1230333	7.33257	-0.112865	0.389532	0.365438	0.810633	7.33257	-0.0486131	0.316763	0.612636	0.910078	7.33257	0.0508939	0.366042	0.683484	0.941054
chr1	1230443	1230723	14.9273	0.0160605	0.273005	0.885317	0.986824	14.9273	-0.10776	0.309351	0.301574	0.758005	14.9273	-0.163758	0.378167	0.241156	0.699343
chr1	1230930	1232008	129.028	0.129803	0.171312	0.266807	0.732762	129.028	0.0865697	0.157347	0.392109	0.816075	129.028	-0.0198917	0.134519	0.794433	0.965893
chr1	1236446	1236665	8.37691	-0.048166	0.326553	0.674836	0.938069	8.37691	-0.0902503	0.340947	0.382054	0.810053	8.37691	-0.0559227	0.348622	0.650773	0.933252
chr1	1237137	1237468	17.8859	0.0252438	0.262778	0.820875	0.973158	17.8859	-0.285127	0.473597	0.0628259	0.41261	17.8859	-0.463806	0.582283	0.0379966	0.268916
chr1	1237727	1238256	29.6586	0.0452216	0.235839	0.688481	0.941741	29.6586	-0.381641	0.47558	0.0274096	0.26638	29.6586	-0.708695	0.582652	0.00959284	0.11039
chr1	1238418	1238803	17.7303	-0.0770579	0.281058	0.50823	0.884516	17.7303	-0.291219	0.471537	0.0592475	0.402111	17.7303	-0.172865	0.375489	0.218822	0.673828
chr1	1239483	1239746	13.9636	0.292468	0.479451	0.082496	0.451625	13.9636	-0.00240487	0.262773	0.978744	0.994899	13.9636	-0.33673	0.527634	0.0769421	0.406207
chr1	1241150	1241517	17.3259	0.656706	0.663208	0.0119253	0.143772	17.3259	-0.358753	0.594634	0.0448403	0.34787	17.3259	-2.20113	0.739251	2.41414e-05	0.00112234
chr1	1243744	1244057	7.85481	-0.0315373	0.328675	0.780992	0.965473	7.85481	-0.0927949	0.354535	0.373853	0.805762	7.85481	-0.0780571	0.373293	0.542021	0.897961
chr1	1245707	1245897	9.69168	-0.0526436	0.319253	0.647467	0.930409	9.69168	-0.188714	0.445772	0.144568	0.594638	9.69168	-0.140829	0.4092	0.314459	0.768909
chr1	12464379	12464562	7.03448	0.184713	0.499612	0.17061	0.626316	7.03448	0.759974	0.99264	0.00601791	0.102357	7.03448	0.28526	0.56361	0.110058	0.492689
chr1	1247381	1248054	24.1854	0.0398907	0.24569	0.72234	0.951459	24.1854	-0.170277	0.322214	0.144774	0.595003	24.1854	-0.318133	0.447656	0.0713522	0.389697
chr1	12477510	12478058	23.9366	0.408141	0.564784	0.0408403	0.309045	23.9366	2.59921	0.611592	7.39144e-07	0.000108897	23.9366	1.27063	0.668932	0.00112479	0.024116
chr1	12478169	12478323	8.81528	0.141282	0.42054	0.278136	0.743397	8.81528	0.630548	0.8478	0.0130649	0.168166	8.81528	0.249794	0.506828	0.139172	0.55402
chr1	12478826	12479458	21.5087	0.00749797	0.285404	0.946392	0.993566	21.5087	1.97418	0.677391	5.93211e-05	0.00359374	21.5087	1.84435	0.661667	8.48793e-05	0.00311046
chr1	12481179	12481427	9.34528	-0.132469	0.426863	0.298232	0.758353	9.34528	0.620282	0.807941	0.0140474	0.175837	9.34528	1.34006	1.02262	0.00131734	0.0268264
chr1	1260780	1260950	3.88242	0.0159507	0.380293	0.884314	NA	3.88242	-0.0584797	0.385533	0.549908	NA	3.88242	-0.0965192	0.451634	0.460154	NA
chr1	12616611	12616790	11.9572	0.125281	0.358919	0.324405	0.782294	11.9572	0.247038	0.479311	0.0886712	0.485025	11.9572	0.0894077	0.328609	0.468308	0.862592
chr1	12616906	12617206	21.8377	0.0743894	0.277615	0.521437	0.890614	21.8377	0.392032	0.521054	0.0297998	0.277796	21.8377	0.237222	0.398777	0.124213	0.523142
chr1	12617366	12617605	14.7388	0.221643	0.429215	0.139495	0.576914	14.7388	0.332728	0.547006	0.0500081	0.368295	14.7388	0.0562655	0.293676	0.624168	0.925203
chr1	12617810	12618344	40.9329	0.107145	0.24135	0.367774	0.812252	40.9329	0.141644	0.247732	0.185057	0.650213	40.9329	0.039579	0.204472	0.674543	0.939814
chr1	12618473	12618977	46.9845	0.103114	0.230394	0.383416	0.822444	46.9845	0.0886151	0.210703	0.368222	0.802067	46.9845	0.00210249	0.188824	0.981334	0.99728
chr1	12619009	12619554	37.1255	0.794877	0.552636	0.00346604	0.0619612	37.1255	0.388129	0.442278	0.0223384	0.236573	37.1255	-0.066149	0.21902	0.503059	0.881337
chr1	1273411	1273817	31.3213	0.120974	0.262365	0.319316	0.777905	31.3213	0.0234187	0.211048	0.797659	0.956093	31.3213	-0.0778542	0.241874	0.457163	0.856729
chr1	1274002	1274652	64.9342	0.041714	0.198466	0.715508	0.949841	64.9342	0.132317	0.203881	0.205318	0.672245	64.9342	0.08491	0.196391	0.369699	0.80641
chr1	1305722	1305912	11.4137	0.0224304	0.297871	0.841729	0.978442	11.4137	-0.415976	0.668805	0.0338807	0.298991	11.4137	-0.613244	0.752465	0.0213486	0.188493
chr1	1307244	1307844	28.8659	0.117292	0.276772	0.334994	0.790165	28.8659	-0.263582	0.411859	0.0652111	0.419325	28.8659	-0.878135	0.643893	0.00541494	0.0745291
chr1	1308118	1308418	26.1348	0.0494074	0.253588	0.661854	0.93501	26.1348	0.0628781	0.236769	0.504296	0.869153	26.1348	0.0230568	0.235479	0.819971	0.971298
chr1	1308652	1309273	48.9146	0.139208	0.23576	0.255936	0.723632	48.9146	0.0982648	0.208289	0.325299	0.775759	48.9146	-0.0140482	0.182922	0.873867	0.979702
chr1	1318037	1318285	7.9667	-0.264143	0.528894	0.0996407	0.496187	7.9667	-0.169119	0.443198	0.173777	0.638096	7.9667	0.0392536	0.368016	0.751812	0.954401
chr1	1324268	1324585	27.5152	0.0457541	0.243449	0.684756	0.940382	27.5152	0.0878383	0.239569	0.369306	0.80302	27.5152	0.0495301	0.233518	0.625489	0.925565
chr1	1324861	1325345	34.7973	0.0687869	0.24103	0.548801	0.90032	34.7973	-0.0214994	0.210872	0.813743	0.960221	34.7973	-0.0900251	0.25199	0.403522	0.825457
chr1	1343623	1344961	88.0456	-0.594688	0.341494	0.0019532	0.0411102	88.0456	-0.187075	0.19903	0.0905132	0.489217	88.0456	0.152418	0.218672	0.151286	0.576575
chr1	1345166	1347028	121.015	-0.363616	0.240044	0.0114181	0.139328	121.015	-0.327269	0.235053	0.0111361	0.152537	121.015	0.000701323	0.141732	0.992838	0.998424
chr1	1347329	1349101	136.08	-0.0501096	0.161828	0.659291	0.93452	136.08	-0.119943	0.158861	0.242929	0.707178	136.08	-0.0577483	0.143742	0.470679	0.864287
chr1	1349585	1349993	45.7651	0.111441	0.229786	0.349803	0.799761	45.7651	0.00693017	0.19306	0.940811	0.986249	45.7651	-0.0865553	0.220165	0.388063	0.816262
chr1	1351379	1351565	9.9428	0.022541	0.307737	0.841344	0.978442	9.9428	-0.0148699	0.27818	0.870733	0.974788	9.9428	-0.0432608	0.322812	0.716976	0.947116
chr1	1356675	1357089	11.0386	-0.0179405	0.298287	0.872921	0.984485	11.0386	-0.194148	0.440667	0.13658	0.581641	11.0386	-0.207998	0.457752	0.184344	0.629462
chr1	1358427	1359788	73.3373	-0.0099457	0.188489	0.930642	0.991964	73.3373	-0.00939721	0.173291	0.922961	0.983772	73.3373	-0.000751786	0.160386	0.992762	0.998424
chr1	1359911	1360669	50.2686	-0.0501535	0.212903	0.660159	0.934666	50.2686	-0.0146372	0.190249	0.87629	0.97614	50.2686	0.025789	0.189602	0.775212	0.960059
chr1	13699656	13699914	8.43843	-0.0466494	0.331961	0.684263	0.940024	8.43843	-0.032222	0.297122	0.730221	0.943472	8.43843	0.0077331	0.334804	0.948584	0.992714
chr1	1374617	1375205	56.5481	0.0236404	0.202711	0.835147	0.976933	56.5481	0.18159	0.23527	0.10618	0.523547	56.5481	0.160027	0.250828	0.161399	0.594045
chr1	13748986	13749171	13.1456	0.38801	0.58348	0.0465634	0.332406	13.1456	0.395069	0.625387	0.0370363	0.312849	13.1456	0.0103751	0.287824	0.926511	0.988378
chr1	13749469	13749956	32.6665	0.177189	0.290525	0.177708	0.637177	32.6665	0.0508096	0.215527	0.58626	0.900466	32.6665	-0.0854366	0.242636	0.41738	0.833901
chr1	1375616	1376005	34.5583	0.0870349	0.244861	0.455726	0.861121	34.5583	0.110092	0.240888	0.277817	0.739853	34.5583	0.0322348	0.213117	0.737424	0.951604
chr1	1398713	1399289	50.459	0.157838	0.239444	0.206418	0.674045	50.459	0.0777133	0.199123	0.42699	0.833652	50.459	-0.0430573	0.188233	0.634068	0.927858
chr1	1399554	1400421	73.71	0.0873393	0.197489	0.454753	0.860946	73.71	0.0555174	0.178839	0.571405	0.896473	73.71	-0.01549	0.162933	0.85301	0.977526
chr1	1406638	1407195	42.334	0.139695	0.254529	0.258355	0.724667	42.334	0.139972	0.246358	0.188918	0.654643	42.334	0.0163682	0.19698	0.858728	0.977946
chr1	1407430	1407883	38.8455	0.153266	0.25944	0.222711	0.692512	38.8455	0.0870444	0.217191	0.374437	0.806205	38.8455	-0.031458	0.200206	0.735192	0.951148
chr1	1426395	1426604	10.6377	0.0876565	0.330724	0.464655	0.865663	10.6377	-0.163785	0.417272	0.180036	0.643698	10.6377	-0.464764	0.660516	0.0414716	0.282427
chr1	1427602	1427939	28.2181	0.170972	0.296	0.191728	0.655179	28.2181	-0.174637	0.315513	0.135707	0.5798	28.2181	-0.831342	0.601923	0.00564418	0.0767418
chr1	1430099	1430362	9.70709	-0.01456	0.304953	0.896784	0.988799	9.70709	-0.063828	0.304124	0.511117	0.8718	9.70709	-0.0644124	0.336723	0.599357	0.919476
chr1	1430585	1430822	16.3426	0.070703	0.285319	0.541804	0.897181	16.3426	-0.123059	0.321725	0.254009	0.718868	16.3426	-0.319652	0.498343	0.0819031	0.419762
chr1	1431658	1432052	20.6893	0.0548022	0.262621	0.629384	0.926436	20.6893	-0.0309946	0.234245	0.732571	0.94379	20.6893	-0.0958069	0.289539	0.410175	0.829508
chr1	1432941	1433086	8.84324	0.0670711	0.341424	0.566987	0.909238	8.84324	0.0650318	0.318404	0.507505	0.870417	8.84324	0.0103646	0.324661	0.930378	0.989136
chr1	1433445	1433933	29.9362	0.0175897	0.234857	0.874552	0.984574	29.9362	0.0522735	0.218848	0.575364	0.896916	29.9362	0.0396504	0.225162	0.689403	0.94179
chr1	1441073	1441462	21.0497	0.0691794	0.275458	0.548719	0.90032	21.0497	-0.202507	0.390149	0.115609	0.544163	21.0497	-0.502838	0.594032	0.0310732	0.237137
chr1	144461423	144461615	12.3148	-0.0318215	0.29883	0.777968	0.964337	12.3148	0.0439668	0.272158	0.636335	0.917138	12.3148	0.0939695	0.337186	0.452504	0.854562
chr1	145425405	145425665	13.1819	-0.0375333	0.295996	0.740088	0.955463	13.1819	0.0168801	0.258894	0.851892	0.970093	13.1819	0.0612488	0.310467	0.604373	0.920627
chr1	145823659	145824539	65.5039	0.150104	0.222302	0.22209	0.691487	65.5039	0.2213	0.250869	0.0634929	0.414063	65.5039	0.0561581	0.181026	0.529325	0.891325
chr1	145845654	145846259	45.1016	0.140439	0.239593	0.253085	0.721551	45.1016	0.00831745	0.192795	0.929044	0.984358	45.1016	-0.111884	0.235668	0.290433	0.74859
chr1	145858753	145858929	8.83069	-0.037229	0.322849	0.743559	0.956615	8.83069	-0.0957697	0.348355	0.359891	0.797636	8.83069	-0.0742534	0.36075	0.556969	0.902817
chr1	145859187	145859748	41.819	-0.0064794	0.213729	0.954047	0.994214	41.819	-0.18951	0.276678	0.104168	0.519203	41.819	-0.210907	0.317419	0.118313	0.509757
chr1	145892174	145892610	19.8188	-0.804604	0.698178	0.00635004	0.093528	19.8188	-0.0749259	0.250907	0.435273	0.836271	19.8188	0.423533	0.552793	0.0454521	0.299021
chr1	145918638	145919004	38.7129	-0.0809106	0.231557	0.485447	0.875164	38.7129	0.0540435	0.203082	0.568606	0.895289	38.7129	0.149994	0.276474	0.206169	0.657863
chr1	145919120	145919530	34.4101	0.0263347	0.224641	0.814411	0.971988	34.4101	-0.0605224	0.213876	0.522344	0.876908	34.4101	-0.0927895	0.244989	0.383104	0.813904
chr1	145919736	145919922	7.92594	-0.0719129	0.343086	0.541674	0.897181	7.92594	-0.159474	0.426268	0.189271	0.655018	7.92594	-0.0921631	0.382834	0.480018	0.87021
chr1	145927631	145928139	52.622	0.00708272	0.207146	0.950008	0.993887	52.622	0.0873864	0.201165	0.376671	0.806763	52.622	0.0793912	0.208403	0.413432	0.831821
chr1	145928851	145929040	5.6277	-0.115398	0.413993	0.351333	NA	5.6277	-0.0371977	0.329115	0.696474	0.935527	5.6277	0.071009	0.401814	0.580514	0.91244
chr1	145957006	145957402	18.6739	-0.0591858	0.279663	0.605051	0.92079	18.6739	-0.0675066	0.263615	0.479115	0.859381	18.6739	-0.0203304	0.268258	0.851554	0.977526
chr1	145957563	145958010	62.7766	-0.065062	0.203196	0.572862	0.910994	62.7766	-0.0990975	0.197094	0.324154	0.775272	62.7766	-0.0369126	0.180524	0.676222	0.94021
chr1	145963914	145964478	49.1683	0.239209	0.278959	0.0850104	0.459135	49.1683	-0.110586	0.217101	0.275592	0.737269	49.1683	-0.693623	0.46041	0.00511756	0.0716923
chr1	145964742	145964950	12.2365	0.000747327	0.294447	0.994663	0.999149	12.2365	0.0868843	0.303633	0.387097	0.813683	12.2365	0.109348	0.346784	0.393324	0.819656
chr1	145978747	145979429	49.6049	-0.0044042	0.208536	0.968865	0.996677	49.6049	-0.107662	0.214942	0.28661	0.746734	49.6049	-0.107305	0.233404	0.306441	0.763298
chr1	145979787	145980198	26.2094	-0.179821	0.30832	0.177544	0.637085	26.2094	-0.434489	0.511338	0.0206489	0.22454	26.2094	-0.114178	0.289316	0.332251	0.782812
chr1	145985233	145985676	20.4485	-0.251183	0.393912	0.10183	0.500783	20.4485	-0.180455	0.341472	0.13347	0.576203	20.4485	0.0159713	0.254334	0.879729	0.98093
chr1	145991630	145991940	7.76986	-0.183133	0.439616	0.193175	0.657308	7.76986	-0.254938	0.536207	0.0874862	0.482516	7.76986	-0.0516849	0.365435	0.678876	0.940833
chr1	145992573	145992819	7.72101	-0.0214952	0.327258	0.848926	0.979964	7.72101	-0.140609	0.414209	0.22769	0.693165	7.72101	-0.144426	0.433282	0.309544	0.765347
chr1	145993159	145993595	15.5639	-0.190129	0.378397	0.176369	0.635096	15.5639	-0.149067	0.342956	0.192226	0.658668	15.5639	0.00663631	0.278852	0.952197	0.992975
chr1	145996212	145996448	16.962	0.109817	0.309742	0.369227	0.812833	16.962	0.030148	0.248151	0.739813	0.945652	16.962	-0.0647742	0.284782	0.568053	0.907502
chr1	145996844	145997192	24.2945	0.00436664	0.244918	0.968592	0.996677	24.2945	0.0706191	0.23702	0.458396	0.847571	24.2945	0.0757221	0.258587	0.484713	0.872309
chr1	146034653	146035555	59.1849	-0.0657565	0.201266	0.569114	0.909934	59.1849	-0.213081	0.251507	0.0713439	0.437457	59.1849	-0.131511	0.232535	0.219218	0.674421
chr1	146035842	146036166	23.644	-0.0163592	0.245571	0.882952	0.986499	23.644	-0.067568	0.240046	0.476061	0.858388	23.644	-0.0601156	0.255158	0.573691	0.909748
chr1	146037205	146037937	62.6058	-0.0544215	0.198188	0.63607	0.927719	62.6058	-0.083827	0.188939	0.398879	0.818868	62.6058	-0.0317772	0.174527	0.714232	0.945892
chr1	146038106	146039360	123.696	-0.144827	0.174925	0.219691	0.689164	123.696	-0.112319	0.161328	0.273061	0.735225	123.696	0.0107048	0.136771	0.889214	0.982293
chr1	146377005	146377581	36.5555	-0.34549	0.384826	0.0403819	0.306886	36.5555	-0.151327	0.257108	0.164776	0.625932	36.5555	0.0694407	0.231493	0.495393	0.878008
chr1	146377795	146377969	10.3335	-0.0197163	0.309515	0.860912	0.981302	10.3335	-0.0427299	0.291245	0.649338	0.921448	10.3335	-0.033064	0.323557	0.781182	0.961754
chr1	146386766	146387039	24.0622	0.0784845	0.261307	0.498674	0.880211	24.0622	0.055843	0.232035	0.549463	0.888067	24.0622	-0.0081789	0.229849	0.934711	0.990082
chr1	146387235	146387453	12.2112	0.00582271	0.291922	0.958423	0.995364	12.2112	0.0528593	0.276316	0.574514	0.896916	12.2112	0.059697	0.309211	0.61264	0.922649
chr1	1471283	1471597	23.6644	0.340177	0.446996	0.0526958	0.356991	23.6644	0.250197	0.398276	0.0718111	0.438681	23.6644	-0.0149616	0.230521	0.881125	0.98093
chr1	147172026	147172483	40.178	0.140398	0.246474	0.254618	0.722344	40.178	-0.181435	0.278135	0.115827	0.544749	40.178	-0.687578	0.502583	0.00709494	0.0893444
chr1	147172809	147173069	30.3908	0.122479	0.260783	0.313855	0.773601	30.3908	-0.0659392	0.224641	0.486628	0.862146	30.3908	-0.263531	0.379591	0.0894936	0.442198
chr1	1471804	1472014	16.8648	0.0723193	0.288505	0.533708	0.89426	16.8648	0.0529075	0.256891	0.570471	0.896297	16.8648	-0.00627619	0.262358	0.953334	0.99318
chr1	1472184	1472361	10.193	0.0170876	0.300431	0.87895	0.985688	10.193	-0.0964222	0.333072	0.353234	0.793365	10.193	-0.15226	0.404508	0.281743	0.739504
chr1	147242704	147243097	54.2219	0.157232	0.233864	0.206505	0.674071	54.2219	0.00755995	0.186555	0.936299	0.985585	54.2219	-0.126926	0.233929	0.235015	0.691804
chr1	1472741	1473274	25.6467	0.0399835	0.242922	0.721808	0.951459	25.6467	-0.0862218	0.246223	0.377353	0.806861	25.6467	-0.159365	0.321609	0.216879	0.672042
chr1	147423358	147423566	10.4189	0.0124485	0.303005	0.911601	0.990224	10.4189	0.022416	0.274007	0.806392	0.958755	10.4189	0.0153982	0.306637	0.894329	0.982494
chr1	147540657	147540854	13.4508	0.201462	0.405859	0.163285	0.614869	13.4508	0.125558	0.338433	0.251505	0.715807	13.4508	-0.0288273	0.281718	0.796114	0.966043
chr1	147541451	147541733	15.0421	0.0704085	0.294675	0.544657	0.898194	15.0421	0.0512218	0.262403	0.582906	0.89953	15.0421	-0.00655555	0.270225	0.95201	0.992975
chr1	147600237	147600439	13.181	-0.0769237	0.310824	0.513312	0.887252	13.181	0.00782534	0.25333	0.930635	0.984708	13.181	0.0915724	0.328541	0.458221	0.857193
chr1	148334787	148334980	14.2886	0.0583842	0.29416	0.611331	0.922229	14.2886	0.0627668	0.273591	0.509763	0.871283	14.2886	0.0163409	0.276773	0.882289	0.981165
chr1	148388581	148388867	22.9253	-0.00451776	0.248705	0.967493	0.996582	22.9253	-0.0182554	0.224955	0.839452	0.967626	22.9253	-0.0164792	0.240406	0.872126	0.979605
chr1	148975614	148975805	4.95605	-0.286118	0.599763	0.0682791	NA	4.95605	-0.294256	0.644927	0.0583249	0.399204	4.95605	-0.00683726	0.423221	0.955096	0.993341
chr1	148976021	148976232	4.76713	-0.375349	0.692229	0.0296824	NA	4.76713	-0.573362	0.929428	0.00788007	0.12199	4.76713	-0.0690618	0.471581	0.565232	0.90719
chr1	149103439	149103584	10.5599	-0.0325271	0.308992	0.773831	0.963361	10.5599	0.0606726	0.291311	0.527197	0.878169	10.5599	0.121536	0.370437	0.360588	0.800539
chr1	149390657	149390870	12.9172	0.0813485	0.30832	0.491134	0.878357	12.9172	-0.04389	0.271523	0.636774	0.917138	12.9172	-0.1634	0.388323	0.247045	0.707025
chr1	149636516	149636728	13.9279	0.00755865	0.278803	0.945864	0.993536	13.9279	-0.0223091	0.253898	0.805204	0.95856	13.9279	-0.0352885	0.285943	0.753911	0.954787
chr1	149813045	149813582	30.733	-0.0245687	0.231652	0.826031	0.974925	30.733	0.00984405	0.207108	0.914056	0.982252	30.733	0.031943	0.218656	0.743126	0.953433
chr1	149843443	149843938	19.4199	-0.0198615	0.262676	0.858327	0.981207	19.4199	-0.0222149	0.236719	0.805246	0.95856	19.4199	-0.0070626	0.256069	0.946814	0.992238
chr1	149849888	149850099	14.6219	-0.0184044	0.277011	0.868937	0.983487	14.6219	-0.108895	0.313043	0.29855	0.755854	14.6219	-0.110358	0.33658	0.383103	0.813904
chr1	149885258	149885570	21.4955	0.0536838	0.266836	0.636362	0.927753	21.4955	0.0817459	0.259823	0.401	0.819956	21.4955	0.0385401	0.253806	0.715725	0.946727
chr1	149885721	149886684	82.3573	-0.0937942	0.191888	0.423267	0.846507	82.3573	-0.0229959	0.170245	0.814329	0.960402	82.3573	0.0485898	0.166573	0.569535	0.907885
chr1	149886966	149888521	156.922	-0.151699	0.163445	0.191057	0.654379	156.922	-0.0657703	0.146851	0.510706	0.871526	156.922	0.0507701	0.135096	0.511606	0.885035
chr1	149888605	149889328	70.1837	0.143718	0.214053	0.238022	0.708208	70.1837	-0.0120375	0.178896	0.900392	0.979383	70.1837	-0.139601	0.227622	0.191187	0.638948
chr1	149927500	149928344	77.3983	0.282055	0.256567	0.0445988	0.32552	77.3983	0.143528	0.198239	0.174723	0.63893	77.3983	-0.0576406	0.170754	0.507031	0.883643
chr1	149936517	149936864	10.6139	-0.20938	0.447307	0.155726	0.604092	10.6139	-0.0468181	0.286809	0.618855	0.912393	10.6139	0.127982	0.391927	0.347919	0.793416
chr1	149937016	149937394	27.7101	-0.25299	0.369108	0.0947143	0.48514	27.7101	0.0451559	0.217654	0.625819	0.914307	27.7101	0.455812	0.507715	0.0316758	0.240333
chr1	149937643	149938180	25.9595	-0.162836	0.304364	0.211561	0.680082	25.9595	-0.0357374	0.218597	0.696555	0.935527	25.9595	0.0981572	0.27401	0.3859	0.815122
chr1	149938481	149939146	29.493	-0.232162	0.344589	0.110111	0.519435	29.493	-0.0497545	0.218384	0.592882	0.902334	29.493	0.128454	0.291785	0.282824	0.740986
chr1	149939306	149940241	66.0507	-0.439771	0.343289	0.0115882	0.140664	66.0507	-0.0592433	0.179456	0.546566	0.886764	66.0507	0.277937	0.309797	0.0526736	0.325769
chr1	150009901	150010742	75.5742	0.185333	0.219934	0.141604	0.580065	75.5742	0.0550544	0.177939	0.574972	0.896916	75.5742	-0.084562	0.186669	0.359852	0.800127
chr1	150010860	150011136	31.4935	0.0481966	0.23617	0.669739	0.937024	31.4935	0.0444968	0.214201	0.631502	0.915715	31.4935	0.00482386	0.212634	0.959795	0.994256
chr1	150066722	150067657	91.9655	0.0596558	0.185577	0.605415	0.920833	91.9655	0.0803516	0.174725	0.422838	0.832648	91.9655	0.0230153	0.155311	0.778529	0.961129
chr1	150067914	150068197	18.3339	0.514907	0.59451	0.0223427	0.213766	18.3339	0.0638138	0.267776	0.502062	0.868008	18.3339	-0.279263	0.450954	0.099925	0.468469
chr1	150150641	150150790	7.11412	0.0777665	0.379601	0.509457	0.884966	7.11412	0.258802	0.560793	0.0845188	0.476259	7.11412	0.158094	0.445123	0.276848	0.73601
chr1	150234406	150234670	19.0984	0.00112375	0.25877	0.991912	0.999149	19.0984	-0.00048887	0.23179	0.995641	0.99927	19.0984	-0.00163551	0.251252	0.987547	0.998277
chr1	150234782	150235999	147.565	0.0704917	0.164093	0.537374	0.895573	147.565	0.287697	0.200336	0.0158118	0.188665	147.565	0.189188	0.198418	0.0736192	0.396853
chr1	150236405	150236745	18.9614	-0.0982429	0.302412	0.413806	0.841687	18.9614	0.0792096	0.264876	0.414837	0.829184	18.9614	0.273627	0.45146	0.104939	0.480476
chr1	150236770	150236953	9.07708	-0.134579	0.394526	0.298629	0.758783	9.07708	0.0269029	0.285125	0.770869	0.952687	9.07708	0.208656	0.475035	0.186204	0.631696
chr1	150255777	150255950	14.718	0.0632857	0.291913	0.58315	0.91364	14.718	0.0163832	0.250796	0.85566	0.971199	14.718	-0.0414001	0.282861	0.71197	0.945293
chr1	150268635	150268950	30.5377	0.154199	0.280754	0.225722	0.696038	30.5377	0.0323411	0.213048	0.724532	0.942009	30.5377	-0.0934856	0.252135	0.386898	0.815836
chr1	150293407	150293758	24.4708	-0.00660988	0.242994	0.952496	0.99408	24.4708	-0.00656864	0.218304	0.941868	0.986315	24.4708	-0.0012904	0.230529	0.989703	0.998277
chr1	150321151	150321406	23.8406	0.0260572	0.247741	0.815152	0.971988	23.8406	0.0759396	0.241554	0.42908	0.834383	23.8406	0.0583226	0.248687	0.579701	0.911961
chr1	150321602	150321925	28.4687	0.0196298	0.242217	0.859972	0.981207	28.4687	0.207497	0.333812	0.0960741	0.503608	28.4687	0.210523	0.352873	0.138082	0.551992
chr1	150363112	150363952	79.6291	0.0290227	0.185077	0.800134	0.969177	79.6291	0.0259742	0.170578	0.79086	0.955057	79.6291	0.000848337	0.155322	0.991706	0.998424
chr1	150364197	150365970	196.727	0.0977359	0.15265	0.38488	0.823035	196.727	0.146788	0.149443	0.152882	0.608712	196.727	0.0411136	0.125436	0.5793	0.911961
chr1	150487003	150487190	18.5532	-0.0995179	0.297146	0.407475	0.837901	18.5532	-0.0364515	0.241589	0.6893	0.932963	18.5532	0.0478695	0.273217	0.664423	0.937077
chr1	1505142	1505506	18.2657	0.00405783	0.26063	0.970808	0.997279	18.2657	-0.0539666	0.250467	0.562488	0.892578	18.2657	-0.0694183	0.282222	0.539572	0.896221
chr1	150514999	150515535	26.7093	-0.00383909	0.237875	0.972424	0.99744	26.7093	-0.0228939	0.21632	0.80105	0.957282	26.7093	-0.021485	0.227144	0.828737	0.973457
chr1	150515838	150515993	15.9591	0.0547424	0.283741	0.631545	0.926858	15.9591	0.0845772	0.279561	0.391355	0.815549	15.9591	0.0413009	0.273453	0.707792	0.944992
chr1	150532483	150532655	8.56383	-0.0751075	0.338423	0.525285	0.891296	8.56383	-0.164582	0.423897	0.179579	0.643416	8.56383	-0.0922235	0.374912	0.477415	0.869414
chr1	150536487	150536776	9.06078	0.000220096	0.313193	0.998435	0.999662	9.06078	0.00994891	0.281657	0.913362	0.982252	9.06078	0.0125615	0.320827	0.915302	0.985986
chr1	150537329	150537948	38.7917	0.0148385	0.218919	0.894773	0.988333	38.7917	0.0485072	0.202752	0.606873	0.907505	38.7917	0.0356379	0.20297	0.703937	0.944068
chr1	150538166	150538839	45.8252	-0.0563963	0.217462	0.621567	0.92472	45.8252	0.109201	0.214189	0.28089	0.74192	45.8252	0.204139	0.300085	0.117776	0.50886
chr1	150548720	150549260	49.5666	0.194446	0.260528	0.138214	0.574715	49.5666	0.186836	0.254726	0.102827	0.517112	49.5666	0.0124203	0.180808	0.887707	0.982031
chr1	150549459	150549839	22.8817	0.0788726	0.264984	0.497081	0.879893	22.8817	0.0315074	0.227004	0.728848	0.943332	22.8817	-0.0345257	0.240973	0.736983	0.951604
chr1	150560764	150561395	40.9705	0.174118	0.271648	0.178619	0.638218	40.9705	0.0901812	0.219636	0.359325	0.797456	40.9705	-0.0411209	0.204622	0.66291	0.936758
chr1	150561573	150562140	83.6724	0.0754222	0.188583	0.516055	0.888074	83.6724	0.110924	0.181941	0.278671	0.740435	83.6724	0.0356772	0.159334	0.667945	0.938197
chr1	150562311	150562755	41.1139	0.336137	0.362267	0.0401802	0.306047	41.1139	0.133367	0.240876	0.205152	0.672245	41.1139	-0.0800427	0.220552	0.423151	0.837257
chr1	150563083	150563461	21.386	1.59343	0.714046	0.000254752	0.00863692	21.386	0.585561	0.684637	0.0141655	0.1764	21.386	-0.184748	0.358665	0.184925	0.630399
chr1	150563959	150564275	12.1372	1.23267	0.896655	0.00144307	0.0329003	12.1372	0.0644218	0.320062	0.511529	0.872009	12.1372	-0.867952	0.804946	0.00807782	0.0977972
chr1	150574572	150574786	5.1613	-0.144122	0.441422	0.265124	NA	5.1613	-0.170887	0.48142	0.169544	0.63335	5.1613	-0.0324467	0.397904	0.794178	0.965893
chr1	150575415	150575652	7.56649	-0.211517	0.484341	0.149653	0.593494	7.56649	-0.206175	0.496856	0.126625	0.566525	7.56649	-0.0095307	0.36754	0.93816	0.991135
chr1	150577872	150578198	11.9826	0.00778618	0.28885	0.944389	0.992997	11.9826	-0.0453464	0.275023	0.626872	0.914463	11.9826	-0.0662507	0.316911	0.579707	0.911961
chr1	150578464	150579581	99.047	0.0712552	0.181282	0.538308	0.895836	99.047	-0.0392741	0.166963	0.691096	0.933549	99.047	-0.0920671	0.178241	0.311247	0.766437
chr1	150579789	150580371	48.2315	0.0643948	0.213568	0.575409	0.911292	48.2315	0.0286195	0.190952	0.761938	0.951202	48.2315	-0.0232119	0.185828	0.795005	0.96599
chr1	150580415	150580608	6.9172	0.0276125	0.335392	0.807213	0.970924	6.9172	-0.181234	0.481488	0.155809	0.612427	6.9172	-0.297184	0.589185	0.10002	0.468469
chr1	150605030	150605544	21.746	-1.44271	0.734063	0.000509825	0.0149041	21.746	-0.0740034	0.246275	0.439852	0.838536	21.746	0.945837	0.733382	0.00535241	0.0739279
chr1	150605769	150605939	4.48609	-0.2392	0.563297	0.0965031	NA	4.48609	-0.0713586	0.375245	0.478475	NA	4.48609	0.139757	0.493338	0.308637	NA
chr1	150613208	150613449	8.3971	-0.543267	0.735957	0.0192346	0.194581	8.3971	-0.33694	0.610142	0.0517729	0.375237	8.3971	0.0601462	0.377551	0.634242	0.927873
chr1	150629354	150629594	30.8102	0.0632423	0.237867	0.579816	0.912634	30.8102	-0.0274995	0.210851	0.764067	0.951906	30.8102	-0.0921017	0.251801	0.393208	0.819656
chr1	150629820	150630306	31.6379	0.160391	0.279956	0.210673	0.678602	31.6379	-0.0311026	0.21223	0.734611	0.944115	31.6379	-0.230511	0.353336	0.111974	0.496733
chr1	150875596	150876664	102.274	0.546726	0.318368	0.0024161	0.0480052	102.274	0.25515	0.227514	0.0345546	0.302496	102.274	-0.0828148	0.168976	0.346602	0.792434
chr1	150876936	150877490	51.0347	0.233224	0.27623	0.0905399	0.474422	51.0347	-0.0187635	0.190904	0.841845	0.968203	51.0347	-0.285768	0.339104	0.0581555	0.345378
chr1	150925286	150925982	37.2818	-0.0498273	0.223017	0.660812	0.934767	37.2818	-0.155053	0.259443	0.157475	0.61556	37.2818	-0.105076	0.249067	0.331693	0.782559
chr1	150926386	150927058	56.1607	0.145166	0.233342	0.23824	0.708208	56.1607	0.204535	0.258741	0.0818612	0.468212	56.1607	0.0504624	0.188652	0.578559	0.911961
chr1	150972767	150972954	6.98359	-0.0884425	0.367101	0.462443	0.864448	6.98359	-0.15214	0.431056	0.203901	0.671565	6.98359	-0.0687544	0.381035	0.589794	0.916164
chr1	150973079	150973255	6.52713	-0.0271503	0.349286	0.809821	0.971027	6.52713	-0.00528199	0.312479	0.954719	0.988617	6.52713	0.0227156	0.364095	0.853493	0.977526
chr1	150973405	150974394	87.535	-0.0997687	0.188112	0.395069	0.830598	87.535	-0.0223442	0.166876	0.82034	0.962241	87.535	0.0532101	0.163617	0.530922	0.892239
chr1	150974459	150975534	106.311	-0.00474532	0.172223	0.966876	0.996398	106.311	-0.0274137	0.160511	0.782214	0.953194	106.311	-0.0184468	0.144037	0.815086	0.970608
chr1	150976422	150976617	9.95608	-0.14074	0.382359	0.281843	0.745615	9.95608	-0.0314951	0.277615	0.732752	0.943884	9.95608	0.0956609	0.360674	0.457036	0.856663
chr1	150976763	150977479	49.3506	-0.185733	0.258119	0.152563	0.598947	49.3506	0.0160146	0.18772	0.865492	0.97352	49.3506	0.21047	0.300197	0.109255	0.491117
chr1	150977573	150978468	65.987	-0.576727	0.395439	0.00457433	0.0755453	65.987	-0.179748	0.223817	0.106631	0.524562	65.987	0.134559	0.233358	0.210862	0.663698
chr1	150978874	150979086	14.1052	0.0546036	0.298582	0.633961	0.927587	14.1052	0.00591015	0.258654	0.947697	0.987329	14.1052	-0.0475369	0.299256	0.680727	0.941054
chr1	150979181	150979578	37.6155	-0.12565	0.251144	0.301436	0.761224	37.6155	-0.00897769	0.198607	0.922604	0.983668	37.6155	0.100685	0.245847	0.347496	0.792901
chr1	151006587	151007001	33.6721	-0.00866593	0.226658	0.938101	0.992733	33.6721	-0.0868238	0.228701	0.374195	0.806172	33.6721	-0.0856946	0.245662	0.419075	0.835259
chr1	151007445	151008213	42.5601	-0.192521	0.268711	0.143789	0.584575	42.5601	-0.290409	0.340735	0.0377966	0.316545	42.5601	-0.0588865	0.212281	0.54313	0.898438
chr1	151008598	151008777	13.3015	0.0978829	0.323006	0.419026	0.84421	13.3015	0.0639535	0.282088	0.504554	0.869154	13.3015	-0.0162585	0.283556	0.884292	0.98157
chr1	151047480	151047663	11.3471	0.088342	0.332052	0.461707	0.864306	11.3471	0.113764	0.340007	0.289482	0.74929	11.3471	0.0371887	0.303032	0.748172	0.953782
chr1	151047815	151048604	76.4166	-0.0691325	0.192787	0.550665	0.90167	76.4166	0.10213	0.182987	0.314521	0.767316	76.4166	0.185275	0.244585	0.110302	0.492968
chr1	151059148	151059873	52.0957	-0.0396388	0.210424	0.727246	0.952124	52.0957	0.0523832	0.193116	0.584718	0.899865	52.0957	0.0890211	0.216764	0.371791	0.807666
chr1	151070099	151071661	154.291	0.0372736	0.15844	0.741501	0.95586	154.291	-0.0185441	0.148356	0.851964	0.970118	154.291	-0.0395853	0.133986	0.605547	0.920842
chr1	1511275	1511991	81.392	0.0715741	0.190717	0.537119	0.895521	81.392	0.172495	0.20429	0.114584	0.54203	81.392	0.0878354	0.183981	0.339507	0.787336
chr1	151166184	151166441	20.2954	0.0867141	0.27548	0.460338	0.863319	20.2954	-0.0284436	0.233916	0.753339	0.948601	20.2954	-0.131659	0.317406	0.292688	0.750168
chr1	151189487	151189764	14.4521	0.265168	0.454421	0.0994616	0.495944	14.4521	-0.0282519	0.267455	0.757358	0.949853	14.4521	-0.414172	0.580377	0.0510297	0.32008
chr1	151189792	151190196	27.3049	0.112871	0.26623	0.349105	0.799318	27.3049	0.0118854	0.214688	0.895497	0.978535	27.3049	-0.0878687	0.256839	0.41893	0.83523
chr1	151190335	151190637	24.8093	-0.0391947	0.248018	0.726844	0.952012	24.8093	0.0342842	0.221307	0.707459	0.938124	24.8093	0.0788176	0.260754	0.469725	0.863578
chr1	151193212	151193397	3.46335	0.0346662	0.41727	0.738818	NA	3.46335	-0.0954827	0.461489	0.329942	NA	3.46335	-0.172967	0.557322	0.196301	NA
chr1	151194728	151195006	21.1724	-0.173608	0.347172	0.199739	0.666163	21.1724	-0.0401262	0.239682	0.660997	0.924934	21.1724	0.102635	0.3076	0.394383	0.81972
chr1	151195233	151196449	105.251	-0.0435927	0.174038	0.704029	0.946353	105.251	-0.0957964	0.167932	0.345799	0.78754	105.251	-0.0457045	0.152492	0.576404	0.91101
chr1	151196580	151198390	177.748	0.050816	0.15571	0.651821	0.931792	177.748	-0.0685338	0.148146	0.493818	0.864278	177.748	-0.0959758	0.152035	0.256724	0.715476
chr1	151198560	151199641	110.383	0.206195	0.194115	0.0965602	0.489594	110.383	0.0343135	0.16009	0.729791	0.943332	110.383	-0.126023	0.18393	0.186028	0.631585
chr1	151199691	151199874	11.1745	0.149917	0.379534	0.25828	0.724549	11.1745	0.0126849	0.275341	0.889308	0.977589	11.1745	-0.135481	0.379877	0.319224	0.772994
chr1	1512170	1512526	19.2505	0.181443	0.35068	0.185541	0.646459	19.2505	0.0991765	0.280558	0.326596	0.776023	19.2505	-0.0374512	0.256037	0.724603	0.948076
chr1	151254313	151254610	16.6028	-0.111411	0.318809	0.365127	0.810617	16.6028	0.0226465	0.244006	0.801747	0.957545	16.6028	0.158997	0.369164	0.248018	0.70805
chr1	151254768	151255366	39.8678	0.0811008	0.229477	0.48455	0.875103	39.8678	0.0668673	0.208066	0.485189	0.861956	39.8678	-0.000468895	0.194996	0.995906	0.999152
chr1	151280945	151281166	11.7359	-0.0719146	0.317169	0.53972	0.896277	11.7359	-0.100266	0.325857	0.335384	0.781632	11.7359	-0.0409474	0.314923	0.728578	0.949345
chr1	151281468	151281925	60.867	-0.0712038	0.203335	0.538501	0.895893	60.867	0.0627874	0.184552	0.521215	0.87613	60.867	0.133547	0.229358	0.210043	0.662649
chr1	151282222	151283121	106.097	0.251941	0.212146	0.052894	0.357931	106.097	0.123467	0.173037	0.232865	0.696991	106.097	-0.0629334	0.155992	0.451105	0.853986
chr1	151327128	151327697	52.4161	-0.0213784	0.205974	0.850337	0.98016	52.4161	0.113032	0.207194	0.267458	0.730408	52.4161	0.144336	0.247486	0.196424	0.645715
chr1	151327872	151328099	11.9135	-0.0747086	0.323655	0.526092	0.891576	11.9135	0.00843549	0.265097	0.925703	0.984283	11.9135	0.0916072	0.344807	0.467346	0.862034
chr1	151328129	151328281	6.49916	-0.00287979	0.352687	0.979435	0.998586	6.49916	0.113532	0.393476	0.300989	0.757688	6.49916	0.151801	0.45009	0.292016	0.749596
chr1	151346640	151346817	14.9036	0.227035	0.417342	0.131565	0.563296	14.9036	0.0288207	0.26021	0.751793	0.948601	14.9036	-0.170027	0.382408	0.228727	0.685136
chr1	151346951	151347265	36.2741	0.00748487	0.225034	0.94656	0.993566	36.2741	0.0949078	0.225627	0.33759	0.782185	36.2741	0.0941453	0.24288	0.374491	0.809415
chr1	151347521	151347954	30.0241	0.298333	0.383325	0.0634291	0.395876	30.0241	0.0318154	0.217697	0.727692	0.942753	30.0241	-0.216187	0.350371	0.128748	0.533153
chr1	151398806	151399462	46.5821	-0.0431479	0.211727	0.704424	0.946353	46.5821	-0.0389164	0.192987	0.681381	0.93191	46.5821	-0.00255038	0.186492	0.977214	0.996681
chr1	151399574	151400046	53.101	-0.0137324	0.205349	0.903438	0.989187	53.101	0.0430594	0.189193	0.652681	0.922075	53.101	0.0523052	0.192378	0.568888	0.907655
chr1	151457731	151458562	69.7645	1.44766	0.336697	1.69421e-06	0.000127658	69.7645	0.410116	0.359743	0.010791	0.149874	69.7645	-0.388176	0.337777	0.0202361	0.181904
chr1	151459025	151459442	38.518	-0.0351871	0.22164	0.754987	0.959476	38.518	0.0430151	0.201509	0.646922	0.920288	38.518	0.0775446	0.225635	0.442414	0.849281
chr1	151612020	151612413	35.1815	0.0447714	0.232562	0.691575	0.942125	35.1815	0.137156	0.256378	0.197777	0.664795	35.1815	0.0949072	0.247081	0.375139	0.809553
chr1	151763617	151763790	12.115	0.0893831	0.326642	0.456345	0.861327	12.115	0.0540623	0.283886	0.568173	0.895163	12.115	-0.0203487	0.294967	0.858274	0.977946
chr1	151839934	151840327	19.6322	-0.0614468	0.279841	0.592094	0.917552	19.6322	0.10916	0.28607	0.289754	0.749548	19.6322	0.259183	0.434722	0.113435	0.499536
chr1	151840335	151840580	7.82254	-0.132928	0.396626	0.303074	0.762938	7.82254	-0.0808864	0.335953	0.425154	0.83315	7.82254	0.0297556	0.348534	0.807321	0.968605
chr1	151908862	151909457	44.4754	0.0824471	0.222754	0.478083	0.871057	44.4754	0.0311785	0.195283	0.739858	0.945652	44.4754	-0.0349265	0.194807	0.703565	0.943964
chr1	151909732	151910182	41.8301	-0.0331761	0.219147	0.76867	0.962826	41.8301	0.17909	0.261299	0.115465	0.543893	41.8301	0.288556	0.358906	0.0631488	0.362678
chr1	151944165	151944536	24.5163	-0.0777455	0.264629	0.50273	0.881523	24.5163	0.103416	0.255852	0.304534	0.760227	24.5163	0.275003	0.413326	0.0917927	0.447781
chr1	151944606	151945057	24.1898	-0.198525	0.339116	0.153557	0.600363	24.1898	-0.0342566	0.222241	0.707531	0.938124	24.1898	0.130554	0.307264	0.288477	0.746245
chr1	151945484	151945837	22.0018	-0.137183	0.302361	0.27677	0.741854	22.0018	-0.0395555	0.228868	0.665684	0.926496	22.0018	0.0734355	0.269912	0.507257	0.883643
chr1	151946111	151946514	25.0379	-0.846316	0.698371	0.00525135	0.0825213	25.0379	-0.0030291	0.223295	0.973075	0.993583	25.0379	0.908616	0.700349	0.00573125	0.0773891
chr1	151946731	151947176	21.6276	-0.885526	0.716533	0.00463448	0.076288	21.6276	-0.00822247	0.223916	0.927041	0.984283	21.6276	0.907978	0.711839	0.00593223	0.0792168
chr1	151947372	151947923	20.0458	-0.521455	0.583321	0.0209111	0.205363	20.0458	-0.058724	0.241303	0.530519	0.879624	20.0458	0.302285	0.468074	0.0867313	0.434363
chr1	151972751	151972955	11.612	-0.25691	0.518924	0.105749	0.508908	11.612	0.408487	0.622129	0.0340283	0.299943	11.612	1.60329	0.967259	0.000576534	0.0142571
chr1	151976727	151976922	7.73987	0.0322782	0.361193	0.774424	0.963434	7.73987	0.5664	0.819476	0.0165213	0.194396	7.73987	0.506515	0.725929	0.0327793	0.245021
chr1	151991076	151991307	8.82367	-0.168262	0.438832	0.218359	0.687418	8.82367	0.0694859	0.318517	0.481657	0.86061	8.82367	0.394936	0.644065	0.0580408	0.344827
chr1	151992037	151992429	24.143	-0.161367	0.315403	0.217799	0.686614	24.143	-0.0225415	0.221649	0.803281	0.957851	24.143	0.119135	0.300249	0.32269	0.775855
chr1	151992806	151994598	151.707	-0.158882	0.17052	0.177106	0.63661	151.707	0.318624	0.201532	0.00874892	0.130738	151.707	0.770847	0.246893	7.9268e-05	0.00295429
chr1	152034285	152036939	219.352	-0.19756	0.152659	0.0830039	0.452771	219.352	0.128567	0.137719	0.198042	0.66525	219.352	0.412763	0.211364	0.00258206	0.0437988
chr1	152046840	152048089	135.87	-1.16912	0.260144	4.60906e-07	4.0858e-05	135.87	0.149814	0.160954	0.151258	0.606482	135.87	1.48713	0.242915	1.40626e-10	3.08601e-08
chr1	152048294	152049534	114.641	-0.719684	0.324486	0.00036932	0.0116193	114.641	0.0363794	0.157133	0.714801	0.939038	114.641	0.901684	0.289693	8.74502e-05	0.00316161
chr1	153533449	153536079	174.976	-0.428591	0.215134	0.00227636	0.0461897	174.976	-0.138488	0.149318	0.176195	0.640058	174.976	0.170319	0.18049	0.0856459	0.431197
chr1	153538324	153538579	5.96957	-0.122862	0.417155	0.32775	NA	5.96957	-0.0515111	0.336281	0.595996	0.902951	5.96957	0.0584099	0.392215	0.645066	0.931651
chr1	153542544	153542718	9.54412	-0.0950663	0.349818	0.434022	0.850571	9.54412	-0.0369961	0.286632	0.691383	0.933771	9.54412	0.0473903	0.333932	0.695669	0.942761
chr1	153543165	153543642	20.6475	-0.0469852	0.268957	0.677609	0.938391	20.6475	0.0540468	0.24466	0.561462	0.892023	20.6475	0.123597	0.31848	0.3209	0.774391
chr1	153543740	153544177	18.432	0.00238119	0.274901	0.98291	0.999149	18.432	0.201053	0.388287	0.116958	0.547274	18.432	0.250095	0.43755	0.123806	0.522428
chr1	153544381	153545022	45.9053	0.0601428	0.217687	0.599414	0.919305	45.9053	0.150396	0.237487	0.163189	0.623269	45.9053	0.0862634	0.218031	0.387237	0.815836
chr1	153545326	153546812	137.508	0.333032	0.213284	0.0137544	0.157746	137.508	0.127941	0.161684	0.215589	0.682291	137.508	-0.110233	0.164269	0.21536	0.669263
chr1	1535615	1536051	9.99111	-0.148991	0.393746	0.261574	0.728098	9.99111	-0.0894679	0.328394	0.382321	0.8101	9.99111	0.0312967	0.330601	0.794166	0.965893
chr1	153565334	153568630	308.903	-0.0961223	0.129139	0.357377	0.804743	308.903	-0.0312335	0.121425	0.740844	0.946134	308.903	0.0401064	0.106808	0.553105	0.901754
chr1	1536137	1536523	11.4227	-0.0540856	0.304783	0.63767	0.927755	11.4227	-0.131354	0.357785	0.240443	0.705027	11.4227	-0.0879815	0.342543	0.482824	0.871538
chr1	153626679	153626867	10.8699	-0.00694369	0.296565	0.950496	0.993887	10.8699	-0.0356761	0.276347	0.699667	0.936732	10.8699	-0.0377442	0.310772	0.747393	0.953782
chr1	153627001	153627546	44.3686	0.0944525	0.224096	0.420935	0.845188	44.3686	-0.0383142	0.196444	0.684252	0.932527	44.3686	-0.136249	0.254974	0.225839	0.681745
chr1	153634041	153634444	68.7727	0.0182906	0.196203	0.872464	0.984465	68.7727	0.0782049	0.186898	0.429532	0.834433	68.7727	0.0559702	0.181474	0.531155	0.892239
chr1	153635442	153635614	3.32769	-0.0667499	0.426636	0.537269	NA	3.32769	-0.0681765	0.413863	0.483955	NA	3.32769	-0.00947212	0.44153	0.936398	NA
chr1	153658275	153658972	50.2799	-0.0169273	0.207337	0.881022	0.986124	50.2799	0.0526909	0.192223	0.583099	0.89953	50.2799	0.0658965	0.201253	0.485995	0.872932
chr1	153670604	153670898	17.0277	0.071787	0.289174	0.536598	0.895407	17.0277	0.178301	0.362766	0.142511	0.590554	17.0277	0.102103	0.307096	0.396284	0.821135
chr1	153671372	153672453	103.642	-0.0975154	0.177192	0.402506	0.835483	103.642	-0.19177	0.19075	0.0819235	0.468346	103.642	-0.0776789	0.165506	0.370736	0.807129
chr1	153727454	153727661	17.9133	0.0170194	0.264075	0.878348	0.985583	17.9133	0.0261419	0.238529	0.77231	0.952693	17.9133	0.0142866	0.256638	0.892835	0.982424
chr1	153728093	153728723	58.6268	0.0786926	0.206043	0.49828	0.880046	58.6268	0.11605	0.201861	0.257222	0.720898	58.6268	0.0395982	0.177925	0.652152	0.933658
chr1	1537313	1537483	2.65466	-0.126149	0.480293	0.266076	NA	2.65466	-0.181131	0.562449	0.115374	NA	2.65466	-0.0574314	0.481692	0.61457	NA
chr1	153783254	153783699	45.4319	0.0212367	0.21633	0.850312	0.98016	45.4319	0.0448241	0.199518	0.634634	0.916409	45.4319	0.0261672	0.196407	0.77602	0.960339
chr1	153922674	153922844	16.0997	0.148191	0.337573	0.255159	0.722656	16.0997	-0.00751045	0.246199	0.933244	0.985252	16.0997	-0.171365	0.373132	0.220888	0.675799
chr1	153923386	153923953	53.0369	-0.0160169	0.211523	0.887037	0.98746	53.0369	0.0288568	0.192899	0.759232	0.950193	53.0369	0.0413167	0.196128	0.654407	0.934515
chr1	153945820	153946687	93.2797	0.0419453	0.179201	0.715074	0.949735	93.2797	0.0678998	0.168185	0.497051	0.865275	93.2797	0.0250539	0.150407	0.756043	0.955129
chr1	153946853	153947066	12.5409	0.0837547	0.313393	0.480383	0.872108	12.5409	-0.0885426	0.312322	0.381934	0.810053	12.5409	-0.270317	0.489308	0.117061	0.506959
chr1	153958305	153958630	41.2075	0.100293	0.232689	0.395461	0.831012	41.2075	0.0682732	0.206511	0.477407	0.858932	41.2075	-0.0131134	0.193001	0.885358	0.981816
chr1	153962357	153963568	86.1791	-0.101202	0.191967	0.389288	0.826379	86.1791	0.101441	0.177461	0.318631	0.770843	86.1791	0.234028	0.261411	0.0639759	0.365356
chr1	153963745	153964900	96.1461	0.122241	0.188898	0.302568	0.762039	96.1461	0.0625999	0.169098	0.52977	0.879043	96.1461	-0.0332236	0.153201	0.68375	0.941054
chr1	153965940	153966214	15.4831	-0.00128021	0.272675	0.990806	0.999149	15.4831	-0.0239994	0.248497	0.790591	0.955057	15.4831	-0.0278823	0.275835	0.800527	0.967132
chr1	153966280	153966495	15.874	0.0334251	0.273138	0.76568	0.961695	15.874	-0.188292	0.392183	0.134879	0.57836	15.874	-0.33797	0.517867	0.0748174	0.400042
chr1	153966607	153967324	74.1093	0.0446748	0.190407	0.697405	0.944504	74.1093	0.0670386	0.178133	0.498193	0.865755	74.1093	0.0238231	0.162039	0.775478	0.960149
chr1	153967500	153967699	24.6044	-0.00688844	0.243617	0.950493	0.993887	24.6044	0.0459078	0.225174	0.618971	0.912478	24.6044	0.0584753	0.247065	0.577393	0.911693
chr1	153967889	153968139	16.4453	0.00450798	0.269439	0.967617	0.996582	16.4453	-0.0569949	0.261807	0.54401	0.885547	16.4453	-0.0752999	0.298152	0.518814	0.887823
chr1	153977138	153977698	53.733	0.165596	0.235343	0.187031	0.649223	53.733	-0.0422712	0.189465	0.658299	0.923803	53.733	-0.241676	0.306231	0.0781555	0.409468
chr1	153978127	153978427	14.9856	-0.0725888	0.29127	0.532688	0.89426	14.9856	-0.191039	0.392154	0.131008	0.571695	14.9856	-0.1124	0.33674	0.375225	0.809553
chr1	153987021	153987508	20.5643	0.00442499	0.251889	0.968156	0.996626	20.5643	-0.0701155	0.250632	0.462014	0.849402	20.5643	-0.0886809	0.284375	0.439632	0.847778
chr1	153990787	153991132	36.3033	-0.00521146	0.223865	0.962793	0.9959	36.3033	0.0454775	0.206689	0.626868	0.914463	36.3033	0.0518419	0.217193	0.595713	0.918233
chr1	153991318	153991730	16.7958	-0.0606958	0.280203	0.596422	0.918772	16.7958	-0.0204872	0.239879	0.819964	0.962241	16.7958	0.0332496	0.269816	0.760777	0.956955
chr1	15409990	15410639	25.2315	-0.155107	0.299978	0.22848	0.697849	25.2315	-0.0807743	0.239589	0.403775	0.821663	25.2315	0.0389261	0.240216	0.704747	0.944226
chr1	15416156	15416360	7.33021	-0.298055	0.565551	0.0769093	0.435723	7.33021	-0.136933	0.406253	0.235717	0.700619	7.33021	0.0817483	0.396134	0.529007	0.891325
chr1	154182770	154183159	37.2901	0.057938	0.228142	0.611201	0.922229	37.2901	0.0126181	0.201614	0.890948	0.977683	37.2901	-0.0354629	0.208263	0.709087	0.945127
chr1	154183442	154183719	18.6388	-0.0472559	0.277297	0.676544	0.938069	18.6388	0.0580209	0.254307	0.536164	0.881887	18.6388	0.132851	0.336504	0.302526	0.758756
chr1	154219763	154220633	109.512	0.235683	0.220485	0.0707492	0.417255	109.512	0.470764	0.319355	0.0034897	0.0708805	109.512	0.102641	0.181244	0.26718	0.727509
chr1	154220931	154221996	94.2487	0.0390224	0.179143	0.734012	0.953723	94.2487	0.113467	0.175012	0.269411	0.731716	94.2487	0.0649003	0.163136	0.447325	0.850757
chr1	154272028	154272236	16.2721	0.148139	0.350862	0.258149	0.724549	16.2721	-0.0343462	0.263261	0.707926	0.938187	16.2721	-0.245865	0.452252	0.13297	0.54142
chr1	154272366	154272537	10.5432	-0.0432743	0.309558	0.70425	0.946353	10.5432	-0.0175837	0.271006	0.846889	0.969194	10.5432	0.0219991	0.309892	0.850332	0.977339
chr1	154272651	154273007	26.2667	0.514798	0.528389	0.0182518	0.188311	26.2667	0.19548	0.338449	0.111586	0.535673	26.2667	-0.0866053	0.257076	0.425525	0.838886
chr1	154324927	154325315	14.7563	-0.0420204	0.279776	0.709835	0.94825	14.7563	-0.165773	0.368821	0.16554	0.627317	14.7563	-0.134151	0.35621	0.31089	0.766279
chr1	154326411	154326653	6.67234	-0.0114422	0.331948	0.918956	0.99089	6.67234	-0.200436	0.500702	0.132258	0.573814	6.67234	-0.228945	0.526833	0.160251	0.592116
chr1	154558057	154558493	40.7221	0.0733294	0.225214	0.524975	0.891233	40.7221	0.0159995	0.19724	0.863158	0.973226	40.7221	-0.0439027	0.203814	0.641283	0.930508
chr1	154559036	154559410	37.2558	0.16185	0.268634	0.204338	0.671594	37.2558	0.111756	0.232736	0.271346	0.733555	37.2558	-0.016365	0.199143	0.859554	0.978025
chr1	154607416	154608196	65.9155	0.865233	0.417799	0.000585282	0.0165327	65.9155	0.154561	0.216773	0.151126	0.606378	65.9155	-0.300602	0.311795	0.0413955	0.282153
chr1	154608285	154608767	37.277	0.0543693	0.23005	0.632321	0.926919	37.277	0.158198	0.263913	0.152144	0.607744	37.277	0.101797	0.245291	0.34203	0.789324
chr1	154627267	154627966	62.4666	0.207031	0.242354	0.113258	0.526409	62.4666	0.030188	0.182354	0.753394	0.948601	62.4666	-0.136029	0.228784	0.202265	0.652232
chr1	154628033	154628254	16.355	0.1197	0.316833	0.335266	0.790165	16.355	0.0147827	0.245491	0.869319	0.974219	16.355	-0.0965885	0.308893	0.421936	0.836382
chr1	154936387	154936613	18.6045	0.0439551	0.278654	0.697412	0.944504	18.6045	0.137294	0.323839	0.214787	0.681245	18.6045	0.103063	0.311258	0.39534	0.820423
chr1	154936726	154936933	26.3247	0.107771	0.272994	0.369719	0.813101	26.3247	0.166564	0.306103	0.146926	0.598898	26.3247	0.0569558	0.240712	0.581838	0.913362
chr1	154937381	154937704	20.8979	-0.0848978	0.27436	0.468762	0.866338	20.8979	-0.153444	0.318737	0.175784	0.639762	20.8979	-0.0699509	0.275246	0.531203	0.892239
chr1	154955938	154956157	5.77544	-0.125844	0.41811	0.318947	NA	5.77544	-0.144311	0.441052	0.219836	0.686544	5.77544	-0.0283777	0.385846	0.819182	0.971202
chr1	154961410	154962605	115.731	0.12618	0.180256	0.284751	0.747743	115.731	0.090163	0.165219	0.373601	0.805762	115.731	-0.0144959	0.141522	0.852865	0.977526
chr1	154969426	154969700	14.4155	-0.191656	0.404507	0.178174	0.637883	14.4155	0.0492277	0.264269	0.597115	0.903318	14.4155	0.374968	0.562549	0.0632566	0.363117
chr1	154970011	154970716	58.1616	-0.0833979	0.210782	0.473982	0.869096	58.1616	-0.00770378	0.183726	0.935474	0.985552	58.1616	0.0587304	0.192696	0.524071	0.889303
chr1	154970868	154973708	263.849	-0.404073	0.17271	0.00117894	0.0285867	263.849	0.00569586	0.125956	0.952587	0.988235	263.849	0.451075	0.196553	0.000936303	0.0208828
chr1	154973913	154974408	76.8648	0.0812836	0.196918	0.485257	0.875164	76.8648	0.194918	0.222124	0.0851786	0.477143	76.8648	0.0968939	0.194544	0.308542	0.764882
chr1	154974688	154974883	21.1306	-0.0359589	0.261238	0.748296	0.957227	21.1306	0.148008	0.306553	0.184134	0.648594	21.1306	0.267713	0.423284	0.101518	0.471964
chr1	154975051	154976417	142.632	0.162715	0.171043	0.167712	0.621294	142.632	0.0771905	0.153312	0.443317	0.839827	142.632	-0.0483341	0.137812	0.535617	0.894433
chr1	154977686	154977922	7.62762	-0.224456	0.482591	0.136895	0.572819	7.62762	-0.417805	0.704254	0.0329148	0.294022	7.62762	-0.0896732	0.400934	0.494211	0.877594
chr1	154983612	154983815	11.7648	0.0607238	0.306573	0.599352	0.919305	11.7648	-0.0105119	0.265157	0.90754	0.980726	11.7648	-0.0781848	0.325336	0.521121	0.88846
chr1	154989563	154989779	3.66652	-0.146067	0.476502	0.237771	NA	3.66652	-0.107006	0.432739	0.316588	NA	3.66652	0.0246853	0.430743	0.83876	NA
chr1	155000127	155000482	21.1871	0.805735	0.674662	0.00590411	0.0893322	21.1871	0.134741	0.313029	0.218239	0.68465	21.1871	-0.247529	0.405236	0.115093	0.503331
chr1	155000930	155002069	101.524	0.394783	0.266818	0.00966787	0.124847	101.524	0.105798	0.173033	0.300505	0.757551	101.524	-0.165903	0.210331	0.117048	0.506959
chr1	155002723	155003416	48.086	0.0907187	0.22048	0.438156	0.852289	48.086	0.117003	0.215747	0.253078	0.718329	48.086	0.0326169	0.187503	0.716914	0.947103
chr1	155003557	155004455	58.0751	-0.107292	0.215016	0.365291	0.810633	58.0751	0.0383395	0.183879	0.690366	0.933166	58.0751	0.143975	0.242024	0.192548	0.640691
chr1	155017095	155017605	36.3694	0.147863	0.268425	0.238868	0.708208	36.3694	0.322563	0.389992	0.0331361	0.295578	36.3694	0.101888	0.244423	0.340753	0.788467
chr1	155050690	155051106	42.5979	0.181923	0.26719	0.162157	0.613704	42.5979	0.110826	0.223077	0.274517	0.736291	42.5979	-0.0286755	0.193637	0.753594	0.954787
chr1	155051367	155051894	27.3937	-0.0689032	0.247927	0.54819	0.900165	27.3937	-0.149184	0.286823	0.176257	0.640167	27.3937	-0.0814131	0.259118	0.454348	0.8552
chr1	155063762	155064149	27.178	0.0226215	0.244513	0.839007	0.978246	27.178	0.0345817	0.222566	0.704922	0.937319	27.178	0.0174065	0.2306	0.861939	0.978431
chr1	1550655	1550843	7.30245	-0.116998	0.388384	0.351786	0.800697	7.30245	-0.0477242	0.311396	0.617776	0.912002	7.30245	0.0551968	0.362936	0.658597	0.935784
chr1	155084926	155085392	41.2928	0.0265226	0.21739	0.813838	0.971988	41.2928	0.0267725	0.197498	0.774117	0.952717	41.2928	0.00454834	0.194175	0.960217	0.994256
chr1	155085519	155086164	54.2133	-0.178632	0.248652	0.163222	0.614856	54.2133	0.0224062	0.185711	0.81382	0.960274	54.2133	0.213272	0.295683	0.103159	0.475662
chr1	155127279	155127751	20.8941	0.0267601	0.25745	0.810327	0.971027	20.8941	-0.099647	0.278205	0.324089	0.775272	20.8941	-0.166026	0.353773	0.222005	0.677121
chr1	155127929	155128240	19.107	-0.0146381	0.260795	0.895151	0.988414	19.107	-0.0066104	0.232868	0.94114	0.986307	19.107	0.00617111	0.253521	0.953267	0.99318
chr1	155134913	155135690	66.3365	0.10157	0.205715	0.38897	0.826126	66.3365	0.259798	0.265922	0.0394022	0.324025	66.3365	0.121594	0.214164	0.232768	0.690146
chr1	155135896	155136610	57.3902	0.0399586	0.202094	0.726362	0.952012	57.3902	0.0732727	0.19057	0.455331	0.84609	57.3902	0.0345429	0.17854	0.694118	0.942761
chr1	155137008	155137219	8.60324	-0.0535585	0.333102	0.642696	0.929281	8.60324	-0.0900644	0.344735	0.383776	0.811652	8.60324	-0.0499678	0.350061	0.685245	0.941425
chr1	155139233	155139428	5.60681	-0.102728	0.394446	0.400507	NA	5.60681	-0.334078	0.671544	0.0474108	0.358088	5.60681	-0.17835	0.507692	0.229312	0.686081
chr1	155139736	155140474	62.8141	-0.0397485	0.196692	0.728416	0.952218	62.8141	-0.158586	0.217897	0.142935	0.591604	62.8141	-0.113276	0.217326	0.265929	0.726423
chr1	155172722	155173271	43.1344	0.134438	0.243639	0.271888	0.737578	43.1344	0.0706779	0.20617	0.463527	0.85078	43.1344	-0.0342202	0.196209	0.710251	0.945127
chr1	155173519	155173681	12.6272	0.0551136	0.306913	0.631808	0.926858	12.6272	0.0712603	0.293799	0.464916	0.85178	12.6272	0.0284689	0.295927	0.803302	0.967773
chr1	155192076	155194829	233.324	-0.130718	0.146464	0.23947	0.708775	233.324	0.355499	0.175508	0.00232148	0.0542217	233.324	0.687054	0.199807	2.66979e-05	0.00122486
chr1	155195065	155195344	17.9403	0.185548	0.364425	0.181309	0.641593	17.9403	0.214535	0.397416	0.103504	0.517633	17.9403	0.030788	0.257689	0.772555	0.959229
chr1	155195420	155195670	7.48183	0.00842503	0.333406	0.940235	0.992733	7.48183	0.0197062	0.303297	0.832235	0.96611	7.48183	0.0164697	0.344882	0.891907	0.982424
chr1	155207182	155207435	14.9543	0.0412658	0.278663	0.714595	0.949559	14.9543	-0.0516408	0.263309	0.580181	0.898492	14.9543	-0.115883	0.333443	0.359743	0.800127
chr1	155207630	155207775	11.055	-0.010955	0.303705	0.922159	0.991374	11.055	-0.0493954	0.291643	0.601834	0.90492	11.055	-0.0507673	0.326266	0.672857	0.939217
chr1	155208099	155208629	38.4079	0.00291053	0.221699	0.979238	0.998579	38.4079	-0.0435496	0.206411	0.640997	0.91865	38.4079	-0.0476338	0.215016	0.623513	0.924953
chr1	155208740	155209170	61.4628	0.0566586	0.203089	0.621984	0.92472	61.4628	0.0370342	0.184451	0.699878	0.936772	61.4628	-0.00947463	0.173125	0.912323	0.985257
chr1	155209301	155209571	15.733	-0.00758902	0.273902	0.945582	0.993536	15.733	0.0553975	0.25891	0.554048	0.889549	15.733	0.0766773	0.297549	0.511068	0.885035
chr1	155224964	155225196	9.15673	-0.0609777	0.329939	0.599928	0.919325	9.15673	-0.0144903	0.280072	0.874141	0.975663	9.15673	0.0445103	0.332826	0.712629	0.945449
chr1	155226181	155226421	6.46796	-0.023231	0.347748	0.836579	0.97723	6.46796	-0.0352158	0.324758	0.710953	0.939038	6.46796	-0.0199954	0.366152	0.870902	0.97956
chr1	155226830	155227529	66.5232	0.0215512	0.193857	0.85024	0.98016	66.5232	0.0733548	0.183414	0.458276	0.847571	66.5232	0.0480673	0.174987	0.582582	0.913506
chr1	155227793	155227991	13.0888	-0.0779741	0.308611	0.507747	0.884134	13.0888	-0.0263245	0.256942	0.771924	0.952693	13.0888	0.0432694	0.297252	0.70671	0.944694
chr1	155243588	155244611	98.2065	0.166317	0.193266	0.171437	0.627075	98.2065	0.063315	0.166555	0.526099	0.878026	98.2065	-0.0624608	0.159693	0.459361	0.858099
chr1	155244940	155245392	35.0912	0.0194666	0.225287	0.861905	0.981864	35.0912	0.0889288	0.222565	0.364785	0.800562	35.0912	0.073971	0.229121	0.466362	0.861196
chr1	15524606	15524852	28.9853	-0.0155433	0.236822	0.888922	0.98746	28.9853	0.0591303	0.222419	0.529212	0.878714	28.9853	0.082096	0.251669	0.443721	0.849878
chr1	155253759	155253929	5.92848	-0.0727078	0.370761	0.535906	NA	5.92848	-0.098204	0.38185	0.355133	0.794158	5.92848	-0.0378668	0.378499	0.761126	0.957094
chr1	155254908	155255435	55.3825	0.0381555	0.205005	0.737687	0.95501	55.3825	-0.116814	0.212445	0.253838	0.718868	55.3825	-0.178796	0.273131	0.140901	0.557189
chr1	155255579	155255800	21.6949	-0.0367291	0.257487	0.743101	0.956409	21.6949	0.0666641	0.242564	0.481478	0.860535	21.6949	0.126088	0.308479	0.304501	0.760974
chr1	15525701	15526030	20.2375	0.245964	0.396506	0.107421	0.513021	20.2375	0.012996	0.236831	0.884772	0.977257	20.2375	-0.224084	0.398382	0.140698	0.556848
chr1	155261715	155262273	39.7665	0.226505	0.299181	0.104572	0.506942	39.7665	0.0131014	0.200198	0.887077	0.977257	39.7665	-0.193729	0.305723	0.136921	0.549592
chr1	155262516	155262910	26.3599	0.042655	0.244574	0.704481	0.946353	26.3599	-0.0472402	0.226506	0.609217	0.908787	26.3599	-0.100978	0.275022	0.37421	0.809415
chr1	15526884	15527196	32.2467	0.149768	0.27211	0.23477	0.704356	32.2467	-8.00311e-05	0.207274	0.999299	0.999807	32.2467	-0.142651	0.284828	0.233012	0.690265
chr1	155272830	155273500	69.6819	0.150735	0.211771	0.217633	0.686614	69.6819	0.0658999	0.18075	0.503865	0.868962	69.6819	-0.0495089	0.171883	0.568272	0.90758
chr1	155273668	155274159	37.6994	-0.0863176	0.233261	0.458878	0.862968	37.6994	-0.0674113	0.209889	0.481336	0.860455	37.6994	0.0038723	0.201341	0.966765	0.995849
chr1	155308029	155308618	49.3537	-0.139877	0.235333	0.253872	0.721927	49.3537	-0.0255524	0.188615	0.787375	0.954271	49.3537	0.0871608	0.216713	0.38117	0.813006
chr1	155308953	155309565	38.4913	0.0427912	0.22362	0.70511	0.946427	38.4913	0.0396128	0.203127	0.67153	0.928748	38.4913	0.00399066	0.198947	0.965533	0.995814
chr1	155322840	155323059	16.6801	0.00332889	0.267158	0.976072	0.997677	16.6801	-0.0737435	0.271392	0.445323	0.841189	16.6801	-0.0952548	0.311124	0.429615	0.841925
chr1	155323451	155324280	97.2339	0.00234714	0.176904	0.983634	0.999149	97.2339	-0.014168	0.164012	0.885763	0.977257	97.2339	-0.0130766	0.148285	0.869997	0.97956
chr1	155324526	155325162	55.5754	0.0845394	0.216327	0.468018	0.866288	55.5754	0.0651882	0.195924	0.50044	0.86721	55.5754	-0.00489824	0.181054	0.955595	0.993353
chr1	155562036	155562783	91.5511	0.135862	0.200591	0.258684	0.725007	91.5511	0.182227	0.207631	0.0995518	0.509132	91.5511	0.0430844	0.162459	0.608872	0.921117
chr1	155562927	155563218	41.758	0.230102	0.298767	0.100307	0.497148	41.758	0.244215	0.314447	0.0587724	0.400073	41.758	0.0217708	0.192157	0.810631	0.969342
chr1	155563294	155563641	25.1878	0.587582	0.569241	0.0132536	0.154323	25.1878	0.262915	0.404109	0.0641677	0.416936	25.1878	-0.0692463	0.247977	0.512144	0.885035
chr1	155564174	155564464	17.0208	0.105787	0.305114	0.383753	0.822816	17.0208	0.0212495	0.244453	0.813605	0.960221	17.0208	-0.073341	0.2892	0.522944	0.888832
chr1	155564921	155565091	5.55657	-0.0753892	0.38708	0.518876	NA	5.55657	0.0268536	0.323991	0.775928	0.952717	5.55657	0.12791	0.444179	0.356178	0.798721
chr1	155609583	155610019	34.9512	-0.0907479	0.242219	0.438258	0.852289	34.9512	0.0120984	0.201996	0.895331	0.978486	34.9512	0.0976112	0.248761	0.364274	0.803502
chr1	155688039	155688701	71.3246	0.223208	0.241652	0.0916587	0.47804	71.3246	0.193924	0.227107	0.0875138	0.482516	71.3246	0.00107268	0.161794	0.989715	0.998277
chr1	155688829	155689459	57.3878	0.0204804	0.201526	0.856942	0.980937	57.3878	0.133256	0.2101	0.202826	0.669957	57.3878	0.110785	0.218059	0.27629	0.735704
chr1	155745225	155745636	26.8488	-0.0279827	0.239436	0.80215	0.969891	26.8488	-0.0507494	0.22356	0.584936	0.89993	26.8488	-0.029332	0.229943	0.769524	0.958212
chr1	155856988	155857137	12.352	0.0132552	0.29066	0.905614	0.989637	12.352	0.0411406	0.268827	0.656635	0.923491	12.352	0.0371242	0.296182	0.745949	0.953618
chr1	155857349	155857622	18.3895	-0.0222373	0.261682	0.841702	0.978442	18.3895	-0.0689466	0.258204	0.469767	0.854331	18.3895	-0.0578226	0.274865	0.60265	0.920166
chr1	155859009	155859179	6.69746	-0.0942648	0.379743	0.436362	0.85194	6.69746	-0.0791472	0.351834	0.436952	0.837129	6.69746	0.000881897	0.361348	0.994251	0.998611
chr1	155893147	155893785	35.0154	-0.694566	0.532237	0.00557436	0.0857637	35.0154	-0.268246	0.346391	0.0498569	0.367492	35.0154	0.0917214	0.250323	0.393591	0.819656
chr1	155894034	155894612	22.6902	-1.76931	0.627614	7.0233e-05	0.00302403	22.6902	-0.777275	0.680509	0.00533175	0.0941033	22.6902	0.204284	0.399082	0.170489	0.608747
chr1	155905220	155905390	3.62296	-0.0353366	0.390993	0.747482	NA	3.62296	-0.173126	0.532657	0.145141	NA	3.62296	-0.158629	0.527412	0.246632	NA
chr1	155910865	155911820	66.847	0.124358	0.209167	0.299434	0.759577	66.847	0.0566685	0.182198	0.561952	0.892355	66.847	-0.0400267	0.172493	0.643714	0.931232
chr1	155912406	155912797	9.91209	-0.0442249	0.312115	0.698447	0.944732	9.91209	-0.156493	0.403601	0.191642	0.657905	9.91209	-0.124631	0.389347	0.358007	0.799219
chr1	155933669	155933873	11.0974	0.0160133	0.302585	0.886531	0.987282	11.0974	0.0184148	0.272547	0.839962	0.967723	11.0974	0.00672006	0.304975	0.953625	0.99318
chr1	155934043	155934389	28.2528	-0.00473146	0.237002	0.966028	0.996059	28.2528	0.0750226	0.230067	0.434185	0.836122	28.2528	0.0893947	0.257051	0.411536	0.830864
chr1	155934658	155935116	44.9409	0.054303	0.218954	0.633946	0.927587	44.9409	0.0544465	0.200625	0.567003	0.894801	44.9409	0.00843764	0.191097	0.925675	0.988113
chr1	155960851	155961065	6.18998	-0.203119	0.48515	0.15833	NA	6.18998	-0.131572	0.412441	0.249752	0.713995	6.18998	0.0355301	0.380116	0.775276	0.960084
chr1	155961182	155961829	19.3696	-1.16481	0.750516	0.00160888	0.0354472	19.3696	-0.232335	0.394228	0.0854051	0.477439	19.3696	0.25238	0.445529	0.123851	0.522428
chr1	155962373	155962732	16.2769	-0.574855	0.642017	0.0174929	0.182498	16.2769	-0.279692	0.465895	0.0647188	0.418659	16.2769	0.0679035	0.306477	0.564539	0.906635
chr1	155967506	155967694	4.52552	-0.10317	0.417991	0.390049	NA	4.52552	-0.137294	0.455827	0.231855	NA	4.52552	-0.0423945	0.414889	0.733573	NA
chr1	155978160	155979731	117.092	0.0485344	0.171903	0.672221	0.937573	117.092	-0.0208623	0.15941	0.833343	0.966199	117.092	-0.0517911	0.151132	0.52625	0.890208
chr1	156001070	156001239	5.45099	0.243837	0.600167	0.063088	NA	5.45099	0.471833	0.867313	0.0100818	0.144268	5.45099	0.14975	0.459276	0.296621	0.753339
chr1	156020442	156020903	40.0913	0.0808893	0.229015	0.485627	0.875181	40.0913	0.0617062	0.206226	0.517472	0.874879	40.0913	-0.00493801	0.194825	0.956888	0.993814
chr1	156053181	156053712	41.5376	-0.069782	0.223634	0.544255	0.898095	41.5376	0.0143169	0.194401	0.877988	0.976827	41.5376	0.0756474	0.219725	0.446945	0.850398
chr1	156053859	156054604	114.957	-0.0572932	0.171555	0.617904	0.923945	114.957	0.103555	0.163487	0.310345	0.764738	114.957	0.15215	0.195836	0.131471	0.538327
chr1	156054833	156055212	36.7534	0.240568	0.31997	0.0947226	0.48514	36.7534	0.208286	0.303884	0.0880605	0.483732	36.7534	0.00240625	0.198272	0.979175	0.997089
chr1	156081329	156081618	14.4136	-0.057612	0.294344	0.615833	0.923523	14.4136	-0.0189971	0.252307	0.833252	0.966161	14.4136	0.033135	0.288177	0.769243	0.958204
chr1	156082175	156082378	11.5836	0.012061	0.29435	0.914146	0.990378	11.5836	0.0299515	0.267977	0.743647	0.947037	11.5836	0.0249233	0.297507	0.827694	0.973457
chr1	156082588	156083157	38.191	-0.00777616	0.218032	0.944712	0.99311	38.191	-0.0613727	0.207695	0.519013	0.875467	38.191	-0.0557055	0.214329	0.566514	0.907232
chr1	156103567	156103752	6.19962	0.0318004	0.344067	0.778979	NA	6.19962	-0.100931	0.388386	0.344906	0.786534	6.19962	-0.184292	0.486554	0.224621	0.680193
chr1	156103952	156104213	19.1348	-0.00870525	0.258771	0.937445	0.992733	19.1348	-0.0752853	0.261638	0.434929	0.836255	19.1348	-0.0805131	0.28789	0.483704	0.871762
chr1	156105243	156106493	93.5849	0.17939	0.200292	0.145833	0.587219	93.5849	-0.0130586	0.166454	0.89431	0.978326	93.5849	-0.174346	0.222307	0.111765	0.496222
chr1	156113719	156114125	25.9361	-0.154373	0.303645	0.231227	0.701489	25.9361	-0.00894887	0.216216	0.92104	0.983376	25.9361	0.136115	0.306983	0.270435	0.731279
chr1	156114225	156114536	36.4616	-0.483568	0.461381	0.0169693	0.17934	36.4616	-0.0503486	0.204826	0.593119	0.902352	36.4616	0.313087	0.399658	0.0611812	0.356599
chr1	156114777	156116198	122.025	-0.0773053	0.169039	0.501674	0.881029	122.025	-0.111921	0.163171	0.274989	0.736498	122.025	-0.0325285	0.141581	0.678729	0.940777
chr1	156116382	156116963	28.0388	-0.317104	0.411776	0.0581388	0.377434	28.0388	-0.0436413	0.21856	0.636681	0.917138	28.0388	0.203748	0.357024	0.150618	0.575117
chr1	156117051	156117573	20.3962	-0.16302	0.341165	0.220581	0.690118	20.3962	-0.146546	0.32641	0.193118	0.659007	20.3962	-0.00736369	0.264345	0.94548	0.991847
chr1	156117685	156117883	7.74085	-0.221925	0.480638	0.139635	0.577075	7.74085	-0.122631	0.37944	0.270665	0.732774	7.74085	0.050016	0.361519	0.68763	0.941747
chr1	156118146	156119071	27.2397	-0.382628	0.445647	0.0366628	0.290565	27.2397	-0.280289	0.393543	0.0519537	0.375572	27.2397	0.0168113	0.232191	0.867102	0.979245
chr1	156119491	156119802	11.2233	-0.137534	0.364861	0.288819	0.750237	11.2233	-0.102846	0.32512	0.324957	0.775666	11.2233	0.00995592	0.306975	0.931554	0.989376
chr1	156120263	156120536	5.63745	-0.153889	0.449261	0.242044	NA	5.63745	-0.114272	0.406067	0.29893	0.756143	5.63745	0.0181672	0.386716	0.883197	0.981207
chr1	156120732	156121603	23.7069	-0.159778	0.310077	0.220047	0.689367	23.7069	-0.131098	0.283413	0.219831	0.686544	23.7069	0.000904333	0.239286	0.992929	0.998424
chr1	156121679	156122215	20.4922	-0.0179284	0.255572	0.87183	0.984345	20.4922	-0.0759082	0.256838	0.430775	0.834982	20.4922	-0.0696168	0.275158	0.533036	0.892641
chr1	156122352	156123549	83.0697	-0.110086	0.199301	0.352384	0.801575	83.0697	-0.0484337	0.175513	0.621588	0.913188	83.0697	0.0375637	0.167469	0.659419	0.936108
chr1	156123607	156124212	32.6948	-0.0342584	0.227129	0.760584	0.960547	32.6948	-0.15872	0.274965	0.153644	0.610038	32.6948	-0.13081	0.278444	0.263617	0.723297
chr1	156124947	156125117	8.04836	-0.0780481	0.354888	0.511029	0.885729	8.04836	-0.0227756	0.295631	0.806038	0.958755	8.04836	0.051457	0.354024	0.677669	0.940429
chr1	156125358	156126497	56.0767	-0.333733	0.323969	0.0340822	0.277707	56.0767	-0.797774	0.496261	0.001458	0.0392735	56.0767	-0.112461	0.234795	0.287296	0.744785
chr1	156126635	156126819	10.8359	-0.0903452	0.331165	0.45264	0.859665	10.8359	-0.0820086	0.308831	0.412265	0.827902	10.8359	-0.00734317	0.307966	0.94955	0.992835
chr1	156127045	156127410	17.164	-0.25489	0.416478	0.102723	0.502692	17.164	-0.442458	0.590309	0.0256382	0.257869	17.164	-0.07049	0.299205	0.545607	0.899437
chr1	156127606	156127848	7.06225	-0.122791	0.397702	0.332433	0.787552	7.06225	-0.129667	0.403483	0.254117	0.718936	7.06225	-0.020429	0.361235	0.867805	0.979414
chr1	156128396	156128647	12.0795	-0.118397	0.342725	0.344691	0.797045	12.0795	-0.21353	0.443471	0.113934	0.540491	12.0795	-0.0788847	0.33575	0.523231	0.889031
chr1	156129042	156129290	13.5376	-0.110957	0.338425	0.37032	0.813228	13.5376	-0.121221	0.341009	0.265443	0.729012	13.5376	-0.0246548	0.304144	0.831221	0.974103
chr1	156129707	156129877	8.53022	-0.0233104	0.323013	0.836435	0.977132	8.53022	-0.0359322	0.299686	0.701903	0.937164	8.53022	-0.0209888	0.335499	0.86144	0.978388
chr1	156129914	156130297	26.5854	0.0373517	0.242996	0.739047	0.955228	26.5854	0.0352552	0.219607	0.700127	0.936877	26.5854	0.00490744	0.224164	0.960254	0.994256
chr1	156130507	156130881	22.4389	-0.232157	0.372547	0.116876	0.535192	22.4389	-0.0611711	0.236913	0.514921	0.873196	22.4389	0.111353	0.299609	0.351999	0.79606
chr1	15616601	15617015	28.5937	-0.00643642	0.233276	0.953862	0.994201	28.5937	-0.174829	0.306798	0.133109	0.575739	28.5937	-0.200957	0.347743	0.150019	0.573729
chr1	15617505	15618069	56.8734	0.00209167	0.19978	0.9853	0.999149	56.8734	-0.0140223	0.183025	0.883152	0.977257	56.8734	-0.0142757	0.175169	0.86906	0.97956
chr1	156193262	156193808	41.1107	-0.143468	0.259587	0.248742	0.717535	41.1107	0.0153523	0.198409	0.868342	0.974112	41.1107	0.162321	0.290092	0.186844	0.631932
chr1	156212520	156212734	12.4767	0.0726339	0.310543	0.535158	0.894622	12.4767	0.00800686	0.262112	0.929342	0.984358	12.4767	-0.0632131	0.31097	0.59345	0.917482
chr1	156213001	156213226	30.749	0.123994	0.271779	0.310874	0.770848	30.749	0.329247	0.421198	0.0353766	0.305911	30.749	0.127307	0.27785	0.274671	0.734928
chr1	156213322	156213837	38.2216	0.11101	0.241522	0.352625	0.801607	38.2216	-0.0476566	0.207097	0.611113	0.909353	38.2216	-0.185529	0.30563	0.150798	0.575361
chr1	156282144	156282458	17.2345	0.0122972	0.277515	0.912079	0.990224	17.2345	0.067487	0.270951	0.480754	0.860174	17.2345	0.0686407	0.296056	0.553757	0.901754
chr1	156282563	156282829	34.485	0.119314	0.257072	0.324182	0.782117	34.485	0.240062	0.334441	0.0660381	0.421465	34.485	0.0891516	0.239561	0.395401	0.820436
chr1	156283085	156283308	15.989	-0.0118555	0.268488	0.915046	0.990378	15.989	-0.0955901	0.290335	0.344174	0.78629	15.989	-0.102676	0.319128	0.40275	0.824925
chr1	156291938	156292141	7.36096	0.0366508	0.329794	0.747439	0.957076	7.36096	-0.261893	0.570784	0.0821134	0.468763	7.36096	-0.445725	0.703675	0.0424735	0.286822
chr1	156337754	156338205	43.0981	0.130917	0.242035	0.28265	0.746015	43.0981	0.050865	0.200958	0.59123	0.902292	43.0981	-0.0512604	0.203475	0.5872	0.915454
chr1	156338540	156338747	29.4419	0.208494	0.324907	0.134926	0.569165	29.4419	0.246608	0.361264	0.0668088	0.42414	29.4419	0.0325244	0.218603	0.73862	0.951878
chr1	156456763	156457252	86.4989	-0.00530336	0.1821	0.963036	0.9959	86.4989	0.0632608	0.170892	0.524888	0.877484	86.4989	0.0581909	0.165601	0.496888	0.878269
chr1	156457557	156458071	28.7238	-0.124778	0.269131	0.307722	0.767732	28.7238	-0.0844939	0.232966	0.385246	0.812788	28.7238	0.0156248	0.222351	0.873461	0.979665
chr1	156500254	156500823	44.6539	0.170854	0.257645	0.181554	0.641618	44.6539	-0.0151492	0.195854	0.870645	0.974788	44.6539	-0.192308	0.29643	0.133389	0.542503
chr1	156501006	156501495	81.6688	0.0799898	0.188135	0.491725	0.878682	81.6688	0.0255172	0.170162	0.794559	0.95558	81.6688	-0.035771	0.159562	0.667347	0.938037
chr1	156501621	156502988	74.1216	-0.231215	0.237046	0.080994	0.447673	74.1216	-0.160144	0.203692	0.137619	0.583382	74.1216	0.023008	0.165157	0.784854	0.96252
chr1	156503097	156503734	38.7569	-0.295971	0.348454	0.0575915	0.375996	38.7569	-0.0595075	0.20506	0.53188	0.88024	38.7569	0.156637	0.287006	0.197881	0.647294
chr1	156503814	156505120	96.2414	-0.0705991	0.187827	0.542481	0.897621	96.2414	-0.0678672	0.17431	0.494904	0.864536	96.2414	-0.00572184	0.156323	0.944281	0.991698
chr1	156505540	156505918	30.8766	-0.00924399	0.236957	0.933718	0.992061	30.8766	0.0539227	0.221462	0.563626	0.892949	30.8766	0.0689836	0.244082	0.510125	0.884805
chr1	156572238	156572385	6.18748	0.161503	0.484509	0.208232	NA	6.18748	0.419678	0.768425	0.0260333	0.259432	6.18748	0.153246	0.4666	0.287666	0.745197
chr1	156591312	156591654	30.3533	0.0241585	0.232748	0.8288	0.975626	30.3533	-0.021261	0.21098	0.815724	0.960706	30.3533	-0.0447478	0.226403	0.653394	0.934283
chr1	156591797	156592341	48.8717	0.00989835	0.212885	0.929914	0.991964	48.8717	0.0134405	0.193451	0.885579	0.977257	48.8717	0.00498461	0.190083	0.955921	0.993369
chr1	156601229	156601888	44.2772	-0.0143465	0.211381	0.898731	0.988799	44.2772	-0.0591277	0.199801	0.536615	0.882112	44.2772	-0.0455821	0.199956	0.625391	0.925565
chr1	156658587	156658757	3.36166	-0.0771147	0.423815	0.489991	NA	3.36166	-0.16796	0.533132	0.14773	NA	3.36166	-0.0996159	0.48838	0.423751	NA
chr1	156659201	156659371	2.93517	-0.206437	0.562672	0.0975956	NA	2.93517	-0.248529	0.65423	0.0472239	NA	2.93517	-0.0476821	0.492549	0.656671	NA
chr1	156659692	156661513	112.527	-1.10826	0.281715	2.90979e-06	0.000204909	112.527	-0.438206	0.274764	0.00300289	0.0640175	112.527	0.204733	0.230372	0.0758095	0.402746
chr1	156661638	156662532	54.5873	-0.935198	0.466248	0.00071208	0.0193352	54.5873	-0.174705	0.232999	0.116394	0.545889	54.5873	0.278027	0.337333	0.0624793	0.360748
chr1	156662705	156663268	19.19	-0.447425	0.541689	0.0302809	0.258107	19.19	-0.523949	0.622651	0.0168304	0.196549	19.19	-0.0231307	0.269905	0.83199	0.974386
chr1	156663524	156663794	8.1248	-0.691465	0.873329	0.00674005	0.0975706	8.1248	-0.0743602	0.328897	0.457276	0.847294	8.1248	0.463847	0.74741	0.0341856	0.251413
chr1	156664899	156665115	7.73456	-0.276039	0.540909	0.091072	0.47607	7.73456	-0.0670081	0.323586	0.497113	0.865275	7.73456	0.150572	0.444519	0.294805	0.752143
chr1	156665338	156665581	6.36068	-0.108701	0.40116	0.377434	NA	6.36068	-0.0784317	0.359918	0.441567	0.839247	6.36068	0.0150412	0.374734	0.902902	0.98386
chr1	156725673	156725877	5.99447	-0.153797	0.442268	0.244793	NA	5.99447	-0.156208	0.452295	0.19609	0.66295	5.99447	-0.0152518	0.381397	0.901703	0.983609
chr1	156726415	156726585	7.87163	-0.00932709	0.327955	0.933879	0.992061	7.87163	-0.0766521	0.342804	0.448147	0.842063	7.87163	-0.0874603	0.383067	0.500779	0.879808
chr1	156728098	156728308	16.428	-0.121627	0.328432	0.331188	0.786981	16.428	-0.00553438	0.243974	0.950735	0.988235	16.428	0.115979	0.336338	0.361307	0.800888
chr1	156728483	156728775	29.5785	-0.0187284	0.233837	0.866591	0.983409	29.5785	0.0291354	0.211408	0.750642	0.948601	29.5785	0.0485948	0.228451	0.627886	0.925933
chr1	156728997	156729308	25.7197	0.138701	0.286393	0.268498	0.734484	25.7197	0.00316884	0.218177	0.971926	0.993583	25.7197	-0.129177	0.293873	0.28216	0.739967
chr1	156740640	156741057	33.907	0.0847	0.241463	0.466784	0.866288	33.907	0.0944599	0.229402	0.339369	0.783127	33.907	0.0211259	0.207534	0.823275	0.971773
chr1	156741505	156741800	22.4983	0.0107998	0.248642	0.922454	0.991504	22.4983	-0.0220881	0.225871	0.806712	0.958897	22.4983	-0.0354644	0.245604	0.732829	0.950359
chr1	156746445	156747194	75.3779	-0.131187	0.20328	0.274715	0.740271	75.3779	0.0302314	0.172226	0.757278	0.949853	75.3779	0.150516	0.225061	0.16125	0.593924
chr1	156747319	156749685	190.756	-0.0838442	0.150438	0.4531	0.859866	190.756	-0.155781	0.150221	0.130917	0.571695	190.756	-0.0576636	0.131352	0.451173	0.854027
chr1	156749765	156751510	170.635	-0.0224794	0.151761	0.840387	0.978442	170.635	0.00804562	0.142133	0.935168	0.985463	170.635	0.0207078	0.123656	0.77722	0.960716
chr1	156751915	156752461	57.9208	0.340525	0.319845	0.0307793	0.261394	57.9208	0.174097	0.235634	0.117902	0.549233	57.9208	-0.0551805	0.185651	0.541307	0.897489
chr1	156766648	156767123	53.3053	0.0326307	0.204945	0.774152	0.963408	53.3053	0.0640699	0.191927	0.509315	0.87117	53.3053	0.0328281	0.182393	0.711374	0.945225
chr1	156767565	156768137	54.3914	0.192453	0.249314	0.138225	0.574715	54.3914	0.136973	0.21775	0.193118	0.659007	54.3914	-0.0164804	0.175874	0.84941	0.977066
chr1	156813615	156813990	12.5091	0.0223701	0.285802	0.841622	0.978442	12.5091	-0.140138	0.361829	0.218571	0.685143	12.5091	-0.22813	0.454055	0.154988	0.582677
chr1	15683834	15684260	38.926	0.119691	0.246039	0.321105	0.779674	38.926	0.134766	0.24319	0.201746	0.66881	38.926	0.0258725	0.199386	0.78015	0.961695
chr1	15684638	15685018	19.6661	0.0993911	0.286159	0.405927	0.83724	19.6661	0.00499137	0.231952	0.955532	0.988712	19.6661	-0.0895786	0.286329	0.436891	0.846213
chr1	156894559	156894826	9.53304	-0.299521	0.524582	0.0802522	0.445425	9.53304	-0.963475	0.983362	0.00426184	0.0810993	9.53304	-0.187637	0.474512	0.219435	0.674475
chr1	156895125	156895651	21.979	-0.669237	0.635455	0.0103995	0.131301	21.979	-2.11506	0.663354	2.88475e-05	0.00198089	21.979	-0.338111	0.52072	0.0751875	0.401072
chr1	156895768	156896089	11.0553	-0.223101	0.436482	0.138514	0.575018	11.0553	-1.10701	0.981787	0.00284898	0.061743	11.0553	-0.293422	0.54985	0.105158	0.480852
chr1	156896255	156898299	64.7816	-1.83861	0.346835	1.89391e-08	2.58292e-06	64.7816	-2.64846	0.373658	1.1009e-13	1.38189e-10	64.7816	-0.362409	0.40487	0.0403751	0.278464
chr1	156898518	156898875	12.5934	-0.320838	0.519426	0.0695024	0.413829	12.5934	-1.67023	1.03047	0.000504801	0.0183986	12.5934	-0.385126	0.631956	0.0614996	0.357326
chr1	156900790	156901027	4.8857	-0.0255776	0.363645	0.819238	NA	4.8857	-0.0982223	0.403535	0.354346	0.793758	4.8857	-0.0917529	0.429287	0.485038	0.872413
chr1	156927576	156927746	7.06183	0.000369369	0.329114	0.997376	0.999299	7.06183	-0.0890854	0.359414	0.390996	0.815549	7.06183	-0.116632	0.41031	0.39089	0.818095
chr1	157045343	157045801	26.2524	0.0774485	0.25488	0.503419	0.881754	26.2524	0.00895354	0.216966	0.920949	0.983376	26.2524	-0.059627	0.243776	0.567305	0.907232
chr1	1573727	1574610	75.6781	0.0965484	0.195604	0.410788	0.839897	75.6781	0.058896	0.176699	0.550239	0.888543	75.6781	-0.019025	0.160093	0.818601	0.971032
chr1	1574631	1574907	20.2489	0.0196764	0.263851	0.859648	0.981207	20.2489	0.0486896	0.245828	0.598504	0.903328	20.2489	0.0373932	0.261499	0.72798	0.949345
chr1	1575020	1575531	31.3305	0.433719	0.45407	0.024696	0.22714	31.3305	0.0404958	0.217117	0.660411	0.924665	31.3305	-0.301218	0.39896	0.068026	0.378699
chr1	15798774	15799075	18.9482	0.170728	0.342004	0.204321	0.671594	18.9482	0.0603935	0.253824	0.520912	0.87613	18.9482	-0.0712316	0.276098	0.524632	0.88958
chr1	157993429	157994394	89.6122	0.00640028	0.179602	0.955405	0.994621	89.6122	0.00228246	0.165941	0.981473	0.995746	89.6122	-0.0026444	0.150283	0.973741	0.99665
chr1	15799428	15800001	34.3011	0.392174	0.422881	0.0307756	0.261394	34.3011	0.217392	0.322913	0.0831452	0.472472	34.3011	-0.0427435	0.212469	0.657043	0.935517
chr1	157996520	157996718	6.20491	-0.144072	0.430005	0.269238	NA	6.20491	-0.0615054	0.337482	0.532509	0.880481	6.20491	0.0631753	0.388754	0.619567	0.923722
chr1	158002256	158002885	43.1197	0.00679533	0.214429	0.951787	0.994016	43.1197	-0.00724677	0.194782	0.937908	0.985711	43.1197	-0.012587	0.193396	0.89004	0.982293
chr1	158003086	158003800	29.6973	-0.136559	0.275131	0.272088	0.737609	29.6973	-0.0346447	0.211942	0.706659	0.937965	29.6973	0.0771856	0.247906	0.466702	0.861504
chr1	158007297	158007583	11.8641	-0.12245	0.351877	0.33256	0.78769	11.8641	-0.168528	0.399372	0.168043	0.630709	11.8641	-0.048661	0.32141	0.683562	0.941054
chr1	158007969	158008727	46.3685	-0.170451	0.253661	0.181326	0.641593	46.3685	-0.0411428	0.192805	0.664874	0.926302	46.3685	0.0927008	0.224776	0.362423	0.801834
chr1	158008897	158010359	111.279	-0.202289	0.201065	0.10553	0.5085	111.279	0.00424898	0.160431	0.965739	0.991961	111.279	0.184123	0.221487	0.0960806	0.458227
chr1	158010469	158011752	105.13	-0.0209681	0.179481	0.854775	0.980612	105.13	-0.00697346	0.165591	0.943477	0.986677	105.13	0.00906068	0.150362	0.910261	0.984912
chr1	158013213	158013522	9.65964	-0.0853457	0.338993	0.476053	0.870034	9.65964	-0.0887243	0.327384	0.38544	0.812868	9.65964	-0.0178495	0.323207	0.880314	0.98093
chr1	158016532	158016791	16.5752	0.0163033	0.267692	0.883476	0.986623	16.5752	-0.0102707	0.240342	0.908756	0.980867	16.5752	-0.0283292	0.266953	0.794004	0.965893
chr1	158017148	158019837	155.898	-0.253858	0.184494	0.0411294	0.310074	155.898	-0.0243654	0.146357	0.80622	0.958755	155.898	0.189463	0.19553	0.0713553	0.389697
chr1	158019943	158020391	25.3517	-0.0710085	0.26424	0.537744	0.895794	25.3517	0.173837	0.315022	0.13688	0.582194	25.3517	0.433409	0.508812	0.0371241	0.265495
chr1	15832987	15833210	15.0203	0.0372439	0.278535	0.74072	0.955599	15.0203	-0.0389076	0.256839	0.671648	0.928808	15.0203	-0.0909914	0.313632	0.451089	0.853986
chr1	15833827	15834332	41.0597	0.0834159	0.225031	0.473175	0.868863	41.0597	-0.0757708	0.210119	0.43372	0.835842	41.0597	-0.194037	0.302637	0.134505	0.544491
chr1	15834435	15835828	208.31	0.0760031	0.146076	0.491539	0.878557	208.31	0.263131	0.161804	0.0163225	0.192852	208.31	0.158068	0.161343	0.0882163	0.438441
chr1	15836065	15836617	46.182	0.0989277	0.225217	0.401074	0.834906	46.182	0.0954025	0.209582	0.337456	0.782162	46.182	0.0101954	0.185487	0.908885	0.984666
chr1	15847067	15847511	37.3854	-0.0198317	0.219547	0.859789	0.981207	37.3854	-0.0744156	0.213231	0.44028	0.838784	37.3854	-0.057996	0.217291	0.553921	0.901914
chr1	15847870	15848952	76.1463	0.0805796	0.192716	0.488869	0.87674	76.1463	0.0683097	0.177385	0.490838	0.863897	76.1463	-0.000598938	0.157866	0.994189	0.998611
chr1	15849122	15849394	16.2196	0.0977345	0.30454	0.416345	0.842856	16.2196	0.0398078	0.253188	0.664345	0.926084	16.2196	-0.0423724	0.274581	0.701267	0.94367
chr1	15849577	15849901	16.3427	0.00632767	0.274206	0.954612	0.994284	16.3427	0.0127472	0.245905	0.887106	0.977257	16.3427	0.00920278	0.271076	0.932789	0.989515
chr1	15849914	15850060	7.04691	0.107307	0.393665	0.384068	0.822824	7.04691	0.104699	0.382336	0.330563	0.777987	7.04691	0.0121271	0.347853	0.920432	0.987068
chr1	15949412	15949597	8.27032	-0.0889702	0.375982	0.459213	0.862988	8.27032	0.00678773	0.302119	0.941536	0.986315	8.27032	0.109405	0.407226	0.416198	0.832877
chr1	159924625	159925398	43.4702	-0.0628091	0.222414	0.583436	0.91364	43.4702	0.0984526	0.213809	0.323606	0.774877	43.4702	0.199711	0.303491	0.126235	0.527833
chr1	160205387	160205979	35.4096	-0.0397711	0.229103	0.72406	0.951849	35.4096	0.01739	0.203626	0.849941	0.970032	35.4096	0.0535733	0.221666	0.587785	0.915717
chr1	160261818	160262433	65.7223	0.115412	0.207871	0.332335	0.787552	65.7223	0.0993286	0.191345	0.324602	0.775604	65.7223	0.000840084	0.16537	0.99203	0.998424
chr1	160262651	160263011	39.5393	0.0680039	0.229687	0.55356	0.902627	39.5393	0.155829	0.257112	0.155411	0.611913	39.5393	0.0842284	0.229145	0.409794	0.829318
chr1	160284784	160285087	23.7904	0.197027	0.335829	0.155064	0.603127	23.7904	0.0591155	0.236996	0.527962	0.878493	23.7904	-0.0892178	0.268372	0.422994	0.837106
chr1	160342591	160342880	12.378	-0.0806274	0.316845	0.495878	0.879893	12.378	-0.00611671	0.256704	0.94582	0.986975	12.378	0.074345	0.321578	0.538769	0.896096
chr1	160342929	160343168	18.9066	-0.0267033	0.266393	0.810933	0.97118	18.9066	0.0788329	0.261815	0.416201	0.829302	18.9066	0.133486	0.328663	0.295027	0.752262
chr1	160343334	160343601	18.3547	0.00429279	0.262549	0.969126	0.996677	18.3547	0.0382996	0.241016	0.674977	0.929575	18.3547	0.0409055	0.26344	0.70494	0.944284
chr1	16087706	16087876	6.37101	-0.097909	0.388411	0.420219	NA	6.37101	-0.0961618	0.376699	0.362919	0.799485	6.37101	-0.0121362	0.370349	0.921425	0.987272
chr1	16088048	16088611	25.6059	-0.217064	0.341405	0.127613	0.555704	25.6059	-0.179627	0.316234	0.128045	0.569317	25.6059	0.00141456	0.233496	0.98879	0.998277
chr1	161045418	161045969	42.8245	0.0882905	0.225766	0.44952	0.858046	42.8245	0.0430307	0.198063	0.648378	0.92095	42.8245	-0.0277629	0.193742	0.761209	0.957094
chr1	161046047	161046624	50.8427	0.185922	0.251979	0.150443	0.594983	50.8427	0.0628755	0.195742	0.514809	0.873148	50.8427	-0.0762995	0.204867	0.426962	0.839926
chr1	161097939	161098197	10.998	0.0131104	0.298449	0.906832	0.989909	10.998	-0.0510415	0.288807	0.589808	0.902292	10.998	-0.081236	0.33934	0.513422	0.885793
chr1	161117515	161118017	35.7249	0.131157	0.261378	0.28555	0.74813	35.7249	0.13516	0.254639	0.202611	0.669489	35.7249	0.018919	0.206224	0.840899	0.974998
chr1	161118143	161118507	30.0273	0.023103	0.232524	0.836125	0.977132	30.0273	-0.0176013	0.210313	0.846826	0.969194	30.0273	-0.0395512	0.223865	0.689217	0.94179
chr1	161132266	161132608	23.5508	0.0857696	0.267121	0.463662	0.865201	23.5508	0.0786522	0.24576	0.415004	0.829184	23.5508	0.00781831	0.23148	0.937823	0.991135
chr1	161132694	161133822	91.7581	-0.125394	0.18943	0.291156	0.751573	91.7581	0.00994606	0.164068	0.919626	0.983224	91.7581	0.109675	0.187823	0.246733	0.706647
chr1	161153457	161154307	83.2569	-0.0520353	0.18586	0.651528	0.931749	83.2569	0.0202252	0.169095	0.836546	0.966777	83.2569	0.056651	0.167693	0.51048	0.88495
chr1	161158930	161159346	21.8402	-0.0243384	0.251238	0.827003	0.97511	21.8402	-0.0554651	0.238292	0.551777	0.889043	21.8402	-0.0392927	0.250418	0.708459	0.945003
chr1	161159550	161159817	28.4853	0.0863593	0.254867	0.459587	0.862999	28.4853	0.1128	0.254114	0.269943	0.731968	28.4853	0.03557	0.224462	0.719213	0.947502
chr1	161166017	161166185	10.2559	0.0654126	0.324899	0.575092	0.911292	10.2559	0.0679074	0.304685	0.487083	0.862399	10.2559	0.0152314	0.307237	0.895555	0.982937
chr1	161201199	161201594	24.8878	-0.0993449	0.269051	0.403199	0.83576	24.8878	-0.0219068	0.218091	0.809079	0.959437	24.8878	0.0636095	0.252274	0.549758	0.900341
chr1	16120162	16120396	5.23353	-0.0290128	0.357305	0.796645	NA	5.23353	-0.284208	0.63614	0.0621544	0.410711	5.23353	-0.276389	0.610707	0.102431	0.473819
chr1	161201690	161202159	49.6836	-0.162944	0.255825	0.198494	0.664361	49.6836	-0.0438708	0.196564	0.642966	0.919357	49.6836	0.0835534	0.223661	0.407533	0.828074
chr1	16121957	16122542	23.4061	-0.271696	0.391526	0.0836195	0.45468	23.4061	-0.191672	0.335517	0.115828	0.544749	23.4061	0.01796	0.242674	0.861472	0.978389
chr1	161225427	161225631	9.32394	0.011751	0.309448	0.916638	0.990483	9.32394	-0.0734416	0.320244	0.460097	0.848335	9.32394	-0.111457	0.379007	0.400838	0.823698
chr1	161226074	161226496	24.5082	-0.0191605	0.245265	0.863205	0.982182	24.5082	-0.148173	0.302678	0.182695	0.646326	24.5082	-0.148189	0.323437	0.247351	0.707512
chr1	16123404	16123758	11.9951	-0.349932	0.550391	0.0582012	0.377731	11.9951	-0.0778245	0.295634	0.429809	0.834433	11.9951	0.164379	0.412046	0.254532	0.713273
chr1	16123919	16124286	11.9683	-0.0786209	0.313964	0.505303	0.882536	11.9683	-0.254789	0.489612	0.0842394	0.475294	11.9683	-0.149486	0.395162	0.285493	0.743542
chr1	16124412	16124721	9.37058	-0.140995	0.3875	0.281428	0.745114	9.37058	-0.117199	0.360223	0.283456	0.744076	9.37058	0.00162999	0.328266	0.989076	0.998277
chr1	161313926	161314236	25.1869	0.135356	0.290654	0.279295	0.744232	25.1869	0.102905	0.258984	0.307039	0.762404	25.1869	-0.00660501	0.22697	0.946887	0.992238
chr1	161314457	161314827	39.7303	0.299835	0.34691	0.0549798	0.365723	39.7303	0.149608	0.254472	0.167965	0.630709	39.7303	-0.0529491	0.208064	0.579603	0.911961
chr1	161389557	161389945	25.134	-0.16458	0.312289	0.209786	0.677194	25.134	0.0296268	0.218431	0.745169	0.947213	25.134	0.241775	0.389808	0.11526	0.503615
chr1	161390427	161390572	9.51357	0.0943456	0.356295	0.437328	0.852289	9.51357	0.077145	0.3267	0.441999	0.839308	9.51357	-0.00140516	0.31944	0.990484	0.998407
chr1	161398686	161400223	206.392	0.0151168	0.145745	0.890798	0.987591	206.392	0.0941805	0.139809	0.344576	0.786505	206.392	0.0607722	0.127799	0.421285	0.836282
chr1	16141515	16141762	7.95442	-0.095979	0.363522	0.430571	0.849522	7.95442	-0.118134	0.377971	0.284248	0.744636	7.95442	-0.0342229	0.349827	0.779681	0.96162
chr1	161440508	161440834	24.2195	0.0565957	0.256864	0.618431	0.923945	24.2195	0.182638	0.32639	0.12618	0.565391	24.2195	0.122712	0.29356	0.304158	0.760626
chr1	16144103	16144533	26.2317	-0.400344	0.482932	0.0360574	0.287658	26.2317	-0.10583	0.261059	0.296228	0.754457	26.2317	0.134694	0.315747	0.281667	0.739504
chr1	16144671	16146387	125.481	-0.400252	0.249901	0.00714866	0.101824	125.481	0.18247	0.172941	0.0900738	0.488056	125.481	0.96884	0.259701	1.34216e-05	0.000706681
chr1	16146516	16147744	74.9516	-0.277492	0.259351	0.0481734	0.338765	74.9516	-0.0520941	0.175271	0.596367	0.903127	74.9516	0.162141	0.236302	0.145238	0.565333
chr1	16148048	16148218	6.23945	-0.0431908	0.353539	0.704947	NA	6.23945	-0.00624996	0.309634	0.946368	0.98701	6.23945	0.0387723	0.367903	0.754683	0.954904
chr1	16149868	16150107	4.27492	-0.274144	0.604535	0.0656216	NA	4.27492	-0.164854	0.495697	0.173596	NA	4.27492	0.0718976	0.455932	0.562911	NA
chr1	16150343	16150979	21.8552	-0.543025	0.577134	0.0179872	0.186155	21.8552	-0.135145	0.292398	0.211353	0.678864	21.8552	0.152955	0.342542	0.247545	0.707596
chr1	16151072	16151408	16.5897	-0.492358	0.609965	0.0261779	0.235804	16.5897	-0.0476294	0.252465	0.606652	0.907491	16.5897	0.323994	0.514883	0.0821923	0.420557
chr1	16151576	16156044	321.32	-1.21885	0.165467	5.25413e-14	2.11146e-11	321.32	-0.125826	0.124561	0.190224	0.656282	321.32	1.00574	0.168592	3.65974e-10	7.17789e-08
chr1	161524035	161524536	33.3199	0.0452562	0.230277	0.688691	0.941741	33.3199	-0.000686332	0.204868	0.994007	0.998715	33.3199	-0.0397196	0.216078	0.682325	0.941054
chr1	161530655	161531588	51.4588	-0.341403	0.335253	0.0332317	0.273961	51.4588	-0.0730756	0.194387	0.45468	0.845942	51.4588	0.166225	0.26909	0.162411	0.596021
chr1	161539895	161540092	12.3842	-0.26101	0.477966	0.104684	0.507019	12.3842	-0.0433617	0.272565	0.640853	0.918511	12.3842	0.171514	0.416834	0.240087	0.698075
chr1	1615437	1616134	111.116	0.184297	0.191319	0.132125	0.563922	111.116	0.0829853	0.164946	0.411071	0.826911	111.116	-0.0569308	0.152773	0.489539	0.874893
chr1	16156203	16156563	20.9594	-0.533451	0.618444	0.0210435	0.205926	20.9594	0.114185	0.283238	0.271445	0.733632	20.9594	1.4005	0.740412	0.000894165	0.020216
chr1	161611695	161612381	30.9445	-0.22791	0.32824	0.110772	0.520365	30.9445	-0.121593	0.250229	0.240561	0.705029	30.9445	0.0435359	0.227917	0.66321	0.93686
chr1	161612649	161613045	19.5239	-0.226944	0.384607	0.125586	0.551909	19.5239	-0.0641057	0.247609	0.497186	0.865275	19.5239	0.104545	0.30659	0.38548	0.814926
chr1	16167268	16168012	54.6375	-0.172142	0.241618	0.174432	0.631859	54.6375	0.0538165	0.187009	0.578334	0.898054	54.6375	0.283605	0.329774	0.0562619	0.338683
chr1	16172946	16174249	88.9811	-0.275836	0.25583	0.0483322	0.339402	88.9811	0.816599	0.373729	0.000259244	0.0113464	88.9811	1.52786	0.296288	3.25415e-08	3.68659e-06
chr1	16174336	16174528	13.4305	0.0322328	0.296731	0.775096	0.963471	13.4305	0.25191	0.466281	0.0830739	0.472211	13.4305	0.231563	0.443512	0.147535	0.569646
chr1	16174820	16175164	17.6919	-0.207675	0.403096	0.153965	0.60087	17.6919	0.172073	0.352915	0.150104	0.604366	17.6919	0.966386	0.755921	0.00517691	0.0722789
chr1	161749791	161750264	51.5081	0.186384	0.252652	0.149806	0.59371	51.5081	0.0110791	0.189646	0.906226	0.980329	51.5081	-0.151955	0.25611	0.184398	0.629524
chr1	16175464	16176045	59.5023	-0.100623	0.212107	0.393357	0.829597	59.5023	0.161435	0.218115	0.137312	0.583004	59.5023	0.418381	0.372783	0.0200758	0.180983
chr1	16176151	16177159	58.2453	-0.134502	0.226477	0.268536	0.734505	58.2453	0.133856	0.210251	0.201154	0.66798	58.2453	0.44957	0.392596	0.0177222	0.166509
chr1	161764728	161765281	43.9049	0.0743165	0.21975	0.520149	0.890148	43.9049	-0.0725879	0.205856	0.452751	0.844592	43.9049	-0.169632	0.280865	0.164126	0.598501
chr1	161765477	161766148	45.1928	-0.00910747	0.211652	0.935551	0.992555	45.1928	0.0757602	0.202163	0.436447	0.836702	45.1928	0.0853927	0.218465	0.392232	0.819047
chr1	16178589	16178884	9.55823	-0.165968	0.431341	0.22367	0.693384	9.55823	0.16246	0.403882	0.180079	0.643698	9.55823	0.713759	0.815569	0.0139737	0.142327
chr1	16180321	16180514	5.45702	-0.203751	0.508329	0.148357	NA	5.45702	-0.0494447	0.34092	0.610331	0.909265	5.45702	0.134568	0.465269	0.33374	0.783822
chr1	16181009	16183127	138.646	-1.20522	0.257187	2.41769e-07	2.35062e-05	138.646	0.198736	0.170673	0.0666418	0.423509	138.646	1.60609	0.242221	4.9341e-12	1.45228e-09
chr1	16206186	16206403	13.1937	-0.0173805	0.291048	0.876595	0.985027	13.1937	0.0965056	0.30544	0.344722	0.786505	13.1937	0.150433	0.376011	0.274043	0.734267
chr1	16206787	16207653	83.6216	0.0305936	0.187778	0.789495	0.966597	83.6216	0.0860469	0.179428	0.391117	0.815549	83.6216	0.0504218	0.168101	0.557161	0.902973
chr1	162069379	162069557	7.89537	-0.000179932	0.322147	0.998722	0.999816	7.89537	-0.0281012	0.298891	0.763164	0.951839	7.89537	-0.0362799	0.342238	0.765472	0.957592
chr1	16207751	16208404	50.3836	0.389813	0.379764	0.0254251	0.231165	50.3836	0.0397593	0.199534	0.671959	0.928989	50.3836	-0.274229	0.346243	0.0683527	0.379575
chr1	162134111	162134829	45.3424	0.127424	0.237606	0.293285	0.753706	45.3424	0.0637246	0.201972	0.506651	0.870032	45.3424	-0.0359849	0.194385	0.694796	0.942761
chr1	162135578	162136868	111.69	0.152596	0.182977	0.2017	0.668484	111.69	0.125975	0.16964	0.223945	0.689871	111.69	-0.00526749	0.139067	0.945763	0.991874
chr1	162137044	162137988	98.3307	0.0294241	0.180676	0.79751	0.968269	98.3307	-0.0139433	0.166937	0.887133	0.977257	98.3307	-0.0327396	0.15553	0.69017	0.94187
chr1	162138007	162138458	28.5321	0.0731909	0.250863	0.525285	0.891296	28.5321	-0.0434592	0.223318	0.637123	0.917297	28.5321	-0.133975	0.296921	0.269093	0.729854
chr1	162138573	162138885	19.5263	-0.0768651	0.276987	0.508653	0.884742	19.5263	-0.038056	0.236934	0.676801	0.930762	19.5263	0.0263416	0.256178	0.803928	0.967773
chr1	162139080	162139479	20.8189	-0.0353598	0.260135	0.752237	0.958746	20.8189	-0.0127756	0.229568	0.886794	0.977257	20.8189	0.018281	0.250457	0.861398	0.978388
chr1	162140497	162141725	62.3094	-0.215653	0.251243	0.104145	0.50608	62.3094	-0.0551311	0.184116	0.571114	0.896473	62.3094	0.108054	0.216842	0.285825	0.743574
chr1	162141834	162142720	46.696	-0.186801	0.268813	0.153705	0.60053	46.696	0.00212276	0.191729	0.981894	0.99577	46.696	0.182885	0.292255	0.146681	0.567639
chr1	162144471	162145967	97.9885	-0.431226	0.298989	0.00834686	0.113067	97.9885	-0.0885283	0.172593	0.380575	0.809161	97.9885	0.216449	0.252042	0.0755773	0.402254
chr1	162146220	162146473	15.3434	-0.0506019	0.28885	0.656991	0.934072	15.3434	0.0645827	0.267384	0.497306	0.865275	15.3434	0.151878	0.365148	0.264264	0.724338
chr1	16236726	16237108	27.1127	-0.00799916	0.24102	0.942559	0.992835	27.1127	0.0204479	0.217259	0.821529	0.96227	27.1127	0.0298402	0.231738	0.766628	0.957766
chr1	16237309	16237490	16.7401	0.0122932	0.272424	0.912001	0.990224	16.7401	0.107002	0.294757	0.300058	0.757377	16.7401	0.114607	0.321877	0.356513	0.798721
chr1	162497717	162498516	58.1541	0.0287703	0.202013	0.800394	0.969274	58.1541	0.0298025	0.184862	0.755283	0.949169	58.1541	0.00493981	0.174962	0.954445	0.99318
chr1	162536464	162536994	21.2328	-0.150275	0.310512	0.243219	0.712611	21.2328	-0.287054	0.437574	0.0560289	0.390721	21.2328	-0.0853715	0.285563	0.457015	0.856663
chr1	162537589	162539346	136.227	-0.167294	0.178201	0.161315	0.612645	136.227	-0.0302883	0.153251	0.760943	0.950683	136.227	0.0966464	0.163753	0.270597	0.731279
chr1	162539425	162540269	56.3606	-0.263215	0.299079	0.0687086	0.411346	56.3606	-0.134115	0.223503	0.201238	0.668074	56.3606	0.0520482	0.200558	0.578796	0.911961
chr1	162540790	162542694	100.049	-0.435384	0.281713	0.00640768	0.0941166	100.049	-0.134469	0.175086	0.197625	0.664795	100.049	0.151108	0.207877	0.144637	0.564529
chr1	162548108	162548573	30.0627	0.113413	0.268847	0.347558	0.797885	30.0627	-0.0316531	0.220374	0.728515	0.943227	30.0627	-0.167587	0.323079	0.198568	0.64828
chr1	162560943	162561360	46.6009	0.236826	0.289433	0.0903917	0.474244	46.6009	0.161916	0.24588	0.141274	0.588675	46.6009	-0.0207653	0.186051	0.816227	0.970885
chr1	162561651	162562389	66.2541	0.0381026	0.195994	0.739199	0.955228	66.2541	-0.0558111	0.183601	0.566865	0.894801	66.2541	-0.0859568	0.197816	0.365892	0.804516
chr1	162563443	162563727	12.6674	-0.159209	0.36938	0.235016	0.704356	12.6674	-0.183355	0.39964	0.143862	0.593081	12.6674	-0.0309961	0.301711	0.788259	0.963538
chr1	162566050	162566220	4.86884	-0.192972	0.504225	0.159936	NA	4.86884	-0.131	0.441317	0.249253	0.713689	4.86884	0.035099	0.412479	0.777122	0.960716
chr1	162612509	162612765	15.1058	0.00816982	0.285154	0.941598	0.992733	15.1058	0.0353796	0.261631	0.699583	0.936732	15.1058	0.0352716	0.289926	0.755657	0.955129
chr1	162613033	162613757	39.1843	-0.230731	0.314405	0.103848	0.505406	39.1843	-0.126817	0.242908	0.223807	0.689765	39.1843	0.0410674	0.216483	0.672593	0.939199
chr1	162632428	162632922	23.9357	0.0030274	0.243827	0.978223	0.998345	23.9357	-0.158166	0.312712	0.164478	0.625406	23.9357	-0.202828	0.367823	0.157784	0.587498
chr1	162678084	162678531	19.8588	-0.532871	0.596779	0.0201841	0.20051	19.8588	-0.0454734	0.237484	0.621274	0.913027	19.8588	0.358702	0.511314	0.0634949	0.363933
chr1	162678621	162679070	21.5881	-0.291093	0.428287	0.0765013	0.434637	21.5881	0.0319843	0.226053	0.725113	0.94211	21.5881	0.46495	0.549742	0.0345799	0.253421
chr1	162686964	162687500	17.5879	-0.75288	0.697224	0.00804874	0.110268	17.5879	-0.217846	0.391478	0.0986721	0.507521	17.5879	0.142266	0.35628	0.286135	0.743574
chr1	162687636	162688016	18.4746	-0.432316	0.546922	0.0339242	0.277093	18.4746	-0.102928	0.281571	0.31192	0.765774	18.4746	0.155363	0.361563	0.252987	0.712994
chr1	162688134	162688429	14.163	-0.341331	0.520808	0.0604229	0.386327	14.163	-0.174543	0.382301	0.153671	0.610038	14.163	0.0569461	0.312277	0.630252	0.926581
chr1	162688976	162689784	27.13	-1.51728	0.600485	0.000177334	0.00652608	27.13	-0.312002	0.413231	0.0405646	0.329068	27.13	0.330476	0.46115	0.0676082	0.377652
chr1	162690044	162691010	63.4397	-1.21014	0.425377	9.26375e-05	0.00373774	63.4397	0.0199421	0.179418	0.835866	0.966621	63.4397	1.30793	0.385315	3.945e-05	0.00167295
chr1	162691202	162692708	78.487	-1.24173	0.342871	1.13522e-05	0.000670893	78.487	-0.2381	0.233497	0.0464409	0.353643	78.487	0.45407	0.363537	0.0135847	0.139405
chr1	162694390	162694611	7.97589	-0.409277	0.653635	0.0380619	0.296737	7.97589	-0.153745	0.417874	0.199475	0.665889	7.97589	0.117923	0.421386	0.387846	0.816169
chr1	162695271	162695458	11.4569	-0.0506209	0.306219	0.658567	0.93452	11.4569	-0.0306633	0.270088	0.738225	0.945253	11.4569	0.0127149	0.301538	0.911976	0.985236
chr1	162695974	162696442	30.2038	-0.0258074	0.232405	0.817445	0.972673	30.2038	-0.0543743	0.218308	0.561264	0.892005	30.2038	-0.0342262	0.222638	0.728168	0.949345
chr1	162696605	162697485	54.6127	-0.209091	0.258774	0.115349	0.531208	54.6127	-0.0469772	0.18728	0.625535	0.914295	54.6127	0.114407	0.228578	0.273465	0.733574
chr1	162752347	162753443	44.4961	-2.06054	0.424901	1.12571e-07	1.21609e-05	44.4961	-0.627837	0.503579	0.00466915	0.0862404	44.4961	0.743051	0.553209	0.00694981	0.088118
chr1	162753542	162753779	10.0168	-0.336711	0.562561	0.0628554	0.394185	10.0168	-0.0522986	0.287864	0.581008	0.898956	10.0168	0.212834	0.473339	0.179951	0.623574
chr1	162753855	162755866	90.2364	-2.12915	0.295618	7.22399e-14	2.82768e-11	90.2364	-1.09251	0.320013	1.2941e-05	0.00109167	90.2364	0.886356	0.374035	0.000595472	0.0147022
chr1	162755998	162756531	27.3439	-1.34816	0.630751	0.00044661	0.0135505	27.3439	-0.200051	0.322155	0.101827	0.514562	27.3439	0.38796	0.492583	0.0484475	0.31097
chr1	162756781	162757735	47.286	-1.64823	0.429783	7.74847e-06	0.00048452	47.286	-0.196551	0.266734	0.0929114	0.495186	47.286	0.832694	0.528119	0.00374374	0.0571968
chr1	162757897	162758258	16.9165	-0.952972	0.763555	0.00386872	0.0668802	16.9165	-0.193676	0.372776	0.122669	0.559029	16.9165	0.227937	0.438371	0.150627	0.575117
chr1	162758391	162758640	9.72536	-0.989832	0.926748	0.00294371	0.0552106	9.72536	-0.284051	0.53582	0.0706507	0.435743	9.72536	0.22293	0.512327	0.168384	0.606038
chr1	162758854	162759100	8.11594	-0.594919	0.779854	0.0142265	0.160775	8.11594	-0.16228	0.41957	0.183163	0.647078	8.11594	0.192095	0.490357	0.211663	0.665085
chr1	162790036	162790319	16.1931	-0.113044	0.316006	0.358574	0.805314	16.1931	-0.0891506	0.284501	0.371059	0.803936	16.1931	0.00333673	0.274002	0.975735	0.996681
chr1	162791079	162791365	9.30447	-0.0597577	0.325737	0.606562	0.921414	9.30447	-0.112633	0.358022	0.298153	0.755581	9.30447	-0.0650484	0.347927	0.600294	0.919647
chr1	162798758	162798953	3.45846	-0.107463	0.453348	0.346628	NA	3.45846	0.0020891	0.358075	0.982145	NA	3.45846	0.127891	0.494806	0.335618	NA
chr1	162821821	162822213	20.2037	-0.014108	0.259547	0.898902	0.988799	20.2037	-0.309396	0.486744	0.0526352	0.378841	20.2037	-0.340804	0.502454	0.0706894	0.388109
chr1	162822346	162823068	52.982	-0.0405228	0.203484	0.722517	0.951459	52.982	-0.208148	0.260573	0.0783682	0.459677	52.982	-0.16441	0.262804	0.161419	0.594045
chr1	162823560	162823910	17.3843	-0.10985	0.306858	0.368507	0.812681	17.3843	-0.0645052	0.259054	0.496217	0.86509	17.3843	0.0245412	0.26901	0.821644	0.971677
chr1	162848698	162849199	18.2588	0.0627659	0.27345	0.583929	0.913896	18.2588	-0.119044	0.30591	0.261809	0.725332	18.2588	-0.285718	0.459902	0.097065	0.460427
chr1	162849580	162849764	7.63342	-0.033208	0.331972	0.769952	0.963084	7.63342	-0.0777603	0.341103	0.442092	0.839308	7.63342	-0.0594368	0.363381	0.63529	0.927906
chr1	162853906	162854077	15.7342	0.078002	0.292307	0.505133	0.882536	15.7342	-0.0384593	0.255356	0.674891	0.929575	15.7342	-0.144505	0.354334	0.278432	0.737719
chr1	162854445	162855946	189.561	-0.0647546	0.150117	0.56137	0.906736	189.561	0.0740246	0.141146	0.456862	0.847028	189.561	0.113482	0.151303	0.185931	0.631396
chr1	162855993	162856371	52.316	-0.0336864	0.211606	0.76623	0.961896	52.316	0.119422	0.21612	0.244994	0.708913	52.316	0.177941	0.277929	0.145827	0.566038
chr1	162856612	162859313	316.285	0.0119462	0.126141	0.907659	0.989909	316.285	0.0295304	0.120177	0.753419	0.948601	316.285	0.0127382	0.100169	0.844013	0.976049
chr1	162859428	162862607	322.949	0.0892403	0.126672	0.387758	0.825509	322.949	-0.0468198	0.120846	0.619488	0.912512	322.949	-0.104677	0.124783	0.173707	0.61393
chr1	162862641	162862901	15.5116	-0.0336479	0.273315	0.764202	0.961524	15.5116	-0.172146	0.369808	0.154507	0.611195	15.5116	-0.153344	0.367391	0.261612	0.720954
chr1	162873175	162873777	34.0862	-0.121696	0.258663	0.316155	0.775182	34.0862	0.0896186	0.222674	0.361567	0.798699	34.0862	0.323694	0.40517	0.0570232	0.341497
chr1	162874046	162875926	109.957	-0.506607	0.289533	0.00259792	0.0503221	109.957	-0.288773	0.223623	0.0193099	0.215095	109.957	0.058412	0.157296	0.484757	0.872309
chr1	162876135	162876818	56.2785	-0.00457059	0.200058	0.967882	0.996594	56.2785	-0.0695084	0.191295	0.476785	0.858661	56.2785	-0.0617183	0.192666	0.503849	0.881553
chr1	162877024	162878077	105.971	0.0186141	0.172894	0.870714	0.983707	105.971	-0.179232	0.189405	0.100085	0.510564	105.971	-0.210543	0.233796	0.07159	0.390391
chr1	162878313	162879519	115.265	0.0630582	0.170744	0.583172	0.91364	115.265	-0.135418	0.172111	0.194321	0.660455	115.265	-0.212708	0.226701	0.0654869	0.370719
chr1	162902629	162903262	18.7132	-0.0203211	0.256873	0.855022	0.980612	18.7132	-0.896197	0.794831	0.00468248	0.0863851	18.7132	-0.843129	0.725115	0.00804649	0.0975534
chr1	162905484	162906020	23.5737	0.081741	0.262466	0.482579	0.873782	23.5737	-0.689955	0.691912	0.0084984	0.127541	23.5737	-1.31117	0.684181	0.00102139	0.0222674
chr1	162906202	162906520	14.5789	0.0867858	0.299293	0.463871	0.865276	14.5789	-0.165891	0.37763	0.167617	0.630694	14.5789	-0.48009	0.613843	0.0368132	0.264416
chr1	162980872	162981042	8.71036	-0.06605	0.329556	0.571973	0.910703	8.71036	-0.631839	0.858848	0.0127429	0.165371	8.71036	-0.429547	0.682846	0.0472579	0.305963
chr1	162981122	162984909	259.28	-0.431442	0.179288	0.000735682	0.0198331	259.28	-0.596269	0.209439	2.51219e-05	0.00180814	259.28	-0.0603813	0.122284	0.413045	0.831693
chr1	162985046	162988070	221.277	-0.238361	0.154985	0.0387611	0.299862	221.277	-0.357263	0.180436	0.00251421	0.0571314	221.277	-0.072247	0.129919	0.346558	0.792434
chr1	162988195	162988877	67.5994	-0.240748	0.250184	0.0751554	0.430643	67.5994	-0.0336725	0.176055	0.729378	0.943332	67.5994	0.162003	0.241157	0.149426	0.572765
chr1	162988961	162989146	12.0774	-0.0306149	0.309228	0.786585	0.966085	12.0774	0.0482303	0.285421	0.608555	0.908358	12.0774	0.100094	0.354795	0.435374	0.845084
chr1	162991645	162991790	9.15984	-0.123912	0.382501	0.330074	0.786397	9.15984	0.00898583	0.280529	0.921644	0.98356	9.15984	0.153608	0.422644	0.283823	0.74222
chr1	163027882	163028311	26.0384	0.0448018	0.243615	0.690788	0.942125	26.0384	-0.100024	0.255585	0.317895	0.770217	26.0384	-0.192891	0.348232	0.163893	0.598177
chr1	163028671	163029234	38.9486	3.90929e-05	0.216594	0.999722	0.999907	38.9486	-0.081573	0.214021	0.402114	0.820785	38.9486	-0.0857779	0.230802	0.403456	0.825457
chr1	163029441	163034036	302.179	-0.0900342	0.128172	0.386642	0.825135	302.179	-0.710586	0.191163	7.66911e-07	0.000111937	302.179	-0.584624	0.180747	4.7361e-05	0.00193772
chr1	163035027	163035839	70.5249	-0.230944	0.24933	0.0851304	0.459497	70.5249	0.0167198	0.17598	0.862882	0.973157	70.5249	0.264042	0.30034	0.0580101	0.344827
chr1	163035990	163036869	59.9625	-0.371899	0.326872	0.0223173	0.213673	59.9625	-0.164341	0.220452	0.132144	0.573555	59.9625	0.0757978	0.199291	0.423532	0.83743
chr1	163036980	163037547	32.8189	-0.297011	0.369613	0.0614372	0.389675	32.8189	-0.0632475	0.21433	0.505176	0.869485	32.8189	0.149538	0.295569	0.222661	0.677468
chr1	163046349	163046722	15.4723	-0.0184083	0.272079	0.868757	0.983452	15.4723	-0.0534249	0.260084	0.567461	0.895015	15.4723	-0.0452963	0.282155	0.6862	0.941562
chr1	163047632	163047851	8.75074	-0.0624056	0.329952	0.591963	0.917515	8.75074	-0.1678	0.427504	0.174397	0.638443	8.75074	-0.110245	0.388363	0.408638	0.828662
chr1	163048207	163048649	27.638	0.0603856	0.245009	0.596046	0.918772	27.638	-0.0432686	0.221657	0.638809	0.917802	27.638	-0.115897	0.280454	0.317884	0.771562
chr1	163048727	163048918	15.2678	-0.0211978	0.277256	0.849415	0.98016	15.2678	-0.0447279	0.259556	0.628549	0.91504	15.2678	-0.0326149	0.282051	0.770344	0.958731
chr1	163049604	163050056	21.4438	0.108581	0.28175	0.368215	0.81259	21.4438	-0.15754	0.327311	0.169813	0.633487	21.4438	-0.538336	0.580924	0.0244048	0.204936
chr1	163068902	163069236	24.9572	0.113791	0.275129	0.347332	0.797885	24.9572	-0.190468	0.3458	0.120109	0.554287	24.9572	-0.658199	0.602365	0.0135257	0.139118
chr1	163069457	163071330	134.165	-0.00994193	0.161372	0.930071	0.991964	134.165	-0.135538	0.162366	0.191522	0.657905	134.165	-0.108339	0.16602	0.224825	0.68035
chr1	163071425	163071763	25.6506	-0.0534902	0.247905	0.636834	0.927753	25.6506	-0.0583473	0.229066	0.533331	0.881299	25.6506	-0.0147252	0.230502	0.882982	0.981207
chr1	163071921	163073037	71.1494	-0.0913189	0.195173	0.435321	0.851101	71.1494	-0.26743	0.261767	0.0346496	0.302796	71.1494	-0.141055	0.224817	0.184661	0.63015
chr1	163073159	163073431	16.5566	0.0512282	0.276419	0.651992	0.931858	16.5566	-0.034705	0.249145	0.70344	0.937164	16.5566	-0.100709	0.312729	0.406558	0.827371
chr1	163073553	163073923	16.1234	-0.0702872	0.283611	0.54379	0.897975	16.1234	-0.211995	0.404479	0.107852	0.527484	16.1234	-0.130195	0.34441	0.316422	0.7706
chr1	163074150	163075206	50.92	-0.0789552	0.215372	0.496238	0.879893	50.92	-0.255025	0.30434	0.0495631	0.366221	50.92	-0.147037	0.26071	0.20074	0.650564
chr1	163075386	163075859	23.7654	0.00735808	0.241998	0.947141	0.993566	23.7654	-0.234721	0.382481	0.080778	0.466208	23.7654	-0.320707	0.452609	0.0710785	0.38893
chr1	163076111	163076397	9.9737	0.0240872	0.313143	0.830909	0.975963	9.9737	-0.0766435	0.32564	0.444357	0.840392	9.9737	-0.134685	0.401139	0.330053	0.781718
chr1	163092846	163092991	7.50788	-0.178293	0.454756	0.198489	0.664361	7.50788	-0.0015465	0.295333	0.986607	0.996708	7.50788	0.197435	0.488532	0.203555	0.654753
chr1	163093073	163093243	12.2419	-0.0573001	0.301625	0.618465	0.923945	12.2419	-0.0955705	0.312983	0.350954	0.791866	12.2419	-0.0507943	0.310081	0.665836	0.937566
chr1	163093441	163093767	26.911	-0.0365295	0.243371	0.744465	0.956738	26.911	-0.0100983	0.215373	0.911032	0.981429	26.911	0.0215081	0.229275	0.829413	0.973717
chr1	163093876	163094334	32.6228	0.0713988	0.239592	0.534668	0.894561	32.6228	0.0586572	0.216479	0.533549	0.881299	32.6228	-0.000187117	0.208932	0.998425	0.999508
chr1	163167602	163168043	23.7794	-0.757512	0.666891	0.00727845	0.102992	23.7794	0.00106571	0.220431	0.99054	0.998078	23.7794	0.850242	0.680141	0.00695525	0.0881513
chr1	163168393	163168832	27.603	-0.298805	0.415122	0.0692275	0.413008	27.603	0.0640295	0.229803	0.497573	0.865281	27.603	0.657308	0.596184	0.0132872	0.137166
chr1	163170142	163171379	105.646	-0.172849	0.198322	0.158769	0.609202	105.646	-0.157731	0.187318	0.139954	0.586681	105.646	-0.00465621	0.150253	0.953781	0.99318
chr1	163171458	163174198	252.476	-0.162708	0.143286	0.140431	0.578696	252.476	-0.149177	0.136942	0.136124	0.580618	252.476	-0.000487972	0.11054	0.994334	0.998631
chr1	163174368	163175724	102.164	0.0564873	0.175968	0.623666	0.92472	102.164	-0.0151184	0.162222	0.878412	0.976827	102.164	-0.0534205	0.155547	0.519423	0.888042
chr1	163321158	163321707	42.8016	0.112043	0.235564	0.348023	0.79826	42.8016	0.108169	0.220928	0.284337	0.744789	42.8016	0.0114602	0.190782	0.899113	0.983237
chr1	163321998	163322175	15.6286	-0.115958	0.327798	0.350493	0.800052	15.6286	0.099006	0.28992	0.329812	0.776995	15.6286	0.378854	0.542317	0.0594502	0.350217
chr1	163322272	163322867	53.0737	0.0678938	0.208603	0.556272	0.903874	53.0737	0.0300042	0.186901	0.752787	0.948601	53.0737	-0.0242819	0.179841	0.782358	0.961754
chr1	16352077	16352419	32.2471	0.160879	0.280409	0.209659	0.677	32.2471	0.0339818	0.21115	0.712076	0.939038	32.2471	-0.0961604	0.250495	0.372691	0.808533
chr1	16352594	16353068	45.0655	0.0210792	0.2138	0.851638	0.980307	45.0655	0.14563	0.235348	0.173616	0.638046	45.0655	0.128761	0.24835	0.242916	0.701518
chr1	16367244	16368315	106.669	0.430752	0.271709	0.00600507	0.0904061	106.669	0.207165	0.19738	0.0650824	0.419288	106.669	-0.0791695	0.161849	0.357124	0.798828
chr1	16440811	16441135	25.8403	0.0129524	0.244401	0.907142	0.989909	25.8403	0.0488038	0.227229	0.598026	0.903328	25.8403	0.0419052	0.239064	0.682779	0.941054
chr1	16498874	16499019	7.01501	0.0331525	0.351911	0.769572	0.963084	7.01501	0.142305	0.421863	0.22433	0.68997	7.01501	0.127816	0.419157	0.355518	0.798491
chr1	16499044	16499254	10.7029	-0.240395	0.462329	0.121966	0.545408	10.7029	-0.381129	0.62108	0.0400768	0.326832	10.7029	-0.0638455	0.344596	0.605566	0.920842
chr1	16499469	16499685	16.2949	-0.0388125	0.2757	0.730273	0.9529	16.2949	-0.224084	0.425818	0.0997413	0.509437	16.2949	-0.1926	0.40429	0.192968	0.641359
chr1	16513645	16513876	8.28749	-0.242761	0.512695	0.116565	0.534486	8.28749	-0.0144458	0.292976	0.875553	0.976009	8.28749	0.235158	0.521259	0.154367	0.582
chr1	165630912	165631151	19.8169	0.00271814	0.262657	0.980447	0.998806	19.8169	0.11574	0.289773	0.26797	0.730809	19.8169	0.138103	0.329416	0.281062	0.739317
chr1	165697907	165698587	59.4382	-0.0585709	0.203357	0.610566	0.922229	59.4382	-0.00740955	0.181738	0.938187	0.985711	59.4382	0.0383114	0.180538	0.664859	0.937077
chr1	165698794	165699069	20.0478	0.0919222	0.289315	0.438756	0.852357	20.0478	0.0878176	0.270493	0.37375	0.805762	20.0478	0.0116596	0.251116	0.911407	0.985148
chr1	165768665	165768810	11.8812	0.0320233	0.30272	0.776847	0.964142	11.8812	0.0755431	0.300474	0.443277	0.839827	11.8812	0.0570145	0.313965	0.63069	0.926581
chr1	165769004	165769889	87.3256	0.0247236	0.181279	0.829208	0.975626	87.3256	0.0272544	0.167567	0.78181	0.953194	87.3256	0.0048117	0.151412	0.952414	0.992975
chr1	165827630	165829039	127.824	0.0702855	0.174365	0.542423	0.897621	127.824	0.159321	0.177921	0.134492	0.57746	127.824	0.0752293	0.159954	0.377473	0.811309
chr1	165829191	165829404	18.223	0.0559215	0.273787	0.623571	0.92472	18.223	-0.139988	0.330729	0.210027	0.677527	18.223	-0.314348	0.486322	0.0828107	0.42239
chr1	1660039	1660209	4.35123	0.0117526	0.367365	0.91558	NA	4.35123	-0.131453	0.459538	0.242707	NA	4.35123	-0.188085	0.528827	0.206053	NA
chr1	16613134	16613545	105.628	0.329958	0.240586	0.0196723	0.197223	105.628	0.36115	0.261399	0.00845615	0.12721	105.628	0.0227722	0.1427	0.772034	0.958991
chr1	16643891	16645287	246.204	-0.0515177	0.140321	0.63515	0.927678	246.204	0.0373826	0.132006	0.701162	0.937115	246.204	0.0638057	0.123797	0.39113	0.818324
chr1	166838918	166839327	31.9637	0.126505	0.271122	0.302442	0.762028	31.9637	0.0908941	0.238718	0.355215	0.794286	31.9637	-0.0108333	0.216171	0.910688	0.984932
chr1	166839847	166840230	16.8609	0.0371761	0.275795	0.740986	0.955599	16.8609	0.00971396	0.243647	0.913717	0.982252	16.8609	-0.0243374	0.269644	0.82331	0.971773
chr1	166875738	166876257	43.8624	0.166633	0.261862	0.191789	0.655313	43.8624	0.141527	0.241771	0.184362	0.649038	43.8624	0.00138211	0.190956	0.9878	0.998277
chr1	167220022	167220555	39.3202	0.0850456	0.23777	0.465038	0.865945	39.3202	0.875843	0.563966	0.0016929	0.0436165	39.3202	0.525216	0.462806	0.0157183	0.154046
chr1	167220955	167221344	35.5428	0.0769709	0.239557	0.505365	0.882536	35.5428	-0.0187573	0.207671	0.837511	0.966967	35.5428	-0.0936859	0.249518	0.383354	0.814096
chr1	167221556	167222259	61.2509	0.131029	0.21546	0.27772	0.742948	61.2509	0.00335512	0.181354	0.972001	0.993583	61.2509	-0.104898	0.210877	0.292251	0.74975
chr1	167455062	167455264	12.6193	0.0698768	0.313632	0.549993	0.901108	12.6193	-0.0206844	0.270123	0.820491	0.962241	12.6193	-0.105755	0.349743	0.409353	0.829061
chr1	167627675	167628014	12.6545	0.231181	0.550618	0.107367	0.513021	12.6545	2.31402	1.16553	2.78585e-05	0.00193953	12.6545	1.76409	0.888853	0.000301607	0.00866735
chr1	167628311	167628662	10.7288	0.024918	0.417712	0.808002	0.971027	10.7288	0.435358	0.817059	0.0170388	0.197815	10.7288	0.426941	0.764002	0.0297486	0.232051
chr1	167714235	167715426	115.907	-0.105437	0.174819	0.365573	0.810652	115.907	0.0206155	0.156457	0.835579	0.966437	115.907	0.0995894	0.169828	0.265709	0.726423
chr1	167721212	167721880	56.9128	0.243119	0.267665	0.0779318	0.43863	56.9128	0.0867126	0.195961	0.381695	0.810018	56.9128	-0.0864116	0.202116	0.368543	0.806148
chr1	167721956	167722611	51.6159	0.121648	0.226468	0.311513	0.771484	51.6159	0.127638	0.217598	0.219316	0.686042	51.6159	0.0185311	0.180811	0.833281	0.974468
chr1	167819421	167820280	56.1821	-0.359602	0.333236	0.0267761	0.238766	56.1821	-0.0287298	0.182811	0.764595	0.951977	56.1821	0.28901	0.333195	0.0542224	0.330905
chr1	1678195	1678365	4.22855	-0.130783	0.44407	0.29407	NA	4.22855	-0.206805	0.547896	0.116641	NA	4.22855	-0.0691722	0.43783	0.584203	NA
chr1	167820426	167820808	34.5278	-0.113498	0.257235	0.345288	0.797104	34.5278	0.095605	0.228064	0.334457	0.78098	34.5278	0.324356	0.409225	0.0577723	0.344144
chr1	167821010	167821164	8.57358	-0.0858387	0.35842	0.474442	0.869173	8.57358	0.0630178	0.310071	0.517565	0.874885	8.57358	0.214947	0.480749	0.177898	0.620499
chr1	167935250	167935984	55.4886	0.203694	0.251283	0.120926	0.544033	55.4886	-0.0276212	0.187433	0.771356	0.952693	55.4886	-0.262698	0.316335	0.0652504	0.36975
chr1	167936231	167937542	171.969	0.165124	0.162228	0.154843	0.602735	171.969	0.228862	0.168513	0.0368038	0.311804	171.969	0.0498331	0.130271	0.511499	0.885035
chr1	168178371	168178683	22.9907	0.035842	0.250902	0.748904	0.957389	22.9907	0.02785	0.225057	0.758752	0.950146	22.9907	-0.00150169	0.23462	0.988131	0.998277
chr1	168178979	168180255	118.147	0.152969	0.177915	0.197864	0.6634	118.147	-0.054555	0.158581	0.58529	0.900092	118.147	-0.206653	0.218213	0.06669	0.374852
chr1	168225601	168225978	28.4224	0.0664322	0.247458	0.561773	0.90679	28.4224	0.0300996	0.2166	0.741687	0.946251	28.4224	-0.0249678	0.224018	0.800146	0.967132
chr1	168226058	168226321	25.0076	0.0255784	0.242594	0.818559	0.973021	25.0076	-0.0312207	0.22174	0.731775	0.9437	25.0076	-0.0601209	0.247896	0.567677	0.907411
chr1	168301418	168301686	10.834	-0.0723391	0.343396	0.539497	0.896277	10.834	0.355416	0.588252	0.0454796	0.349334	10.834	0.78138	0.807378	0.0111247	0.121894
chr1	1686457	1687962	103.003	-0.335185	0.244734	0.0188811	0.192369	103.003	-0.0969831	0.167174	0.340265	0.78358	103.003	0.142408	0.201156	0.158826	0.589362
chr1	16889070	16889473	37.6035	-0.0448834	0.224434	0.691657	0.942125	37.6035	0.039172	0.20177	0.675411	0.929868	37.6035	0.0835436	0.231323	0.415684	0.832649
chr1	16895768	16895952	16.9317	0.0263234	0.269684	0.813659	0.971988	16.9317	0.0237803	0.242091	0.792123	0.955057	16.9317	0.00281059	0.260849	0.979027	0.997089
chr1	16896244	16896854	21.7833	-0.119871	0.295188	0.329894	0.786397	21.7833	-0.0937256	0.264528	0.345863	0.787628	21.7833	0.00402834	0.248553	0.969154	0.996048
chr1	16903756	16904793	127.237	0.215324	0.18663	0.0803826	0.445683	127.237	-0.0474035	0.156417	0.634926	0.916431	127.237	-0.28922	0.244335	0.0261488	0.214473
chr1	16904905	16905214	62.9165	0.000984128	0.197625	0.993093	0.999149	62.9165	0.112855	0.197614	0.269184	0.731716	62.9165	0.109673	0.212975	0.275167	0.735383
chr1	16905445	16905615	13.2009	-0.140323	0.354268	0.279459	0.744232	13.2009	-0.0657532	0.278845	0.492891	0.86408	13.2009	0.0471987	0.30293	0.684579	0.941236
chr1	169106722	169106922	14.942	0.0708505	0.292544	0.542016	0.897405	14.942	-0.00389692	0.248052	0.965332	0.991961	14.942	-0.0769059	0.301634	0.512738	0.885354
chr1	169109394	169109809	16.2804	0.0355321	0.273295	0.751675	0.958507	16.2804	0.0118662	0.241962	0.894737	0.978471	16.2804	-0.0200408	0.265758	0.852924	0.977526
chr1	16914183	16914674	61.034	-0.00325207	0.198229	0.977171	0.998133	61.034	0.0258705	0.181804	0.787573	0.954271	61.034	0.0257452	0.174588	0.76637	0.957592
chr1	16914767	16914937	5.30989	-0.0338591	0.363351	0.763701	NA	5.30989	-0.0393376	0.339824	0.681459	0.93191	5.30989	-0.0132751	0.381129	0.914348	0.985924
chr1	1692367	1693039	53.986	0.0639027	0.210967	0.578543	0.912087	53.986	0.10824	0.207492	0.28518	0.745327	53.986	0.046173	0.188913	0.61083	0.922053
chr1	169367996	169368206	14.2761	-0.0177029	0.280771	0.873984	0.984509	14.2761	-0.0288224	0.255976	0.751303	0.948601	14.2761	-0.0174672	0.2821	0.875456	0.980134
chr1	169368272	169368639	18.9262	-0.0605205	0.274144	0.596791	0.918772	18.9262	-0.075099	0.262875	0.436164	0.836635	18.9262	-0.0264644	0.263402	0.805884	0.968262
chr1	16938864	16939090	6.44188	-0.152077	0.439344	0.249187	NA	6.44188	-0.148366	0.441076	0.211546	0.679026	6.44188	-0.0110422	0.379896	0.928665	0.98878
chr1	16939279	16939479	5.62593	-0.159951	0.526489	0.152792	NA	5.62593	-0.154734	0.536404	0.14939	0.602758	5.62593	-0.000305109	0.471648	0.997795	0.999419
chr1	16960887	16961120	12.1409	-0.000604502	0.286481	0.995674	0.999149	12.1409	-0.096112	0.31553	0.349423	0.790724	12.1409	-0.12207	0.36078	0.353804	0.797223
chr1	169794667	169794953	22.8258	0.0653173	0.26586	0.56891	0.909934	22.8258	0.133199	0.293168	0.216706	0.683597	22.8258	0.0726329	0.264511	0.5072	0.883643
chr1	169893004	169894246	107.01	0.186367	0.199064	0.131739	0.563688	107.01	0.137241	0.179549	0.190039	0.656178	107.01	-0.0162446	0.146145	0.837871	0.974929
chr1	169931154	169931525	10.5129	0.010885	0.359739	0.922195	0.991374	10.5129	1.68225	1.07403	0.000468894	0.0175589	10.5129	1.55244	0.992574	0.000677235	0.0162978
chr1	169931638	169931783	5.51367	0.137657	0.467472	0.261066	NA	5.51367	0.435481	0.787079	0.0230345	0.240869	5.51367	0.197767	0.508891	0.200632	0.650349
chr1	169932166	169932575	13.7168	0.0680368	0.318399	0.560323	0.906158	13.7168	0.838795	0.829773	0.00625632	0.10497	13.7168	0.53328	0.643004	0.029022	0.228199
chr1	169933655	169934311	21.9548	0.17245	0.393487	0.210765	0.678636	21.9548	2.71812	0.625089	3.80327e-07	6.24871e-05	21.9548	1.96122	0.61777	3.02448e-05	0.00134435
chr1	169934868	169936011	31.953	0.133439	0.307804	0.289143	0.750625	31.953	2.36725	0.501546	2.10303e-07	3.68687e-05	31.953	1.77567	0.508834	1.9317e-05	0.000944215
chr1	169936209	169936677	11.8788	0.307751	0.585652	0.0693364	0.413167	11.8788	1.92328	1.09425	0.000195449	0.0091817	11.8788	0.611411	0.728633	0.0216656	0.190317
chr1	169941728	169941927	6.85593	-0.0037212	0.377424	0.972914	0.997482	6.85593	0.428073	0.746737	0.028753	0.272947	6.85593	0.514853	0.771771	0.027679	0.221693
chr1	169943082	169943423	9.81794	-0.00167529	0.337788	0.98809	0.999149	9.81794	0.724186	0.86674	0.00959552	0.139665	9.81794	0.808904	0.843957	0.00983744	0.112202
chr1	169943820	169944016	7.6254	0.100804	0.423348	0.395212	0.830725	7.6254	1.11874	1.11989	0.00192959	0.047792	7.6254	0.734692	0.854337	0.0120894	0.128955
chr1	169944364	169944524	5.54757	0.0322907	0.394119	0.766788	NA	5.54757	0.388452	0.732019	0.0327179	0.29298	5.54757	0.365889	0.670791	0.0605331	0.35407
chr1	169944953	169945100	4.87774	0.0134236	0.42432	0.892508	NA	4.87774	0.536881	0.896561	0.010234	0.14537	4.87774	0.57235	0.863617	0.0134775	0.138759
chr1	169945526	169946075	13.8526	-0.0178773	0.319138	0.87388	0.984509	13.8526	1.22316	0.936703	0.00197196	0.0484588	13.8526	1.36599	0.875505	0.00137386	0.0277554
chr1	169949376	169949743	10.8331	-0.0869237	0.377843	0.467854	0.866288	10.8331	1.11493	0.96312	0.00279165	0.0611765	10.8331	1.62775	0.97373	0.000522951	0.0132345
chr1	169955842	169956015	4.71192	0.00260262	0.40619	0.980099	NA	4.71192	0.292368	0.654974	0.0552701	NA	4.71192	0.345006	0.680492	0.0595726	NA
chr1	169956686	169957015	8.22185	0.287714	0.607826	0.0638791	0.397148	8.22185	1.03252	1.13811	0.00184571	0.0463361	8.22185	0.301113	0.567396	0.100083	0.468567
chr1	169958344	169958638	7.5485	0.0539732	0.376305	0.636106	0.927719	7.5485	0.666189	0.894964	0.010696	0.149311	7.5485	0.509427	0.732067	0.0320466	0.241977
chr1	169959026	169959258	8.5922	0.00908852	0.342016	0.935456	0.992555	8.5922	0.518734	0.759217	0.0210149	0.226544	8.5922	0.558756	0.738506	0.0265789	0.216341
chr1	169959839	169960058	7.91588	0.126573	0.441463	0.306063	0.76573	7.91588	1.16554	1.12758	0.00170604	0.0438471	7.91588	0.668045	0.811974	0.016264	0.157234
chr1	169960701	169960886	5.67548	0.110023	0.458236	0.33342	NA	5.67548	0.650318	0.970442	0.00643453	0.106668	5.67548	0.444742	0.726162	0.0393202	0.273595
chr1	169961337	169961559	6.02386	-0.0421685	0.398175	0.70009	NA	6.02386	0.466861	0.780133	0.0234692	0.243708	6.02386	0.669204	0.885151	0.0118148	0.127021
chr1	169962193	169962537	8.30415	0.223082	0.534448	0.120948	0.544033	8.30415	0.931324	1.07036	0.00328911	0.0683278	8.30415	0.297673	0.569481	0.102001	0.472967
chr1	169964643	169965000	12.5808	0.0512012	0.335947	0.656718	0.934	12.5808	1.62453	0.960734	0.000572309	0.0201567	12.5808	1.24049	0.864935	0.00215218	0.038461
chr1	169966185	169966359	6.81509	0.183759	0.502831	0.169199	0.623816	6.81509	0.698668	0.966588	0.00722242	0.115873	6.81509	0.259614	0.54823	0.12978	0.535006
chr1	169967846	169968068	6.14994	0.0402387	0.387269	0.71678	NA	6.14994	0.486831	0.800716	0.0208528	0.225649	6.14994	0.424258	0.699918	0.0459437	0.300863
chr1	169996286	169996536	6.65252	0.0345892	0.375389	0.756784	0.959566	6.65252	0.449667	0.756815	0.0264405	0.261414	6.65252	0.404359	0.675522	0.052733	0.326007
chr1	169996747	169997801	26.9835	0.072515	0.345311	0.538629	0.895932	26.9835	1.27259	1.00313	0.00173768	0.0445503	26.9835	0.78768	0.814644	0.0108434	0.119732
chr1	169998550	169998766	6.24988	0.0320692	0.37607	0.773359	NA	6.24988	0.402309	0.718625	0.0336401	0.29782	6.24988	0.372545	0.65333	0.0627576	0.361225
chr1	169998889	169999276	16.2792	0.0143726	0.310569	0.898218	0.988799	16.2792	2.13779	0.747819	4.79869e-05	0.00302993	16.2792	1.95091	0.738093	8.38878e-05	0.00308253
chr1	169999806	170000245	13.034	-0.0590053	0.359627	0.610341	0.922229	13.034	1.93898	0.915865	0.000184475	0.00875438	13.034	2.11145	0.893774	6.71249e-05	0.00258552
chr1	170002286	170002459	6.52378	0.0066853	0.35842	0.95216	0.99408	6.52378	0.273973	0.576543	0.0760237	0.453148	6.52378	0.319325	0.599937	0.0880217	0.437877
chr1	17048014	17048226	6.09849	-0.0628165	0.363651	0.588742	NA	6.09849	-0.0576855	0.338353	0.556258	0.890791	6.09849	-0.00536938	0.365901	0.965096	0.995814
chr1	170531701	170532589	63.4852	0.0777313	0.201369	0.503593	0.881754	63.4852	0.0734723	0.185948	0.456396	0.846713	63.4852	0.00606186	0.16701	0.942825	0.99158
chr1	170532672	170532991	18.9838	-0.000618351	0.264448	0.995552	0.999149	18.9838	-0.0185216	0.239325	0.836797	0.966833	18.9838	-0.0214442	0.262567	0.841787	0.975333
chr1	17053776	17054011	20.3576	-0.0316355	0.257463	0.777116	0.964263	20.3576	-0.00622718	0.227255	0.944613	0.986751	20.3576	0.0223888	0.248591	0.830089	0.973898
chr1	17054448	17054630	12.6102	-0.0867573	0.320908	0.467474	0.866288	12.6102	0.0129503	0.256456	0.885786	0.977257	12.6102	0.112059	0.349362	0.384255	0.814641
chr1	171485540	171486139	67.2774	0.0619764	0.199143	0.591068	0.917154	67.2774	0.0346387	0.180639	0.719912	0.940194	67.2774	-0.0154132	0.168826	0.856198	0.97774
chr1	171741663	171743984	226.605	-0.0778215	0.140948	0.474882	0.869305	226.605	-0.0421053	0.132336	0.665902	0.926496	226.605	0.0199541	0.113153	0.774769	0.959898
chr1	171780753	171781281	43.7602	-0.0604871	0.217313	0.597452	0.919023	43.7602	-0.0480321	0.196865	0.61298	0.910168	43.7602	0.00232847	0.190181	0.979405	0.997089
chr1	171781733	171781968	12.8874	0.00359522	0.285147	0.974269	0.997655	12.8874	-0.0196184	0.258998	0.828448	0.964882	12.8874	-0.0281647	0.291413	0.803931	0.967773
chr1	1724103	1724381	19.8294	0.06096	0.270265	0.593902	0.918248	19.8294	0.0233944	0.23483	0.795296	0.955614	19.8294	-0.029155	0.25398	0.782603	0.961754
chr1	172532097	172532279	11.043	0.515409	0.671558	0.0239636	0.223668	11.043	0.0336134	0.292559	0.718584	0.939735	11.043	-0.413416	0.607261	0.0529741	0.326935
chr1	172532559	172532768	19.6016	0.0160569	0.255616	0.885051	0.986784	19.6016	-0.100425	0.278228	0.320958	0.772406	19.6016	-0.148389	0.338705	0.25741	0.716305
chr1	172533130	172533729	67.4965	0.369755	0.314563	0.0210044	0.205744	67.4965	0.0618327	0.185666	0.526639	0.878169	67.4965	-0.211632	0.271116	0.0914084	0.446607
chr1	173476696	173477038	32.5244	0.000833697	0.230099	0.994026	0.999149	32.5244	-0.0397363	0.213355	0.667097	0.926956	32.5244	-0.0432659	0.224587	0.662647	0.936758
chr1	173477382	173478057	66.5096	0.0369931	0.195442	0.746512	0.957076	66.5096	-0.0252425	0.179424	0.793481	0.955428	66.5096	-0.0518584	0.179224	0.558527	0.903834
chr1	173478135	173478307	7.54737	-0.012753	0.331502	0.909741	0.990103	7.54737	-0.124673	0.401757	0.267738	0.730594	7.54737	-0.140531	0.43524	0.320233	0.773951
chr1	173715068	173715238	18.63	0.208974	0.372753	0.146209	0.587545	18.63	0.058202	0.253912	0.534939	0.881571	18.63	-0.0998697	0.297232	0.39822	0.822058
chr1	173823989	173824390	36.5917	0.0629637	0.23669	0.581451	0.912923	36.5917	0.305898	0.382329	0.0381451	0.318117	36.5917	0.207118	0.32659	0.128748	0.533153
chr1	173824626	173825277	64.9322	0.141559	0.21521	0.244656	0.714181	64.9322	0.148498	0.208661	0.163637	0.623826	64.9322	0.0188241	0.166387	0.823724	0.971778
chr1	173865419	173865623	9.96	-0.0374574	0.31115	0.741575	0.95586	9.96	-0.0650036	0.304323	0.504098	0.869038	9.96	-0.0401171	0.32465	0.737035	0.951604
chr1	173865816	173866134	17.6362	-0.0914698	0.292876	0.441404	0.853691	17.6362	-0.071484	0.262344	0.456005	0.846212	17.6362	0.00323263	0.263052	0.975986	0.996681
chr1	173866260	173867925	132.186	-0.150523	0.174138	0.202413	0.669669	132.186	-0.0859595	0.156581	0.395251	0.817409	132.186	0.0336193	0.139068	0.666004	0.937593
chr1	173868217	173868665	41.4456	0.0368587	0.221351	0.743969	0.956704	41.4456	0.14624	0.246268	0.173974	0.638096	41.4456	0.110766	0.244553	0.303832	0.760392
chr1	174021714	174022334	54.3308	0.12813	0.222244	0.288517	0.750035	54.3308	-0.0637555	0.193723	0.510345	0.871476	54.3308	-0.231482	0.30196	0.0859365	0.432314
chr1	174022551	174023112	60.6522	0.108802	0.210154	0.358774	0.805314	60.6522	0.0100473	0.181582	0.916311	0.982664	60.6522	-0.0763761	0.194597	0.414749	0.832175
chr1	174159549	174159887	28.8968	0.213697	0.329323	0.128914	0.557936	28.8968	0.0940403	0.244159	0.341589	0.784404	28.8968	-0.059031	0.234825	0.563314	0.906125
chr1	17437246	17437642	24.1374	-0.111576	0.279823	0.356462	0.804277	24.1374	-0.0304919	0.22253	0.737536	0.945034	24.1374	0.0635981	0.25684	0.553655	0.901754
chr1	17438056	17439704	139.903	-0.0367045	0.163456	0.746891	0.957076	139.903	-0.0368835	0.152752	0.71132	0.939038	139.903	-0.00343295	0.133344	0.963907	0.995725
chr1	1745926	1746562	42.2473	-0.171999	0.265484	0.181284	0.641593	42.2473	0.0320596	0.195145	0.732997	0.94389	42.2473	0.238064	0.332329	0.0937264	0.451971
chr1	174998681	174999639	123.885	0.265426	0.202641	0.0396931	0.303011	123.885	0.206272	0.184276	0.0624317	0.411365	123.885	-0.0156883	0.134989	0.837331	0.974929
chr1	175000084	175000879	79.9483	0.158586	0.206512	0.195415	0.660663	79.9483	0.186397	0.209668	0.093876	0.497538	79.9483	0.0309167	0.158463	0.708899	0.945127
chr1	175023130	175023300	13.4248	0.116212	0.331558	0.350311	0.800052	13.4248	0.0321822	0.262417	0.72496	0.942061	13.4248	-0.0691058	0.304644	0.556755	0.902817
chr1	175023764	175023927	11.5319	0.0735441	0.321448	0.531792	0.894182	11.5319	0.130853	0.354995	0.241066	0.705361	11.5319	0.0652529	0.315502	0.584478	0.914215
chr1	17540030	17540224	11.396	-0.0240114	0.296166	0.830766	0.975963	11.396	-0.0429521	0.276826	0.644713	0.920142	11.396	-0.0284044	0.304329	0.806234	0.968334
chr1	1758740	1758982	13.1845	-0.0746832	0.306999	0.524119	0.890851	13.1845	-0.0153076	0.253838	0.865142	0.97352	13.1845	0.0547494	0.302541	0.638246	0.929225
chr1	176206658	176207505	104.923	0.300756	0.227369	0.0275841	0.242811	104.923	0.0762752	0.165767	0.448193	0.842099	104.923	-0.146309	0.19681	0.145315	0.565421
chr1	176207755	176207935	13.3246	0.0213471	0.286002	0.848727	0.979955	13.3246	-0.0527957	0.275764	0.574822	0.896916	13.3246	-0.092822	0.330412	0.453652	0.854631
chr1	1777610	1778397	76.6605	0.233273	0.234138	0.0778343	0.438303	76.6605	0.0591415	0.177058	0.548462	0.887902	76.6605	-0.115222	0.201252	0.241278	0.699343
chr1	1778527	1779570	93.2976	-0.0163788	0.180202	0.88627	0.987171	93.2976	0.272462	0.231867	0.0269154	0.264113	93.2976	0.35807	0.295897	0.0190116	0.173987
chr1	178094446	178094625	6.51619	0.0160071	0.375809	0.884492	0.986725	6.51619	0.531357	0.822322	0.0177803	0.202901	6.51619	0.542506	0.777537	0.0254542	0.210537
chr1	1782889	1783093	7.25633	-0.150022	0.419747	0.257955	0.724549	7.25633	-0.15122	0.425937	0.205438	0.672245	7.25633	-0.0157553	0.35919	0.897621	0.983025
chr1	178725492	178725714	5.38226	-0.11177	0.4103	0.364287	NA	5.38226	-0.25415	0.588139	0.0825486	0.470059	5.38226	-0.117321	0.455726	0.386404	0.815559
chr1	179026269	179026859	44.3694	0.0917339	0.227323	0.433374	0.850571	44.3694	0.155428	0.244278	0.153715	0.61006	44.3694	0.0608492	0.20535	0.523111	0.888886
chr1	179082110	179082644	52.0214	0.110716	0.221929	0.351994	0.801109	52.0214	0.120826	0.213264	0.24045	0.705027	52.0214	0.0209092	0.180434	0.812149	0.97007
chr1	179088138	179088332	3.34416	-0.171637	0.507393	0.175589	NA	3.34416	-0.302735	0.711161	0.0301047	NA	3.34416	-0.124681	0.529198	0.299919	NA
chr1	179129915	179130107	7.78689	-0.0311632	0.330084	0.783483	0.965815	7.78689	-0.0301461	0.30084	0.747149	0.947664	7.78689	-0.00548429	0.339354	0.963678	0.995725
chr1	179131904	179132074	4.89782	0.0125144	0.367799	0.910121	NA	4.89782	-0.00862952	0.339243	0.926663	0.984283	4.89782	-0.0253761	0.391395	0.837841	0.974929
chr1	179137678	179137848	3.7603	-0.0285998	0.395111	0.791711	NA	3.7603	-0.109634	0.451417	0.29918	NA	3.7603	-0.100113	0.472631	0.435565	NA
chr1	179141867	179142650	26.509	-0.479321	0.503423	0.0213091	0.207447	26.509	-0.337986	0.441351	0.0352737	0.305246	26.509	0.0227252	0.236796	0.823038	0.971771
chr1	179143302	179144463	53.6545	-0.35776	0.331263	0.0270155	0.239889	53.6545	-0.503296	0.419223	0.00666907	0.109229	53.6545	-0.0448457	0.192242	0.623988	0.925138
chr1	179229332	179229640	22.247	-0.026369	0.251113	0.812979	0.971928	22.247	-0.0659354	0.243519	0.485863	0.862128	22.247	-0.0486386	0.254571	0.647241	0.932389
chr1	179293383	179293528	11.8922	0.024456	0.294295	0.827626	0.975487	11.8922	-0.0738868	0.301637	0.452566	0.844479	11.8922	-0.129511	0.372633	0.334709	0.784371
chr1	179293861	179294523	53.9163	0.0608505	0.206466	0.59676	0.918772	53.9163	-0.0454192	0.189172	0.635618	0.916832	53.9163	-0.100993	0.217668	0.316469	0.7706
chr1	179294700	179294994	17.2028	-0.0313608	0.271535	0.779452	0.964555	17.2028	-0.0134805	0.240222	0.880557	0.977108	17.2028	0.01415	0.265285	0.895696	0.982937
chr1	179295166	179295396	8.40726	-0.055052	0.332919	0.633939	0.927587	8.40726	-0.0215761	0.288508	0.815129	0.960591	8.40726	0.0295151	0.334603	0.806364	0.968334
chr1	179365362	179365967	50.9193	-0.00413302	0.205028	0.970854	0.997292	50.9193	0.00970847	0.186733	0.91825	0.983017	50.9193	0.0122172	0.180911	0.889561	0.982293
chr1	179881256	179882618	139.578	0.0436909	0.161245	0.700272	0.944983	139.578	0.0209478	0.15032	0.833152	0.966161	139.578	-0.0132488	0.131095	0.860326	0.978189
chr1	179882779	179883570	78.5429	0.175342	0.212606	0.158838	0.60929	78.5429	0.190217	0.21293	0.0892938	0.486729	78.5429	0.0232653	0.157506	0.777652	0.960984
chr1	179953823	179954517	48.2199	0.0282925	0.208775	0.802802	0.969891	48.2199	-0.0297475	0.191488	0.752777	0.948601	48.2199	-0.0525149	0.197626	0.572606	0.909055
chr1	179954860	179955332	48.7161	0.154943	0.251006	0.216441	0.685174	48.7161	0.137487	0.234402	0.193442	0.659084	48.7161	0.00521803	0.18778	0.953569	0.99318
chr1	180154191	180154424	13.3099	0.0303632	0.298503	0.787715	0.966455	13.3099	0.0791599	0.299432	0.423965	0.832792	13.3099	0.0627272	0.312764	0.597187	0.918868
chr1	180154510	180154752	24.7825	-0.132007	0.29966	0.291534	0.751974	24.7825	0.0457913	0.229045	0.619365	0.912487	24.7825	0.238316	0.396755	0.122094	0.518403
chr1	180501983	180503483	173.24	0.151374	0.161105	0.189909	0.653558	173.24	0.102223	0.148827	0.312172	0.76586	173.24	-0.0225806	0.124922	0.759	0.956472
chr1	180632202	180632581	25.5809	0.201369	0.341309	0.149733	0.593531	25.5809	0.0966	0.260078	0.33274	0.779544	25.5809	-0.0500938	0.244276	0.630024	0.926581
chr1	181022269	181022883	41.6133	-0.030727	0.216554	0.785411	0.966007	41.6133	-0.0355257	0.197927	0.704854	0.937319	41.6133	-0.00952849	0.194787	0.916934	0.986448
chr1	181033333	181033817	31.1023	0.208233	0.313002	0.132059	0.563922	31.1023	0.0193034	0.210976	0.832246	0.96611	31.1023	-0.164182	0.304556	0.193267	0.641925
chr1	181088864	181089264	21.1336	0.0029981	0.250204	0.97842	0.998345	21.1336	-0.0638424	0.244766	0.498581	0.866152	21.1336	-0.0785453	0.27449	0.483184	0.871641
chr1	182839351	182840726	98.4426	0.0263461	0.176184	0.818127	0.972908	98.4426	-0.0143904	0.16329	0.884082	0.977257	98.4426	-0.0303209	0.150101	0.707096	0.944832
chr1	183022110	183023798	152.827	0.0683136	0.159932	0.5476	0.900165	152.827	0.131267	0.156244	0.202556	0.669449	152.827	0.0519548	0.136641	0.504479	0.881855
chr1	183470892	183471736	59.1486	-0.0946855	0.209952	0.419879	0.84478	59.1486	-0.230473	0.26835	0.059482	0.402793	59.1486	-0.110419	0.223467	0.283484	0.741757
chr1	183471804	183472790	86.3306	0.12132	0.192113	0.30694	0.767033	86.3306	0.0373274	0.169431	0.704613	0.937164	86.3306	-0.0550164	0.16382	0.517742	0.887523
chr1	183635281	183635679	21.5874	0.0226442	0.253428	0.838772	0.97809	21.5874	-0.0013414	0.226461	0.988057	0.997317	21.5874	-0.0226575	0.245224	0.82683	0.973213
chr1	184001780	184002300	22.7237	-0.772862	0.661858	0.0066429	0.0966298	22.7237	-0.191287	0.343877	0.118499	0.550149	22.7237	0.164398	0.354484	0.226276	0.682242
chr1	184002485	184003238	30.7497	-2.0194	0.504935	2.94561e-06	0.00020606	30.7497	-0.466982	0.496531	0.0149407	0.181867	30.7497	0.662732	0.607038	0.0134281	0.138342
chr1	184003458	184003683	6.38542	-0.608477	0.842351	0.00863206	NA	6.38542	-0.32882	0.641491	0.0525496	0.378485	6.38542	0.126898	0.476318	0.350115	0.794497
chr1	184036798	184037322	21.5161	0.0318149	0.250816	0.775854	0.963756	21.5161	-0.385628	0.52786	0.0320049	0.290022	21.5161	-0.643777	0.628026	0.0158456	0.154714
chr1	184037484	184037705	8.22911	-0.0868141	0.351929	0.470034	0.86695	8.22911	-0.361245	0.649957	0.044762	0.347497	8.22911	-0.208061	0.495032	0.188016	0.633956
chr1	184051027	184052114	98.2125	0.313014	0.239048	0.0252082	0.229956	98.2125	0.0193934	0.164917	0.844043	0.968538	98.2125	-0.268142	0.260161	0.0404845	0.278912
chr1	184052216	184052502	17.8721	0.0232322	0.261734	0.834782	0.976899	17.8721	-0.219462	0.407306	0.10052	0.511584	17.8721	-0.354827	0.512645	0.0655128	0.370719
chr1	184056509	184057363	66.5852	0.106561	0.200915	0.36721	0.812149	66.5852	-0.282457	0.284615	0.0317571	0.288861	66.5852	-0.726541	0.40111	0.00242444	0.0418475
chr1	184754374	184754818	42.1636	0.188703	0.27172	0.151181	0.596023	42.1636	0.0616478	0.205094	0.518284	0.875144	42.1636	-0.0795879	0.219683	0.424722	0.838326
chr1	184755203	184755626	20.7345	-0.0673316	0.268217	0.557998	0.904538	20.7345	-0.286142	0.450955	0.0587242	0.399847	20.7345	-0.18589	0.374318	0.191287	0.639069
chr1	184791821	184791991	2.19655	-0.0762604	0.456	0.45049	NA	2.19655	-0.0084521	0.394709	0.92537	NA	2.19655	0.0780196	0.489612	0.505016	NA
chr1	185156361	185156890	55.8057	0.411227	0.353935	0.0172958	0.181069	55.8057	0.0478971	0.190291	0.617375	0.91184	55.8057	-0.275156	0.320142	0.0581235	0.345253
chr1	185157217	185157442	25.1449	0.0644225	0.253724	0.573157	0.911084	25.1449	0.0642529	0.233278	0.495976	0.864872	25.1449	0.0113078	0.227473	0.909332	0.984711
chr1	185257531	185258027	15.8095	-0.476853	0.592764	0.0279248	0.244648	15.8095	-0.135437	0.322571	0.219224	0.685886	15.8095	0.134398	0.357029	0.310588	0.766279
chr1	185316306	185317203	72.9879	-0.0258373	0.190145	0.821335	0.973164	72.9879	0.0968673	0.18336	0.337674	0.782243	72.9879	0.117646	0.206229	0.238025	0.695746
chr1	185317672	185318507	52.6801	-0.135394	0.232861	0.266929	0.732908	52.6801	0.104366	0.203985	0.300829	0.757635	52.6801	0.36617	0.375309	0.0328264	0.245209
chr1	185373796	185374259	8.51988	-0.691292	0.848902	0.00824957	0.112152	8.51988	-0.258357	0.542159	0.0854117	0.477439	8.51988	0.156874	0.471644	0.27887	0.737789
chr1	185561424	185561569	5.17985	0.145201	0.506701	0.197051	NA	5.17985	0.537971	0.920869	0.00694454	0.112519	5.17985	0.353348	0.662589	0.0648549	0.368631
chr1	185644306	185644609	11.6714	-0.0716473	0.333943	0.542653	0.897621	11.6714	0.269505	0.500454	0.0757044	0.45208	11.6714	0.634297	0.733297	0.0197106	0.178511
chr1	185644994	185647719	174.591	-0.585869	0.258688	0.000400455	0.0124361	174.591	0.607886	0.249417	0.000106978	0.00570161	174.591	1.49818	0.212659	3.01339e-13	1.16745e-10
chr1	185647809	185648240	23.4803	-0.33202	0.468521	0.059449	0.38278	23.4803	0.243576	0.382635	0.0735904	0.445303	23.4803	1.51625	0.65422	0.000367057	0.0100075
chr1	185892993	185893690	31.6998	-0.083486	0.245196	0.472807	0.868692	31.6998	-0.0584954	0.217328	0.534379	0.881539	31.6998	0.00976341	0.215343	0.919304	0.98698
chr1	186374664	186375222	41.4619	0.2181	0.2864	0.111302	0.522044	41.4619	0.0059955	0.196932	0.948396	0.987625	41.4619	-0.200472	0.304088	0.125457	0.526174
chr1	186375435	186376005	47.4421	0.0330884	0.212411	0.770106	0.963104	47.4421	0.112607	0.215627	0.268374	0.731274	47.4421	0.0795168	0.212967	0.417802	0.834344
chr1	186376020	186376282	16.031	0.0727172	0.292787	0.532234	0.89426	16.031	0.0719218	0.272138	0.45559	0.84609	16.031	0.0127682	0.266387	0.906026	0.984225
chr1	188026571	188027586	26.8144	-1.0907	0.634289	0.00133863	0.0313004	26.8144	-2.121	0.538653	5.08051e-06	0.000514295	26.8144	-0.228574	0.403823	0.13703	0.54969
chr1	188027981	188028239	8.51511	-0.84999	0.887879	0.00496394	0.0794547	8.51511	-1.04672	1.20721	0.000740591	0.0242088	8.51511	-0.227968	0.603807	0.119438	0.512244
chr1	188028491	188028916	11.4415	-0.253258	0.459324	0.109978	0.518982	11.4415	-1.23707	0.994826	0.00193445	0.0478554	11.4415	-0.297809	0.551431	0.102304	0.473722
chr1	188029003	188029342	7.75499	-0.724274	0.855855	0.00754464	0.105178	7.75499	-0.703741	0.902437	0.00964297	0.139907	7.75499	0.0201602	0.386595	0.870573	0.97956
chr1	188048705	188049200	9.38578	-0.114803	0.367287	0.359629	0.80625	9.38578	-1.13631	1.12476	0.00182378	0.0460065	9.38578	-0.614189	0.841152	0.0165128	0.158613
chr1	1889973	1890413	33.5817	0.33733	0.393289	0.0452054	0.327961	33.5817	0.109517	0.244184	0.280204	0.741594	33.5817	-0.102096	0.251686	0.347121	0.792821
chr1	18902399	18902806	26.7586	0.105454	0.270183	0.378357	0.819145	26.7586	0.0403671	0.224351	0.660044	0.924543	26.7586	-0.045587	0.237644	0.65592	0.935364
chr1	18902995	18903242	15.4224	-0.0131114	0.277913	0.90631	0.989681	15.4224	0.0715156	0.272195	0.457882	0.847571	15.4224	0.10595	0.32359	0.392176	0.819047
chr1	1890449	1890857	36.3842	0.0477744	0.230219	0.672831	0.937737	36.3842	-0.036505	0.209113	0.693045	0.934371	36.3842	-0.0860651	0.242585	0.414093	0.831839
chr1	1891168	1892042	71.53	0.0736987	0.194644	0.525429	0.891454	71.53	0.0111405	0.175143	0.908436	0.980867	71.53	-0.045003	0.170564	0.601865	0.919868
chr1	18927207	18927438	10.3342	-0.623241	0.803428	0.0119742	0.144073	10.3342	0.0380831	0.282092	0.682224	0.932092	10.3342	0.992926	0.960917	0.00439635	0.0641682
chr1	18950090	18950669	31.507	0.00304154	0.227475	0.978237	0.998345	31.507	-0.0693698	0.221608	0.466921	0.85272	31.507	-0.0788094	0.24212	0.452145	0.854562
chr1	189627482	189628678	79.3795	0.0601286	0.187368	0.602622	0.919725	79.3795	0.0145307	0.170705	0.881746	0.977257	79.3795	-0.0310844	0.159822	0.708541	0.945046
chr1	189628918	189629505	45.0552	0.181701	0.258197	0.160035	0.611422	45.0552	0.00780156	0.193047	0.933396	0.985252	45.0552	-0.154818	0.26509	0.18486	0.630399
chr1	189629626	189629965	21.9819	0.200479	0.349036	0.153057	0.599277	21.9819	0.0949144	0.26513	0.340848	0.783923	21.9819	-0.0513902	0.250448	0.62602	0.925565
chr1	189644590	189644756	8.93035	0.0529431	0.338779	0.646382	0.930228	8.93035	0.216376	0.48012	0.115764	0.544648	8.93035	0.162643	0.423228	0.262092	0.721325
chr1	189646338	189646486	9.89467	0.0750893	0.334767	0.525154	0.891296	9.89467	0.025443	0.285653	0.782854	0.953308	9.89467	-0.0434245	0.324596	0.716579	0.947047
chr1	189646944	189648304	67.8432	-0.0432514	0.193107	0.70625	0.947006	67.8432	-0.0424606	0.177844	0.663069	0.92559	67.8432	-0.00470571	0.164594	0.955282	0.993345
chr1	189648475	189648697	16.3063	0.0237315	0.269312	0.831526	0.975985	16.3063	-0.0294902	0.246244	0.745035	0.947213	16.3063	-0.0607802	0.284169	0.591125	0.916589
chr1	189648812	189648969	11.7657	0.0249146	0.300557	0.824771	0.974327	11.7657	0.0318404	0.273349	0.729317	0.943332	11.7657	0.0141193	0.300051	0.902093	0.983757
chr1	189649019	189649418	18.095	0.0340919	0.264429	0.760822	0.960547	18.095	-0.0822817	0.271383	0.400651	0.819932	18.095	-0.152245	0.349352	0.25381	0.713148
chr1	189650342	189652306	155.247	0.0605513	0.156404	0.591571	0.917366	155.247	-0.0578603	0.147859	0.562487	0.892578	155.247	-0.0940239	0.151526	0.264937	0.725238
chr1	189652417	189654017	145.367	0.333064	0.205681	0.0123858	0.147205	145.367	-0.0595494	0.152599	0.552132	0.889043	145.367	-0.523384	0.265058	0.00194799	0.0358113
chr1	189654042	189659860	612.275	0.112877	0.109692	0.232129	0.70228	612.275	0.0766027	0.105411	0.382831	0.81055	612.275	-0.0190846	0.0864244	0.743762	0.95352
chr1	189660298	189662257	178.638	0.136505	0.159528	0.234341	0.703733	178.638	0.0114596	0.144763	0.907982	0.980738	178.638	-0.089088	0.146763	0.28133	0.739367
chr1	189662629	189669122	607.978	0.152051	0.104405	0.0954982	0.487128	607.978	-0.0751598	0.10071	0.378327	0.807859	607.978	-0.216991	0.119508	0.0108058	0.119422
chr1	189669741	189670466	50.719	0.178875	0.258196	0.165446	0.617916	50.719	-0.00104165	0.193463	0.991084	0.998298	50.719	-0.169797	0.277107	0.161025	0.593717
chr1	189670502	189672337	157.789	0.233578	0.174561	0.0537184	0.36132	157.789	-0.0642084	0.148672	0.521218	0.87613	157.789	-0.351149	0.236701	0.0101338	0.114571
chr1	189672417	189672760	25.4141	0.340002	0.439124	0.0515884	0.352652	25.4141	0.155659	0.3083	0.168292	0.631031	25.4141	-0.0616181	0.24732	0.557818	0.903571
chr1	189673432	189673615	12.7268	0.091383	0.329599	0.447855	0.856766	12.7268	0.08575	0.309384	0.394181	0.817171	12.7268	0.0101634	0.293301	0.928657	0.98878
chr1	189675489	189675634	10.5245	0.135025	0.378447	0.297181	0.757413	10.5245	0.183056	0.427468	0.149922	0.604174	10.5245	0.0472446	0.314264	0.68928	0.94179
chr1	189675728	189675977	13.5921	0.126232	0.347034	0.319696	0.778324	13.5921	0.0894249	0.305989	0.375991	0.806453	13.5921	-0.0129446	0.284623	0.907898	0.984666
chr1	189681446	189681596	8.15221	0.312161	0.587308	0.0677389	0.408742	8.15221	0.414568	0.716433	0.0325894	0.292363	8.15221	0.0408016	0.341282	0.737498	0.951635
chr1	189692281	189692601	15.3653	0.18882	0.386174	0.180029	0.639556	15.3653	0.283315	0.48383	0.0653265	0.419361	15.3653	0.0571796	0.282911	0.611977	0.92236
chr1	189692625	189693297	43.0081	1.10443	0.532482	0.000596821	0.0167644	43.0081	0.717546	0.555787	0.00377044	0.0750155	43.0081	-0.0541557	0.204075	0.567343	0.907232
chr1	189693466	189693678	13.7849	0.381148	0.556995	0.0480156	0.337813	13.7849	0.198869	0.423498	0.12746	0.567994	13.7849	-0.0548751	0.293854	0.632681	0.92758
chr1	19010291	19010501	8.51369	-0.596119	0.790349	0.0134527	0.156091	8.51369	-0.03641	0.289261	0.696365	0.935527	8.51369	0.501335	0.743224	0.031919	0.241638
chr1	19010689	19011018	17.2845	-0.399961	0.553851	0.0424502	0.316508	17.2845	0.0190475	0.241357	0.832316	0.96611	17.2845	0.560945	0.652062	0.0255644	0.211059
chr1	19011348	19011538	8.13141	-0.22726	0.487641	0.133576	0.566635	8.13141	-0.060646	0.313839	0.533069	0.881077	8.13141	0.12388	0.412468	0.366931	0.804987
chr1	190475113	190475425	13.2801	0.00551638	0.304846	0.960735	0.995536	13.2801	0.735941	0.799189	0.00891353	0.132567	13.2801	0.788559	0.76149	0.0106591	0.118447
chr1	190475615	190475762	5.75453	0.0922445	0.406674	0.436698	NA	5.75453	0.265333	0.589232	0.0781471	0.459497	5.75453	0.14555	0.448634	0.307485	0.763829
chr1	190476279	190476448	7.00196	0.0480991	0.35989	0.674043	0.937973	7.00196	0.1797	0.468031	0.158485	0.617269	7.00196	0.140902	0.43085	0.31877	0.772499
chr1	190476735	190477196	18.1626	0.201033	0.394145	0.162049	0.613704	18.1626	0.803496	0.774998	0.0064568	0.106802	18.1626	0.200868	0.390968	0.172473	0.611292
chr1	190477746	190477891	5.78581	0.00579314	0.371664	0.958109	NA	5.78581	0.178023	0.488215	0.159065	0.617677	5.78581	0.21364	0.525456	0.177088	0.618353
chr1	190478301	190478632	15.6727	0.034964	0.289915	0.756517	0.959566	15.6727	0.582147	0.68826	0.0145476	0.179449	15.6727	0.498232	0.604883	0.0326983	0.244777
chr1	190478782	190479152	14.0412	-0.126203	0.370839	0.322659	0.781244	14.0412	0.397966	0.599068	0.0350221	0.304094	14.0412	1.15718	0.861951	0.00290055	0.0477984
chr1	1908212	1909089	88.3537	0.234356	0.22213	0.0726899	0.422133	88.3537	0.0287087	0.169244	0.770052	0.95261	88.3537	-0.162294	0.219405	0.131207	0.53808
chr1	1909379	1909670	19.5763	0.00906892	0.259493	0.934845	0.992472	19.5763	0.00113501	0.232412	0.989879	0.997983	19.5763	-0.00727516	0.252183	0.944764	0.991698
chr1	1918997	1919264	11.8766	-0.0415294	0.303097	0.714847	0.949643	11.8766	-0.0235633	0.267978	0.796095	0.95595	11.8766	0.0125367	0.301723	0.913227	0.985846
chr1	1919818	1920202	18.6404	-0.0934026	0.285572	0.431537	0.84971	18.6404	-0.147111	0.321154	0.190307	0.656357	18.6404	-0.0577396	0.275387	0.60352	0.9204
chr1	19209658	19210234	57.0218	0.0304149	0.201024	0.789456	0.966597	57.0218	0.0109621	0.183062	0.908459	0.980867	57.0218	-0.0132397	0.17474	0.878322	0.980562
chr1	19210552	19211020	45.7452	0.0810686	0.221924	0.48504	0.875164	45.7452	0.0803413	0.205571	0.41076	0.826762	45.7452	0.0107564	0.187551	0.90444	0.984088
chr1	19251282	19251452	11.0352	0.0999695	0.340674	0.412977	0.841521	11.0352	0.0572617	0.292608	0.549265	0.887975	11.0352	-0.0259769	0.303305	0.822143	0.971677
chr1	19251530	19252047	55.3928	-0.027273	0.203581	0.810327	0.971027	55.3928	0.0285917	0.185412	0.764551	0.951964	55.3928	0.0488219	0.187932	0.589984	0.916276
chr1	193058897	193059318	35.0507	-0.0440328	0.234439	0.696139	0.94435	35.0507	0.0574562	0.21523	0.541667	0.884445	35.0507	0.112068	0.26471	0.318286	0.771761
chr1	193059630	193060770	108.209	0.0261966	0.172404	0.8189	0.973021	108.209	-0.0592736	0.162955	0.553108	0.889469	108.209	-0.0697195	0.160337	0.412054	0.831122
chr1	193104773	193105375	42.2857	0.0231849	0.214957	0.836987	0.977353	42.2857	0.0275942	0.195708	0.76818	0.95223	42.2857	0.00791158	0.191687	0.930406	0.989136
chr1	193105575	193105784	16.748	0.0978467	0.298435	0.414719	0.84199	16.748	-0.017684	0.244038	0.844126	0.968538	16.748	-0.129674	0.334146	0.311328	0.766437
chr1	193111600	193112676	47.6104	0.0810389	0.216251	0.485531	0.875164	47.6104	-0.311755	0.353193	0.0313943	0.287223	47.6104	-0.734529	0.479781	0.00462139	0.0663118
chr1	19311841	19312064	19.5205	0.183414	0.353022	0.1825	0.642271	19.5205	0.126376	0.304202	0.23889	0.703217	19.5205	-0.0171123	0.249294	0.869837	0.97956
chr1	193122005	193122727	77.9578	-0.0740341	0.191024	0.523641	0.890781	77.9578	-0.134	0.193217	0.200236	0.666837	77.9578	-0.0556883	0.173049	0.523709	0.889303
chr1	19312321	19312834	38.746	0.0851277	0.230745	0.464641	0.865663	38.746	0.0324675	0.200604	0.72754	0.942726	38.746	-0.0362213	0.202742	0.699204	0.943283
chr1	19341281	19341451	4.16679	-0.172198	0.503929	0.178706	NA	4.16679	-0.0188403	0.347523	0.841409	NA	4.16679	0.164431	0.519055	0.244849	NA
chr1	1943846	1944021	6.43524	-0.093462	0.387302	0.438263	NA	6.43524	0.00944201	0.307422	0.919019	0.983218	6.43524	0.119909	0.42465	0.381453	0.813233
chr1	1944299	1944469	5.07891	-0.300339	0.603485	0.0650382	NA	5.07891	-0.214049	0.534377	0.115732	0.544577	5.07891	0.0416386	0.415726	0.737872	0.951829
chr1	19484474	19485544	80.9143	0.0413244	0.185361	0.71912	0.95102	80.9143	0.0499554	0.171908	0.612689	0.910078	80.9143	0.0117412	0.155185	0.885633	0.981868
chr1	19485739	19486331	57.0897	0.0840792	0.207921	0.470723	0.867242	57.0897	0.0678097	0.189543	0.487758	0.862425	57.0897	-0.00272126	0.172402	0.974709	0.996655
chr1	19596088	19596860	47.0634	0.205091	0.270127	0.124456	0.549451	47.0634	0.182218	0.256181	0.109688	0.531282	47.0634	0.00485718	0.182555	0.95615	0.993442
chr1	19597015	19597796	86.1609	0.213698	0.22031	0.0965943	0.489632	86.1609	0.269079	0.244647	0.0307479	0.282879	86.1609	0.0408056	0.158375	0.623418	0.924936
chr1	19664900	19665087	7.89708	-0.0739217	0.355321	0.531363	0.894182	7.89708	-0.0633407	0.327281	0.519586	0.875467	7.89708	-0.00164766	0.347349	0.989158	0.998277
chr1	196674048	196674233	8.07453	0.106354	0.377101	0.389637	0.826611	8.07453	0.134358	0.397344	0.241038	0.705361	8.07453	0.0377595	0.335091	0.75463	0.954904
chr1	196674455	196674618	10.516	0.134638	0.37868	0.298285	0.758353	10.516	0.219	0.466264	0.111654	0.535814	10.516	0.0675066	0.324878	0.577009	0.911575
chr1	196675438	196675859	20.4974	0.476567	0.56887	0.0267062	0.238355	20.4974	0.79942	0.741981	0.00600502	0.102248	20.4974	0.0593208	0.260776	0.58307	0.913529
chr1	197130227	197130702	22.83	0.701511	0.613263	0.00807533	0.110481	22.83	-0.109584	0.289544	0.289173	0.749202	22.83	-1.54198	0.630217	0.000279701	0.00815733
chr1	197135684	197136096	16.9786	-0.0322268	0.268688	0.773492	0.963361	16.9786	-0.0910326	0.281153	0.361617	0.798754	16.9786	-0.0716043	0.291501	0.534147	0.893405
chr1	197138973	197139197	8.77928	-0.0402706	0.318931	0.723851	0.951659	8.77928	-0.233967	0.507529	0.101706	0.514194	8.77928	-0.201705	0.474291	0.196575	0.645875
chr1	197141454	197141989	22.7744	-0.0298266	0.247965	0.789344	0.966597	22.7744	-0.124561	0.282948	0.2384	0.703217	22.7744	-0.106765	0.291133	0.363584	0.803044
chr1	197144735	197145307	26.5473	0.0961599	0.264922	0.416215	0.842856	26.5473	-0.199198	0.350854	0.110035	0.531957	26.5473	-0.605998	0.58305	0.0167364	0.159879
chr1	197145383	197145909	26.8227	0.19254	0.315872	0.157013	0.606085	26.8227	-0.090645	0.250325	0.357247	0.796277	26.8227	-0.545622	0.541828	0.0203163	0.182312
chr1	197146024	197146640	54.3045	0.173024	0.243542	0.17312	0.629263	54.3045	0.273426	0.30051	0.0386706	0.320868	54.3045	0.0649376	0.193573	0.483693	0.871762
chr1	197146866	197147684	63.0763	-0.191467	0.239873	0.137043	0.572819	63.0763	-0.0784863	0.188945	0.427096	0.833652	63.0763	0.0647098	0.191576	0.482935	0.871538
chr1	197200814	197201261	47.6342	0.182489	0.25562	0.157819	0.607494	47.6342	0.0827463	0.203986	0.398874	0.818868	47.6342	-0.0534978	0.196076	0.56407	0.906523
chr1	197201566	197202011	40.7428	0.0361181	0.217234	0.749366	0.957389	40.7428	-0.010172	0.196002	0.912782	0.98204	40.7428	-0.0401993	0.201876	0.66773	0.938197
chr1	19757973	19758337	21.3984	-0.0530963	0.258392	0.63943	0.927866	21.3984	-0.363627	0.507618	0.0356978	0.30707	21.3984	-0.272353	0.437776	0.102006	0.472967
chr1	19758536	19758745	11.2026	-0.12266	0.351306	0.331796	0.787241	11.2026	-0.203063	0.438296	0.125	0.562905	11.2026	-0.0693671	0.334808	0.571832	0.908761
chr1	19758856	19759870	36.9162	-0.124127	0.245317	0.305593	0.765306	36.9162	-0.841094	0.58775	0.00238197	0.0551649	36.9162	-0.371372	0.43108	0.0427414	0.287675
chr1	19764131	19765105	41.6699	-0.41627	0.396282	0.0215171	0.208663	41.6699	-0.651905	0.515504	0.00431397	0.0817492	41.6699	-0.0531023	0.214063	0.58413	0.91396
chr1	19765216	19765743	33.5663	-0.181033	0.289677	0.170112	0.625438	33.5663	-0.0999006	0.23141	0.316397	0.769012	33.5663	0.0371871	0.218911	0.703351	0.943964
chr1	19765834	19766774	42.8776	-0.189374	0.268726	0.149159	0.592354	42.8776	-0.260801	0.321754	0.0494571	0.365876	42.8776	-0.0491039	0.20821	0.607004	0.920842
chr1	19775676	19775846	8.21517	-0.0813636	0.34826	0.495149	0.879833	8.21517	-0.0997281	0.352286	0.344602	0.786505	8.21517	-0.0315043	0.341837	0.795179	0.96599
chr1	197775138	197775365	20.657	0.458671	0.54614	0.0283934	0.247191	20.657	0.083604	0.271712	0.394191	0.817171	20.657	-0.196709	0.374082	0.171301	0.609754
chr1	197902237	197902865	50.6449	0.0966185	0.222553	0.411195	0.840098	50.6449	0.0351338	0.193113	0.710059	0.938917	50.6449	-0.0415108	0.193047	0.650286	0.933172
chr1	19799263	19800650	90.4964	0.0278207	0.178392	0.808251	0.971027	90.4964	-0.128374	0.181471	0.216996	0.683597	90.4964	-0.155428	0.214226	0.140841	0.557189
chr1	198156458	198157574	104.84	0.144054	0.182186	0.226109	0.696041	104.84	-0.198933	0.19559	0.074031	0.446677	104.84	-0.567923	0.314253	0.00282571	0.0471666
chr1	198157855	198158245	25.1402	0.226889	0.34724	0.116874	0.535192	25.1402	-0.150922	0.308834	0.178369	0.642266	25.1402	-0.941686	0.639567	0.0039977	0.0599807
chr1	198158577	198159109	42.9605	0.202447	0.279608	0.131132	0.562197	42.9605	-0.0471813	0.203922	0.615761	0.911525	42.9605	-0.344282	0.393237	0.044567	0.295179
chr1	198159297	198159911	43.8266	0.266112	0.304851	0.0678861	0.409187	43.8266	-0.112488	0.225773	0.268572	0.731383	43.8266	-0.789292	0.487203	0.00356491	0.0551357
chr1	198258041	198258500	13.1737	-0.11977	0.337961	0.339232	0.793824	13.1737	-0.620644	0.768549	0.013857	0.173938	13.1737	-0.266096	0.501504	0.122931	0.520675
chr1	19882422	19882778	29.5089	0.313472	0.396035	0.0572088	0.375005	29.5089	0.242789	0.360122	0.0694291	0.432464	29.5089	-0.00931298	0.212758	0.922511	0.98745
chr1	200409811	200409956	14.5961	0.0518535	0.29394	0.649919	0.931179	14.5961	0.0532306	0.270104	0.570656	0.896297	14.5961	0.0122688	0.279751	0.911926	0.985236
chr1	200410201	200410436	11.2432	-0.0481144	0.312017	0.674321	0.937973	11.2432	-0.00896511	0.269238	0.921259	0.983434	11.2432	0.0380785	0.315272	0.746802	0.95373
chr1	200620423	200620703	18.287	0.0740812	0.296935	0.525757	0.891576	18.287	0.322723	0.505846	0.0494529	0.365876	18.287	0.195801	0.39166	0.18155	0.625682
chr1	200639824	200640085	16.128	-0.285785	0.453052	0.0839032	0.455192	16.128	-0.160626	0.348149	0.169617	0.63335	16.128	0.0427249	0.286213	0.704974	0.944288
chr1	200668952	200669920	102.609	-0.0884564	0.179804	0.447087	0.856276	102.609	0.0581299	0.163385	0.560508	0.892005	102.609	0.131627	0.193741	0.1801	0.623574
chr1	200670171	200670973	53.7423	-0.00513556	0.20208	0.963865	0.995931	53.7423	-0.0361345	0.186935	0.705433	0.93738	53.7423	-0.0292856	0.181694	0.740602	0.952845
chr1	200738946	200739749	90.5745	0.126878	0.194146	0.287258	0.748841	90.5745	0.307376	0.257581	0.0187537	0.210784	90.5745	0.126243	0.197777	0.20041	0.650043
chr1	201154112	201154492	22.6663	0.15755	0.315632	0.226705	0.696467	22.6663	0.0261509	0.230169	0.772393	0.952693	22.6663	-0.109058	0.292152	0.355012	0.798009
chr1	201171098	201171490	26.3929	1.5295	0.648889	0.000236531	0.00813819	26.3929	0.130027	0.306683	0.229184	0.694506	26.3929	-0.723597	0.61554	0.0101424	0.114571
chr1	201171672	201171851	8.57786	1.18729	1.06848	0.000594508	0.0167306	8.57786	0.145151	0.48026	0.208073	0.674808	8.57786	-0.957659	0.918138	0.0054705	0.0750305
chr1	201460670	201461178	28.0517	-0.127496	0.286127	0.302508	0.762028	28.0517	-0.0196472	0.218294	0.828194	0.964792	28.0517	0.0920159	0.272715	0.413342	0.831808
chr1	201461365	201461975	55.6939	-0.314558	0.309776	0.0394794	0.302237	55.6939	-0.0349539	0.183484	0.716131	0.939047	55.6939	0.228104	0.299295	0.0881013	0.438147
chr1	201462098	201462692	38.3364	-0.0815263	0.2351	0.482311	0.873714	38.3364	0.0922626	0.218622	0.349966	0.790741	38.3364	0.231255	0.337275	0.103415	0.476399
chr1	201462868	201463038	8.69383	-0.0541151	0.336468	0.639481	0.927866	8.69383	0.0501033	0.301337	0.599163	0.903594	8.69383	0.137541	0.407451	0.323464	0.776387
chr1	201482318	201482515	6.16476	-0.0397098	0.356221	0.726661	NA	6.16476	-0.162685	0.46937	0.183458	0.647592	6.16476	-0.139009	0.458604	0.323504	0.776387
chr1	201713127	201713385	9.09261	-0.142107	0.384692	0.278394	0.743472	9.09261	-0.5572	0.787766	0.0178333	0.203427	9.09261	-0.21472	0.492912	0.179008	0.622038
chr1	201713577	201713851	8.57978	-0.181932	0.43474	0.195425	0.660663	8.57978	-0.095355	0.342627	0.360256	0.797769	8.57978	0.049064	0.350497	0.690609	0.94187
chr1	201713950	201714649	30.6715	-1.25283	0.592681	0.000510896	0.0149209	30.6715	-1.39438	0.606086	0.000295012	0.0124768	30.6715	-0.0117309	0.233486	0.907282	0.984385
chr1	201714791	201715786	31.7907	-1.05183	0.591932	0.00122272	0.0293414	31.7907	-1.31641	0.603672	0.000381319	0.0151597	31.7907	-0.0306642	0.23247	0.760813	0.956955
chr1	201829200	201829569	29.3526	0.159813	0.289832	0.214618	0.683421	29.3526	0.0716452	0.22905	0.452952	0.844667	29.3526	-0.0499236	0.228291	0.61854	0.923509
chr1	201954726	201955270	32.2567	0.00368127	0.228397	0.97365	0.997534	32.2567	0.0538239	0.213284	0.566312	0.89461	32.2567	0.0534219	0.223747	0.590665	0.916484
chr1	201955564	201955794	17.1489	0.0314041	0.26863	0.779028	0.964497	17.1489	0.0185558	0.239427	0.836504	0.966777	17.1489	-0.00806152	0.258751	0.939645	0.991135
chr1	201982694	201983156	40.2945	0.0586393	0.223709	0.607515	0.921883	40.2945	0.00109936	0.198043	0.990508	0.998078	40.2945	-0.0480219	0.208297	0.614879	0.923
chr1	202018197	202018563	20.1368	1.06534	0.753309	0.0024073	0.0480052	20.1368	0.81252	0.765784	0.00607662	0.10302	20.1368	-0.0342649	0.248992	0.743319	0.95352
chr1	202144049	202144345	16.316	0.102302	0.304243	0.397438	0.832611	16.316	0.00259278	0.243701	0.976899	0.994225	16.316	-0.0990588	0.310724	0.412293	0.831206
chr1	202806422	202806690	13.2793	0.0746261	0.30772	0.524513	0.891089	13.2793	-0.026677	0.265124	0.769949	0.95261	13.2793	-0.120929	0.353454	0.353752	0.797223
chr1	202806727	202808324	120.25	0.0784732	0.170757	0.496042	0.879893	120.25	0.232498	0.193013	0.0412336	0.331442	120.25	0.127577	0.179128	0.176005	0.617502
chr1	202888491	202889163	71.0451	0.0347029	0.193635	0.761754	0.960921	71.0451	0.150018	0.204342	0.159632	0.618122	71.0451	0.107827	0.203748	0.272304	0.732388
chr1	202926570	202927252	60.0255	0.09465	0.20842	0.420034	0.84478	60.0255	-0.0143646	0.182925	0.880355	0.977062	60.0255	-0.093626	0.206935	0.338207	0.786519
chr1	202927355	202927640	11.9859	0.083057	0.321574	0.484859	0.875164	11.9859	-0.0249488	0.272745	0.78518	0.954202	11.9859	-0.130051	0.371386	0.332336	0.782826
chr1	202958051	202958247	20.1475	-0.022652	0.258514	0.83876	0.97809	20.1475	0.0328237	0.233181	0.717916	0.93944	20.1475	0.0617404	0.2673	0.573245	0.909508
chr1	203006793	203007204	25.0357	0.0360186	0.246309	0.747777	0.957158	25.0357	0.044616	0.225286	0.628343	0.915006	25.0357	0.0159649	0.229561	0.872944	0.979665
chr1	203007435	203007805	31.9244	0.0610546	0.237779	0.592357	0.917702	31.9244	7.01549e-05	0.20809	0.999385	0.999807	31.9244	-0.0536958	0.227364	0.591976	0.917001
chr1	203127913	203128192	7.04832	-0.150939	0.426002	0.254903	0.722353	7.04832	-0.0297735	0.303736	0.750512	0.948601	7.04832	0.112522	0.410465	0.405373	0.827033
chr1	203305587	203306083	35.6758	1.30055	0.535966	0.000255665	0.00865332	35.6758	0.0341886	0.214426	0.709594	0.938622	35.6758	-1.11922	0.52706	0.000894038	0.020216
chr1	203306410	203306615	7.51212	0.274601	0.529522	0.0935468	0.481859	7.51212	-0.147507	0.455839	0.211707	0.679232	7.51212	-0.875054	0.947364	0.00612317	0.0806342
chr1	203327063	203327251	9.8366	1.03606	0.945446	0.00238997	0.0477888	9.8366	0.155102	0.444333	0.198423	0.665323	9.8366	-0.422933	0.635923	0.0509381	0.31989
chr1	203327626	203327979	30.8182	0.921481	0.600204	0.00239103	0.0477888	30.8182	0.0995001	0.249145	0.319133	0.771171	30.8182	-0.403864	0.455359	0.036934	0.264815
chr1	203512263	203512433	5.31788	-0.0710608	0.3784	0.54268	NA	5.31788	-0.090062	0.38187	0.388602	0.814501	5.31788	-0.0312351	0.386074	0.801614	0.967349
chr1	203512450	203512887	20.7956	-0.0785696	0.275543	0.499858	0.880631	20.7956	-0.00795431	0.227615	0.929304	0.984358	20.7956	0.0649286	0.270474	0.556601	0.902817
chr1	203513027	203514158	76.9802	-0.296764	0.257836	0.0367215	0.290877	76.9802	-0.349761	0.293922	0.0135399	0.171713	76.9802	-0.0309801	0.165232	0.713851	0.945776
chr1	203557862	203558114	10.977	0.000748062	0.297993	0.994663	0.999149	10.977	-0.677737	0.861791	0.0111416	0.152546	10.977	-0.770665	0.845624	0.0110948	0.121651
chr1	203558917	203559160	13.153	0.18053	0.382069	0.193845	0.658457	13.153	-0.229657	0.473061	0.102377	0.515516	13.153	-1.03895	0.840806	0.00438837	0.0640817
chr1	203626491	203626642	10.9416	0.0336961	0.309513	0.766117	0.961811	10.9416	0.0796475	0.310651	0.424705	0.83315	10.9416	0.059919	0.322751	0.618171	0.923498
chr1	203626891	203627404	39.927	0.0475352	0.219177	0.675578	0.938069	39.927	-0.0736235	0.210461	0.445443	0.841262	39.927	-0.134462	0.262887	0.238344	0.696089
chr1	203627713	203628382	25.0289	0.00609298	0.240553	0.956226	0.99472	25.0289	-0.140281	0.290389	0.197822	0.664795	25.0289	-0.182922	0.345485	0.180769	0.624397
chr1	203662904	203663108	7.42491	-0.390598	0.648939	0.0410856	0.309968	7.42491	-0.0566324	0.314073	0.558535	0.891721	7.42491	0.25895	0.553732	0.129559	0.534617
chr1	203663580	203663914	12.7709	-0.486277	0.633729	0.0276274	0.242979	12.7709	-0.162016	0.373768	0.173896	0.638096	12.7709	0.118389	0.367173	0.370168	0.806626
chr1	203671763	203672001	6.46615	-0.159737	0.445812	0.23227	0.702309	6.46615	-0.0416509	0.321183	0.662708	0.925521	6.46615	0.10367	0.416513	0.438596	0.847494
chr1	203672630	203674236	91.7096	-1.47141	0.303056	1.94663e-07	1.94276e-05	91.7096	0.074777	0.167295	0.456439	0.846743	91.7096	1.66106	0.299203	3.53764e-09	5.16348e-07
chr1	203674943	203675113	5.71132	-0.14109	0.443725	0.270673	NA	5.71132	0.0323821	0.321849	0.732346	0.943748	5.71132	0.231606	0.543677	0.154281	0.58198
chr1	203795044	203795373	18.999	0.0197752	0.263531	0.858949	0.981207	18.999	0.0870144	0.267535	0.376873	0.806805	18.999	0.0801256	0.283726	0.482418	0.871394
chr1	203795643	203796015	46.0369	0.0725487	0.221273	0.529461	0.893306	46.0369	0.234342	0.293712	0.0617859	0.409743	46.0369	0.138897	0.253288	0.216593	0.671528
chr1	203796104	203796616	40.4422	-0.0699432	0.224653	0.543289	0.897929	40.4422	0.00396258	0.194842	0.966005	0.991961	40.4422	0.0635481	0.214206	0.51461	0.885935
chr1	203861651	203862011	27.1183	0.0567605	0.246911	0.617265	0.923792	27.1183	0.0807692	0.236735	0.403757	0.821663	27.1183	0.0330202	0.227221	0.740092	0.952611
chr1	203887816	203888881	49.1981	-0.858161	0.496803	0.0015377	0.0344085	49.1981	-0.200339	0.262961	0.0875519	0.482516	49.1981	0.194199	0.299824	0.132496	0.540541
chr1	203888996	203890003	67.7433	-0.325459	0.293129	0.031432	0.264652	67.7433	-0.141841	0.203731	0.17945	0.643416	67.7433	0.0772755	0.193841	0.408683	0.828662
chr1	203890346	203890667	12.6632	-0.0971872	0.325138	0.422278	0.845963	12.6632	-0.088605	0.304222	0.379237	0.808308	12.6632	-0.00811144	0.296194	0.943289	0.991691
chr1	203891108	203891387	10.5542	-0.144937	0.374468	0.270181	0.736568	10.5542	-0.213876	0.455041	0.115406	0.54383	10.5542	-0.0575195	0.333268	0.63636	0.92868
chr1	203905544	203906994	98.4156	-0.0698418	0.177841	0.545697	0.898938	98.4156	-0.0946667	0.169529	0.35099	0.791874	98.4156	-0.0259972	0.149292	0.746367	0.953618
chr1	203907325	203907880	42.2995	0.0387564	0.216655	0.732118	0.953437	42.2995	0.0603768	0.201741	0.527736	0.878374	42.2995	0.0261543	0.194056	0.774763	0.959898
chr1	204073177	204073795	42.7315	0.252224	0.302255	0.078859	0.441048	42.7315	-0.00863947	0.196135	0.925837	0.984283	42.7315	-0.284892	0.353328	0.063606	0.364216
chr1	204410803	204410989	8.22381	-0.00342638	0.316665	0.975652	0.997677	8.22381	-0.0674608	0.322377	0.494207	0.864399	8.22381	-0.0831923	0.366159	0.515409	0.886312
chr1	204411079	204411768	61.9178	0.227685	0.259013	0.0917196	0.478275	61.9178	0.123867	0.207561	0.23082	0.695675	61.9178	-0.0440404	0.179927	0.618697	0.923509
chr1	204412166	204412458	18.8145	-0.106873	0.302184	0.378925	0.819466	18.8145	-0.00911654	0.234244	0.918928	0.983218	18.8145	0.0925521	0.301329	0.434739	0.844739
chr1	204506694	204506994	16.9404	-0.154464	0.352913	0.242936	0.712487	16.9404	-0.0564525	0.262477	0.547685	0.887432	16.9404	0.0672751	0.301345	0.564847	0.906811
chr1	204507187	204507768	50.9518	0.00935723	0.206733	0.934018	0.992117	50.9518	0.162714	0.233086	0.137388	0.583011	50.9518	0.163099	0.260918	0.162745	0.596425
chr1	204507853	204508282	32.1824	-0.175938	0.288572	0.179629	0.638822	32.1824	-0.123233	0.24796	0.235189	0.7003	32.1824	0.0159528	0.215033	0.86849	0.979423
chr1	204515864	204517077	100.191	0.0894453	0.180299	0.442299	0.854258	100.191	0.129342	0.175767	0.213578	0.680803	100.191	0.0380087	0.150084	0.638555	0.929278
chr1	2049688	2050094	32.5414	0.340625	0.396019	0.0442766	0.324064	32.5414	0.0504819	0.21721	0.588095	0.901608	32.5414	-0.202053	0.328862	0.137607	0.550798
chr1	2050534	2050932	27.6158	0.205001	0.328475	0.140927	0.579633	27.6158	0.0679902	0.233393	0.473659	0.856462	27.6158	-0.0825406	0.254031	0.443629	0.849837
chr1	20507911	20508096	15.9781	0.0720806	0.289997	0.53517	0.894622	15.9781	0.0561593	0.260055	0.549195	0.887975	15.9781	-0.00266421	0.263688	0.980232	0.997089
chr1	205122024	205122270	30.2752	0.0931466	0.253173	0.42814	0.848565	30.2752	0.0680695	0.225302	0.473916	0.856622	30.2752	-0.00776436	0.214847	0.935699	0.990292
chr1	205122435	205122717	20.158	0.13871	0.315525	0.27559	0.740971	20.158	0.0791986	0.262392	0.414416	0.829138	20.158	-0.0295164	0.25185	0.779014	0.961303
chr1	205211149	205211673	41.3242	0.571763	0.473031	0.00901617	0.118633	41.3242	0.395483	0.422255	0.0188253	0.211362	41.3242	-0.0256426	0.192919	0.778377	0.961129
chr1	205630974	205631840	77.844	0.0936284	0.192855	0.424149	0.847245	77.844	0.0578679	0.174795	0.557897	0.891406	77.844	-0.0179134	0.157739	0.827797	0.973457
chr1	205632133	205632371	19.6913	0.23891	0.402948	0.115913	0.532891	19.6913	0.375832	0.529999	0.0347209	0.302973	19.6913	0.0593944	0.265247	0.586027	0.914659
chr1	205748310	205748702	19.2235	0.0900471	0.279646	0.445579	0.855547	19.2235	-0.540721	0.65983	0.016957	0.197393	19.2235	-1.2075	0.747838	0.00196062	0.0359802
chr1	205748811	205749364	44.0235	0.227812	0.28708	0.0996751	0.496234	44.0235	-0.042704	0.200107	0.64983	0.921654	44.0235	-0.370826	0.397257	0.0359416	0.260064
chr1	205749741	205750197	45.8463	0.19602	0.271312	0.138779	0.575745	45.8463	0.113808	0.222223	0.263944	0.727717	45.8463	-0.0340104	0.193174	0.709718	0.945127
chr1	205750437	205750757	33.9635	-0.016547	0.226468	0.882298	0.986294	33.9635	0.00890765	0.203644	0.922569	0.983668	33.9635	0.0233648	0.210281	0.806311	0.968334
chr1	205812645	205813096	36.1621	-0.028563	0.226319	0.799041	0.968732	36.1621	-0.0910033	0.227953	0.354803	0.793873	36.1621	-0.067958	0.231529	0.504362	0.881698
chr1	205813415	205813598	15.9806	-0.0101711	0.271831	0.927107	0.991831	15.9806	-0.0336855	0.250558	0.711624	0.939038	15.9806	-0.0305267	0.275283	0.781953	0.961754
chr1	20611937	20612302	22.9483	-0.00072613	0.246407	0.994774	0.999149	22.9483	-0.0385379	0.228602	0.673478	0.929392	22.9483	-0.0431822	0.246999	0.67917	0.940931
chr1	20612769	20614607	175.902	0.097573	0.153592	0.386638	0.825135	175.902	-0.0432824	0.143401	0.662921	0.925521	175.902	-0.112643	0.154168	0.192902	0.641297
chr1	20614681	20614861	12.2682	-0.00377061	0.285923	0.97302	0.997482	12.2682	-0.100973	0.319528	0.330664	0.777987	12.2682	-0.123496	0.361421	0.349176	0.793881
chr1	206203588	206203790	13.6407	0.0563167	0.296155	0.623601	0.92472	13.6407	0.0348128	0.261833	0.704053	0.937164	13.6407	-0.0126431	0.281385	0.909518	0.984711
chr1	206205007	206205177	9.33518	0.14178	0.388793	0.279426	0.744232	9.33518	0.0225262	0.290512	0.807487	0.959222	9.33518	-0.111628	0.374376	0.398341	0.822058
chr1	20633533	20633921	40.656	0.00145049	0.215201	0.989694	0.999149	40.656	-0.128493	0.237008	0.218235	0.68465	40.656	-0.14531	0.272114	0.215001	0.66869
chr1	20661063	20661338	17.4321	0.0479824	0.272965	0.671677	0.937465	17.4321	0.0313632	0.242573	0.729672	0.943332	17.4321	-0.00857263	0.25754	0.935667	0.990292
chr1	206612094	206612426	19.2137	0.027889	0.259789	0.802627	0.969891	19.2137	-0.00428193	0.231532	0.961846	0.991021	19.2137	-0.0315923	0.255259	0.765662	0.957592
chr1	206612703	206612873	7.36614	-0.0529777	0.342489	0.646135	0.930228	7.36614	-0.0574463	0.322525	0.555109	0.890171	7.36614	-0.0155131	0.347388	0.898343	0.983025
chr1	20661770	20661923	18.5552	0.178299	0.355	0.192448	0.656188	18.5552	0.0758579	0.268528	0.433222	0.835729	18.5552	-0.0586143	0.273227	0.596649	0.918806
chr1	206635597	206635890	19.6261	0.0655409	0.274232	0.568477	0.909885	19.6261	0.0690887	0.255164	0.468485	0.853646	19.6261	0.0158314	0.250565	0.879816	0.98093
chr1	206684969	206685148	9.33275	-0.00623626	0.307937	0.955648	0.994621	9.33275	-0.0722959	0.316687	0.465451	0.852347	9.33275	-0.0853572	0.356744	0.501705	0.880515
chr1	20696589	20697465	82.6056	-0.0950335	0.189216	0.417092	0.842856	82.6056	-0.163016	0.197502	0.130844	0.571695	82.6056	-0.0602008	0.170401	0.488588	0.874551
chr1	207050627	207051316	42.621	0.102258	0.229463	0.386962	0.825302	42.621	-0.0106244	0.195087	0.909085	0.980887	42.621	-0.102716	0.234223	0.326655	0.778771
chr1	20731183	20731388	5.52797	-0.143728	0.440039	0.266548	NA	5.52797	-0.239729	0.567532	0.0933686	0.4961	5.52797	-0.076177	0.422842	0.554398	0.90214
chr1	207321733	207321959	14.2402	0.0796587	0.315105	0.500359	0.880631	14.2402	0.234839	0.449704	0.094189	0.498563	14.2402	0.13263	0.354645	0.314816	0.768933
chr1	20732435	20733149	101.374	-0.292743	0.235958	0.0334548	0.274898	101.374	-0.0205231	0.162359	0.835581	0.966437	101.374	0.242464	0.254358	0.0541536	0.330621
chr1	20733305	20734684	89.5884	-0.416366	0.294191	0.009668	0.124847	89.5884	-0.0521178	0.167496	0.599595	0.903741	89.5884	0.290288	0.285136	0.0379448	0.26861
chr1	207751397	207751910	31.5988	0.0391141	0.231052	0.728172	0.952216	31.5988	-0.0326247	0.21025	0.723031	0.941626	31.5988	-0.0724493	0.236932	0.482968	0.871538
chr1	207752126	207752431	24.8288	0.130657	0.287555	0.292845	0.753384	24.8288	0.0886484	0.249384	0.36627	0.800826	24.8288	-0.0153981	0.22835	0.877061	0.980401
chr1	207752586	207752869	12.0388	0.00259261	0.29137	0.981474	0.998977	12.0388	0.00823296	0.261049	0.927314	0.984283	12.0388	0.00766888	0.29293	0.946095	0.991996
chr1	20786094	20786714	64.8882	0.0754961	0.198698	0.515584	0.888074	64.8882	-0.0193322	0.178648	0.841026	0.968025	64.8882	-0.0792793	0.191366	0.394381	0.81972
chr1	207868906	207869124	12.8388	-0.156833	0.365639	0.239802	0.709147	12.8388	-0.254432	0.474445	0.08245	0.469933	12.8388	-0.0678439	0.32114	0.573235	0.909508
chr1	20786893	20787308	62.2815	0.120649	0.213133	0.313377	0.77302	62.2815	0.203464	0.239876	0.0789146	0.460774	62.2815	0.0677813	0.186518	0.457398	0.856813
chr1	207869257	207869554	10.5328	-0.0294281	0.302496	0.79422	0.96766	10.5328	-0.111972	0.345853	0.297293	0.755027	10.5328	-0.100658	0.359496	0.43528	0.845004
chr1	20787368	20788401	109.197	0.180344	0.193656	0.141	0.579773	109.197	0.0800586	0.166626	0.426751	0.833652	109.197	-0.0567649	0.155127	0.493899	0.877388
chr1	20788509	20788894	18.3178	0.0993922	0.299887	0.408524	0.838315	18.3178	0.00261901	0.24157	0.976656	0.994175	18.3178	-0.0955667	0.305375	0.423916	0.837792
chr1	207963322	207963558	18.1692	0.00820134	0.261514	0.941072	0.992733	18.1692	-0.0435517	0.245796	0.635626	0.916832	18.1692	-0.0609979	0.277197	0.585008	0.914471
chr1	21022543	21023104	42.8601	-0.0818848	0.227534	0.480691	0.872216	42.8601	0.0327865	0.196365	0.726782	0.942459	42.8601	0.114052	0.245812	0.292269	0.74975
chr1	21023382	21023565	7.33897	-0.143333	0.425335	0.272175	0.737698	7.33897	0.0456268	0.311357	0.632519	0.915893	7.33897	0.271311	0.555796	0.120209	0.513898
chr1	21091030	21091224	9.4507	0.0331113	0.315744	0.770263	0.963104	9.4507	0.0014099	0.281075	0.987678	0.997135	9.4507	-0.033002	0.323567	0.78158	0.961754
chr1	21091400	21092054	31.5342	-0.172587	0.295896	0.188373	0.651245	31.5342	-0.134551	0.264759	0.206205	0.673084	31.5342	0.00598076	0.220947	0.95119	0.992975
chr1	211257579	211257863	12.3113	1.00037	0.852199	0.00340092	0.0612524	12.3113	0.121146	0.365194	0.272149	0.734404	12.3113	-0.414586	0.589333	0.0515955	0.322199
chr1	211257975	211259189	129.404	0.143718	0.172889	0.221779	0.691325	129.404	0.0710723	0.155977	0.47969	0.85964	129.404	-0.0406882	0.139068	0.602391	0.920064
chr1	211259382	211259867	63.0079	-0.028254	0.196886	0.80444	0.970415	63.0079	-0.00595983	0.179281	0.950507	0.988181	63.0079	0.0159344	0.170681	0.852186	0.977526
chr1	211260006	211260851	64.8281	0.183742	0.230145	0.147908	0.590569	64.8281	-0.119942	0.203875	0.243733	0.708107	64.8281	-0.534517	0.39603	0.00917803	0.106594
chr1	211326462	211326677	9.67074	-0.0679609	0.330535	0.561782	0.90679	9.67074	-0.0195168	0.27841	0.831237	0.965742	9.67074	0.0446007	0.329094	0.710893	0.945225
chr1	211326972	211327128	9.97935	0.0893694	0.349834	0.458564	0.862957	9.97935	0.0680314	0.315995	0.489347	0.863352	9.97935	-0.00632714	0.317439	0.957072	0.993892
chr1	211382445	211382665	14.7341	-0.172906	0.385999	0.208878	0.676071	14.7341	0.00959003	0.252155	0.915041	0.982445	14.7341	0.211539	0.434986	0.1728	0.611966
chr1	211382799	211383498	57.6305	0.0391732	0.202563	0.731396	0.953022	57.6305	0.0967363	0.197143	0.334449	0.78098	57.6305	0.0560842	0.187304	0.536676	0.895012
chr1	211577970	211579141	85.265	-0.00313862	0.180803	0.97812	0.998345	85.265	-0.0783616	0.173462	0.434221	0.836122	85.265	-0.0653405	0.1693	0.452332	0.854562
chr1	211579587	211579777	8.33284	-0.0247139	0.323616	0.826856	0.97511	8.33284	-0.0429236	0.304459	0.650605	0.922075	8.33284	-0.0280629	0.338503	0.816354	0.970885
chr1	211675281	211675519	16.6432	0.159146	0.371277	0.235476	0.704738	16.6432	1.37339	0.855701	0.00105829	0.0314492	16.6432	0.51448	0.60208	0.0296456	0.23142
chr1	211676109	211676493	22.9706	-0.0398226	0.261211	0.722929	0.951459	22.9706	0.202727	0.354031	0.106537	0.524311	22.9706	0.38236	0.494895	0.0508852	0.319621
chr1	21176011	21176257	13.9047	-0.107875	0.326437	0.379816	0.820091	13.9047	0.0207334	0.250266	0.818299	0.961653	13.9047	0.151928	0.373987	0.268962	0.729689
chr1	21176335	21176816	22.4084	0.0106894	0.247792	0.923248	0.991545	22.4084	-0.00794807	0.222824	0.929504	0.984358	22.4084	-0.018842	0.238794	0.853491	0.977526
chr1	21177098	21177422	18.3446	0.0382827	0.265575	0.733159	0.953499	18.3446	0.0161587	0.235238	0.857196	0.971252	18.3446	-0.0171601	0.254349	0.870872	0.97956
chr1	211830468	211830720	19.8628	0.0151559	0.256834	0.891442	0.987796	19.8628	0.0143128	0.230324	0.873337	0.975455	19.8628	0.00228281	0.246921	0.982454	0.997292
chr1	212034842	212035150	22.9149	0.0657086	0.257601	0.56615	0.908855	22.9149	-0.0311807	0.227154	0.731464	0.9437	22.9149	-0.10685	0.287041	0.35972	0.800127
chr1	212035306	212035519	22.3794	0.0884499	0.279614	0.452891	0.859811	22.3794	0.227436	0.382949	0.0873639	0.482416	22.3794	0.114412	0.296669	0.337572	0.786502
chr1	212284778	212285041	23.3976	0.0606363	0.261195	0.595065	0.918601	23.3976	0.236747	0.37878	0.0782643	0.459583	23.3976	0.159531	0.325613	0.219268	0.674446
chr1	212285483	212286449	137.933	0.155204	0.181902	0.193998	0.658602	137.933	0.158017	0.175086	0.136606	0.581641	137.933	0.0141848	0.138675	0.854585	0.977526
chr1	212433070	212433251	13.1612	0.0538952	0.308462	0.639154	0.927866	13.1612	-0.0179735	0.270971	0.843563	0.968369	13.1612	-0.0823768	0.334751	0.505454	0.882379
chr1	212558663	212558913	22.8537	-0.0681813	0.262637	0.552868	0.902187	22.8537	0.0298915	0.224064	0.742202	0.946493	22.8537	0.108046	0.289702	0.357067	0.798828
chr1	212561555	212561751	6.94811	-0.0745501	0.360029	0.527952	0.892305	6.94811	-0.0500964	0.319889	0.603041	0.90573	6.94811	0.0141723	0.352966	0.907456	0.984427
chr1	212608830	212609080	10.1157	0.114271	0.358826	0.360941	0.807209	10.1157	-0.00217531	0.281502	0.980996	0.995668	10.1157	-0.126806	0.383021	0.348306	0.793519
chr1	21261534	21261789	10.8896	-0.717701	0.840136	0.00830808	0.112744	10.8896	0.0135784	0.269606	0.881178	0.977257	10.8896	0.933357	0.929016	0.00570519	0.0771369
chr1	21262122	21262789	25.6787	-0.436085	0.505818	0.0295891	0.254151	25.6787	0.0658517	0.228627	0.486665	0.862146	25.6787	0.917713	0.644222	0.00453621	0.0655682
chr1	212791441	212791746	25.2389	0.156805	0.30603	0.225972	0.696038	25.2389	0.0686857	0.239916	0.469529	0.854253	25.2389	-0.0514218	0.243289	0.620368	0.924133
chr1	212791940	212792394	29.5858	0.0767484	0.246176	0.506596	0.883663	29.5858	0.0259653	0.212519	0.776252	0.952717	29.5858	-0.0377983	0.222931	0.701547	0.94367
chr1	212857485	212858067	38.2356	0.0600784	0.225081	0.598943	0.919167	38.2356	-0.0619869	0.210028	0.514335	0.873134	38.2356	-0.13574	0.268743	0.23964	0.697407
chr1	212858293	212858988	63.467	0.0038041	0.194775	0.973354	0.997532	63.467	-0.0126451	0.178821	0.895419	0.978486	63.467	-0.0139844	0.168932	0.869415	0.97956
chr1	213014983	213015833	72.0153	0.0977801	0.199914	0.405484	0.836864	72.0153	0.133498	0.197286	0.201786	0.66881	72.0153	0.037401	0.167418	0.660734	0.936492
chr1	213015973	213016458	32.997	-0.00398213	0.228983	0.97149	0.997401	32.997	-0.0496659	0.215178	0.59431	0.902932	32.997	-0.0493734	0.226246	0.620665	0.924355
chr1	213050821	213051242	34.6035	-0.0360526	0.227916	0.74859	0.957227	34.6035	0.00730188	0.202715	0.936564	0.985585	34.6035	0.0386963	0.214433	0.688796	0.941786
chr1	213051340	213051617	23.7405	0.216377	0.353872	0.131666	0.563456	23.7405	0.0483016	0.234876	0.601018	0.904387	23.7405	-0.118661	0.294288	0.319488	0.773301
chr1	21324002	21327338	249.18	-0.062476	0.141288	0.566311	0.908947	249.18	0.208082	0.145167	0.0445332	0.347118	249.18	0.303797	0.192646	0.0100504	0.113942
chr1	21327383	21327767	22.0928	-0.0230051	0.252787	0.836258	0.977132	22.0928	0.0443875	0.23147	0.629399	0.915465	22.0928	0.0759395	0.268365	0.492098	0.876315
chr1	21329892	21330062	12.2186	-0.0864024	0.325518	0.469741	0.86678	12.2186	0.0522269	0.273859	0.578272	0.898054	12.2186	0.190104	0.420907	0.204081	0.655369
chr1	21334427	21334818	25.6124	0.033537	0.247263	0.764304	0.961524	25.6124	0.101059	0.255058	0.313665	0.766478	25.6124	0.0760268	0.256693	0.481311	0.870737
chr1	21334969	21335383	29.9037	-0.118219	0.270931	0.33056	0.786426	29.9037	-0.0652092	0.227268	0.490673	0.86388	29.9037	0.0290377	0.229622	0.771591	0.958984
chr1	2139699	2139930	3.44128	-0.157006	0.500678	0.196416	NA	3.44128	-0.102623	0.440877	0.326254	NA	3.44128	0.0413621	0.450878	0.729506	NA
chr1	214281200	214281677	27.8626	0.154464	0.296793	0.229218	0.698586	27.8626	0.113294	0.261331	0.2695	0.731716	27.8626	-0.0102943	0.222265	0.916378	0.986276
chr1	21439781	21439960	9.76032	0.0235735	0.318449	0.834558	0.976876	9.76032	0.0913839	0.333058	0.374977	0.806297	9.76032	0.0856465	0.352736	0.498633	0.879184
chr1	21440225	21440401	11.7347	0.18741	0.410054	0.185717	0.646812	11.7347	0.148542	0.377374	0.202777	0.669895	11.7347	-0.00647659	0.289955	0.954239	0.99318
chr1	214427465	214427799	16.7327	-0.541164	0.672542	0.0212888	0.207384	16.7327	0.242332	0.422025	0.0826694	0.470341	16.7327	1.88034	0.782944	0.000142329	0.00477692
chr1	214428465	214428610	7.48051	-0.0854772	0.377346	0.474343	0.869173	7.48051	0.126486	0.38821	0.260932	0.724353	7.48051	0.35396	0.61952	0.0723798	0.392628
chr1	214446630	214446938	12.706	-0.0406847	0.325786	0.721453	0.951459	12.706	1.01513	0.900428	0.00369472	0.0737556	12.706	1.33836	0.880075	0.00152536	0.0300108
chr1	214447284	214448308	40.9957	-0.121188	0.262716	0.318641	0.77701	40.9957	0.889709	0.576394	0.0017334	0.0444773	40.9957	1.52259	0.468845	5.03817e-05	0.00202696
chr1	214550621	214550894	18.8973	0.148148	0.333676	0.254372	0.722129	18.8973	0.0638633	0.261753	0.500587	0.867282	18.8973	-0.0521799	0.272477	0.636287	0.92867
chr1	214551009	214551763	77.7607	0.0981859	0.195056	0.403248	0.83576	77.7607	0.211934	0.222551	0.0661222	0.421744	77.7607	0.0925294	0.186457	0.319286	0.772994
chr1	214551960	214552501	64.2822	0.000608359	0.19454	0.995738	0.999149	64.2822	0.0341312	0.179269	0.724426	0.942009	64.2822	0.0296854	0.170906	0.729481	0.949406
chr1	214581653	214581836	7.44856	-0.011477	0.35872	0.918042	0.990785	7.44856	0.442639	0.726239	0.0290058	0.27462	7.44856	0.56566	0.772663	0.0243173	0.204421
chr1	214602578	214602927	23.2852	-0.0306394	0.259348	0.783889	0.965881	23.2852	0.237504	0.385824	0.0791529	0.461091	23.2852	0.409303	0.509463	0.0440386	0.293192
chr1	214603260	214604111	52.5972	0.0254768	0.211219	0.821663	0.973235	52.5972	0.764061	0.49081	0.00169929	0.0437118	52.5972	0.731408	0.449392	0.00371261	0.056832
chr1	215567149	215567394	9.80695	-0.0762294	0.332471	0.519271	0.889353	9.80695	-0.093053	0.331864	0.367307	0.801507	9.80695	-0.0302258	0.325822	0.799918	0.967033
chr1	215567481	215567904	27.1956	-0.0494689	0.240777	0.661594	0.934866	27.1956	-1.09587	0.708719	0.00159635	0.0418987	27.1956	-0.839416	0.635898	0.00627083	0.0817892
chr1	217630661	217631327	48.06	0.056062	0.213376	0.624123	0.924944	48.06	0.0341135	0.192371	0.718269	0.939558	48.06	-0.0117295	0.185131	0.895162	0.982792
chr1	21781965	21782224	15.1989	0.404006	0.546068	0.0408773	0.30917	15.1989	0.00880608	0.255754	0.922071	0.983624	15.1989	-0.410409	0.560047	0.0502714	0.317117
chr1	21782644	21783089	40.2854	-0.0101685	0.222177	0.927583	0.991831	40.2854	0.0467784	0.205292	0.618072	0.912065	40.2854	0.0576096	0.217694	0.55688	0.902817
chr1	21783277	21783712	64.0704	0.138683	0.215757	0.253456	0.721562	64.0704	0.122168	0.200017	0.236584	0.701261	64.0704	0.0029525	0.166296	0.972072	0.99631
chr1	21783801	21784419	20.9419	-0.0919768	0.275726	0.436247	0.851883	20.9419	-0.175273	0.33681	0.140397	0.587317	20.9419	-0.0783242	0.279262	0.488317	0.874251
chr1	218206981	218207360	9.36882	-0.0912904	0.34556	0.449899	0.858552	9.36882	-1.14094	1.16597	0.00136327	0.037527	9.36882	-0.749223	0.940259	0.00744166	0.0924492
chr1	218209108	218209530	19.1441	0.0566115	0.264289	0.618736	0.923945	19.1441	-1.9029	0.855843	0.000183391	0.00873826	19.1441	-2.13638	0.748529	3.5859e-05	0.00154573
chr1	218209612	218209817	7.9639	-0.0180566	0.321306	0.872661	0.984467	7.9639	-1.29477	1.29756	0.000234885	0.010545	7.9639	-1.21499	1.19345	0.000340201	0.00946439
chr1	218209934	218210129	9.72223	0.0495076	0.31242	0.665842	0.935891	9.72223	-0.5105	0.772902	0.0213166	0.228666	9.72223	-0.866298	0.89577	0.00751446	0.0931325
chr1	218211524	218211830	12.8466	0.17221	0.37704	0.208804	0.675905	12.8466	-0.687696	0.863096	0.0107937	0.149874	12.8466	-1.74245	0.942347	0.000339401	0.00945053
chr1	218211871	218212112	10.5481	0.251602	0.467904	0.112011	0.523411	10.5481	-0.303324	0.595824	0.0631526	0.413466	10.5481	-1.39306	0.981696	0.00121054	0.0253994
chr1	218284590	218285155	35.3753	0.0444527	0.230554	0.693772	0.942936	35.3753	-0.230488	0.342231	0.0755074	0.451704	35.3753	-0.441493	0.477233	0.0307816	0.235803
chr1	2189256	2189497	14.9027	0.175854	0.378292	0.201923	0.66886	14.9027	0.22575	0.432954	0.0995143	0.509096	14.9027	0.04138	0.278946	0.710133	0.945127
chr1	2189840	2190721	57.5626	-0.0713521	0.206751	0.537365	0.895573	57.5626	-0.120318	0.208123	0.242269	0.706824	57.5626	-0.0497432	0.188946	0.584152	0.91396
chr1	219174021	219174281	22.1948	-0.0849547	0.269944	0.467894	0.866288	22.1948	-0.0635166	0.240008	0.500379	0.867153	22.1948	0.00586122	0.241605	0.954439	0.99318
chr1	21931894	21932101	12.1615	0.191525	0.426015	0.180229	0.639824	12.1615	0.722877	0.823107	0.00961552	0.139873	12.1615	0.197241	0.420702	0.19119	0.638948
chr1	21934632	21934802	4.41524	-0.0863395	0.407501	0.460676	NA	4.41524	-0.10231	0.415505	0.337381	NA	4.41524	-0.0272086	0.409891	0.82567	NA
chr1	21935018	21935391	10.5817	-0.0536859	0.313054	0.640804	0.928505	10.5817	-0.0609584	0.295074	0.526387	0.878169	10.5817	-0.0191129	0.311809	0.870058	0.97956
chr1	2193511	2193731	8.13785	-0.23443	0.49205	0.126535	0.553522	8.13785	-0.121919	0.377808	0.2725	0.734516	8.13785	0.0574792	0.365205	0.646438	0.932111
chr1	21936020	21936534	26.0669	0.0465485	0.247401	0.679669	0.938911	26.0669	0.0650591	0.232175	0.491149	0.863999	26.0669	0.0272616	0.229857	0.785258	0.96264
chr1	21936687	21937020	21.054	0.165457	0.328675	0.212136	0.681221	21.054	0.128336	0.29555	0.230784	0.695675	21.054	-0.0057969	0.239334	0.954706	0.993224
chr1	21937598	21938153	26.194	0.109461	0.270554	0.362755	0.808508	26.194	-0.0314974	0.223061	0.729369	0.943332	26.194	-0.163166	0.324029	0.20941	0.661846
chr1	21938791	21939602	32.208	-0.376159	0.418004	0.0348131	0.281038	32.208	-1.52901	0.578777	0.000145119	0.007245	32.208	-0.288478	0.414756	0.0816536	0.419031
chr1	21940176	21940417	8.76155	-0.0942083	0.351883	0.437749	0.852289	8.76155	-0.332032	0.61142	0.0532518	0.381204	8.76155	-0.177545	0.458295	0.236862	0.694022
chr1	21942808	21943128	12.2626	-0.0674164	0.305496	0.562147	0.907067	12.2626	-0.109812	0.325971	0.299167	0.756353	12.2626	-0.0537607	0.311474	0.648674	0.932671
chr1	2194390	2194697	20.091	-0.0338389	0.265674	0.762561	0.961173	20.091	0.0813392	0.260819	0.403217	0.821215	20.091	0.148311	0.338082	0.257209	0.716235
chr1	21943976	21944146	2.86405	-0.135023	0.494485	0.229134	NA	2.86405	-0.139339	0.509196	0.192572	NA	2.86405	-0.0110344	0.468058	0.921446	NA
chr1	2194829	2195359	52.1895	0.0660875	0.209145	0.566351	0.908947	52.1895	0.045118	0.189202	0.637766	0.917618	52.1895	-0.00922822	0.178028	0.915766	0.985986
chr1	2195455	2195707	15.4214	0.0926244	0.301273	0.437778	0.852289	15.4214	-0.0649845	0.273418	0.496203	0.86509	15.4214	-0.228019	0.429125	0.147418	0.569442
chr1	2198961	2199195	14.7862	-0.111446	0.323126	0.365844	0.810857	14.7862	0.00531969	0.244623	0.95265	0.988235	14.7862	0.124918	0.345371	0.33487	0.784631
chr1	220046189	220046461	17.41	0.00629404	0.271986	0.95483	0.994384	17.41	0.193409	0.375175	0.123626	0.560541	17.41	0.230388	0.416382	0.139663	0.55478
chr1	220046759	220047192	34.508	-0.0237564	0.227706	0.831914	0.975993	34.508	-0.015847	0.205082	0.862739	0.973031	34.508	0.00384543	0.209027	0.967648	0.996024
chr1	220089437	220089757	23.8283	0.0337503	0.247055	0.762878	0.96119	23.8283	-0.115038	0.275295	0.266593	0.729787	23.8283	-0.20104	0.364782	0.15912	0.58988
chr1	220094170	220094789	51.1591	0.00260192	0.20647	0.981629	0.998977	51.1591	0.0715611	0.195999	0.462606	0.849808	51.1591	0.0669579	0.200865	0.478844	0.869683
chr1	22025529	22025863	34.9251	-0.0330297	0.233564	0.768274	0.962769	34.9251	0.101573	0.236083	0.309749	0.764293	34.9251	0.164983	0.305091	0.191833	0.639667
chr1	22026097	22026476	16.6558	-0.0322908	0.270811	0.77316	0.963361	16.6558	-0.0889013	0.281888	0.37151	0.804358	16.6558	-0.0694785	0.292812	0.546864	0.899447
chr1	220272008	220272394	28.7173	0.123216	0.272533	0.313639	0.773238	28.7173	0.128051	0.265706	0.224204	0.68997	28.7173	0.0197385	0.218965	0.839307	0.974959
chr1	2204328	2204755	15.6781	-0.318033	0.480845	0.0679171	0.40924	15.6781	-0.18967	0.380423	0.130065	0.571247	15.6781	0.0379701	0.287186	0.736607	0.951515
chr1	22052255	22052445	7.39347	-0.12353	0.396535	0.33034	0.786397	7.39347	-0.00936598	0.29339	0.919019	0.983218	7.39347	0.119509	0.409123	0.380818	0.812947
chr1	22052732	22053244	61.0584	0.116386	0.211388	0.329035	0.785988	61.0584	-0.0639682	0.188229	0.511878	0.872009	61.0584	-0.204133	0.274985	0.102959	0.475071
chr1	22053376	22053626	11.7221	0.0761128	0.317053	0.518222	0.888689	11.7221	-0.0420207	0.281111	0.65246	0.922075	11.7221	-0.15343	0.393131	0.274176	0.73432
chr1	2205427	2205821	17.6605	-0.111356	0.302766	0.362017	0.807754	17.6605	-0.16331	0.34475	0.16353	0.623693	17.6605	-0.0535639	0.280306	0.63259	0.927545
chr1	220747597	220748096	26.4851	0.103723	0.262657	0.384133	0.822824	26.4851	-0.0673733	0.234078	0.477254	0.858829	26.4851	-0.236929	0.376624	0.11514	0.503371
chr1	220748354	220748835	29.8121	0.162714	0.290486	0.208136	0.674985	29.8121	0.087272	0.235989	0.371888	0.804842	29.8121	-0.0366613	0.221025	0.708751	0.945127
chr1	2212735	2213582	52.4265	-0.147469	0.233785	0.231953	0.702126	52.4265	-0.0271741	0.186395	0.775342	0.952717	52.4265	0.0909473	0.215002	0.360266	0.800325
chr1	221439818	221440002	9.58325	0.0208639	0.333968	0.853246	0.980512	9.58325	0.573523	0.779483	0.016863	0.196574	9.58325	0.555791	0.719428	0.0273249	0.219924
chr1	221957633	221957976	11.2152	-0.0282658	0.331385	0.802853	0.969891	11.2152	0.921874	0.906704	0.00503027	0.0905651	11.2152	1.16353	0.898821	0.00285366	0.0474567
chr1	221958626	221958881	12.6773	0.161749	0.399073	0.232994	0.702712	12.6773	0.938669	0.892913	0.00472598	0.0867836	12.6773	0.315107	0.51535	0.087693	0.437225
chr1	221960651	221960850	8.00468	0.0414087	0.344844	0.716726	0.950151	8.00468	0.266487	0.54543	0.0807005	0.466126	8.00468	0.226635	0.492389	0.163765	0.597971
chr1	221961324	221961736	22.1045	0.0352381	0.273058	0.753609	0.959329	22.1045	1.2653	0.759912	0.00110065	0.0323707	22.1045	1.04417	0.686509	0.00309459	0.0500797
chr1	221962319	221962766	18.7654	-0.056858	0.294655	0.620265	0.924138	18.7654	0.907609	0.774006	0.00423055	0.0808027	18.7654	1.36822	0.742365	0.00102353	0.0222896
chr1	222465243	222465491	10.8545	-0.00642547	0.302699	0.954253	0.994268	10.8545	0.0286924	0.27503	0.754859	0.94901	10.8545	0.0435156	0.315676	0.712824	0.945481
chr1	222465611	222466330	64.1324	-0.0219217	0.195959	0.847539	0.979541	64.1324	0.0634022	0.183156	0.518102	0.875144	64.1324	0.077902	0.192016	0.402948	0.824982
chr1	222589480	222590298	46.8382	0.195329	0.266437	0.138488	0.575018	46.8382	0.165825	0.247213	0.134346	0.577284	46.8382	0.000680225	0.183692	0.993875	0.998461
chr1	222643613	222644123	42.4899	0.282868	0.32684	0.0610873	0.388289	42.4899	0.034288	0.200396	0.713391	0.939038	42.4899	-0.196977	0.302279	0.129661	0.534887
chr1	222644334	222644634	14.4039	0.0940889	0.313548	0.433555	0.850571	14.4039	-0.0508659	0.273663	0.58757	0.901405	14.4039	-0.199042	0.417035	0.186709	0.631932
chr1	222711633	222712287	53.0827	0.0905725	0.213949	0.438978	0.852391	53.0827	0.00868232	0.186657	0.926864	0.984283	53.0827	-0.063885	0.196659	0.493938	0.877388
chr1	222712555	222713234	83.7816	0.203413	0.221874	0.111832	0.523143	83.7816	0.205083	0.220006	0.072742	0.442308	83.7816	0.0160903	0.156173	0.844308	0.976108
chr1	222713452	222713630	14.6862	0.0124306	0.277224	0.911125	0.990224	14.6862	0.006269	0.247967	0.944275	0.986751	14.6862	-0.00463895	0.274196	0.966283	0.995814
chr1	2227320	2227650	30.3876	-0.0452519	0.239727	0.688074	0.94171	30.3876	0.10387	0.241346	0.301041	0.757696	30.3876	0.193892	0.332632	0.153038	0.579649
chr1	222815138	222815308	13.6159	0.158449	0.366012	0.23615	0.705969	13.6159	0.0806557	0.293392	0.414583	0.829138	13.6159	-0.0427683	0.287032	0.705097	0.944398
chr1	2229219	2230253	48.9054	-0.157783	0.243287	0.207516	0.674659	48.9054	-0.19372	0.261215	0.0951858	0.501431	48.9054	-0.0367386	0.194655	0.689013	0.941786
chr1	223230860	223231201	8.41848	-0.612171	0.819278	0.0108966	0.135209	8.41848	-0.0131396	0.283447	0.885984	0.977257	8.41848	0.647573	0.851145	0.0149009	0.148523
chr1	223233486	223233656	7.52666	-0.308665	0.606611	0.0627058	0.393987	7.52666	0.101205	0.356814	0.339767	0.783329	7.52666	0.775396	0.923858	0.00823904	0.0988616
chr1	223700098	223701376	77.4224	-0.161863	0.213066	0.189396	0.653184	77.4224	0.103799	0.182581	0.307499	0.762815	77.4224	0.384189	0.332694	0.0201733	0.181392
chr1	223701611	223701989	30.1228	-0.119029	0.271619	0.327842	0.785344	30.1228	0.13703	0.263792	0.199584	0.665889	30.1228	0.488043	0.504811	0.0251413	0.208996
chr1	223702179	223702503	16.9134	0.0203644	0.299381	0.856086	0.980708	16.9134	0.964988	0.85542	0.00412622	0.0793898	16.9134	0.890907	0.770702	0.00716407	0.0899623
chr1	223702728	223702954	12.532	-0.059647	0.303587	0.605149	0.920797	12.532	0.00254311	0.25558	0.977438	0.994379	12.532	0.0648692	0.312305	0.584859	0.914471
chr1	223704906	223705292	19.1957	-0.181381	0.356561	0.187042	0.649223	19.1957	0.0372173	0.236233	0.683285	0.932387	19.1957	0.304042	0.468528	0.0856223	0.431189
chr1	223705993	223706841	43.6933	-0.17012	0.262526	0.184429	0.645084	43.6933	0.00549373	0.192805	0.953077	0.988426	43.6933	0.171043	0.286126	0.165068	0.599952
chr1	223712190	223714068	141.112	-0.157166	0.171155	0.182074	0.641902	141.112	0.0430646	0.149581	0.665829	0.926496	141.112	0.185937	0.198063	0.0773757	0.407474
chr1	223714860	223715123	13.1879	-0.338227	0.527903	0.0621057	0.392096	13.1879	-0.0388923	0.259701	0.672156	0.928989	13.1879	0.240259	0.465905	0.142982	0.560654
chr1	223715648	223716223	19.9276	-1.60833	0.742562	0.000267828	0.00898923	19.9276	-0.0860535	0.257367	0.379535	0.808511	19.9276	1.04243	0.772277	0.00396629	0.0595726
chr1	223716599	223716907	6.73294	-0.297237	0.581894	0.0732339	0.424146	6.73294	-0.0549837	0.327438	0.571867	0.896565	6.73294	0.195845	0.506622	0.203771	0.65508
chr1	223764734	223765142	14.2604	-0.327014	0.51403	0.0663236	0.404654	14.2604	-0.107687	0.313959	0.303242	0.759219	14.2604	0.107194	0.348886	0.403086	0.825076
chr1	223766250	223766538	5.5001	-0.355137	0.699438	0.0228292	NA	5.5001	0.000224714	0.317851	0.998076	0.999807	5.5001	0.431488	0.785032	0.0226577	0.195351
chr1	223768974	223769379	16.4172	-0.534012	0.627939	0.0213049	0.207447	16.4172	-0.0573921	0.255059	0.540351	0.883892	16.4172	0.318404	0.507578	0.0843538	0.427117
chr1	223769468	223773073	254.642	-1.32636	0.180022	6.04187e-14	2.39608e-11	254.642	-0.0488811	0.127011	0.611456	0.909561	254.642	1.23526	0.182198	2.0077e-12	6.23798e-10
chr1	223773280	223773969	29.9922	-1.77217	0.61171	6.08012e-05	0.00271488	29.9922	-0.0831729	0.241251	0.391818	0.816075	29.9922	1.28187	0.691762	0.00119066	0.0252251
chr1	223774526	223776254	88.4089	-1.86066	0.304819	1.94768e-10	4.0803e-08	88.4089	-0.0745129	0.168744	0.457563	0.847537	88.4089	1.66783	0.313236	1.209e-08	1.50554e-06
chr1	223776357	223777663	72.9123	-2.01462	0.341677	5.11667e-10	9.76053e-08	72.9123	-0.0360492	0.172333	0.713012	0.939038	72.9123	1.92177	0.350323	3.63064e-09	5.22629e-07
chr1	223845265	223845924	76.3387	0.131453	0.20014	0.273065	0.73864	76.3387	-0.00685034	0.172501	0.943866	0.986751	76.3387	-0.114873	0.201119	0.242404	0.700771
chr1	223846138	223846829	92.0287	0.181523	0.202989	0.142675	0.582766	92.0287	0.175512	0.195297	0.107588	0.526853	92.0287	0.010781	0.14833	0.892649	0.982424
chr1	224114185	224114844	72.4917	0.0521121	0.19336	0.650661	0.931482	72.4917	0.180352	0.214632	0.103856	0.518471	72.4917	0.116155	0.205912	0.243006	0.701607
chr1	224182727	224183095	31.2899	0.308101	0.380566	0.0571824	0.374914	31.2899	0.0787353	0.230064	0.414427	0.829138	31.2899	-0.127731	0.274833	0.270578	0.731279
chr1	224183243	224184264	115.392	0.310926	0.228556	0.02371	0.222276	115.392	0.0591196	0.163225	0.554051	0.889549	115.392	-0.182515	0.213656	0.0928844	0.450078
chr1	224329962	224330384	42.3188	0.0470154	0.222367	0.678431	0.938697	42.3188	0.159816	0.254367	0.146971	0.598898	42.3188	0.110957	0.24353	0.302048	0.758193
chr1	224330476	224330653	16.7685	0.0442317	0.274973	0.695375	0.944023	16.7685	0.0237858	0.24337	0.792121	0.955057	16.7685	-0.0139546	0.262799	0.896616	0.98297
chr1	224356938	224357401	45.2419	-0.0123979	0.212523	0.912331	0.990224	45.2419	0.0927049	0.208493	0.349735	0.790724	45.2419	0.109834	0.235293	0.298144	0.754303
chr1	224433829	224434355	31.5092	-0.0114122	0.227678	0.918537	0.99089	31.5092	-0.0928367	0.233303	0.346435	0.788016	31.5092	-0.0897607	0.250122	0.402991	0.824989
chr1	224434887	224435531	48.0935	0.0353776	0.214631	0.754603	0.959462	48.0935	0.0437207	0.196877	0.643906	0.919994	48.0935	0.0133057	0.190078	0.882776	0.981207
chr1	224456699	224457259	39.0675	-0.260419	0.325021	0.0775417	0.437669	39.0675	-0.249214	0.327937	0.0580619	0.398198	39.0675	-0.01106	0.205576	0.906344	0.984322
chr1	224457339	224457579	16.7348	-0.0580188	0.278789	0.611736	0.922397	16.7348	-0.0764051	0.269931	0.430604	0.834845	16.7348	-0.030314	0.271511	0.781907	0.961754
chr1	224457812	224457982	5.7604	-0.10212	0.396233	0.402317	NA	5.7604	-0.0545658	0.3372	0.576036	0.896995	5.7604	0.0357658	0.378133	0.773732	0.959437
chr1	224458246	224458451	5.81472	-0.128439	0.41956	0.311321	NA	5.81472	-0.106122	0.391714	0.326042	0.776011	5.81472	0.00496877	0.377352	0.967825	0.996048
chr1	224497424	224499595	169.869	-0.717613	0.249732	3.91531e-05	0.0018791	169.869	-0.425244	0.22057	0.00140158	0.0382128	169.869	0.077668	0.143871	0.338571	0.786681
chr1	224499684	224500196	19.4948	-1.36663	0.808269	0.000839628	0.0219843	19.4948	-0.224593	0.411461	0.0962921	0.504296	19.4948	0.350728	0.544292	0.0719766	0.391387
chr1	224501963	224502538	30.5485	-0.541121	0.505988	0.0137006	0.157746	30.5485	-0.824284	0.624976	0.00324846	0.0677791	30.5485	-0.0484043	0.237969	0.63669	0.928826
chr1	224502626	224503685	67.2875	-0.290691	0.281894	0.0456902	0.329164	67.2875	-0.133284	0.203624	0.202544	0.669449	67.2875	0.0682714	0.191621	0.46021	0.858611
chr1	224503717	224504359	39.3645	-0.294406	0.340025	0.0567069	0.372811	39.3645	-0.142408	0.242198	0.182295	0.645513	39.3645	0.0577283	0.216787	0.555224	0.902447
chr1	224504598	224504878	8.75066	-0.523876	0.731003	0.0206432	0.203563	8.75066	-0.0820963	0.326137	0.416694	0.829555	8.75066	0.280819	0.563267	0.112965	0.498549
chr1	224505256	224505520	8.67094	-0.134249	0.387705	0.299661	0.759613	8.67094	-0.164586	0.424069	0.179596	0.643416	8.67094	-0.0369543	0.346107	0.762129	0.957121
chr1	224506245	224506546	12.6191	-0.108298	0.330812	0.378979	0.819466	12.6191	-0.127642	0.342173	0.246509	0.71074	12.6191	-0.0316649	0.30154	0.783781	0.961901
chr1	224506687	224506857	8.75312	-0.0547931	0.329748	0.635348	0.927678	8.75312	-0.0660524	0.316028	0.500891	0.867287	8.75312	-0.0234844	0.332999	0.844853	0.976199
chr1	224506939	224507192	9.95089	-0.151039	0.391361	0.256572	0.72441	9.95089	-0.0507788	0.289221	0.591709	0.902292	9.95089	0.0762885	0.347847	0.541892	0.897888
chr1	224509335	224510569	81.4055	-0.497463	0.33922	0.00574001	0.0873316	81.4055	-0.157773	0.198303	0.141697	0.589029	81.4055	0.138061	0.219711	0.187953	0.633869
chr1	224510673	224510913	18.9631	-0.263649	0.429356	0.0972387	0.491246	18.9631	0.00892451	0.232798	0.920637	0.983376	18.9631	0.322376	0.49017	0.0786382	0.41088
chr1	22451304	22451644	14.5975	-0.00451371	0.283147	0.967683	0.996582	14.5975	-0.0537329	0.273809	0.568058	0.895163	14.5975	-0.0621936	0.307243	0.597172	0.918868
chr1	224514386	224514575	8.93978	-0.20121	0.452497	0.166125	0.618928	8.93978	-0.0635073	0.309375	0.514417	0.873134	8.93978	0.0987932	0.381058	0.451468	0.85423
chr1	22452007	22452414	26.8599	0.134419	0.282336	0.280128	0.74466	26.8599	-0.131075	0.284375	0.220142	0.686999	26.8599	-0.535809	0.548001	0.0221042	0.192545
chr1	224539354	224539886	30.282	-2.2097	0.534626	1.23185e-06	9.77054e-05	30.282	-0.106481	0.240488	0.291029	0.750787	30.282	1.78911	0.60876	7.05055e-05	0.00268186
chr1	224539950	224542914	179.481	-2.69063	0.249179	1.36669e-28	5.88457e-25	179.481	-0.111816	0.146822	0.269103	0.731716	179.481	2.4944	0.252995	2.4516e-24	5.49526e-21
chr1	224543135	224544834	117.712	-2.61299	0.296794	5.66374e-20	6.09661e-17	117.712	-0.0824776	0.158828	0.414196	0.829138	117.712	2.45285	0.30267	2.13925e-17	1.72133e-14
chr1	224544993	224545209	10.8215	-0.946131	0.962723	0.00257935	0.0501235	10.8215	-0.0059224	0.26721	0.94784	0.987329	10.8215	1.063	1.01192	0.00298396	0.0487961
chr1	224559245	224559646	7.86263	-0.697668	0.868959	0.00702764	0.100719	7.86263	-0.107919	0.361513	0.31554	0.768146	7.86263	0.36872	0.669094	0.0604727	0.353915
chr1	224563963	224565241	88.6342	-1.18583	0.339792	1.50875e-05	0.00086288	88.6342	0.00269372	0.166107	0.978131	0.994642	88.6342	1.19924	0.318649	1.29328e-05	0.000684389
chr1	224565526	224566338	72.5229	-0.73897	0.40785	0.001284	0.030329	72.5229	0.0616529	0.175428	0.533093	0.881077	72.5229	1.06691	0.3586	0.000129501	0.00442207
chr1	224579804	224580281	23.1053	-1.56354	0.710138	0.000283595	0.00940326	23.1053	-0.00161144	0.217643	0.985726	0.996458	23.1053	1.61813	0.693009	0.000294575	0.00849637
chr1	224615712	224617082	60.3839	-0.957425	0.449847	0.000512405	0.0149505	60.3839	-0.0580064	0.183854	0.55225	0.889043	60.3839	0.720195	0.439062	0.00364377	0.0560926
chr1	224617313	224617753	17.3186	-0.828749	0.736732	0.00618958	0.0920665	17.3186	-0.0903293	0.272926	0.362754	0.799403	17.3186	0.383767	0.550522	0.0585319	0.346728
chr1	224623020	224623229	8.93522	-0.312439	0.560224	0.0721747	0.420844	8.93522	-0.0496251	0.298368	0.601787	0.904915	8.93522	0.205952	0.482724	0.190813	0.638837
chr1	224623599	224624033	12.6798	-0.880071	0.863991	0.00497236	0.079505	12.6798	-0.0308158	0.265448	0.736326	0.944489	12.6798	0.762551	0.828296	0.0116887	0.126092
chr1	224624206	224624624	13.4515	-0.977029	0.890827	0.00345537	0.0618438	13.4515	-0.028692	0.263891	0.7533	0.948601	13.4515	0.869466	0.865745	0.00785911	0.0958518
chr1	224624907	224625077	4.24965	-0.254509	0.577191	0.0845892	NA	4.24965	-0.146762	0.465958	0.210792	NA	4.24965	0.0692108	0.444292	0.58158	NA
chr1	224627136	224627347	4.52685	-0.0874924	0.417664	0.449814	NA	4.52685	-0.0134264	0.346064	0.886302	NA	4.52685	0.0793072	0.435489	0.537324	NA
chr1	224633267	224634166	44.1927	-0.161986	0.257103	0.201031	0.667828	44.1927	0.0673225	0.200222	0.485568	0.861956	44.1927	0.324021	0.376006	0.0489546	0.312499
chr1	224637282	224637427	6.85636	-0.0079165	0.350564	0.943597	0.992997	6.85636	0.195289	0.481005	0.138604	0.585037	6.85636	0.266761	0.548798	0.124199	0.523142
chr1	224644035	224644205	3.97827	-0.0830934	0.410887	0.472781	NA	3.97827	-0.0839137	0.399867	0.413654	NA	3.97827	-0.0116469	0.412014	0.924319	NA
chr1	224929762	224930066	31.3147	0.146323	0.275581	0.244706	0.714182	31.3147	0.0832719	0.229862	0.39138	0.815549	31.3147	-0.0302609	0.21492	0.753932	0.954787
chr1	225427511	225427995	35.2753	-0.0109048	0.226378	0.92219	0.991374	35.2753	0.094318	0.226313	0.340122	0.783403	35.2753	0.117301	0.261296	0.294994	0.752262
chr1	225428350	225428801	37.0934	0.069066	0.234493	0.547458	0.900135	37.0934	0.172136	0.275744	0.129761	0.571247	37.0934	0.096511	0.242499	0.363014	0.80246
chr1	225652379	225653020	50.4042	0.0376324	0.206904	0.740838	0.955599	50.4042	-0.0678159	0.196836	0.484152	0.861721	50.4042	-0.106097	0.226318	0.303994	0.760495
chr1	225653310	225654424	118.801	0.1458	0.178539	0.218897	0.688394	118.801	0.0863909	0.161319	0.393229	0.817131	118.801	-0.0298337	0.140422	0.70266	0.94367
chr1	225777894	225778424	50.6425	0.177448	0.247918	0.165349	0.617916	50.6425	0.0731311	0.198046	0.452748	0.844592	50.6425	-0.0598563	0.195736	0.519665	0.888129
chr1	225881890	225882333	31.2423	0.0563176	0.239642	0.620045	0.924135	31.2423	0.0617826	0.221176	0.512652	0.872284	31.2423	0.0150016	0.215074	0.876267	0.980134
chr1	225882526	225883452	68.6381	0.0810003	0.196602	0.48672	0.875746	68.6381	-0.0117128	0.176184	0.903572	0.980144	68.6381	-0.0747423	0.185384	0.413354	0.831808
chr1	225923810	225924276	46.9598	0.0356031	0.21396	0.753201	0.959232	46.9598	0.099399	0.211862	0.319908	0.771997	46.9598	0.0647595	0.206529	0.498904	0.879184
chr1	225924547	225924880	22.8095	0.0790079	0.268832	0.496827	0.879893	22.8095	0.134437	0.291005	0.212836	0.680654	22.8095	0.0599524	0.253358	0.57325	0.909508
chr1	225998991	225999268	18.1814	0.0536817	0.271402	0.636722	0.927753	18.1814	0.0237067	0.237875	0.79266	0.955262	18.1814	-0.0224446	0.256485	0.832479	0.974468
chr1	225999620	226000052	45.7263	0.0596935	0.219096	0.601866	0.919725	45.7263	0.0314794	0.196107	0.737141	0.944828	45.7263	-0.0170997	0.191855	0.850487	0.977339
chr1	226061552	226062539	91.3166	0.110575	0.18967	0.348608	0.799207	91.3166	0.144332	0.186869	0.171577	0.635671	91.3166	0.0347793	0.15503	0.67172	0.939133
chr1	226062804	226063871	103.737	0.142506	0.185745	0.232529	0.702511	103.737	0.0937252	0.168023	0.355713	0.79464	103.737	-0.0219043	0.144703	0.78187	0.961754
chr1	226064021	226064209	12.5366	0.23153	0.431087	0.128404	0.557146	12.5366	-0.0681974	0.29863	0.483746	0.861664	12.5366	-0.544604	0.668123	0.0283159	0.224901
chr1	226082917	226083493	57.0271	0.273373	0.285203	0.0575535	0.375875	57.0271	0.0307767	0.187059	0.746668	0.947626	57.0271	-0.197046	0.27558	0.113059	0.498724
chr1	226083634	226084095	34.5984	0.0812372	0.238435	0.483747	0.874723	34.5984	0.0357173	0.207454	0.699676	0.936732	34.5984	-0.0303292	0.210037	0.750454	0.954401
chr1	226110106	226110941	74.9865	0.0555861	0.189965	0.629718	0.926436	74.9865	0.0331923	0.17374	0.734019	0.944115	74.9865	-0.0119643	0.15922	0.884888	0.981746
chr1	226121657	226122102	29.0929	-0.0709312	0.250119	0.53728	0.895573	29.0929	-0.0395911	0.218598	0.666921	0.926949	29.0929	0.0188442	0.22655	0.849257	0.977066
chr1	226122250	226122614	26.7284	0.00968246	0.240846	0.930518	0.991964	26.7284	0.0597486	0.22786	0.524468	0.87747	26.7284	0.0566474	0.241683	0.584654	0.914289
chr1	226186221	226186685	44.9481	0.0992523	0.224958	0.399655	0.834072	44.9481	0.00463043	0.192342	0.960477	0.990689	44.9481	-0.078186	0.213965	0.426326	0.839464
chr1	226186822	226187270	30.7315	-0.0234241	0.233593	0.833838	0.976809	30.7315	0.0835581	0.228162	0.390073	0.815422	30.7315	0.123	0.275084	0.287048	0.744574
chr1	226308756	226309082	25.4118	0.0878809	0.267859	0.453836	0.860397	25.4118	0.208513	0.348297	0.0984652	0.507289	25.4118	0.102776	0.275725	0.366989	0.804987
chr1	226309393	226309782	36.2922	-0.011966	0.224512	0.914741	0.990378	36.2922	0.156552	0.260112	0.154586	0.611195	36.2922	0.205758	0.321075	0.127602	0.53088
chr1	226407643	226408078	33.2709	-0.0797221	0.238391	0.491344	0.878403	33.2709	-0.0582039	0.212742	0.537533	0.882558	33.2709	0.00724204	0.209109	0.939135	0.991135
chr1	226408467	226408641	10.8656	-0.0894157	0.337983	0.457526	0.86181	10.8656	-0.00922461	0.269487	0.919005	0.983218	10.8656	0.0803297	0.343073	0.519694	0.888129
chr1	226703135	226703538	34.6755	0.242193	0.329668	0.0955798	0.487377	34.6755	0.0979046	0.234697	0.324665	0.775604	34.6755	-0.0703926	0.229347	0.487584	0.873771
chr1	226827885	226828101	7.98225	-0.218138	0.479972	0.143571	0.584288	7.98225	-0.0415486	0.299738	0.659741	0.924399	7.98225	0.149457	0.434515	0.296618	0.753339
chr1	226870877	226871022	7.89098	-0.0508676	0.341167	0.658683	0.93452	7.89098	0.0463777	0.30517	0.625978	0.914307	7.89098	0.126808	0.405226	0.355842	0.798721
chr1	226938065	226938325	7.90492	0.00572284	0.350172	0.959202	0.995536	7.90492	0.378472	0.66568	0.0406949	0.329645	7.90492	0.433404	0.676175	0.0471102	0.305447
chr1	226938466	226940006	156.11	-0.0557497	0.159864	0.623045	0.92472	156.11	0.319835	0.200907	0.0084642	0.12721	156.11	0.512436	0.256906	0.00187746	0.0349032
chr1	227317779	227318429	47.2512	-0.0371996	0.213155	0.742792	0.956409	47.2512	0.160104	0.238085	0.143274	0.592229	47.2512	0.256832	0.328228	0.0746313	0.399461
chr1	227318594	227319050	32.7139	0.167206	0.28894	0.197791	0.6634	32.7139	0.215544	0.324628	0.085379	0.477439	32.7139	0.0417108	0.216925	0.668167	0.938197
chr1	227542351	227542549	9.72578	-0.015591	0.312424	0.889716	0.98746	9.72578	0.00243717	0.278623	0.978669	0.994869	9.72578	0.0195404	0.320736	0.868719	0.97953
chr1	227563598	227563754	17.6054	0.0178815	0.27614	0.87258	0.984467	17.6054	0.265613	0.448984	0.0706205	0.435743	17.6054	0.281055	0.459026	0.100643	0.470472
chr1	227563824	227564142	26.0817	0.0100866	0.242162	0.927611	0.991831	26.0817	0.0190622	0.218386	0.833168	0.966161	26.0817	0.011836	0.228825	0.905426	0.984225
chr1	227728741	227729029	14.9874	0.0501864	0.285338	0.659181	0.93452	14.9874	0.0463344	0.258833	0.61679	0.911785	14.9874	0.00616309	0.270328	0.954888	0.993272
chr1	227734794	227735270	49.0502	-0.0108073	0.207199	0.923809	0.991695	49.0502	0.039279	0.190405	0.679966	0.931488	49.0502	0.0463834	0.192378	0.612494	0.922608
chr1	227735488	227735781	29.0714	-0.0963174	0.25572	0.414392	0.84199	29.0714	-0.0124939	0.209345	0.89083	0.977683	29.0714	0.0715427	0.244324	0.495322	0.878008
chr1	228082137	228082480	34.6944	-0.04265	0.22828	0.705515	0.946844	34.6944	0.0288648	0.20365	0.755091	0.949125	34.6944	0.0697042	0.228559	0.490912	0.875675
chr1	228082719	228083854	120.483	0.0543839	0.167907	0.634722	0.927678	120.483	-0.0805682	0.160351	0.424706	0.83315	120.483	-0.117981	0.176797	0.203592	0.654804
chr1	228085439	228085679	4.83677	-0.192691	0.520381	0.148061	NA	4.83677	-0.022429	0.344741	0.812191	0.959864	4.83677	0.178268	0.52827	0.218844	0.673828
chr1	228093236	228093414	3.82816	-0.0951558	0.424605	0.414852	NA	3.82816	-0.0825831	0.401878	0.419124	NA	3.82816	0.00185332	0.416395	0.987886	NA
chr1	228103073	228103300	19.7134	0.140803	0.319742	0.270721	0.736833	19.7134	-0.0122969	0.23842	0.89091	0.977683	19.7134	-0.171059	0.360747	0.214638	0.668035
chr1	228103570	228103740	12.0737	-0.0104412	0.295128	0.925632	0.991831	12.0737	0.0358414	0.269934	0.697275	0.935853	12.0737	0.0568149	0.31241	0.631088	0.926697
chr1	228109073	228109273	12.8476	0.0789806	0.309868	0.502942	0.881523	12.8476	-0.0285915	0.265986	0.754394	0.948843	12.8476	-0.130129	0.361264	0.326744	0.778771
chr1	228109486	228109865	26.5377	0.0394115	0.240583	0.725625	0.951885	26.5377	-0.085613	0.243021	0.380028	0.808658	26.5377	-0.156146	0.315537	0.220564	0.675693
chr1	228139640	228139828	18.6825	-0.0117766	0.26265	0.915527	0.990378	18.6825	0.0515545	0.245273	0.578474	0.89806	18.6825	0.0747195	0.28145	0.509515	0.884766
chr1	228140331	228140807	37.9717	0.410955	0.411687	0.0245942	0.22648	37.9717	0.100465	0.228184	0.314128	0.767108	37.9717	-0.148646	0.273606	0.207329	0.659488
chr1	228165210	228165409	16.8062	0.0390361	0.280008	0.729116	0.952386	16.8062	0.0355233	0.252545	0.697329	0.935886	16.8062	0.00441416	0.269198	0.967609	0.996024
chr1	228165731	228166025	44.8029	0.0466524	0.215117	0.681685	0.939375	44.8029	0.00786192	0.192981	0.932891	0.985252	44.8029	-0.0298867	0.193384	0.743453	0.95352
chr1	228166291	228166536	23.1746	0.234802	0.365732	0.112339	0.523942	23.1746	0.0213191	0.227073	0.813144	0.960052	23.1746	-0.187956	0.350595	0.174191	0.614742
chr1	22829270	22829461	9.42801	-0.257348	0.526382	0.104154	0.50608	9.42801	0.15762	0.398018	0.188274	0.653806	9.42801	0.95868	0.924449	0.00537624	0.0741591
chr1	22829644	22829814	7.5307	-0.161943	0.439762	0.229765	0.699442	7.5307	0.034864	0.302214	0.710525	0.938988	7.5307	0.272127	0.554049	0.119789	0.512907
chr1	22831830	22832079	12.4177	-0.486018	0.653653	0.027659	0.243186	12.4177	-0.0052624	0.25488	0.953332	0.988426	12.4177	0.524866	0.683806	0.0313924	0.238876
chr1	22832401	22833013	15.0182	-0.238391	0.451753	0.123293	0.547169	15.0182	0.195164	0.391915	0.125365	0.563545	15.0182	1.13707	0.824939	0.00301763	0.0491929
chr1	228406121	228406801	54.6463	-0.0342715	0.204664	0.763285	0.961298	54.6463	0.0808872	0.19422	0.412042	0.827724	54.6463	0.116386	0.22617	0.263618	0.723297
chr1	228407167	228407461	20.4551	-0.0307275	0.257022	0.783248	0.965771	20.4551	-0.0452449	0.237802	0.622935	0.913839	20.4551	-0.0224222	0.250286	0.830455	0.974049
chr1	228456865	228457872	90.8974	0.0527827	0.179823	0.646753	0.930228	90.8974	-0.0442816	0.167268	0.654604	0.922662	90.8974	-0.0801988	0.172401	0.365579	0.804417
chr1	228458304	228458648	33.3929	0.0956817	0.246668	0.416325	0.842856	33.3929	-0.0862411	0.232352	0.376821	0.806805	33.3929	-0.259921	0.374899	0.0908909	0.44572
chr1	228486270	228487678	116.422	0.213847	0.199993	0.0884787	0.468591	116.422	0.13598	0.174715	0.193075	0.659007	116.422	-0.0326612	0.14534	0.681303	0.941054
chr1	228632925	228633183	14.0244	-0.143229	0.353195	0.271405	0.737233	14.0244	0.00429386	0.24722	0.961795	0.991021	14.0244	0.160793	0.382704	0.250657	0.710907
chr1	228635280	228635510	8.75597	-0.0867044	0.352275	0.470536	0.867132	8.75597	-0.0369019	0.294631	0.693593	0.934589	8.75597	0.0404803	0.340411	0.739239	0.952186
chr1	228646637	228648140	114.473	0.0218314	0.169694	0.848402	0.979905	114.473	0.0253541	0.157838	0.798506	0.956304	114.473	0.00486043	0.139369	0.95	0.992835
chr1	228648156	228648461	23.1189	0.0494787	0.256676	0.66149	0.934866	23.1189	0.0293172	0.227741	0.746511	0.947626	23.1189	-0.0119029	0.238118	0.906929	0.984377
chr1	229341777	229342427	37.9257	0.0425193	0.223606	0.706858	0.947044	37.9257	0.0449947	0.204173	0.631357	0.915715	37.9257	0.00934734	0.199228	0.919461	0.98698
chr1	229342788	229343018	19.5197	-0.0144532	0.26103	0.896467	0.988657	19.5197	0.0254399	0.234873	0.778156	0.952832	19.5197	0.0443851	0.262864	0.681095	0.941054
chr1	229507664	229508299	42.7716	0.0666945	0.22065	0.561617	0.906747	42.7716	0.0578831	0.200931	0.544153	0.885596	42.7716	0.00202971	0.189746	0.982026	0.997292
chr1	229508521	229508944	32.933	0.268958	0.357178	0.0782656	0.43977	32.933	0.224345	0.335419	0.0794268	0.461915	32.933	-0.00149508	0.208184	0.987391	0.998277
chr1	229558087	229558232	7.06194	-0.0788107	0.368913	0.506328	0.883349	7.06194	0.0251789	0.304474	0.787438	0.954271	7.06194	0.129007	0.422176	0.352259	0.796244
chr1	229558264	229558921	45.485	0.0132163	0.212529	0.906581	0.989869	45.485	-0.0694485	0.20463	0.471218	0.855044	45.485	-0.084155	0.222899	0.403533	0.825457
chr1	229625914	229626095	20.547	0.00244532	0.253932	0.982397	0.999149	20.547	-0.00802488	0.228193	0.928667	0.984358	20.547	-0.0115391	0.245978	0.911335	0.985141
chr1	229626294	229626580	20.9884	0.218204	0.369293	0.132984	0.565254	20.9884	0.157776	0.323482	0.168258	0.631031	20.9884	-0.0136928	0.239667	0.893402	0.982424
chr1	2300114	2300284	5.7691	-0.113699	0.406682	0.359144	NA	5.7691	-0.0831216	0.365855	0.419235	0.830798	5.7691	0.0147093	0.37691	0.905084	0.984225
chr1	23018942	23019220	15.1796	0.121689	0.327352	0.33076	0.78658	15.1796	0.068703	0.275077	0.474614	0.857335	15.1796	-0.0289968	0.273987	0.792069	0.965129
chr1	23019520	23019978	35.6621	0.0871424	0.246577	0.455304	0.861121	35.6621	0.157082	0.274936	0.156857	0.614471	35.6621	0.0676627	0.231034	0.505674	0.882419
chr1	230642538	230642808	23.5773	0.0941201	0.270833	0.425979	0.847718	23.5773	0.0316923	0.22644	0.727417	0.942726	23.5773	-0.047021	0.244822	0.651246	0.93327
chr1	230979103	230979343	11.2397	-0.074028	0.32132	0.529302	0.893237	11.2397	-0.105894	0.33506	0.316216	0.768761	11.2397	-0.0440625	0.320273	0.711144	0.945225
chr1	2311380	2311604	16.8872	-0.0093229	0.271131	0.933151	0.991964	16.8872	-0.106489	0.304184	0.304731	0.76052	16.8872	-0.119924	0.337377	0.347415	0.792834
chr1	2311733	2312132	22.9488	-0.0224219	0.249058	0.840332	0.978442	22.9488	-0.0972382	0.263511	0.330704	0.777987	22.9488	-0.0870522	0.278045	0.442294	0.849281
chr1	2312347	2312538	11.8235	-0.0938045	0.334227	0.437916	0.852289	11.8235	-0.0507102	0.282925	0.590713	0.902292	11.8235	0.0284879	0.310426	0.807362	0.968605
chr1	231240736	231241107	24.7003	-0.244128	0.374083	0.104431	0.506772	24.7003	-0.0175893	0.218241	0.845788	0.968992	24.7003	0.207961	0.370133	0.150843	0.575412
chr1	231241293	231241845	34.6811	-0.114974	0.250242	0.338774	0.793471	34.6811	-0.0511936	0.208492	0.585845	0.900281	34.6811	0.0404787	0.21555	0.676264	0.940226
chr1	2312738	2316861	311.989	-0.0434722	0.129648	0.677536	0.938341	311.989	0.031186	0.122804	0.742413	0.946547	311.989	0.0516759	0.110952	0.456827	0.856578
chr1	231337948	231338685	81.1877	0.057635	0.18658	0.617476	0.923792	81.1877	0.0522444	0.172287	0.596758	0.903207	81.1877	0.00215755	0.154548	0.978857	0.997089
chr1	231395041	231395752	38.9776	-0.115318	0.242528	0.336465	0.791106	38.9776	-0.191345	0.284642	0.103616	0.517893	38.9776	-0.0660833	0.224044	0.508505	0.884538
chr1	231395955	231396316	13.8932	-0.066367	0.296562	0.566694	0.908968	13.8932	-0.114636	0.320993	0.280859	0.74192	13.8932	-0.0587884	0.304029	0.615101	0.923
chr1	231420136	231420326	8.44909	-0.0903883	0.355417	0.45425	0.860589	8.44909	-0.20217	0.476537	0.130577	0.571522	8.44909	-0.102476	0.392699	0.439788	0.847778
chr1	231421233	231422316	105.706	0.127765	0.182825	0.280176	0.74466	105.706	-0.0287355	0.162676	0.771627	0.952693	105.706	-0.135509	0.194458	0.170053	0.60835
chr1	231422419	231422996	57.9165	0.131628	0.220856	0.276721	0.741854	57.9165	0.187981	0.238066	0.0976746	0.505972	57.9165	0.050252	0.182379	0.573743	0.909759
chr1	231528365	231528559	24.1264	0.0532744	0.256416	0.638279	0.927866	24.1264	0.164325	0.311534	0.152426	0.608298	24.1264	0.112079	0.286385	0.337931	0.786519
chr1	231528726	231528991	26.5085	0.0483863	0.253091	0.668183	0.936344	26.5085	-0.00336838	0.222372	0.970076	0.993238	26.5085	-0.0489605	0.248027	0.640428	0.930106
chr1	232805472	232805885	17.7195	-0.105586	0.306567	0.384832	0.823035	17.7195	-0.038865	0.246597	0.670923	0.928438	17.7195	0.0503123	0.280683	0.653252	0.934283
chr1	232950712	232951015	15.0523	0.016508	0.274745	0.882207	0.986259	15.0523	-0.0022541	0.245715	0.979926	0.995405	15.0523	-0.0190222	0.273123	0.862265	0.978431
chr1	23342811	23344272	130.443	0.559723	0.273977	0.000884411	0.0228612	130.443	0.118143	0.163047	0.250744	0.714803	130.443	-0.276943	0.234707	0.0279118	0.222932
chr1	23344696	23345699	85.0804	-0.0315261	0.18339	0.783442	0.965804	85.0804	0.0702403	0.171939	0.48158	0.860592	85.0804	0.0891099	0.181089	0.329437	0.781512
chr1	23367725	23368268	34.2396	0.223216	0.325198	0.115584	0.531944	34.2396	0.104328	0.243298	0.299438	0.756691	34.2396	-0.0544527	0.22563	0.585345	0.914521
chr1	23368495	23368905	44.4939	0.108329	0.230222	0.362096	0.807754	44.4939	0.0663	0.202098	0.490895	0.863897	44.4939	-0.0205135	0.189668	0.820156	0.971298
chr1	23368993	23369484	32.0365	0.100662	0.250707	0.395269	0.830781	32.0365	0.0331022	0.2108	0.7191	0.93994	32.0365	-0.0489138	0.222642	0.620878	0.924355
chr1	234372988	234373332	31.9386	0.117276	0.262621	0.332381	0.787552	31.9386	0.0828986	0.231185	0.393166	0.817131	31.9386	-0.0115747	0.213251	0.903909	0.983994
chr1	234373458	234374086	64.0188	-0.0624133	0.201152	0.588316	0.915669	64.0188	0.0716453	0.185522	0.46713	0.852863	64.0188	0.134723	0.228725	0.205983	0.657863
chr1	234478331	234478776	39.628	0.199232	0.286418	0.138007	0.574682	39.628	0.0391444	0.204326	0.674587	0.929575	39.628	-0.118155	0.252933	0.283852	0.742235
chr1	234478932	234479176	20.9932	-0.00414503	0.254773	0.970169	0.997037	20.9932	0.0414283	0.234496	0.651202	0.922075	20.9932	0.0523427	0.258799	0.625885	0.925565
chr1	234494109	234494398	10.252	-0.176073	0.415257	0.205665	0.673324	10.252	-0.0187036	0.271384	0.837393	0.966967	10.252	0.151479	0.409557	0.28552	0.743542
chr1	234494521	234495594	84.1921	-0.456904	0.316248	0.00725024	0.10283	84.1921	-0.0857906	0.174355	0.39409	0.817171	84.1921	0.237654	0.268161	0.0641108	0.365689
chr1	234495781	234496355	42.4769	-0.440599	0.418168	0.0194056	0.195679	42.4769	-0.127095	0.230638	0.221672	0.687925	42.4769	0.129636	0.263522	0.254132	0.713273
chr1	234498979	234499149	10.6321	-0.130688	0.367577	0.308825	0.768442	10.6321	-0.221211	0.47039	0.109981	0.531943	10.6321	-0.0729942	0.348353	0.558788	0.903982
chr1	234499304	234500700	131.881	-0.423126	0.24341	0.00441695	0.0734695	131.881	-0.176862	0.169965	0.0981727	0.506703	131.881	0.10977	0.169804	0.224291	0.67974
chr1	234500795	234501195	22.1173	-0.191458	0.343907	0.16624	0.618958	22.1173	-0.0612848	0.239159	0.514206	0.873134	22.1173	0.0845421	0.280936	0.457367	0.856813
chr1	234510072	234510275	11.2466	-0.107196	0.338402	0.384346	0.822824	11.2466	-0.123482	0.346839	0.260162	0.723513	11.2466	-0.0293508	0.309858	0.801531	0.967349
chr1	234512798	234513004	5.85902	-0.0802828	0.378108	0.497902	NA	5.85902	-0.118114	0.407934	0.287104	0.747499	5.85902	-0.048682	0.387445	0.698569	0.943283
chr1	234513106	234515842	156.803	-1.68601	0.225464	2.06358e-14	9.14649e-12	156.803	-0.323512	0.1969	0.00740436	0.117589	156.803	1.12341	0.238394	2.97522e-07	2.77049e-05
chr1	234516073	234516745	30.2709	-1.39415	0.606108	0.000311933	0.0101116	30.2709	-0.0431674	0.21055	0.642346	0.919283	30.2709	1.15185	0.62024	0.00144928	0.0289836
chr1	234523415	234523585	6.346	-0.0838289	0.379176	0.481409	NA	6.346	0.0205533	0.308559	0.825704	0.963457	6.346	0.127457	0.428924	0.357684	0.79901
chr1	234564115	234564386	12.0741	-0.323031	0.546005	0.0687529	0.411398	12.0741	0.064075	0.284506	0.504434	0.869153	12.0741	0.705621	0.777459	0.0148513	0.148239
chr1	234599357	234600113	66.4657	-0.0715304	0.197781	0.537134	0.895521	66.4657	0.00972453	0.17603	0.919881	0.983298	66.4657	0.0648051	0.18292	0.472393	0.865947
chr1	234600249	234601143	64.4671	-0.68202	0.43658	0.00281411	0.0533778	64.4671	-0.0676533	0.187071	0.489959	0.863683	64.4671	0.43067	0.390263	0.0204507	0.183048
chr1	234602995	234604314	75.0999	-1.2008	0.369671	3.11672e-05	0.00156825	75.0999	-0.191393	0.218526	0.0889418	0.485913	75.0999	0.491905	0.383798	0.0116552	0.125845
chr1	234604467	234605112	32.2368	-0.205092	0.31429	0.136949	0.572819	32.2368	-0.107872	0.242415	0.286024	0.746115	32.2368	0.0432779	0.228118	0.665209	0.937314
chr1	234605497	234606830	77.1526	-0.26271	0.249869	0.0559793	0.36938	77.1526	-0.241571	0.243584	0.0461386	0.352113	77.1526	-0.00582277	0.163433	0.944496	0.991698
chr1	234606959	234609593	254.894	-0.107759	0.140421	0.322487	0.781244	254.894	-0.0881565	0.132814	0.368735	0.802544	254.894	0.00660899	0.110677	0.923449	0.987789
chr1	234610321	234614115	360.331	-0.108977	0.123458	0.284629	0.747743	360.331	0.137264	0.1186	0.143827	0.593014	360.331	0.251016	0.151051	0.0115385	0.124945
chr1	234655284	234655601	22.0756	-0.0827944	0.280913	0.479808	0.871746	22.0756	0.042387	0.236359	0.643992	0.920013	22.0756	0.153857	0.340884	0.24407	0.703198
chr1	234655783	234657242	123.017	-0.179384	0.184194	0.138199	0.574715	123.017	0.104484	0.160092	0.305838	0.761525	123.017	0.370571	0.270388	0.0124303	0.131442
chr1	234657476	234658827	95.8556	-0.364719	0.2616	0.0142815	0.161305	95.8556	-0.116064	0.172972	0.259548	0.723282	95.8556	0.134108	0.20053	0.180079	0.623574
chr1	234658958	234659346	17.8508	-0.336306	0.484683	0.0594184	0.382747	17.8508	-0.0447137	0.243034	0.626932	0.914463	17.8508	0.217398	0.413265	0.156215	0.584815
chr1	234718471	234719027	32.9077	0.15709	0.288067	0.220582	0.690118	32.9077	0.638798	0.571589	0.00667974	0.109245	32.9077	0.205167	0.330806	0.133988	0.543382
chr1	234719581	234719971	23.3085	0.420304	0.515136	0.0341343	0.277981	23.3085	0.848608	0.720162	0.00450898	0.0839243	23.3085	0.0818527	0.265359	0.457717	0.856813
chr1	234720967	234723747	226.738	-0.806011	0.224032	2.93369e-06	0.00020606	226.738	-0.0461417	0.134275	0.637601	0.917609	226.738	0.734663	0.210639	2.40888e-05	0.00112156
chr1	234723807	234724108	26.0248	-0.0644044	0.25525	0.573321	0.911084	26.0248	0.0624316	0.229991	0.507388	0.870417	26.0248	0.156836	0.319996	0.222028	0.677121
chr1	234724377	234725323	75.5928	-0.0649128	0.192387	0.574605	0.911128	75.5928	0.089283	0.180463	0.374496	0.80626	75.5928	0.157814	0.229011	0.148315	0.570823
chr1	234725691	234725899	8.02252	-0.176403	0.460165	0.199949	0.666348	8.02252	0.134604	0.389971	0.239183	0.70358	8.02252	0.625836	0.80723	0.0186063	0.171781
chr1	234771824	234772837	54.0043	-0.139994	0.231889	0.252832	0.721257	54.0043	0.146396	0.218633	0.169657	0.63335	54.0043	0.515342	0.415967	0.0124252	0.131442
chr1	234955289	234955607	16.558	-0.0161639	0.279423	0.884768	0.986736	16.558	0.272812	0.457811	0.0675285	0.426379	16.558	0.405964	0.549134	0.0504804	0.317778
chr1	234957066	234957356	16.9108	0.0586181	0.291632	0.609685	0.922208	16.9108	0.190185	0.386429	0.130819	0.571695	16.9108	0.129134	0.339365	0.316655	0.7706
chr1	234957610	234959854	157.393	-0.445847	0.235776	0.00256691	0.0500432	157.393	0.219533	0.167391	0.0438775	0.345066	157.393	1.02327	0.225055	5.94463e-07	5.11092e-05
chr1	234960270	234960488	10.128	0.0130777	0.31865	0.907425	0.989909	10.128	0.101011	0.344227	0.337539	0.782162	10.128	0.110967	0.375532	0.401314	0.823987
chr1	234960676	234961612	46.9006	-0.222363	0.281478	0.104566	0.506942	46.9006	0.013848	0.188748	0.883235	0.977257	46.9006	0.256838	0.332754	0.0764997	0.404966
chr1	234961622	234963306	138.884	-0.199376	0.178478	0.0988252	0.494865	138.884	-0.0158534	0.149201	0.873255	0.975455	138.884	0.144206	0.180924	0.13467	0.54481
chr1	234963413	234964548	102.944	-0.145489	0.190947	0.225729	0.696038	102.944	0.0265048	0.162929	0.788769	0.954511	102.944	0.154325	0.209363	0.138953	0.553734
chr1	234970481	234971322	45.5256	0.16726	0.264153	0.191023	0.654379	45.5256	1.30305	0.479476	0.000116836	0.00608031	45.5256	0.576321	0.448544	0.0100772	0.114125
chr1	234971410	234971564	9.87306	0.0380669	0.325582	0.738216	0.95501	9.87306	0.191487	0.443487	0.140514	0.587317	9.87306	0.165733	0.420181	0.254075	0.713273
chr1	234978345	234978704	15.009	-0.0959757	0.322579	0.426978	0.847718	15.009	0.23535	0.4294	0.0900071	0.488056	15.009	0.694917	0.704751	0.014746	0.147512
chr1	234978987	234979967	42.201	-0.295753	0.342725	0.0564837	0.37187	42.201	0.00270847	0.193955	0.976798	0.994225	42.201	0.323337	0.387713	0.052467	0.325318
chr1	234980118	234980462	20.851	-0.0701561	0.274948	0.54341	0.897929	20.851	0.0204904	0.230911	0.820005	0.962241	20.851	0.0983419	0.296447	0.404373	0.826148
chr1	234980592	234981748	81.7905	-1.12172	0.402825	9.91877e-05	0.00394395	81.7905	0.0056389	0.175094	0.953554	0.988426	81.7905	1.16682	0.368456	7.70348e-05	0.00289513
chr1	234984042	234985724	72.0069	-1.86349	0.32228	1.31723e-09	2.25575e-07	72.0069	-0.767316	0.406799	0.000628802	0.021542	72.0069	0.665209	0.420369	0.00441502	0.064381
chr1	234987029	234987385	13.0681	-0.108245	0.331719	0.379329	0.819699	13.0681	-0.0504524	0.271037	0.589879	0.902292	13.0681	0.0400925	0.300987	0.72865	0.949345
chr1	235083077	235083778	41.6177	0.0142182	0.216483	0.899289	0.988799	41.6177	0.089658	0.212584	0.362918	0.799485	41.6177	0.0776413	0.219723	0.435618	0.845211
chr1	235084115	235084323	10.0269	-0.0556239	0.32606	0.63033	0.926436	10.0269	0.0890663	0.320018	0.381783	0.810018	10.0269	0.210967	0.458598	0.180049	0.623574
chr1	235104462	235104632	9.51781	-0.117008	0.371082	0.352261	0.801532	9.51781	0.010766	0.276269	0.905971	0.980282	9.51781	0.148266	0.411417	0.294587	0.752009
chr1	235128231	235128833	57.3503	0.128688	0.222363	0.286666	0.748386	57.3503	0.0727837	0.193345	0.456819	0.847028	57.3503	-0.0286719	0.178854	0.743875	0.95352
chr1	235129036	235129334	26.1096	-0.0103246	0.249218	0.925847	0.991831	26.1096	0.166004	0.311601	0.149397	0.602758	26.1096	0.228983	0.38119	0.126752	0.529207
chr1	235160753	235161245	37.2581	0.29193	0.358071	0.0621597	0.392355	37.2581	0.11445	0.242524	0.262756	0.726737	37.2581	-0.0775922	0.231562	0.44828	0.85172
chr1	235161380	235161639	21.4182	0.0821031	0.273163	0.482068	0.873484	21.4182	0.0668224	0.246318	0.480766	0.860174	21.4182	-0.000206744	0.239667	0.998385	0.999507
chr1	235327237	235328126	91.6551	0.0781893	0.184155	0.500853	0.880836	91.6551	0.0541007	0.169006	0.585542	0.900154	91.6551	-0.0105733	0.150494	0.895421	0.982937
chr1	235328575	235328804	25.48	-0.0262572	0.243791	0.813849	0.971988	25.48	0.0146937	0.217042	0.870876	0.974788	25.48	0.0406099	0.237439	0.690892	0.941873
chr1	235328998	235329785	72.8754	0.0657255	0.1911	0.569994	0.910223	72.8754	-0.0727644	0.180104	0.463232	0.850539	72.8754	-0.135099	0.217086	0.193702	0.642488
chr1	235330480	235330705	11.7314	0.0708319	0.310768	0.5446	0.898194	11.7314	-0.0870267	0.315558	0.389949	0.815404	11.7314	-0.23844	0.468918	0.145809	0.566038
chr1	235367033	235367203	9.61244	0.0373043	0.314355	0.742735	0.956383	9.61244	-0.0204916	0.283422	0.823596	0.962821	9.61244	-0.0679237	0.340138	0.581868	0.913362
chr1	235367464	235367908	30.282	0.0878384	0.247926	0.4521	0.859665	30.282	-0.0154248	0.210718	0.865378	0.97352	30.282	-0.102014	0.26074	0.356314	0.798721
chr1	235411524	235411924	16.9916	-0.0103621	0.264067	0.925637	0.991831	16.9916	-0.194796	0.386121	0.124465	0.56141	16.9916	-0.223741	0.420364	0.150002	0.573729
chr1	23545115	23545377	16.8904	0.363867	0.504144	0.0501669	0.347353	16.8904	0.0180936	0.249063	0.840815	0.967982	16.8904	-0.326726	0.490939	0.0762283	0.403938
chr1	235504016	235504401	32.9096	-0.0173126	0.227958	0.876832	0.985079	32.9096	-0.00850071	0.205167	0.925922	0.984283	32.9096	0.00596743	0.209959	0.949938	0.992835
chr1	235504741	235505797	145.068	0.125449	0.168127	0.280466	0.74466	145.068	0.116727	0.15846	0.254961	0.719344	145.068	0.00398252	0.130689	0.957719	0.993928
chr1	23553229	23554886	137.296	0.185765	0.181096	0.123929	0.548085	137.296	0.122491	0.162994	0.234805	0.699876	137.296	-0.0275806	0.136419	0.720249	0.947847
chr1	23555122	23556765	125.947	0.186704	0.182493	0.122961	0.546899	125.947	0.0832696	0.159013	0.409888	0.826121	125.947	-0.0587235	0.146758	0.467949	0.862538
chr1	23556963	23559443	203.745	0.140634	0.152926	0.213996	0.682914	203.745	0.170485	0.15005	0.0998588	0.509791	203.745	0.0285402	0.120084	0.692549	0.942628
chr1	23559714	23561702	152.116	0.551279	0.262128	0.000762319	0.0203691	152.116	0.281053	0.199443	0.0177807	0.202901	152.116	-0.0847492	0.14983	0.308598	0.764882
chr1	23561800	23562363	43.6577	0.419983	0.409039	0.0223049	0.213622	43.6577	0.283899	0.348558	0.0421143	0.33594	43.6577	-0.0244319	0.193674	0.78895	0.963763
chr1	23562633	23563025	24.1845	0.552238	0.576957	0.0169779	0.17936	24.1845	0.325755	0.472596	0.0439083	0.345066	24.1845	-0.0407262	0.242229	0.693231	0.942747
chr1	23563140	23563371	12.1039	0.184816	0.411692	0.190194	0.653813	12.1039	0.0499984	0.291071	0.597522	0.903328	12.1039	-0.1011	0.348936	0.42811	0.840971
chr1	23563605	23563959	18.571	0.581972	0.621306	0.016132	0.174335	18.571	0.139631	0.328093	0.210138	0.677592	18.571	-0.159672	0.346414	0.232769	0.690146
chr1	23564199	23564525	16.7413	0.459647	0.572154	0.0299141	0.256212	16.7413	0.114266	0.312244	0.279457	0.740743	16.7413	-0.148891	0.347037	0.261475	0.720954
chr1	23564701	23564917	12.8804	0.0604383	0.304031	0.600686	0.919694	12.8804	0.0410399	0.27011	0.657621	0.923597	12.8804	-0.00934213	0.287605	0.933781	0.989721
chr1	23565276	23565446	8.0876	0.17046	0.425748	0.215811	0.68429	8.0876	0.012075	0.299663	0.896185	0.978746	8.0876	-0.162484	0.431492	0.264514	0.7247
chr1	23565797	23565942	7.24904	0.0457432	0.346308	0.68961	0.942046	7.24904	0.073594	0.340315	0.463829	0.851013	7.24904	0.0407211	0.350333	0.740055	0.952611
chr1	23568189	23569107	40.1973	0.292043	0.33718	0.0575261	0.375862	40.1973	0.10759	0.226595	0.286368	0.746452	40.1973	-0.0858883	0.225225	0.396973	0.821346
chr1	23575996	23578312	151.685	0.44314	0.232696	0.00253118	0.0496355	151.685	-0.0527361	0.151823	0.59784	0.903328	151.685	-0.65807	0.258051	0.000386734	0.0104129
chr1	235866538	235866931	30.4441	0.357712	0.418041	0.0411315	0.310074	30.4441	0.187044	0.310158	0.115664	0.54434	30.4441	-0.0480117	0.222291	0.626936	0.925565
chr1	235867224	235867786	54.8547	0.0907652	0.212971	0.43809	0.852289	54.8547	0.109105	0.204464	0.282283	0.743585	54.8547	0.0258161	0.178394	0.768164	0.958133
chr1	235868238	235868516	13.8331	0.121159	0.349629	0.336474	0.791106	13.8331	0.593253	0.726214	0.0148554	0.181375	13.8331	0.246866	0.45148	0.131626	0.538535
chr1	235883162	235883521	15.458	0.559941	0.67925	0.019524	0.196466	15.458	1.05702	0.900406	0.00322083	0.0673819	15.458	0.0771209	0.300642	0.510916	0.885035
chr1	235900709	235900993	17.6134	-0.127012	0.320286	0.31191	0.771866	17.6134	-0.0121614	0.236818	0.892092	0.977789	17.6134	0.108187	0.318367	0.379289	0.812209
chr1	235901300	235901565	13.4975	-0.0873323	0.313525	0.463711	0.865201	13.4975	-0.0160139	0.252759	0.858963	0.971924	13.4975	0.065934	0.308262	0.576579	0.91101
chr1	235901781	235901959	8.38572	-0.219017	0.479586	0.14272	0.582871	8.38572	-0.0218522	0.288287	0.812808	0.960034	8.38572	0.190602	0.469835	0.214171	0.667355
chr1	235902800	235903782	81.5168	-0.112695	0.201937	0.342216	0.795864	81.5168	0.0557934	0.17657	0.570741	0.89634	81.5168	0.17196	0.240872	0.129847	0.535021
chr1	235908510	235908741	16.479	0.08487	0.299222	0.472831	0.868692	16.479	0.0171201	0.248302	0.849166	0.969821	16.479	-0.0604996	0.288482	0.595641	0.918233
chr1	235908945	235910392	116.153	-0.043427	0.169807	0.704402	0.946353	116.153	0.0594773	0.158299	0.552571	0.88916	116.153	0.0837106	0.161374	0.331293	0.782559
chr1	235910562	235912294	112.843	-0.146818	0.182549	0.218014	0.686809	112.843	0.0730586	0.160059	0.467748	0.853611	112.843	0.236216	0.236159	0.0505658	0.318061
chr1	235912655	235914037	87.8852	-0.231781	0.225899	0.0767126	0.435181	87.8852	0.00870344	0.166778	0.929381	0.984358	87.8852	0.23624	0.262691	0.0627375	0.361175
chr1	235914316	235914542	14.4843	-0.0710553	0.300558	0.542055	0.897421	14.4843	0.0219621	0.25004	0.807857	0.959366	14.4843	0.106709	0.33195	0.394726	0.819945
chr1	235916573	235917552	78.1991	-0.413184	0.317617	0.0126632	0.149323	78.1991	-0.065697	0.176502	0.507201	0.870417	78.1991	0.244311	0.282507	0.0651848	0.369636
chr1	235917791	235919321	144.921	-0.0784125	0.163146	0.492668	0.878778	144.921	0.161063	0.162182	0.12546	0.56356	144.921	0.273739	0.227809	0.0270308	0.218775
chr1	235919492	235920043	26.8812	0.123315	0.288202	0.316664	0.775228	26.8812	0.549328	0.579922	0.0122547	0.160953	26.8812	0.220769	0.364928	0.129822	0.535006
chr1	235920402	235920637	11.445	0.29587	0.533276	0.0818232	0.449767	11.445	0.764768	0.87324	0.00838662	0.126682	11.445	0.128379	0.368852	0.336541	0.785843
chr1	235972036	235972617	54.9763	0.24534	0.282051	0.0798163	0.444259	54.9763	0.309324	0.32811	0.0284449	0.271441	54.9763	0.0386299	0.183305	0.664663	0.937077
chr1	23634712	23635721	56.7478	0.369109	0.334829	0.0242808	0.225292	56.7478	0.0205697	0.187346	0.828162	0.964792	56.7478	-0.323258	0.344916	0.0408892	0.280396
chr1	23635992	23636316	12.4461	1.09432	0.86761	0.00241778	0.0480052	12.4461	0.120509	0.364911	0.274058	0.73591	12.4461	-0.473403	0.624527	0.0387892	0.272071
chr1	23636861	23637545	29.0418	0.262641	0.355397	0.0830057	0.452771	29.0418	-0.0276664	0.216814	0.761423	0.950862	29.0418	-0.389793	0.458139	0.0417244	0.2838
chr1	23637767	23638016	17.1418	1.84132	0.742431	9.58788e-05	0.00383261	17.1418	0.292104	0.51902	0.0649649	0.419105	17.1418	-0.579794	0.623075	0.0218278	0.191175
chr1	236604177	236604453	14.8122	0.106521	0.324401	0.384631	0.823	14.8122	0.0676741	0.280837	0.482029	0.860794	14.8122	-0.0189912	0.279526	0.864094	0.978433
chr1	236604630	236605066	36.8123	0.042533	0.224065	0.706717	0.947044	36.8123	0.0340311	0.202589	0.714529	0.939038	36.8123	-0.00118163	0.199624	0.989809	0.998277
chr1	236795363	236795895	41.0643	0.13492	0.245954	0.270848	0.736833	41.0643	0.0410773	0.200468	0.661699	0.925223	41.0643	-0.0650504	0.212707	0.503506	0.881553
chr1	23691856	23692428	29.2912	-0.0093411	0.233351	0.933103	0.991964	29.2912	0.021885	0.210732	0.810537	0.959858	29.2912	0.0317149	0.221943	0.746857	0.953737
chr1	23743085	23743368	20.691	-0.0116475	0.262045	0.916442	0.990472	20.691	0.0187233	0.23502	0.835049	0.966339	20.691	0.0334932	0.260477	0.754694	0.954904
chr1	23743438	23743833	28.9858	0.151406	0.28819	0.234615	0.704173	28.9858	0.0527211	0.223611	0.57138	0.896473	28.9858	-0.0652599	0.240235	0.529032	0.891325
chr1	23778470	23778615	10.2412	-0.0563803	0.31674	0.625291	0.92538	10.2412	-0.0178753	0.271723	0.844472	0.96877	10.2412	0.034759	0.315896	0.76817	0.958133
chr1	23789566	23790097	13.4108	-0.804639	0.785816	0.0071005	0.101358	13.4108	-0.140634	0.345368	0.21272	0.680654	13.4108	0.264298	0.497685	0.124021	0.522545
chr1	23790355	23791005	26.5257	-0.148478	0.29186	0.243075	0.712487	26.5257	-0.0357382	0.217195	0.696837	0.935621	26.5257	0.0862355	0.262629	0.432613	0.843794
chr1	23791257	23791901	29.352	0.00119506	0.232844	0.991428	0.999149	29.352	-0.00107139	0.209741	0.990584	0.998078	29.352	-0.00217867	0.216898	0.982029	0.997292
chr1	23799277	23800186	38.5953	-0.124936	0.249065	0.303471	0.763491	38.5953	0.04692	0.201476	0.618684	0.912384	38.5953	0.203848	0.316744	0.12791	0.531191
chr1	23800280	23800618	22.2789	0.124287	0.298633	0.315796	0.775182	22.2789	0.130702	0.29508	0.224021	0.689871	22.2789	0.0213943	0.241499	0.834968	0.974908
chr1	23825042	23825396	17.4022	-0.0344592	0.268208	0.758534	0.95989	17.4022	-0.0432922	0.246703	0.637609	0.917609	17.4022	-0.0172919	0.262542	0.872058	0.979605
chr1	2391362	2391515	10.5859	0.135687	0.375597	0.295125	0.755935	10.5859	0.154937	0.393241	0.192707	0.658874	10.5859	0.0294728	0.304625	0.799234	0.966837
chr1	2391923	2392360	36.9165	-0.00666211	0.219054	0.952587	0.99408	36.9165	-0.144123	0.25402	0.180296	0.643707	36.9165	-0.154833	0.286193	0.201676	0.651225
chr1	23958621	23959006	25.0575	-0.0782056	0.26329	0.500269	0.880631	25.0575	0.0136878	0.219202	0.879398	0.976985	25.0575	0.0934684	0.275386	0.408827	0.828662
chr1	23959234	23959644	35.1911	-0.00119159	0.229247	0.991465	0.999149	35.1911	0.212983	0.312309	0.0850988	0.477139	35.1911	0.26399	0.368725	0.0849064	0.428919
chr1	23959846	23960728	73.5078	0.262053	0.265321	0.0607502	0.387188	73.5078	0.169259	0.220828	0.123284	0.560205	73.5078	-0.0294291	0.169439	0.730624	0.949902
chr1	23979996	23980325	33.4986	0.0731664	0.239982	0.525236	0.891296	33.4986	0.134837	0.255922	0.203694	0.67129	33.4986	0.0634764	0.226803	0.527513	0.890805
chr1	23980548	23981460	70.7564	0.12704	0.205866	0.289423	0.750878	70.7564	0.168521	0.210698	0.122781	0.559088	70.7564	0.0407517	0.167578	0.633111	0.92766
chr1	24021558	24021739	6.30954	0.186255	0.547908	0.115612	NA	6.30954	0.0793538	0.449667	0.400195	0.819847	6.30954	-0.0947922	0.486356	0.442724	0.849391
chr1	24022300	24022724	23.4396	1.57688	0.696414	0.000251861	0.00855815	23.4396	1.75252	0.71408	0.000173069	0.00831711	23.4396	0.00935274	0.228578	0.925146	0.988113
chr1	24023171	24023421	10.2773	0.865564	0.930586	0.00371783	0.0649974	10.2773	1.09021	1.08939	0.00236067	0.0548335	10.2773	0.0203455	0.305777	0.86061	0.978226
chr1	24045726	24046186	18.2686	0.128245	0.306363	0.304809	0.764263	18.2686	-0.767573	0.789303	0.00771611	0.120537	18.2686	-1.64692	0.751389	0.000342398	0.00950866
chr1	2405672	2405842	5.37918	-0.0498739	0.372687	0.661152	NA	5.37918	-0.197082	0.529249	0.129858	0.571247	5.37918	-0.156327	0.493417	0.273693	0.733788
chr1	2412301	2412538	19.9892	0.0736415	0.283132	0.526055	0.891576	19.9892	0.325444	0.483314	0.0454789	0.349334	19.9892	0.197875	0.376045	0.170288	0.608639
chr1	2412808	2414569	180.875	0.0107193	0.149237	0.923069	0.991545	180.875	-0.0618137	0.142297	0.534207	0.881539	180.875	-0.0544714	0.130289	0.474032	0.867395
chr1	241519192	241519689	38.4546	0.162311	0.264843	0.20229	0.669669	38.4546	-0.0274146	0.202965	0.767022	0.95223	38.4546	-0.215817	0.325135	0.115981	0.505261
chr1	241847873	241848156	28.8424	-0.133002	0.275952	0.282962	0.746208	28.8424	-0.00165114	0.208797	0.985506	0.996293	28.8424	0.124302	0.283719	0.290119	0.748272
chr1	243254203	243255847	185.281	0.0602274	0.148911	0.58791	0.915631	185.281	-0.00823363	0.139689	0.933469	0.985252	185.281	-0.0467056	0.126276	0.53117	0.892239
chr1	243256104	243256630	38.7404	0.0102054	0.219812	0.927423	0.991831	38.7404	-0.107774	0.231579	0.285736	0.745937	38.7404	-0.133344	0.270164	0.248278	0.708228
chr1	243264880	243265162	10.2642	-0.100523	0.342058	0.410903	0.839897	10.2642	-0.446992	0.689874	0.029149	0.275354	10.2642	-0.226013	0.487919	0.164127	0.598501
chr1	243265420	243265987	20.181	-0.0879423	0.275077	0.45455	0.860832	20.181	-0.45664	0.576993	0.022413	0.236976	20.181	-0.247596	0.42454	0.122146	0.518403
chr1	243266404	243270443	334.786	-0.107891	0.125165	0.293292	0.753706	334.786	-0.380112	0.153196	0.000546063	0.0195171	334.786	-0.23977	0.156923	0.0165804	0.158873
chr1	243270652	243270876	11.8048	-0.000348484	0.290076	0.997509	0.999299	11.8048	-0.311471	0.558178	0.0592511	0.402111	11.8048	-0.389821	0.600083	0.0601845	0.352972
chr1	243271173	243271366	9.61872	-0.0748276	0.328633	0.525982	0.891576	9.61872	-1.15603	1.11112	0.00188349	0.0470522	9.61872	-0.772656	0.909416	0.00896451	0.104578
chr1	243283725	243284028	16.2551	-0.0744925	0.289886	0.522605	0.890614	16.2551	-0.103216	0.296422	0.314899	0.767521	16.2551	-0.0404182	0.281032	0.717541	0.947265
chr1	243284110	243287696	241.045	-0.372178	0.171137	0.00254293	0.0497687	241.045	-0.284257	0.155786	0.00884771	0.131838	241.045	0.0295955	0.114031	0.67314	0.939337
chr1	243288207	243288439	7.29136	-0.75436	0.90058	0.00521385	0.0821461	7.29136	-0.273602	0.558202	0.0768989	0.455916	7.29136	0.198966	0.525198	0.194355	0.643094
chr1	243324849	243325019	4.35707	-0.109425	0.426479	0.364289	NA	4.35707	-0.110535	0.423846	0.308424	NA	4.35707	-0.0130661	0.407658	0.915359	NA
chr1	243850492	243851103	32.3004	0.0299871	0.227277	0.789284	0.966597	32.3004	-0.106939	0.240615	0.289325	0.74929	32.3004	-0.168018	0.306509	0.186088	0.631685
chr1	244047415	244048120	58.5391	0.308109	0.290794	0.0385273	0.299039	58.5391	-0.608506	0.465511	0.00400149	0.0776086	58.5391	-1.58604	0.362281	1.1497e-06	8.7783e-05
chr1	244048638	244048940	29.0626	0.084597	0.250739	0.467707	0.866288	29.0626	0.021045	0.213194	0.817125	0.961115	29.0626	-0.0502151	0.230535	0.618374	0.923498
chr1	244163067	244164187	66.82	-1.70126	0.354502	2.39779e-07	2.33881e-05	66.82	-0.00596562	0.175512	0.950828	0.988235	66.82	1.68146	0.360664	3.09536e-07	2.86536e-05
chr1	244164333	244164668	22.4971	-1.34058	0.772386	0.000859473	0.0223315	22.4971	0.0233061	0.226948	0.796361	0.955983	22.4971	1.60771	0.728475	0.00036639	0.0100036
chr1	244214076	244214315	10.0495	-0.437234	0.663842	0.0334952	0.275131	10.0495	-0.000117986	0.275024	0.998965	0.999807	10.0495	0.505166	0.718559	0.0333688	0.248326
chr1	244451176	244451893	75.2804	0.120734	0.20171	0.311271	0.771249	75.2804	0.0979893	0.18477	0.33224	0.779108	75.2804	-0.00401914	0.159187	0.961181	0.994497
chr1	244460522	244461425	73.5418	0.0406204	0.189697	0.723444	0.951459	73.5418	-0.0253798	0.174554	0.794189	0.95558	73.5418	-0.0535536	0.172652	0.538823	0.896096
chr1	244461540	244461779	21.7524	0.00953459	0.251226	0.931492	0.991964	21.7524	0.0281084	0.227775	0.756392	0.949567	21.7524	0.0229458	0.242457	0.823602	0.971778
chr1	244652495	244652681	13.6718	0.0751447	0.3015	0.520969	0.890614	13.6718	0.00321972	0.253357	0.97141	0.993502	13.6718	-0.0716521	0.305029	0.543073	0.898438
chr1	244653101	244653736	63.7582	0.0292091	0.196707	0.798032	0.968382	63.7582	0.128234	0.200903	0.217385	0.68375	63.7582	0.0935702	0.20025	0.330773	0.782333
chr1	244832794	244833112	18.2528	-0.207741	0.371718	0.147722	0.590205	18.2528	-0.197575	0.371694	0.1173	0.547929	18.2528	-0.0116136	0.26343	0.913979	0.985924
chr1	244833198	244836706	434.738	-0.0353971	0.115921	0.717866	0.950711	434.738	0.104155	0.111945	0.25206	0.716737	434.738	0.112159	0.116938	0.132823	0.541173
chr1	244863260	244864477	167.306	0.0533848	0.154391	0.634735	0.927678	167.306	0.0774587	0.14633	0.439536	0.838535	167.306	0.0216488	0.125011	0.768695	0.958201
chr1	244864711	244866304	152.507	0.00180061	0.156747	0.987237	0.999149	152.507	-0.0473972	0.148173	0.634593	0.916409	152.507	-0.037276	0.132416	0.624409	0.925451
chr1	244866395	244866565	12.7537	0.06572	0.303048	0.571073	0.910391	12.7537	-0.0106168	0.259983	0.906357	0.980402	12.7537	-0.0833545	0.321783	0.493166	0.877188
chr1	244866703	244867033	16.8267	0.026271	0.267457	0.813939	0.971988	16.8267	-0.084999	0.279062	0.389187	0.814602	16.8267	-0.144892	0.349899	0.274576	0.734928
chr1	244867131	244867366	11.1391	0.0112252	0.293131	0.920036	0.990954	11.1391	-0.203376	0.447744	0.126144	0.565388	11.1391	-0.291872	0.524939	0.104762	0.48014
chr1	244969337	244969533	15.4814	0.165683	0.359012	0.218792	0.688332	15.4814	0.031824	0.255337	0.726951	0.942569	15.4814	-0.110647	0.325364	0.374432	0.809415
chr1	244969655	244970631	121.756	-0.0190715	0.166643	0.867063	0.983409	121.756	0.0695147	0.157046	0.489156	0.863352	121.756	0.0712818	0.153035	0.391755	0.818868
chr1	244970817	244972292	186.332	-0.0539114	0.149215	0.627747	0.926042	186.332	0.051785	0.13983	0.600801	0.904334	186.332	0.0800857	0.137707	0.314007	0.76876
chr1	24502455	24502713	14.1962	0.142017	0.347938	0.27366	0.738764	14.1962	0.0701392	0.281003	0.467827	0.853611	14.1962	-0.0422834	0.283522	0.706511	0.944674
chr1	24642439	24642865	47.7627	0.242739	0.286571	0.0835825	0.454561	47.7627	0.0810156	0.203751	0.407844	0.825069	47.7627	-0.0911656	0.216702	0.361077	0.80067
chr1	24643302	24643938	44.8959	0.0633501	0.220588	0.580537	0.912684	44.8959	0.0508905	0.199917	0.591538	0.902292	44.8959	-0.00172565	0.190698	0.984757	0.997765
chr1	24643973	24644204	8.31624	-0.0198916	0.32122	0.859939	0.981207	8.31624	-0.015783	0.289404	0.863905	0.973241	8.31624	0.000742082	0.330168	0.995037	0.998841
chr1	246565765	246566176	33.8945	0.0461183	0.231753	0.683108	0.93977	33.8945	0.0686638	0.218063	0.471729	0.855536	33.8945	0.0295107	0.211787	0.75797	0.956139
chr1	246566514	246567057	49.666	0.257724	0.292543	0.0715204	0.419217	49.666	0.0550363	0.196232	0.56519	0.893785	49.666	-0.136963	0.246513	0.216056	0.670497
chr1	246698971	246699216	8.82659	0.0318835	0.32413	0.778638	0.964468	8.82659	0.024905	0.292452	0.788169	0.954271	8.82659	-0.00166251	0.326059	0.988831	0.998277
chr1	246724453	246724657	19.8486	0.162032	0.333988	0.221042	0.69071	19.8486	0.0769818	0.262563	0.426034	0.83339	19.8486	-0.0468539	0.260089	0.662844	0.936758
chr1	24683493	24683708	10.0203	-0.0433158	0.320751	0.704638	0.94637	10.0203	0.053522	0.293788	0.574188	0.896916	10.0203	0.126499	0.384959	0.350115	0.794497
chr1	246930924	246931432	38.9811	0.186358	0.27957	0.15754	0.607038	38.9811	0.0844201	0.218064	0.38704	0.813641	38.9811	-0.0536089	0.210956	0.57773	0.91186
chr1	246931531	246931918	49.1673	0.0894265	0.217322	0.444319	0.855078	49.1673	-0.0187511	0.190024	0.842216	0.968261	49.1673	-0.0978341	0.221556	0.334852	0.784631
chr1	247078532	247078773	13.1133	-0.0986751	0.32227	0.415611	0.84256	13.1133	-0.0496719	0.268618	0.594825	0.902951	13.1133	0.032951	0.295258	0.77311	0.959284
chr1	247111398	247111855	35.2957	-0.0319768	0.231066	0.775532	0.96368	35.2957	0.0389758	0.209433	0.674037	0.929392	35.2957	0.0726095	0.235935	0.481061	0.870624
chr1	247331325	247331819	32.8132	-0.156937	0.275751	0.217752	0.686614	32.8132	-0.149526	0.266451	0.170649	0.634363	32.8132	-0.0123717	0.213949	0.897515	0.983025
chr1	247331914	247332988	63.7638	-0.290776	0.284372	0.0462256	0.331285	63.7638	-0.0167458	0.178095	0.862119	0.972894	63.7638	0.250978	0.300812	0.0678241	0.378121
chr1	24745442	24745888	23.2613	0.111055	0.283705	0.359187	0.805751	23.2613	0.0869366	0.254675	0.37494	0.806297	23.2613	-0.0035123	0.234186	0.972218	0.99631
chr1	24746076	24746221	4.70702	0.0169194	0.385522	0.876578	NA	4.70702	0.0693447	0.386075	0.48793	NA	4.70702	0.0685818	0.422527	0.590966	NA
chr1	248826069	248826266	24.3033	0.0953133	0.269506	0.420551	0.845073	24.3033	0.0558398	0.232865	0.549435	0.888067	24.3033	-0.0212618	0.232532	0.832604	0.974468
chr1	248826366	248826672	35.0357	0.034495	0.225431	0.759175	0.9601	35.0357	-0.164802	0.279343	0.143282	0.592229	35.0357	-0.278467	0.380847	0.0777671	0.408574
chr1	248838245	248839148	114.978	0.192821	0.190138	0.115989	0.533157	114.978	0.110702	0.166681	0.280297	0.741639	114.978	-0.0397863	0.144546	0.616933	0.923319
chr1	248857928	248858968	77.8914	-0.177693	0.215464	0.154964	0.602894	77.8914	0.0715313	0.175035	0.47268	0.856008	77.8914	0.318016	0.306508	0.03273	0.244898
chr1	248859228	248859534	21.9143	0.0761744	0.268114	0.511101	0.885729	21.9143	0.0164331	0.227525	0.855017	0.971199	21.9143	-0.050649	0.253769	0.633346	0.927727
chr1	248872446	248873792	140.009	-0.041446	0.162142	0.715233	0.94982	140.009	-0.00496427	0.150491	0.960148	0.990625	140.009	0.0240796	0.133782	0.752029	0.954401
chr1	248905895	248906095	13.0256	0.12289	0.345928	0.330229	0.786397	13.0256	0.124143	0.339993	0.256189	0.720176	13.0256	0.0177174	0.28495	0.874319	0.979764
chr1	248906239	248906574	23.7809	0.0575955	0.254932	0.612461	0.922631	23.7809	0.0252439	0.223661	0.780436	0.953093	23.7809	-0.0233208	0.235641	0.818019	0.971023
chr1	25022567	25022987	14.3159	-0.21793	0.410025	0.14145	0.580022	14.3159	-0.159819	0.361139	0.174799	0.63893	14.3159	0.0144663	0.287924	0.897723	0.983025
chr1	25232655	25233223	49.5641	0.0197387	0.209522	0.861319	0.981467	49.5641	0.0425677	0.193074	0.65424	0.922499	49.5641	0.0243351	0.187463	0.786303	0.963073
chr1	25239175	25239721	31.7974	-0.0627281	0.239646	0.582685	0.913424	31.7974	0.0471432	0.212187	0.613005	0.910168	31.7974	0.120747	0.272469	0.292719	0.750168
chr1	25239883	25240523	38.1843	-0.0670764	0.230831	0.558623	0.904871	38.1843	0.0856941	0.216156	0.381138	0.809412	38.1843	0.18928	0.30834	0.145979	0.566389
chr1	25246487	25247434	67.3345	0.00445437	0.194147	0.968813	0.996677	67.3345	-0.0414681	0.180712	0.668842	0.927815	67.3345	-0.0405952	0.175205	0.64162	0.930597
chr1	25247659	25248109	32.7682	0.17305	0.288181	0.18532	0.64626	32.7682	0.00345246	0.208644	0.96971	0.993118	32.7682	-0.16162	0.301441	0.196915	0.646196
chr1	2525879	2526213	22.4429	0.245611	0.385033	0.105369	0.508256	22.4429	0.0741337	0.253378	0.439886	0.838536	22.4429	-0.0993619	0.284576	0.389856	0.817895
chr1	2526428	2526580	14.0365	0.0564883	0.291892	0.622119	0.92472	14.0365	0.0127893	0.252676	0.887001	0.977257	14.0365	-0.0397433	0.285951	0.72435	0.948052
chr1	25267603	25267787	12.4448	0.076498	0.31381	0.51586	0.888074	12.4448	0.0305874	0.267683	0.738481	0.945265	12.4448	-0.0366125	0.296653	0.749483	0.954056
chr1	25337952	25338179	15.472	-0.0380644	0.281015	0.73552	0.954267	15.472	-0.0736512	0.278708	0.447587	0.841902	15.472	-0.047674	0.290165	0.675267	0.939814
chr1	25338312	25338848	51.1806	0.0040842	0.204626	0.971206	0.997401	51.1806	-0.0686795	0.196029	0.479402	0.859381	51.1806	-0.0706873	0.203833	0.459012	0.857722
chr1	2543710	2544355	40.9707	1.34415	0.481232	0.00011146	0.00436852	40.9707	-0.0326382	0.208528	0.723431	0.941682	40.9707	-1.53333	0.438873	2.56312e-05	0.00118111
chr1	2544622	2544836	12.7684	0.759367	0.768541	0.00846516	0.114146	12.7684	0.0670226	0.3047	0.492247	0.863999	12.7684	-0.444688	0.606531	0.0443942	0.294283
chr1	2545684	2546071	32.2037	0.443951	0.454356	0.0227095	0.21595	32.2037	-0.0109174	0.211843	0.90421	0.980144	32.2037	-0.561326	0.51405	0.0162817	0.157308
chr1	2546430	2546977	67.2274	0.31244	0.2803	0.0342804	0.278568	67.2274	-0.00375569	0.178556	0.96884	0.992648	67.2274	-0.33924	0.327679	0.030699	0.235593
chr1	2547175	2547683	31.8132	0.198023	0.303653	0.144756	0.586022	31.8132	-0.151322	0.284532	0.171052	0.634697	31.8132	-0.826329	0.576174	0.00510438	0.071573
chr1	2548276	2548564	19.4845	0.0559183	0.264723	0.622868	0.92472	19.4845	-0.0567369	0.247771	0.543812	0.885467	19.4845	-0.140836	0.329892	0.273117	0.733352
chr1	2548940	2549302	13.6924	-0.0884875	0.315887	0.458805	0.862968	13.6924	-0.129205	0.343298	0.242368	0.706886	13.6924	-0.0498154	0.307517	0.670596	0.938627
chr1	25799846	25800043	7.39251	-0.0729495	0.359624	0.535998	0.895114	7.39251	0.000718555	0.297142	0.993784	0.998652	7.39251	0.0808121	0.379412	0.530429	0.892153
chr1	25819968	25820644	51.1995	0.179105	0.248921	0.162374	0.613833	51.1995	0.11646	0.212987	0.255024	0.719364	51.1995	-0.023567	0.181361	0.789447	0.963879
chr1	25820991	25821270	12.477	0.0553882	0.307345	0.630235	0.926436	12.477	0.0307667	0.270927	0.737521	0.945034	12.477	-0.016978	0.296122	0.881722	0.980973
chr1	2585634	2586399	56.306	0.462121	0.381395	0.01241	0.147259	56.306	0.0625001	0.194885	0.517582	0.874885	56.306	-0.270797	0.321548	0.0615336	0.3574
chr1	25859612	25860057	30.8164	0.0659722	0.239538	0.56438	0.907512	30.8164	-0.010822	0.209113	0.905339	0.980144	30.8164	-0.0722167	0.238879	0.486212	0.873073
chr1	25866746	25866916	4.05523	0.0413151	0.39104	0.708541	NA	4.05523	-0.0117919	0.360355	0.899631	NA	4.05523	-0.0630478	0.426522	0.618042	NA
chr1	25874421	25874606	5.03208	-0.00876598	0.361641	0.937197	NA	5.03208	-0.0283237	0.339151	0.765123	0.952217	5.03208	-0.0271456	0.387098	0.826828	0.973213
chr1	25874639	25875975	79.8915	0.0951853	0.193098	0.416865	0.842856	79.8915	0.0521625	0.174223	0.596411	0.903143	79.8915	-0.023683	0.158942	0.774742	0.959898
chr1	25876150	25876382	11.84	0.411275	0.609086	0.0407827	0.308764	11.84	0.318425	0.569716	0.0570997	0.39468	11.84	-0.0182631	0.295276	0.872693	0.979665
chr1	25891778	25893994	146.965	0.243495	0.183239	0.0488289	0.341374	146.965	0.180267	0.166254	0.0910523	0.490526	146.965	-0.0217573	0.128736	0.770928	0.958849
chr1	25897437	25897813	6.84625	-0.00288284	0.339046	0.979503	0.998586	6.84625	-0.089488	0.370631	0.390574	0.815549	6.84625	-0.112406	0.418618	0.406675	0.827371
chr1	25898470	25898696	3.97685	-0.0624846	0.393527	0.582519	NA	3.97685	-0.107886	0.427528	0.315681	NA	3.97685	-0.0575037	0.425492	0.647278	NA
chr1	25900201	25900395	3.72294	-0.0203639	0.392667	0.85044	NA	3.72294	-0.0146657	0.363506	0.875343	NA	3.72294	0.00400049	0.417876	0.973829	NA
chr1	25905782	25906341	40.709	0.13475	0.250576	0.272268	0.737698	40.709	0.134347	0.241013	0.202545	0.669449	40.709	0.0156275	0.195375	0.864473	0.978433
chr1	25921531	25921810	11.4592	-0.0320191	0.297372	0.776561	0.963945	11.4592	-0.0572428	0.285563	0.547622	0.887375	11.4592	-0.0367156	0.307667	0.752905	0.954588
chr1	25922189	25923402	101.841	0.150781	0.190715	0.210383	0.678421	101.841	0.313853	0.245015	0.0153049	0.184867	101.841	0.107975	0.179548	0.243396	0.702281
chr1	25997410	25998063	32.5469	0.114667	0.260387	0.341468	0.795575	32.5469	0.206509	0.316715	0.0930443	0.495258	32.5469	0.0748463	0.235885	0.468137	0.862572
chr1	25998444	25998692	10.4132	-0.0445953	0.317196	0.696443	0.944423	10.4132	0.0262607	0.27726	0.774991	0.952717	10.4132	0.0849015	0.348037	0.5	0.879462
chr1	26035546	26035980	28.7057	-0.0589295	0.246553	0.604506	0.920634	28.7057	0.00258296	0.212467	0.977233	0.994279	28.7057	0.0565298	0.240122	0.584108	0.91396
chr1	26111010	26111648	54.4741	0.220214	0.267675	0.10323	0.503701	54.4741	0.180721	0.245697	0.109641	0.531282	54.4741	-0.00332968	0.176913	0.969452	0.996048
chr1	26111887	26112206	27.5517	0.0538413	0.244112	0.634754	0.927678	27.5517	-0.0181406	0.215944	0.841353	0.968133	27.5517	-0.0714948	0.248824	0.499784	0.879462
chr1	26112273	26112723	19.394	0.0188537	0.265726	0.865464	0.982732	19.394	0.20942	0.378847	0.104825	0.520986	19.394	0.218038	0.39514	0.147692	0.569683
chr1	26121961	26123231	59.6116	-0.269955	0.300107	0.0637704	0.397034	59.6116	0.490318	0.400165	0.00644802	0.106753	59.6116	1.45966	0.37166	6.90349e-06	0.000391044
chr1	26123900	26124418	29.5572	-0.0455108	0.244265	0.686274	0.940879	29.5572	0.247869	0.357344	0.0650746	0.419288	29.5572	0.483199	0.502438	0.0257084	0.211858
chr1	26125574	26126392	37.5798	-0.108194	0.259922	0.365925	0.810954	37.5798	1.14344	0.56955	0.000551172	0.0196549	37.5798	1.63745	0.461779	1.98188e-05	0.000962018
chr1	26126730	26127454	36.2702	-0.0713893	0.235801	0.534807	0.894561	36.2702	0.143925	0.251353	0.18026	0.643698	36.2702	0.333922	0.403304	0.0515498	0.322086
chr1	26170054	26170260	14.9522	-0.0905464	0.311497	0.448804	0.857602	14.9522	0.0100225	0.247412	0.911084	0.981429	14.9522	0.109554	0.3348	0.385134	0.81485
chr1	26234266	26234450	15.007	-0.0266274	0.282941	0.812179	0.971645	15.007	0.111469	0.306438	0.287367	0.747563	15.007	0.188997	0.39662	0.196286	0.645388
chr1	26277990	26278160	2.81001	-0.352201	0.716886	0.0126892	NA	2.81001	-0.113941	0.463935	0.279027	NA	2.81001	0.202117	0.605184	0.116024	NA
chr1	26279324	26279642	13.8187	0.0372723	0.284536	0.740953	0.955599	13.8187	-0.0809108	0.293643	0.413363	0.82876	13.8187	-0.159951	0.382923	0.252845	0.712994
chr1	26279743	26279999	17.072	0.0376836	0.271389	0.737387	0.954922	17.072	-0.0245449	0.24406	0.785783	0.954244	17.072	-0.0693521	0.287978	0.54416	0.898563
chr1	26280112	26280443	22.2001	-0.0530229	0.25898	0.639898	0.92798	22.2001	-0.0530519	0.237151	0.567992	0.895163	22.2001	-0.0102765	0.243745	0.920605	0.987068
chr1	2642437	2643231	51.5684	-0.101586	0.218098	0.389378	0.826379	51.5684	-0.0842443	0.198711	0.393051	0.817131	51.5684	0.00111045	0.181629	0.989943	0.998277
chr1	26431829	26432059	10.5631	0.15177	0.384543	0.254323	0.72212	10.5631	-0.0234427	0.283781	0.799068	0.956496	10.5631	-0.223346	0.465945	0.164136	0.598501
chr1	26472472	26473004	53.4075	-0.0533287	0.208031	0.641392	0.928764	53.4075	0.0703885	0.192637	0.470971	0.854965	53.4075	0.126791	0.235115	0.236613	0.693915
chr1	26500467	26501015	45.3324	0.0478164	0.215784	0.674284	0.937973	45.3324	-0.00145616	0.193412	0.987537	0.997111	45.3324	-0.0404906	0.197913	0.662266	0.936755
chr1	26501103	26501641	44.1242	-0.128953	0.24932	0.290263	0.751497	44.1242	0.0834262	0.211202	0.393403	0.817131	44.1242	0.309657	0.379285	0.0571384	0.341766
chr1	26529814	26530207	17.0524	-0.0850507	0.297012	0.471609	0.867784	17.0524	-0.0123689	0.240989	0.890308	0.977596	17.0524	0.0672825	0.292174	0.558774	0.903982
chr1	26530401	26530669	9.74579	-0.0662328	0.324768	0.57063	0.910261	9.74579	-0.102899	0.34134	0.329385	0.776712	9.74579	-0.0491197	0.332553	0.684917	0.941383
chr1	26619265	26620864	141.653	0.145602	0.171235	0.214924	0.683639	141.653	0.221636	0.180964	0.0465148	0.353862	141.653	0.0592544	0.142349	0.457459	0.856813
chr1	26620992	26622055	94.7849	-0.186142	0.208011	0.1358	0.57125	94.7849	0.0645088	0.16896	0.517769	0.874974	94.7849	0.303938	0.287077	0.032762	0.244962
chr1	26692111	26693025	79.6816	-0.111439	0.196329	0.346411	0.797765	79.6816	0.0195643	0.170386	0.841481	0.968133	79.6816	0.111297	0.199002	0.253383	0.712994
chr1	26693224	26697544	342.431	0.129783	0.125003	0.205997	0.673838	342.431	0.0290194	0.117839	0.755423	0.949263	342.431	-0.0664757	0.109856	0.338335	0.78663
chr1	26785972	26786958	74.0076	0.0083252	0.190291	0.941871	0.992733	74.0076	0.126707	0.192513	0.222272	0.68856	74.0076	0.112739	0.203765	0.253239	0.712994
chr1	26787125	26789224	211.499	0.15299	0.154959	0.179351	0.63826	211.499	0.245742	0.164785	0.0249511	0.253826	211.499	0.068891	0.132137	0.372654	0.808533
chr1	26825858	26826568	30.9606	-0.211939	0.322774	0.129549	0.558919	30.9606	-0.0752562	0.225727	0.433324	0.835729	30.9606	0.0794605	0.250583	0.456796	0.856578
chr1	26865357	26866034	37.1786	-0.145464	0.268567	0.245337	0.71474	37.1786	0.0175992	0.202289	0.848476	0.969581	37.1786	0.172425	0.305672	0.176091	0.617502
chr1	26889850	26890248	29.5873	0.147429	0.281839	0.243305	0.712724	29.5873	0.0246755	0.214422	0.786525	0.954244	29.5873	-0.0996089	0.261336	0.367534	0.805276
chr1	26890437	26890803	14.6035	-0.0562644	0.290103	0.623234	0.92472	14.6035	-0.000174883	0.246153	0.998442	0.999807	14.6035	0.0562745	0.293339	0.623916	0.925138
chr1	26900493	26900851	18.9892	-0.0777675	0.281503	0.504707	0.88227	18.9892	-0.0827327	0.267514	0.397561	0.818083	18.9892	-0.018658	0.260978	0.861635	0.978412
chr1	26921763	26922099	26.9833	0.0417793	0.244524	0.710121	0.948338	26.9833	0.122716	0.264389	0.239652	0.704211	26.9833	0.0871663	0.257871	0.423444	0.837343
chr1	27013172	27013419	12.0645	-0.154111	0.371754	0.247184	0.716291	12.0645	-0.127145	0.343799	0.24842	0.712951	12.0645	0.00150319	0.300353	0.989547	0.998277
chr1	27234079	27234296	7.47173	-0.0116412	0.334431	0.917537	0.990777	7.47173	0.0209428	0.302692	0.821932	0.962389	7.47173	0.040237	0.352979	0.743511	0.95352
chr1	27322305	27322596	22.3113	0.212423	0.363973	0.139409	0.576914	22.3113	0.255982	0.411232	0.0702237	0.434481	22.3113	0.0340672	0.242672	0.741278	0.953139
chr1	27365281	27365451	6.79635	-0.117049	0.394666	0.350874	0.800434	6.79635	-0.0982772	0.367894	0.35338	0.793365	6.79635	0.00159426	0.358842	0.989593	0.998277
chr1	27366021	27366523	41.7589	-0.00394011	0.216868	0.971982	0.99744	41.7589	-0.0296543	0.199019	0.750424	0.948601	41.7589	-0.0261691	0.200048	0.778083	0.961102
chr1	27366638	27366956	26.5321	-0.0216042	0.238986	0.846254	0.979465	26.5321	-0.0161888	0.214696	0.858252	0.971678	26.5321	0.00162834	0.224152	0.986806	0.998258
chr1	27392644	27393027	19.0711	-0.455367	0.566586	0.0304022	0.258848	19.0711	0.039386	0.236	0.666619	0.926816	19.0711	0.777076	0.697516	0.0100775	0.114125
chr1	27489478	27490175	64.9386	0.10653	0.206807	0.367881	0.812252	64.9386	0.0542323	0.18304	0.577738	0.89776	64.9386	-0.0299099	0.171185	0.727742	0.949345
chr1	27490348	27490553	20.5086	0.0902719	0.281555	0.444865	0.855078	20.5086	0.0936667	0.267688	0.346766	0.788104	20.5086	0.0178661	0.244853	0.86285	0.978431
chr1	27490733	27491024	19.4642	0.0342648	0.266153	0.759738	0.960224	19.4642	0.122515	0.296252	0.248158	0.712548	19.4642	0.0999774	0.296857	0.39744	0.821638
chr1	27504191	27504683	25.2499	0.0196568	0.242384	0.859779	0.981207	25.2499	0.0278085	0.219417	0.759817	0.950193	25.2499	0.01267	0.2278	0.898555	0.983025
chr1	27504775	27504948	10.6883	0.0213999	0.305763	0.849145	0.980095	10.6883	0.072918	0.303523	0.458411	0.847571	10.6883	0.0665098	0.32624	0.583119	0.913529
chr1	27525839	27526060	7.49561	0.404867	0.646352	0.0395366	0.302598	7.49561	0.0430347	0.33021	0.653885	0.922466	7.49561	-0.305672	0.568767	0.0973863	0.461504
chr1	27527648	27527818	4.71058	0.121971	0.429373	0.325192	NA	4.71058	-0.0155939	0.349802	0.86818	NA	4.71058	-0.16786	0.49214	0.252263	NA
chr1	27540290	27540797	18.504	-0.253065	0.413755	0.103914	0.505644	18.504	-0.0916233	0.272242	0.356778	0.795852	18.504	0.0850261	0.299417	0.4696	0.863552
chr1	27540987	27541732	25.9553	-0.195767	0.326798	0.154687	0.602435	25.9553	-0.0904952	0.243996	0.357313	0.796311	25.9553	0.0539309	0.246755	0.606481	0.920842
chr1	27541933	27542515	34.1333	0.0620393	0.232484	0.586973	0.915245	34.1333	-0.150143	0.271869	0.170532	0.634363	34.1333	-0.329039	0.414193	0.0567038	0.340168
chr1	27542855	27543069	14.7679	0.0725699	0.296359	0.533515	0.89426	14.7679	0.0210174	0.251853	0.81599	0.960706	14.7679	-0.0441183	0.283696	0.694648	0.942761
chr1	27543731	27543925	11.4139	0.219331	0.445714	0.143568	0.584288	11.4139	0.105675	0.340822	0.318661	0.770843	11.4139	-0.0571233	0.31604	0.631068	0.926697
chr1	27544354	27544541	9.00657	0.147994	0.394939	0.264015	0.729763	9.00657	-0.00430765	0.290058	0.962593	0.99103	9.00657	-0.171725	0.431663	0.24405	0.703198
chr1	27571549	27571719	5.61023	0.215673	0.509502	0.138134	NA	5.61023	0.0312463	0.345895	0.742475	0.946562	5.61023	-0.176023	0.482379	0.239453	0.697366
chr1	27575667	27575812	8.95921	0.0377159	0.328696	0.740536	0.955599	8.95921	0.101497	0.350645	0.337225	0.782162	8.95921	0.0791463	0.354496	0.530479	0.892153
chr1	27659754	27660094	17.2875	-0.059266	0.281671	0.604805	0.920634	17.2875	-0.0346048	0.246563	0.704034	0.937164	17.2875	0.0152667	0.268181	0.888164	0.982031
chr1	27662883	27663145	10.8577	-0.0397179	0.302953	0.726442	0.952012	10.8577	-0.0770425	0.305477	0.43674	0.836966	10.8577	-0.0506864	0.319427	0.670597	0.938627
chr1	27671979	27672149	8.95446	0.123751	0.37145	0.330336	0.786397	8.95446	-0.0597413	0.317187	0.539483	0.883495	8.95446	-0.27765	0.529988	0.115927	0.505193
chr1	27672433	27672735	16.2011	0.393045	0.52488	0.042397	0.31622	16.2011	-0.12787	0.340337	0.245314	0.709416	16.2011	-1.24706	0.784132	0.00185114	0.0345162
chr1	27726069	27726268	12.5746	0.0193397	0.297691	0.863146	0.982151	12.5746	-0.0222867	0.271085	0.80713	0.959015	12.5746	-0.0491896	0.314267	0.677429	0.940297
chr1	27830393	27830684	15.598	0.103483	0.31641	0.395052	0.830598	15.598	0.122025	0.320601	0.256845	0.72051	15.598	0.0308085	0.273965	0.779471	0.961614
chr1	27830817	27831200	21.5712	-0.0969809	0.286007	0.416083	0.842856	21.5712	0.114303	0.274927	0.26898	0.731704	21.5712	0.362436	0.488059	0.0576833	0.343875
chr1	27850928	27851169	3.22625	-0.0997337	0.446016	0.378932	NA	3.22625	-0.0834408	0.421482	0.40764	NA	3.22625	0.00748881	0.439475	0.949834	NA
chr1	27872605	27872786	4.3726	-0.0816137	0.40972	0.479986	NA	4.3726	-0.0358894	0.354212	0.707102	NA	4.3726	0.0420577	0.413413	0.735726	NA
chr1	28087929	28088234	13.8813	0.432345	0.588693	0.0361263	0.288055	13.8813	0.163264	0.384305	0.174179	0.638168	13.8813	-0.0939936	0.31911	0.440991	0.848685
chr1	28088336	28088542	14.1627	0.0254799	0.279321	0.819869	0.973021	14.1627	-0.0367087	0.25884	0.688842	0.932955	14.1627	-0.0740759	0.305795	0.530532	0.892153
chr1	28232602	28232953	14.9366	-0.00485874	0.273728	0.965132	0.996009	14.9366	-0.0450702	0.258693	0.625924	0.914307	14.9366	-0.0501023	0.287763	0.658669	0.935831
chr1	28235160	28235367	9.04948	-0.307455	0.550962	0.0751195	0.430519	9.04948	-0.0444728	0.291143	0.636627	0.917138	9.04948	0.212772	0.484078	0.181202	0.625004
chr1	28235463	28235890	25.9314	0.115005	0.281927	0.344248	0.797045	25.9314	-0.012868	0.224444	0.886189	0.977257	25.9314	-0.135	0.309309	0.275748	0.735383
chr1	28236163	28236632	29.36	0.00823825	0.231946	0.941008	0.992733	29.36	-0.0497936	0.218431	0.592598	0.902292	29.36	-0.0624882	0.237331	0.54357	0.89849
chr1	28246891	28247160	22.1345	0.298874	0.416404	0.069416	0.413559	22.1345	-0.0271857	0.232933	0.763715	0.951906	22.1345	-0.455094	0.530503	0.0346249	0.253638
chr1	28247602	28247945	19.9016	0.19255	0.356642	0.167555	0.620865	19.9016	-0.0114884	0.237918	0.89801	0.979067	19.9016	-0.235649	0.411523	0.131195	0.53808
chr1	28248034	28248491	25.8917	1.80738	0.549431	2.6173e-05	0.00135542	25.8917	0.0585507	0.247948	0.532033	0.88024	25.8917	-1.48568	0.575149	0.000235086	0.007114
chr1	28259580	28259786	11.1207	0.0528124	0.308788	0.645625	0.930175	11.1207	-0.00454977	0.269091	0.959956	0.990575	11.1207	-0.061256	0.320528	0.60952	0.921312
chr1	28329037	28329268	17.7995	-0.0366777	0.268284	0.743836	0.956615	17.7995	0.00317611	0.234524	0.971681	0.993583	17.7995	0.0393897	0.266151	0.716764	0.947047
chr1	28369662	28370523	85.817	0.198324	0.213101	0.116603	0.534486	85.817	0.166594	0.197245	0.123884	0.560884	85.817	-0.00317252	0.151182	0.968589	0.996048
chr1	28437545	28437962	21.3766	-0.0435762	0.258316	0.698637	0.944746	21.3766	0.026176	0.227014	0.772388	0.952693	21.3766	0.0748556	0.27024	0.499652	0.879462
chr1	28505155	28505862	80.2924	0.0932813	0.192169	0.425723	0.847718	80.2924	0.0271622	0.171968	0.781138	0.953194	80.2924	-0.0442175	0.164465	0.601802	0.919868
chr1	28506075	28510536	560.385	-0.116759	0.106409	0.206829	0.674111	560.385	-0.109193	0.102917	0.206898	0.673629	560.385	0.000417868	0.0829328	0.994117	0.998572
chr1	28512255	28512515	9.35864	-0.228137	0.469822	0.134144	0.567423	9.35864	-0.103222	0.342434	0.328433	0.776636	9.35864	0.0682665	0.354141	0.585411	0.914521
chr1	28518226	28518533	46.3968	-0.0237552	0.211234	0.833452	0.976536	46.3968	0.0424965	0.193615	0.654485	0.922618	46.3968	0.0624339	0.204428	0.511731	0.885035
chr1	28527342	28527608	3.20681	0.00600864	0.397605	0.95494	NA	3.20681	-0.0568347	0.404668	0.552822	NA	3.20681	-0.0807512	0.46307	0.518298	NA
chr1	28552341	28552825	28.3173	-0.158319	0.298259	0.22034	0.689908	28.3173	-0.0899752	0.242674	0.359586	0.797456	28.3173	0.032259	0.234564	0.75004	0.954328
chr1	28553138	28553833	42.2488	0.0683934	0.222322	0.552007	0.901786	42.2488	0.010993	0.195735	0.90584	0.980248	42.2488	-0.0449497	0.202556	0.632388	0.92746
chr1	28579205	28579390	6.89831	-0.072515	0.35415	0.53851	0.895893	6.89831	-0.281136	0.58689	0.0721839	0.439931	6.89831	-0.183108	0.484546	0.226814	0.682945
chr1	28580622	28580792	5.46732	-0.156625	0.449691	0.236717	NA	5.46732	-0.16977	0.474899	0.172083	0.636248	5.46732	-0.0221989	0.390715	0.85773	0.977946
chr1	28581068	28581817	72.3385	0.0705034	0.19442	0.542971	0.897892	72.3385	-0.0757	0.183232	0.445052	0.840975	72.3385	-0.148066	0.228986	0.170571	0.608765
chr1	28582074	28582947	66.439	-0.0266977	0.19435	0.815187	0.971988	66.439	-0.0554471	0.181897	0.570227	0.896201	66.439	-0.0284499	0.171226	0.740462	0.952834
chr1	28583129	28583299	11.603	-0.105939	0.336688	0.388896	0.826126	11.603	-0.0552599	0.279933	0.55926	0.891855	11.603	0.0330983	0.305885	0.775773	0.960206
chr1	28642664	28643016	27.2949	0.227915	0.350323	0.116436	0.534151	27.2949	0.185234	0.323182	0.121559	0.557452	27.2949	-0.00292212	0.221405	0.976166	0.996681
chr1	28643229	28643956	72.765	0.139444	0.208022	0.249343	0.717903	72.765	0.127518	0.194525	0.219687	0.686419	72.765	0.00569754	0.160202	0.945164	0.991782
chr1	28647453	28647726	7.89961	-0.235511	0.49955	0.12456	0.549829	7.89961	-0.0655362	0.321428	0.505231	0.869485	7.89961	0.123384	0.416278	0.369193	0.806409
chr1	28647943	28648589	61.3711	-0.0267224	0.197045	0.814765	0.971988	61.3711	0.0161824	0.179478	0.866336	0.973853	61.3711	0.0349992	0.174995	0.687426	0.941747
chr1	28648881	28649695	41.9148	-0.380952	0.383459	0.0283234	0.246842	41.9148	-0.448836	0.44285	0.0129353	0.166908	41.9148	-0.0262551	0.204438	0.779839	0.961654
chr1	28668039	28668712	69.0138	0.0157299	0.19163	0.890421	0.98746	69.0138	0.0225075	0.176143	0.816373	0.960807	69.0138	0.0078025	0.163643	0.925729	0.988113
chr1	28669102	28669885	103.469	0.280381	0.225831	0.0374576	0.294463	103.469	0.255653	0.219257	0.0326206	0.292476	103.469	0.00351597	0.142531	0.964203	0.995725
chr1	28736083	28736752	58.5419	0.0411393	0.202124	0.718725	0.950813	58.5419	0.0821196	0.192561	0.406263	0.823628	58.5419	0.0413379	0.180662	0.640686	0.930167
chr1	28736964	28737990	106.963	0.142714	0.188099	0.232915	0.702712	106.963	0.0632088	0.166167	0.526892	0.878169	106.963	-0.0463949	0.153468	0.571952	0.908761
chr1	28884557	28884885	22.4002	0.0348973	0.2522	0.755186	0.959476	22.4002	-0.0337483	0.230072	0.710716	0.938988	22.4002	-0.0753634	0.268359	0.495259	0.878008
chr1	28887207	28887424	16.177	-0.0360116	0.275182	0.748616	0.957227	16.177	-0.0449152	0.253799	0.626389	0.91435	16.177	-0.0178812	0.271182	0.869958	0.97956
chr1	29122893	29123073	5.30581	-0.167427	0.466265	0.211348	NA	5.30581	-0.121971	0.418657	0.27551	0.737192	5.30581	0.0221228	0.393325	0.858187	0.977946
chr1	29124275	29124878	40.2393	-0.133554	0.247191	0.275295	0.740573	40.2393	-0.021163	0.195635	0.820562	0.962241	40.2393	0.0895231	0.231483	0.385157	0.81485
chr1	29124971	29125188	10.7514	-0.100186	0.345697	0.412642	0.841307	10.7514	0.0156361	0.268049	0.863315	0.973228	10.7514	0.135343	0.386429	0.322551	0.77563
chr1	29181066	29181877	123.756	0.242616	0.201418	0.0570788	0.374561	123.756	0.190319	0.183782	0.0819655	0.468346	123.756	-0.0133709	0.137692	0.862361	0.978431
chr1	29182177	29182963	99.2441	0.0942478	0.180821	0.419089	0.84421	99.2441	0.059015	0.165458	0.554122	0.889549	99.2441	-0.0175322	0.146356	0.82538	0.972437
chr1	29230690	29230860	9.61932	0.0381098	0.322428	0.737853	0.95501	9.61932	0.057676	0.305884	0.549908	0.888466	9.61932	0.0310721	0.324169	0.794089	0.965893
chr1	3068647	3068997	15.9025	0.101493	0.301568	0.400199	0.834382	15.9025	-0.111228	0.310434	0.289418	0.74929	15.9025	-0.376337	0.535626	0.0595817	0.350334
chr1	3069511	3070194	52.0405	0.18355	0.244817	0.152708	0.598947	52.0405	-0.116753	0.214535	0.253963	0.718868	52.0405	-0.551094	0.42866	0.0104566	0.117234
chr1	3070590	3070985	18.8806	-0.0403097	0.267223	0.720033	0.951438	18.8806	-0.0906338	0.275955	0.3621	0.799125	18.8806	-0.0618205	0.280321	0.582291	0.913462
chr1	30717697	30718027	13.7086	-0.0390847	0.284628	0.729141	0.952386	13.7086	-0.129953	0.338024	0.238709	0.703217	13.7086	-0.104654	0.337015	0.406391	0.827371
chr1	30718801	30719347	58.5346	-0.0823115	0.204879	0.479761	0.871746	58.5346	-0.173209	0.229032	0.118074	0.549663	58.5346	-0.0813054	0.201657	0.395204	0.820423
chr1	30824182	30824419	16.5802	0.693099	0.681611	0.0103474	0.130764	16.5802	-0.105778	0.323584	0.313268	0.765972	16.5802	-1.5614	0.771099	0.00052229	0.0132296
chr1	31061197	31061469	4.78146	-0.109154	0.420439	0.368521	NA	4.78146	-0.210007	0.548624	0.114509	0.54203	4.78146	-0.0922362	0.447845	0.478333	0.869683
chr1	31063425	31063730	13.2036	-0.00762759	0.282816	0.945429	0.993485	13.2036	-0.151717	0.370399	0.194013	0.660086	13.2036	-0.179971	0.409601	0.219558	0.674475
chr1	31064435	31064732	17.6062	0.072838	0.286235	0.530674	0.893698	17.6062	-0.142071	0.340866	0.207895	0.674785	17.6062	-0.372197	0.534758	0.0611606	0.35659
chr1	31064861	31065625	56.8563	0.0390308	0.201413	0.732479	0.953499	56.8563	-0.0204693	0.183829	0.830162	0.965312	56.8563	-0.050137	0.185688	0.577975	0.911888
chr1	31065902	31066286	41.3004	0.0822955	0.229511	0.478583	0.87115	41.3004	0.0533708	0.204197	0.572667	0.896571	41.3004	-0.0135898	0.196088	0.882201	0.981165
chr1	31154458	31154892	39.4936	0.206173	0.286959	0.127724	0.555818	39.4936	0.0603898	0.207706	0.525224	0.877592	39.4936	-0.092785	0.23199	0.369709	0.80641
chr1	31155217	31155814	43.6253	0.0777982	0.221757	0.501754	0.881029	43.6253	0.0180455	0.194216	0.846824	0.969194	43.6253	-0.0448042	0.199141	0.630485	0.926581
chr1	31296294	31296722	36.0046	0.163611	0.277166	0.202572	0.66976	36.0046	0.158345	0.269641	0.153138	0.609234	36.0046	0.0138393	0.203219	0.882276	0.981165
chr1	31297146	31297388	19.6353	0.242913	0.398578	0.110907	0.520512	19.6353	0.0965523	0.279321	0.337142	0.782162	19.6353	-0.0724773	0.274689	0.516522	0.886768
chr1	31644088	31644896	78.1888	0.0763808	0.190022	0.510954	0.885729	78.1888	0.0140536	0.171543	0.885433	0.977257	78.1888	-0.0436913	0.164694	0.606285	0.920842
chr1	31714664	31715041	30.7682	-0.0702237	0.243226	0.540974	0.896713	30.7682	-0.0639554	0.222118	0.499044	0.866372	30.7682	-0.00586054	0.218048	0.951826	0.992975
chr1	31715402	31715751	24.4233	-0.0669021	0.254391	0.559376	0.905407	24.4233	-0.12437	0.275958	0.23724	0.702156	24.4233	-0.0636572	0.255765	0.552404	0.901754
chr1	31788416	31788587	9.65095	-0.0309199	0.314998	0.784788	0.965954	9.65095	-0.0397968	0.291543	0.671128	0.928438	9.65095	-0.0176971	0.322706	0.881254	0.98093
chr1	31788831	31789251	24.8425	0.113071	0.273003	0.349586	0.799761	24.8425	-0.0566187	0.233383	0.544272	0.885679	24.8425	-0.23016	0.378233	0.123951	0.522463
chr1	31798408	31798637	6.39033	-0.568255	0.795224	0.0133673	NA	6.39033	-0.65123	0.912863	0.0101979	0.145349	6.39033	-0.00929537	0.408295	0.939658	0.991135
chr1	31933029	31933425	14.4828	-0.252051	0.43452	0.108228	0.515161	14.4828	-0.415378	0.598312	0.0312303	0.286644	14.4828	-0.0657393	0.3124	0.580049	0.911961
chr1	31933955	31934485	18.1781	-0.186036	0.369768	0.181609	0.641618	18.1781	-0.247006	0.439815	0.0823243	0.469371	18.1781	-0.0450499	0.287341	0.690519	0.94187
chr1	31934990	31935236	19.1707	-0.0602561	0.268361	0.597781	0.919023	19.1707	-0.173521	0.347488	0.146187	0.597719	19.1707	-0.113493	0.314679	0.355472	0.798491
chr1	31935360	31935602	12.4265	-0.0113401	0.286118	0.919067	0.99089	12.4265	-0.108771	0.326804	0.303169	0.759101	12.4265	-0.121666	0.359877	0.354738	0.797888
chr1	31935813	31936469	24.5561	-0.0992044	0.26664	0.403428	0.835979	24.5561	-0.346229	0.467174	0.0360549	0.308303	24.5561	-0.169234	0.340028	0.206068	0.657863
chr1	31937589	31938325	56.7837	-0.0325561	0.199867	0.775292	0.963551	56.7837	-0.0995111	0.198106	0.322135	0.773445	56.7837	-0.0648681	0.193026	0.483532	0.871762
chr1	31938627	31939851	84.131	0.118857	0.191749	0.316167	0.775182	84.131	-0.0357099	0.1702	0.716405	0.939047	84.131	-0.140609	0.209898	0.171783	0.610029
chr1	31940119	31940289	10.6212	0.0658049	0.315974	0.572124	0.910703	10.6212	-0.0494913	0.290526	0.60091	0.904387	10.6212	-0.152749	0.398992	0.278377	0.737719
chr1	31943992	31944226	9.79973	-0.245161	0.48161	0.117869	0.537289	9.79973	-0.0882053	0.322604	0.38649	0.813116	9.79973	0.093631	0.367888	0.468801	0.863044
chr1	31944574	31944979	38.3522	-0.11138	0.24532	0.351641	0.800651	38.3522	-0.0374975	0.203008	0.687612	0.932666	38.3522	0.0521567	0.217194	0.593529	0.917513
chr1	31945089	31945320	14.6832	-0.0459384	0.283574	0.685316	0.940765	14.6832	-0.108999	0.311066	0.297573	0.755027	14.6832	-0.0753316	0.309096	0.526018	0.889959
chr1	31955348	31955746	21.6518	0.0996045	0.283052	0.404468	0.836506	21.6518	-0.0386307	0.238278	0.672385	0.929071	21.6518	-0.170851	0.351553	0.209641	0.662236
chr1	31955813	31955989	8.99295	-0.00282023	0.309325	0.979934	0.998586	8.99295	-0.307936	0.591344	0.0615715	0.409224	8.99295	-0.373055	0.62397	0.0656547	0.371294
chr1	32012988	32013619	56.6917	0.246452	0.277949	0.0776294	0.437746	56.6917	0.557642	0.434621	0.00466083	0.0861376	56.6917	0.107583	0.215467	0.286237	0.743574
chr1	32013858	32014723	110.454	0.156056	0.18513	0.193388	0.657841	110.454	-0.0146802	0.160648	0.882084	0.977257	110.454	-0.14566	0.196649	0.146671	0.567639
chr1	32072227	32072490	19.2003	0.0207211	0.26145	0.852284	0.980307	19.2003	-0.00305342	0.233635	0.972776	0.993583	19.2003	-0.0234128	0.256112	0.825256	0.972425
chr1	32072956	32073205	29.051	-0.0408778	0.242193	0.716023	0.949841	29.051	0.153141	0.280137	0.166126	0.627959	29.051	0.279866	0.397305	0.0824215	0.421286
chr1	32073327	32073497	9.34736	0.0608143	0.330323	0.600864	0.919725	9.34736	0.0192808	0.286861	0.834128	0.966262	9.34736	-0.0378592	0.327045	0.751835	0.954401
chr1	32107417	32107899	28.4412	-0.111231	0.263881	0.35487	0.803233	28.4412	-0.0943509	0.240844	0.340011	0.783403	28.4412	-0.00217976	0.222878	0.982283	0.997292
chr1	32108079	32108537	40.6769	0.509867	0.452244	0.0129813	0.151708	40.6769	0.0522075	0.208483	0.578889	0.898087	40.6769	-0.32407	0.385109	0.0514035	0.321401
chr1	32179180	32179606	39.7805	0.0531956	0.223363	0.640109	0.928123	39.7805	0.0855833	0.214513	0.381995	0.810053	39.7805	0.0377659	0.202402	0.686917	0.941653
chr1	32179717	32180614	103.311	0.190075	0.195792	0.123509	0.547322	103.311	0.149611	0.179169	0.157132	0.614968	103.311	-0.0105144	0.142529	0.893291	0.982424
chr1	32200685	32200988	14.1638	0.0776636	0.298012	0.507703	0.884134	14.1638	-0.137415	0.350126	0.222189	0.688395	14.1638	-0.375389	0.553971	0.0622135	0.35977
chr1	32222530	32222885	24.6727	0.0303597	0.244887	0.785777	0.966007	24.6727	0.0128714	0.21868	0.886548	0.977257	24.6727	-0.0130247	0.229823	0.896234	0.982939
chr1	32291449	32291815	31.9356	-0.0722557	0.242848	0.530067	0.893427	31.9356	0.104717	0.235841	0.297436	0.755027	31.9356	0.249584	0.365637	0.0968834	0.460207
chr1	32292143	32292658	44.0868	-0.000180549	0.214025	0.998718	0.999816	44.0868	0.027654	0.195299	0.76786	0.95223	44.0868	0.0271066	0.194914	0.767359	0.95797
chr1	32334686	32334927	11.6164	0.0810693	0.316084	0.49363	0.879056	11.6164	-0.0694418	0.298818	0.476627	0.858661	11.6164	-0.219849	0.45048	0.165229	0.600118
chr1	32335097	32336084	68.8892	0.209073	0.233288	0.107419	0.513021	68.8892	-0.0495795	0.181119	0.610649	0.909265	68.8892	-0.325703	0.322587	0.0340876	0.251163
chr1	32351226	32351468	15.8863	-0.067707	0.295283	0.559231	0.905221	15.8863	0.0163914	0.246663	0.855394	0.971199	15.8863	0.0930898	0.317396	0.443956	0.849913
chr1	32351631	32352002	36.0706	0.0837846	0.236287	0.47116	0.867482	36.0706	0.0528761	0.209057	0.574123	0.896916	36.0706	-0.0151791	0.20272	0.870827	0.97956
chr1	32352081	32352364	13.9435	0.0522722	0.29399	0.6474	0.930409	13.9435	0.021281	0.257248	0.814176	0.960333	13.9435	-0.0251579	0.28467	0.822396	0.971677
chr1	32394009	32394367	25.6164	0.147285	0.292059	0.246252	0.715238	25.6164	-0.000101137	0.218563	0.999103	0.999807	25.6164	-0.144889	0.306945	0.244312	0.703515
chr1	32394798	32395162	37.6125	0.028836	0.222499	0.797546	0.968269	37.6125	-0.0111589	0.200874	0.903566	0.980144	37.6125	-0.0359063	0.20819	0.705599	0.944602
chr1	32500061	32500756	37.2718	-0.000607694	0.21834	0.995673	0.999149	37.2718	-0.144107	0.25305	0.180148	0.643698	37.2718	-0.164597	0.292394	0.183425	0.628323
chr1	32520767	32520955	4.91423	-0.187364	0.499258	0.168277	NA	4.91423	-0.047863	0.346225	0.621431	0.913171	4.91423	0.125067	0.464602	0.360185	0.800209
chr1	32611937	32612186	19.9867	0.10619	0.292466	0.379619	0.819944	19.9867	0.0429933	0.241184	0.63953	0.917899	19.9867	-0.0443938	0.258124	0.678088	0.940601
chr1	32612411	32612887	38.4961	-0.0295533	0.221476	0.792785	0.967381	38.4961	-0.00783215	0.198771	0.932419	0.985226	38.4961	0.0166349	0.201449	0.858121	0.977946
chr1	32649888	32650453	35.6314	-0.0770909	0.238353	0.504752	0.88227	35.6314	-0.00489266	0.202861	0.957443	0.989381	35.6314	0.061821	0.227186	0.53839	0.89606
chr1	32650534	32650953	86.7807	-0.0392644	0.183055	0.732499	0.953499	86.7807	0.103438	0.176263	0.310165	0.764535	86.7807	0.137546	0.206269	0.176371	0.617502
chr1	32651243	32651939	87.9365	0.137464	0.197692	0.252728	0.721257	87.9365	0.225973	0.221909	0.0531825	0.381032	87.9365	0.0682332	0.169275	0.433433	0.844131
chr1	32702444	32703140	40.6164	0.816339	0.522578	0.00246003	0.0486198	40.6164	-0.112429	0.241613	0.26962	0.731968	40.6164	-1.49825	0.452648	4.38389e-05	0.0018262
chr1	32742160	32742338	10.819	0.161305	0.389883	0.233206	0.702741	10.819	0.0411932	0.284976	0.659389	0.924251	10.819	-0.0962414	0.344223	0.446395	0.85032
chr1	32816589	32816764	8.00226	0.327588	0.598356	0.0613858	0.389591	8.00226	0.159314	0.453868	0.190527	0.656664	8.00226	-0.0767159	0.372242	0.548244	0.899883
chr1	32816775	32817321	49.1933	0.0262694	0.212859	0.816067	0.97207	49.1933	0.116106	0.218628	0.256061	0.720176	49.1933	0.0907015	0.22144	0.368559	0.806148
chr1	32817601	32818848	156.203	0.0832127	0.158509	0.463718	0.865201	156.203	0.0518524	0.147649	0.60328	0.905858	156.203	-0.0160624	0.12691	0.828416	0.973457
chr1	32964582	32964825	17.1113	0.0951464	0.306919	0.427808	0.848242	17.1113	0.096111	0.29294	0.342704	0.785462	17.1113	0.0165136	0.267686	0.878997	0.980889
chr1	33033208	33033499	5.41356	-0.0315768	0.366801	0.778319	NA	5.41356	-0.143592	0.461703	0.217801	0.684097	5.41356	-0.132311	0.467864	0.338971	0.787011
chr1	33036197	33036836	49.7997	0.055225	0.212984	0.629203	0.926392	49.7997	0.156968	0.235022	0.148945	0.602302	49.7997	0.0963824	0.219575	0.339362	0.787336
chr1	33080856	33081035	6.58861	-0.0272045	0.343672	0.809738	0.971027	6.58861	0.00435009	0.305601	0.96257	0.99103	6.58861	0.0354822	0.360226	0.773589	0.959382
chr1	33081213	33081499	19.3378	0.0989536	0.295778	0.409565	0.838811	19.3378	0.0670856	0.259091	0.480786	0.860174	19.3378	-0.0131113	0.254665	0.901187	0.983609
chr1	33096373	33096526	6.70191	0.0463807	0.39259	0.676136	0.938069	6.70191	0.542605	0.85138	0.0153467	0.185203	6.70191	0.453254	0.727111	0.0384042	0.270823
chr1	33097335	33099365	178.429	-0.266302	0.190742	0.0350561	0.282435	178.429	0.233238	0.175246	0.0357874	0.307431	178.429	0.83711	0.241294	2.86329e-05	0.00129471
chr1	33099631	33101024	137.265	-0.35292	0.226769	0.0115569	0.14051	137.265	0.163958	0.165318	0.120654	0.555678	137.265	0.853939	0.259292	5.02341e-05	0.00202362
chr1	33101164	33101334	7.30702	-0.253376	0.546125	0.100754	0.497987	7.30702	0.0805493	0.338445	0.427402	0.833652	7.30702	0.594501	0.813673	0.019596	0.177781
chr1	33126732	33127254	31.1655	-0.203369	0.316285	0.140046	0.577801	31.1655	-0.0313888	0.209736	0.732995	0.94389	31.1655	0.137662	0.291818	0.253465	0.712994
chr1	3312957	3313210	13.6431	-0.0212335	0.292131	0.849771	0.98016	13.6431	0.192242	0.399436	0.131053	0.571746	13.6431	0.304926	0.502187	0.0921835	0.448621
chr1	3313445	3313953	36.5434	-0.14805	0.266773	0.237975	0.708208	36.5434	0.069839	0.210814	0.466819	0.852643	36.5434	0.317258	0.394883	0.0575491	0.343464
chr1	33255754	33256159	38.8552	0.178634	0.274751	0.170533	0.626278	38.8552	0.134894	0.243765	0.201494	0.668332	38.8552	-0.00927621	0.195395	0.919255	0.98698
chr1	33257089	33257291	14.4448	0.373824	0.549149	0.049979	0.346689	14.4448	0.126871	0.346264	0.249927	0.714112	14.4448	-0.104843	0.331026	0.401787	0.824303
chr1	33338685	33338855	3.0453	0.00456925	0.400225	0.965537	NA	3.0453	-0.0244951	0.382024	0.792073	NA	3.0453	-0.0370974	0.437794	0.760047	NA
chr1	33348938	33349751	51.154	-0.174176	0.248991	0.172258	0.628099	51.154	-0.104906	0.208169	0.298032	0.755581	51.154	0.0301929	0.189705	0.738471	0.951878
chr1	33350092	33350386	23.5404	-0.108737	0.283636	0.367982	0.812288	23.5404	0.0881727	0.248139	0.368346	0.802266	23.5404	0.312326	0.444288	0.0740152	0.397847
chr1	3471568	3471756	4.922	-0.0802149	0.387701	0.495849	NA	4.922	-0.308653	0.663907	0.0516132	0.374664	4.922	-0.201018	0.544156	0.183102	0.62797
chr1	34763154	34763299	5.41885	-0.249028	0.57848	0.0841621	NA	5.41885	0.0542963	0.340487	0.578165	0.89805	5.41885	0.449952	0.768395	0.0296237	0.23142
chr1	34763523	34763956	9.74408	-0.312062	0.557799	0.0725723	0.421776	9.74408	0.00727012	0.274458	0.936297	0.985585	9.74408	0.386307	0.62817	0.061316	0.356854
chr1	34781395	34781635	6.25663	-0.0339586	0.355885	0.763922	NA	6.25663	0.0240401	0.317652	0.798	0.956134	6.25663	0.0709332	0.388599	0.57993	0.911961
chr1	34859364	34859750	27.2827	0.05906	0.247781	0.603746	0.920293	27.2827	0.0332195	0.219154	0.716243	0.939047	27.2827	-0.0155994	0.224791	0.874407	0.979781
chr1	34859993	34860165	11.9716	-0.0854876	0.325301	0.473941	0.869096	11.9716	0.0453522	0.270498	0.625926	0.914307	11.9716	0.173777	0.407207	0.231618	0.689144
chr1	34866216	34866455	12.1746	0.00447833	0.289645	0.967993	0.996621	12.1746	-0.0261889	0.265695	0.774041	0.952717	12.1746	-0.0376907	0.301161	0.744212	0.95352
chr1	34984998	34985686	46.8223	-0.110795	0.22795	0.352164	0.801435	46.8223	0.00439345	0.189037	0.962748	0.991045	46.8223	0.100947	0.2279	0.327722	0.779878
chr1	35030990	35032091	95.0495	0.0716407	0.182438	0.536303	0.895336	95.0495	0.14354	0.183509	0.173229	0.637605	95.0495	0.0628953	0.163036	0.460764	0.858864
chr1	35078934	35079233	24.0531	-0.0180108	0.245916	0.871287	0.984095	24.0531	0.0139648	0.219788	0.876941	0.976381	24.0531	0.0323264	0.238293	0.751608	0.954401
chr1	35079445	35079769	23.8324	0.0400032	0.254437	0.721583	0.951459	23.8324	-0.00801158	0.225455	0.928854	0.984358	23.8324	-0.0470965	0.251871	0.655704	0.935364
chr1	35079788	35079985	13.9513	0.572499	0.67857	0.0184094	0.189371	13.9513	0.0950486	0.321769	0.355804	0.79464	13.9513	-0.241813	0.45405	0.138114	0.552053
chr1	35080157	35080327	6.00021	-0.0624965	0.367899	0.589852	NA	6.00021	-0.0698377	0.354757	0.486334	0.862141	6.00021	-0.0189913	0.374072	0.877682	0.980441
chr1	35191752	35191952	7.00619	-0.134939	0.405343	0.296789	0.75694	7.00619	-0.114589	0.380876	0.29614	0.754457	7.00619	0.00100389	0.354558	0.993429	0.998461
chr1	35192093	35193111	103.548	0.0119505	0.173137	0.916758	0.990483	103.548	0.0317145	0.16098	0.749239	0.94824	103.548	0.0168455	0.14405	0.830839	0.974049
chr1	35193400	35194137	49.7071	-0.0611466	0.214327	0.593998	0.918248	49.7071	0.188303	0.249698	0.099729	0.509437	49.7071	0.379579	0.382548	0.0304129	0.234414
chr1	35268734	35269327	68.6304	0.12532	0.207274	0.295705	0.756269	68.6304	0.102656	0.189715	0.31077	0.764943	68.6304	-0.00319362	0.162671	0.969468	0.996048
[truncated: 30,004 more rows]

## Sheet: Table 3-RNA-seq data (1W, Res)
		SCH772984 (1µM) for 1 Week vs. DMSO (1:1,000)								SCH772984 (1µM) Resistant vs. DMSO (1:1,000)
		SW1573		SW620		MIA MaCa-2		CFPAC-1		SW1573		SW620		MIA MaCa-2		CFPAC-1
GeneID	GeneName	Log2FC	pvalue	Log2FC	pvalue	Log2FC	pvalue	Log2FC	pvalue	Log2FC	pvalue	Log2FC	pvalue	Log2FC	pvalue	Log2FC	pvalue
ENSG00000000003	TSPAN6	0.509795	0.00333274	0.19425	0.249782	1.93756	0.014838	0.298305	0.0802501	0.655	0.000156427	-1.42131	6.89227e-17	-4.11683	0.00326415	0.133008	0.435059
ENSG00000000419	DPM1	-0.144291	0.0843686	-0.820293	2.42895e-25	0.239664	0.00251368	-0.521798	2.24656e-10	0.280546	0.000610845	-0.48959	2.30178e-10	0.241269	0.00229505	0.0888837	0.262407
ENSG00000000457	SCYL3	0.200123	0.16129	0.429169	0.00181186	0.294165	0.0101577	0.085284	0.526452	-0.842177	2.76327e-08	0.493036	0.000279898	0.604482	6.87996e-08	-0.307346	0.0231376
ENSG00000000460	C1orf112	-0.407026	0.000651832	-1.14108	2.81335e-27	0.476865	1.52554e-06	-1.58665	9.15633e-47	0.308766	0.00561342	-0.842742	3.89227e-17	1.11752	1.03922e-31	-0.649354	4.54991e-11
ENSG00000000938	FGR	X	X	X	X	2.38013	0.000895707	X	X	X	X	X	X	-1.27215	0.200411	X	X
ENSG00000000971	CFH	6.24983	6.85076e-06	0	1	1.29014	2.42952e-72	1.44223	0.0454791	3.28354	0.0227943	0	1	-0.0531372	0.47108	1.79038	0.0130161
ENSG00000001036	FUCA2	0.105918	0.188188	-0.461956	4.07714e-10	0.000617753	0.99374	-0.277121	0.000265212	0.771474	9.98033e-23	-0.313772	1.86943e-05	0.0763096	0.331588	-0.0387702	0.605119
ENSG00000001084	GCLC	0.980458	1.24679e-11	-0.365879	0.0106534	-0.0495944	0.554773	0.0653337	0.648301	0.520509	0.000335572	-0.56085	8.90061e-05	0.609389	4.22678e-14	0.705423	7.24665e-07
ENSG00000001167	NFYA	-0.239132	0.0220849	-0.521863	2.64335e-08	-0.156451	0.0249154	-0.270119	0.00441622	0.232625	0.0222678	-0.141525	0.125629	0.568905	4.22342e-17	-0.554725	5.07964e-09
ENSG00000001460	STPG1	0.025568	0.871619	0.33705	0.0389843	-0.310946	0.0147361	0.212849	0.157664	-0.373265	0.0197178	0.538096	0.000772878	-0.577686	7.22961e-06	0.557123	0.000178082
ENSG00000001461	NIPAL3	1.28275	1.7804e-17	1.45936	4.46723e-22	0.0762895	0.342983	0.68777	3.62152e-06	0.221963	0.143511	1.5135	1.05957e-23	-0.590917	9.17764e-13	0.485493	0.00107405
ENSG00000001497	LAS1L	-0.465063	2.91025e-14	-0.526532	5.82189e-19	-0.0116009	0.838247	-0.755749	1.27955e-29	-0.12162	0.0434624	-0.536068	6.51264e-20	0.771103	1.00762e-43	0.0747531	0.232934
ENSG00000001561	ENPP4	0.708045	1.92731e-05	0.0451032	0.788379	X	X	0.195199	0.234099	0.341999	0.0395442	0.574014	0.00054435	X	X	0.0900856	0.582282
ENSG00000001617	SEMA3F	3.00364	2.95998e-16	1.6964	8.47268e-11	0.172943	0.0495785	1.16224	0.00179978	-3.3141	3.85055e-05	-2.41737	4.51883e-20	-0.887064	3.00517e-21	2.17273	6.17263e-10
ENSG00000001626	CFTR	2.12316	0.141417	-4.03546	0.00869744	X	X	3.89852	1.17883e-05	1.82584	0.209463	-4.34062	0.00477061	X	X	0.99452	0.264009
ENSG00000001629	ANKIB1	0.230245	0.046725	0.21165	0.0707871	-0.103107	0.112457	0.142339	0.221298	0.0414646	0.720381	0.598085	2.74401e-07	0.493027	1.78315e-14	0.145437	0.210192
ENSG00000001630	CYP51A1	-0.00392462	0.98129	0.190103	0.267649	-1.98679	1.47545e-26	-0.184379	0.245536	-0.809946	4.32602e-06	1.29849	5.29037e-16	-0.648287	0.000130862	-0.414135	0.0089068
ENSG00000001631	KRIT1	-0.12431	0.220904	0.0422204	0.671034	-0.278042	3.5645e-05	0.088601	0.390411	-0.272317	0.00739688	0.464639	2.07781e-06	0.203174	0.00197921	-0.316743	0.00225363
ENSG00000002016	RAD52	-0.158599	0.245938	0.391967	0.0011838	0.696303	1.84409e-17	0.635695	3.98515e-06	0.353585	0.00757015	-0.457703	0.000199133	-0.164011	0.0501537	0.0469598	0.738181
ENSG00000002079	MYH16	-8.75383	8.73456e-11	-0.0643647	0.928271	-2.90313	4.82528e-82	-1.88337	0.00775927	-1.36896	0.0399193	-4.87032	7.51044e-05	0.743416	7.60296e-14	0.388311	0.563159
ENSG00000002330	BAD	0.455034	0.00113503	0.469172	0.00124281	0.277634	0.00122673	0.338004	0.0171154	0.39275	0.00495103	1.41735	3.34353e-23	-0.16646	0.0554552	-0.15713	0.269285
ENSG00000002549	LAP3	0.37747	0.0203233	-0.608171	0.000183858	0.0618387	0.413606	0.919738	1.24205e-08	1.48671	4.00146e-20	-0.580762	0.000340881	0.599777	5.97197e-16	0.49543	0.00217711
ENSG00000002586	CD99	0.28586	0.0179797	-0.287288	0.0182595	0.451019	7.55861e-13	-0.924829	1.63622e-14	-0.0193082	0.873149	-2.71406	2.77632e-101	-0.13064	0.0387883	-0.531562	9.57598e-06
ENSG00000002587	HS3ST1	0	1	3.13895	3.86195e-08	X	X	-0.569606	0.0241398	2.97747	0.0293226	5.13731	7.23726e-21	X	X	-1.29772	2.94396e-07
ENSG00000002726	AOC1	3.08687	0.034905	4.39179	4.5344e-14	X	X	1.60168	0.00620463	1.67132	0.3139	-0.560329	0.338223	X	X	-0.528069	0.370321
ENSG00000002745	WNT16	0	1	3.11881	0.135977	0.234845	0.199516	-4.80687	0.0156016	0	1	11.8885	1.35801e-09	0.119535	0.513739	-0.409365	0.803703
ENSG00000002746	HECW1	1.61174	0.0410188	1.17958	0.481198	0.577899	1.86641e-06	0.665377	0.534604	-1.66198	0.110124	-0.0214608	0.990355	-0.924246	6.4558e-12	4.74028	1.60297e-07
ENSG00000002822	MAD1L1	0.0283183	0.829669	-0.00736995	0.95603	-0.51466	6.65032e-15	0.0647201	0.639834	0.691405	1.22034e-07	0.0444741	0.737824	-0.695644	8.81995e-26	-0.110063	0.424799
ENSG00000002834	LASP1	0.271761	0.000278852	-0.769155	1.71001e-24	0.219215	0.000595894	-0.214384	0.00422481	-0.710342	2.3813e-21	-0.189504	0.0115772	0.530309	8.88561e-17	0.297268	7.10831e-05
ENSG00000002919	SNX11	1.20238	2.13361e-39	0.0136179	0.883203	-0.100502	0.232397	0.279072	0.00137849	0.843133	6.85042e-20	-0.035112	0.700584	0.016192	0.845509	-0.00134289	0.98772
ENSG00000002933	TMEM176A	1.76902	0.257698	3.2944	3.45801e-153	X	X	2.18568	4.86654e-66	1.65715	0.288952	-3.80988	1.54678e-104	X	X	-4.20855	1.3503e-89
ENSG00000003056	M6PR	0.498051	4.948e-20	-0.192076	0.000391663	-0.270203	0.000687229	-0.29138	1.04016e-06	0.966926	1.58679e-72	-0.416534	1.25705e-14	-0.0516284	0.515158	0.242221	2.20161e-05
ENSG00000003096	KLHL13	0	1	0.283699	0.866736	1.01638	6.0541e-08	0.208572	0.526494	1.65845	0.295191	2.19747	0.109542	-0.801646	0.000186553	0.925032	0.00373973
ENSG00000003137	CYP26B1	0.447231	0.00748124	-0.791628	0.00332596	3.90477	1.57252e-78	-2.16171	4.06335e-08	-3.76651	7.92309e-80	-3.68185	1.62777e-14	4.047	7.28073e-85	-0.397173	0.138562
ENSG00000003147	ICA1	0	1	1.94661	1.14442e-21	1.40641	0.00118089	1.73362	2.36826e-18	2.24324	0.123219	2.71653	4.20557e-41	0.736629	0.100614	-0.184093	0.360325
ENSG00000003249	DBNDD1	-0.105806	0.348052	0.442767	0.000184849	-0.329698	9.63833e-06	1.06427	2.40581e-17	-1.05303	4.20993e-20	2.18561	6.13009e-81	-1.22374	2.35575e-57	2.26595	1.20176e-77
ENSG00000003393	ALS2	-0.239215	0.0328499	0.39956	0.000936667	-0.457916	5.6506e-11	0.0352402	0.76093	-0.290114	0.00962631	0.441566	0.000225179	-0.202007	0.00347014	0.430928	0.000170554
ENSG00000003400	CASP10	2.01669	3.48656e-13	1.60317	5.38389e-05	0.197011	0.0240674	2.19595	1.41137e-29	2.40072	1.52822e-18	1.80779	2.46555e-06	-0.650614	7.66697e-13	-0.0148089	0.940062
ENSG00000003402	CFLAR	1.02753	6.013e-35	1.11406	1.67304e-35	-0.129805	0.051688	0.973261	6.00162e-33	1.66059	3.25236e-89	0.273734	0.00263686	-0.583682	5.22702e-18	0.360504	9.79428e-06
ENSG00000003436	TFPI	-0.212923	0.0754627	-0.54154	0.097616	-1.07404	1.90371e-30	-0.424576	0.000365121	1.88983	7.4725e-57	-6.83371	1.16553e-08	-1.30431	4.75432e-44	0.0455057	0.701597
ENSG00000003509	NDUFAF7	0.465902	0.00141724	-0.0748456	0.601393	0.480685	4.10326e-10	0.29564	0.0548665	-0.0296783	0.840546	-0.395884	0.00574873	0.339514	1.03169e-05	0.28125	0.0648434
ENSG00000003756	RBM5	0.742052	1.06379e-06	1.32302	2.5229e-18	0.656228	1.09179e-26	0.994407	7.37952e-11	0.65562	1.62136e-05	0.495359	0.0011034	-0.190592	0.00214836	-0.0927069	0.546213
ENSG00000003989	SLC7A2	2.7708	0.0531177	-5.41558	8.2292e-07	-0.990128	0.116704	0.415672	0.29094	2.99427	0.0317811	0.951053	0.0232053	-1.10329	0.0803792	1.59864	4.09892e-05
ENSG00000004059	ARF5	0.319456	6.45469e-07	0.161656	0.0114781	0.708177	1.85714e-26	-0.031062	0.64062	0.170728	0.00788643	0.919136	2.83957e-49	0.165652	0.0135951	-0.642164	2.63036e-21
ENSG00000004139	SARM1	-0.322198	0.0875389	1.09709	5.88391e-13	0.39273	2.84604e-05	0.883258	1.9048e-08	-1.51652	1.70906e-12	-1.19222	2.14248e-12	-0.563279	8.8659e-09	0.396471	0.0123885
ENSG00000004142	POLDIP2	0.226599	0.00134177	-0.597643	1.25698e-17	0.0492114	0.400259	-0.299224	4.81388e-05	0.0831195	0.239764	-0.317466	4.39757e-06	0.443674	2.06634e-14	0.233483	0.00113698
ENSG00000004399	PLXND1	-0.577768	0.0140452	-5.60674	3.83474e-105	-1.2386	1.61719e-52	0.0267311	0.9104	-2.38034	5.72974e-24	-10.6816	3.52509e-72	-0.779096	6.31175e-22	0.5102	0.0312836
ENSG00000004455	AK2	0.253402	1.9635e-05	-1.15693	7.19323e-82	-0.426937	1.34636e-13	-0.660236	3.9368e-27	-0.846757	1.10684e-43	-1.00565	2.36544e-64	0.432317	2.59841e-14	-0.324818	5.74446e-08
ENSG00000004468	CD38	2.81833	0.0519944	0.447638	0.645905	X	X	1.76385	0.00917018	3.79729	0.00677437	0.670731	0.474159	X	X	-1.9007	0.00505523
ENSG00000004478	FKBP4	-0.606906	0.000911287	-0.831063	5.41245e-06	-0.53363	1.78774e-18	-0.250374	0.175531	-0.405028	0.0267689	-0.751442	3.86591e-05	0.513037	1.47753e-17	0.247493	0.178828
ENSG00000004487	KDM1A	-0.383064	2.28866e-08	-0.990331	1.05332e-48	-0.0811618	0.160404	-0.793401	2.86575e-30	-0.43981	1.34278e-10	-0.840579	5.5471e-36	0.544102	1.46085e-21	-0.17272	0.01125
ENSG00000004534	RBM6	1.14	3.74185e-15	0.62282	1.47384e-05	1.40667	6.88796e-125	1.19048	2.3169e-16	1.07663	1.10664e-13	0.191152	0.183818	0.441673	1.60591e-13	-0.268029	0.0672378
ENSG00000004660	CAMKK1	0.110842	0.645517	-0.547918	0.022415	-1.38543	6.03149e-74	0.284341	0.275633	-2.02227	6.4268e-16	-0.00471656	0.984212	-0.827419	1.16007e-29	0.721822	0.00475978
ENSG00000004700	RECQL	0.820349	1.4227e-14	-1.00859	1.93631e-22	-0.509211	3.20722e-13	-0.896784	2.16476e-14	0.783365	1.90729e-13	-1.14591	1.23172e-28	-0.107639	0.118429	0.168055	0.127325
ENSG00000004766	CCDC132	0.824629	1.84112e-07	-0.389055	0.00987904	0.502871	1.28563e-08	0.301267	0.0460948	1.12586	6.97392e-13	-0.0424336	0.775586	0.447314	3.87293e-07	0.262145	0.0812532
ENSG00000004776	HSPB6	1.30933	0.102154	-0.842016	0.353368	1.45915	0.0176946	-0.492719	0.504784	-0.00860799	0.992118	-0.115132	0.886029	1.16425	0.0612209	-0.716944	0.32937
ENSG00000004777	ARHGAP33	-0.435551	0.0106234	0.896074	2.06215e-07	0.774818	8.32879e-16	-0.432642	0.0131625	-1.14375	4.04139e-11	1.09231	1.76298e-10	0.259567	0.00794259	-0.16613	0.333587
ENSG00000004779	NDUFAB1	0.131496	0.103008	-0.631419	2.28639e-17	-0.178063	0.0144007	-0.495329	1.66143e-10	0.101395	0.206734	-0.222777	0.00206021	0.436737	7.29304e-10	-0.183554	0.0145053
ENSG00000004799	PDK4	1.89525	1.48653e-09	-0.270758	0.304156	1.37832	8.39934e-44	1.49971	1.75037e-11	-0.320334	0.378818	2.73653	3.33664e-30	4.0611	0	-0.804316	0.00044054
ENSG00000004838	ZMYND10	-0.230989	0.629132	1.01527	0.0137052	-0.109837	0.746315	0.934935	0.0222034	0.379401	0.403185	0.20798	0.621751	-0.782013	0.0292134	0.611603	0.135423
ENSG00000004846	ABCB5	2.60221	0.0126828	0	1	X	X	-3.49192	0.0256215	-0.114148	0.919845	0	1	X	X	-0.160618	0.890834
ENSG00000004848	ARX	-1.0498	0.606164	1.01488	0.519131	0.18838	0.522833	3.25377	0.0719923	-1.16081	0.568626	1.42092	0.350523	0.0819526	0.780864	7.01161	2.69573e-05
ENSG00000004864	SLC25A13	0.240563	0.0280538	-0.624497	5.69471e-15	0.828203	5.47475e-25	-0.689351	9.36289e-15	2.25516	4.36714e-115	0.24416	0.0017354	1.28426	2.10966e-59	-0.378567	1.04423e-05
ENSG00000004866	ST7	0.21662	0.0185909	-0.262506	0.000178661	0.0863589	0.343695	-0.284842	0.000510302	0.64864	2.20326e-13	0.657998	1.56666e-22	0.0219107	0.809597	-0.591882	5.91934e-13
ENSG00000004897	CDC27	0.032607	0.770089	-0.835993	1.65851e-13	-0.151431	0.0221245	-0.84818	4.71052e-14	-0.0263053	0.813543	-0.612719	5.15833e-08	0.491383	5.1048e-14	-0.246238	0.0271539
ENSG00000004939	SLC4A1	X	X	X	X	2.24426	1.26293e-07	X	X	X	X	X	X	-0.79843	0.140181	X	X
ENSG00000004948	CALCR	1.15105	0.083175	2.50396	0.0763456	X	X	0.356359	0.704907	1.39722	0.0321263	2.44172	0.0789104	X	X	4.7384	1.74427e-10
ENSG00000004961	HCCS	0.329131	0.00168182	-0.268678	0.00963705	0.385409	7.26125e-09	0.159727	0.128	0.731042	1.9298e-12	-0.476632	4.17049e-06	0.639792	2.65282e-22	-0.0128658	0.902174
ENSG00000004975	DVL2	-0.296878	0.000637848	0.164842	0.0574361	0.0364198	0.571055	-0.155828	0.0994009	-0.341227	8.5291e-05	0.667753	8.08444e-15	0.178406	0.00521509	0.117718	0.203422
ENSG00000005001	PRSS22	-1.92529	0.224166	2.77005	1.05721e-12	-4.14766	0.000696901	1.49619	4.85599e-08	1.14806	0.354206	2.5292	7.31303e-11	-3.27023	0.000959249	0.0275098	0.920212
ENSG00000005007	UPF1	-0.301024	1.181e-05	0.0505459	0.457418	-1.07803	4.24734e-59	-0.240431	0.000491059	-0.0409695	0.549194	-0.0781756	0.249624	0.0664386	0.311361	-0.010356	0.879788
ENSG00000005020	SKAP2	0.816254	2.61966e-08	-0.243883	0.0879817	0.243594	0.00475502	0.346063	0.0139185	0.416203	0.00471524	-0.166738	0.241478	1.52311	1.03503e-73	-0.666563	2.44266e-06
ENSG00000005022	SLC25A5	-1.332	3.85659e-46	-0.931449	1.08207e-23	-0.474467	6.9691e-12	-0.74544	1.96521e-15	-0.259334	0.00522946	-0.530789	9.97474e-09	0.280983	4.46066e-05	-0.335128	0.000331959
ENSG00000005059	CCDC109B	0.205165	0.26832	-1.86556	6.27665e-18	0.789194	2.94367e-22	-1.49872	4.11699e-14	0.234675	0.204575	0.386737	0.0419713	0.582348	1.00326e-12	-0.694482	0.00024859
ENSG00000005073	HOXA11	-0.0526653	0.690761	-1.01	1.66675e-13	0.302824	0.0716013	-1.43238	1.26373e-06	0.259544	0.0463069	2.53072	6.47443e-95	-0.283677	0.10315	-0.0932542	0.671753
ENSG00000005075	POLR2J	-0.202844	0.0233271	-0.211645	0.0102858	0.0402515	0.674619	-0.144083	0.0871764	0.43775	1.99284e-07	0.491386	1.49541e-10	0.251782	0.00747524	-0.326404	9.20169e-05
ENSG00000005100	DHX33	-0.780645	6.19419e-26	-0.756417	1.2615e-26	-0.961947	9.73246e-61	-0.302196	0.000222045	-0.287913	7.54037e-05	-0.711945	4.31533e-24	0.195995	0.000470706	0.0784533	0.319443
ENSG00000005102	MEOX1	X	X	X	X	-1.26954	0.0866646	X	X	X	X	X	X	-0.0480843	0.940216	X	X
ENSG00000005108	THSD7A	1.76959	0.259069	-0.612214	0.696212	X	X	0.468128	0.028029	0	1	5.10527	1.13998e-06	X	X	-0.210271	0.335757
ENSG00000005156	LIG3	-0.366436	0.0112267	-1.03759	1.85136e-12	-0.874055	3.1382e-38	-0.268153	0.0763107	-0.273589	0.0578149	-0.18439	0.202039	0.301265	5.06346e-06	0.220235	0.138303
ENSG00000005175	RPAP3	-0.0353988	0.737324	-1.03341	9.07742e-26	-0.453783	9.19176e-09	-0.5059	1.21058e-06	0.202458	0.052019	-0.520386	6.95412e-08	0.521389	4.58721e-12	-0.00210401	0.98339
ENSG00000005187	ACSM3	-0.360018	0.125167	2.02273	2.30474e-05	-1.03603	0.00385494	0.328223	0.17606	-1.29777	7.34958e-08	-0.76361	0.237763	-1.59742	2.54717e-05	0.440928	0.06607
ENSG00000005189	AC004381.6	0.232487	0.081893	0.224491	0.0585292	-0.138976	0.142353	-1.3084	1.4335e-19	0.46514	0.000354912	-0.00571743	0.961373	0.0870325	0.347218	-0.5319	2.53904e-05
ENSG00000005194	CIAPIN1	0.0199813	0.8907	-0.184353	0.192572	0.0127082	0.851675	-0.199036	0.172202	0.108191	0.455557	-0.582348	3.91106e-05	-0.512845	1.0806e-13	1.07832	4.65845e-14
ENSG00000005206	SPPL2B	0.229248	0.0527368	2.34461	7.64256e-90	-0.0505485	0.500811	1.02591	4.75775e-18	0.112771	0.340679	0.682192	5.63585e-09	-0.363579	1.37605e-06	0.0343328	0.773444
ENSG00000005238	FAM214B	0.0985823	0.367557	2.15644	9.51872e-41	-1.29849	3.19263e-39	-0.240392	0.0392681	-1.19616	6.97168e-27	0.638903	0.000237045	-0.518306	3.71711e-08	-1.2266	2.39135e-24
ENSG00000005243	COPZ2	2.47675	4.00699e-11	0.801801	0.0235188	1.97098	8.02513e-48	0.43674	0.194314	1.78114	2.49319e-06	0.936954	0.00763929	0.130141	0.379088	0.560863	0.0944981
ENSG00000005249	PRKAR2B	-0.0962524	0.772347	0.283087	0.848183	-0.877538	1.66455e-15	-2.56338	9.06043e-07	-1.60928	2.03361e-06	-1.87961	0.237659	-2.76829	2.53773e-108	2.25552	3.60272e-10
ENSG00000005302	MSL3	0.181238	0.0517661	-0.154346	0.0953483	-0.490686	1.01378e-10	0.19347	0.0519528	0.192715	0.0379166	-0.53935	6.25125e-09	-0.206615	0.00534284	-0.294953	0.00342514
ENSG00000005339	CREBBP	-0.324573	5.12435e-06	0.386953	2.85415e-08	-0.323713	6.41629e-06	-0.207203	0.0035581	0.027764	0.693645	0.124883	0.0730744	0.867852	1.18088e-35	-0.210144	0.00291803
ENSG00000005379	BZRAP1	-1.55524	0.282815	1.02382	7.23132e-15	X	X	1.87199	2.24154e-32	-0.187655	0.874124	1.8268	6.31467e-45	X	X	-0.117926	0.50179
ENSG00000005421	PON1	0	1	4.39455	4.79711e-12	X	X	0.692607	0.354478	0	1	7.834	3.05729e-36	X	X	0.906405	0.199398
ENSG00000005436	GCFC2	-0.0571265	0.57861	-0.892161	5.29322e-18	-0.526833	1.37578e-13	-0.446629	9.91628e-05	-0.109187	0.287027	-0.950656	7.39518e-21	0.305087	9.42407e-06	0.23882	0.0252379
ENSG00000005448	WDR54	-0.551464	4.89943e-05	-0.39368	0.00394722	-0.265778	0.000248527	-1.33031	1.12791e-21	-0.104981	0.432948	-0.290468	0.0312966	0.237249	0.000733679	0.295867	0.024319
ENSG00000005469	CROT	0.641008	1.37636e-06	0.443025	0.000415862	0.566682	1.36052e-06	0.442978	0.000155502	0.720251	3.81851e-08	0.223033	0.0735025	0.624021	7.75336e-08	0.15925	0.174131
ENSG00000005471	ABCB4	5.85783	1.52296e-06	-1.77552	0.00927619	-0.983891	0.000915235	0.383138	0.140513	1.65731	0.290977	5.8655	3.21553e-64	-3.53284	3.50249e-16	-0.25466	0.342854
ENSG00000005483	KMT2E	0.216275	0.00174972	0.674188	6.96826e-23	-0.0906043	0.134308	0.399211	4.58739e-09	0.0783537	0.25717	0.473186	4.33269e-12	-0.348171	9.5564e-09	-0.398443	7.82787e-09
ENSG00000005486	RHBDD2	0.609514	2.56023e-15	0.558515	2.29416e-12	-0.143897	0.0560902	0.802263	7.32108e-23	-0.613557	3.2305e-15	0.803885	2.54511e-24	-0.501721	3.41285e-11	-0.372941	8.36225e-06
ENSG00000005513	SOX8	-1.0498	0.570814	1.72525	0.0332055	-0.943291	3.80716e-22	-2.71329	0.0147018	-1.16081	0.530792	-8.17706	3.29237e-16	-1.33992	4.07643e-42	0.505105	0.563003
ENSG00000005700	IBTK	0.44165	4.4953e-05	0.0514465	0.638388	-0.748758	9.66332e-20	-0.307262	0.00590774	0.0627423	0.563067	-0.253822	0.0204216	0.11354	0.164739	0.390944	0.000364964
ENSG00000005801	ZNF195	-0.625918	2.56378e-11	0.0624766	0.450579	-0.123965	0.102532	0.0820045	0.411175	0.111874	0.212135	-0.599794	7.72323e-13	0.0845274	0.25733	0.219813	0.0233641
ENSG00000005810	MYCBP2	0.378785	7.63392e-05	-0.431479	1.34756e-06	-0.669315	7.4948e-17	-0.380918	5.86078e-05	0.544149	1.08534e-08	0.302858	0.000641349	-0.218876	0.00574236	0.198359	0.0325821
ENSG00000005812	FBXL3	0.480531	2.49293e-05	-0.465411	1.24733e-06	-0.216875	0.0289632	-0.270678	0.0108946	0.954926	8.293e-18	0.0219938	0.815953	0.620933	6.89206e-11	-0.220464	0.034812
ENSG00000005844	ITGAL	X	X	X	X	-1.091	0.16132	X	X	X	X	X	X	-2.00387	0.019236	X	X
ENSG00000005882	PDK2	-0.180191	0.233639	1.59491	1.88366e-25	0.769525	5.47173e-10	0.0596168	0.721518	-0.822533	6.73048e-08	-0.314761	0.0445175	0.460234	0.000241904	-0.192334	0.249684
ENSG00000005884	ITGA3	-0.116719	0.442973	1.9757	5.36773e-36	-0.519156	1.06259e-13	-0.879669	7.40855e-09	0.743232	1.02604e-06	0.85934	6.17584e-08	1.31473	1.55234e-82	-0.0549337	0.717945
ENSG00000005889	ZFX	0.655829	1.39418e-06	-0.174159	0.19916	0.211902	0.00455222	0.00865908	0.949987	0.110689	0.416988	-0.223893	0.0980412	0.568801	1.33397e-14	0.400966	0.00339248
ENSG00000005893	LAMP2	0.513756	2.4529e-06	0.308477	0.00489762	0.186908	0.0643503	0.152836	0.168451	0.861261	2.55988e-15	0.246181	0.0245325	-0.071143	0.481593	0.789754	7.41659e-13
ENSG00000005955	GGNBP2	-0.154474	0.00477665	0.217107	0.000134727	X	X	0.417281	4.76822e-14	0.0732706	0.174854	0.0607213	0.281943	X	X	0.152173	0.00595339
ENSG00000005961	ITGA2B	0.11068	0.874837	-0.416124	0.560042	0.479644	0.246874	0.543242	0.451627	-0.408504	0.570355	1.70645	0.00854048	-0.197317	0.649324	3.52761	1.11883e-07
ENSG00000005981	ASB4	-3.25169	0.0161009	-2.60886	1.74403e-47	2.45553	0.0912573	-0.627552	0.300915	-3.36271	0.012818	1.90905	4.13385e-37	8.77347	2.1253e-13	-2.49727	0.00616458
ENSG00000006007	GDE1	0.438711	1.98303e-07	0.324791	0.00013507	-0.0255521	0.714339	-0.321817	0.000157024	0.403116	1.71139e-06	0.639094	2.97226e-14	0.0934569	0.177798	0.41113	8.04397e-07
ENSG00000006015	C19orf60	0.339618	0.0157073	0.685445	3.04103e-09	0.201975	0.037851	0.193166	0.0978312	1.68916	3.59958e-37	0.496439	1.68483e-05	0.571861	1.87713e-09	-0.248522	0.0339831
ENSG00000006016	CRLF1	-2.16582	2.40122e-27	-1.71665	0.135886	1.46461	5.08996e-66	-4.37545	0.000328021	-5.72929	6.64865e-45	-0.439463	0.580124	-1.10723	1.99217e-35	-3.18119	0.000340919
ENSG00000006025	OSBPL7	-0.107392	0.300809	1.90683	1.64381e-72	-0.0379762	0.724706	0.778664	5.23144e-15	-0.13437	0.19422	0.80584	8.73967e-14	-1.9781	1.04377e-63	-0.224194	0.0269137
ENSG00000006042	TMEM98	3.76799	0.00380426	-1.55383	3.11079e-09	X	X	1.13759	0.00194074	5.41177	1.07667e-05	2.36795	7.13855e-25	X	X	4.27381	1.38557e-39
ENSG00000006047	YBX2	-0.109438	0.807858	0.459704	0.30761	X	X	0.823886	0.0896726	-0.760191	0.0913093	-0.694297	0.123792	X	X	1.2868	0.00728516
ENSG00000006059	KRT33A	-1.83609	0.753652	0	1	X	X	1.33367	0.820317	-1.9471	0.739284	3.45691	0.549959	X	X	0	1
ENSG00000006062	MAP3K14	1.31713	3.92482e-20	0.0400158	0.79737	-0.28511	1.78524e-06	0.268939	0.0683954	2.21763	3.74837e-54	-1.77703	6.29968e-26	-0.276384	3.37994e-06	0.837984	1.01294e-08
ENSG00000006071	ABCC8	0	1	2.77868	2.2555e-10	-1.4582	0.0575885	-2.05765	0.166219	0	1	-6.04736	1.38247e-06	-1.10589	0.124136	-2.33607	0.116
ENSG00000006114	SYNRG	-0.110896	0.298949	0.547547	3.65787e-07	X	X	0.434393	3.18798e-05	0.00354707	0.973442	-0.0850219	0.431641	X	X	0.329688	0.00158721
ENSG00000006118	TMEM132A	-0.170527	0.0842027	0.23493	0.017113	-0.420597	6.37391e-09	0.331688	0.000667643	0.358651	0.000260712	0.194597	0.0477608	-1.31544	1.68138e-70	0.820536	2.98297e-17
ENSG00000006125	AP2B1	0.397835	0.00180802	-0.308616	0.0162438	-0.965518	1.87027e-37	-0.880757	6.24007e-12	-0.267721	0.0358241	0.0241752	0.85039	0.359947	1.72097e-06	0.0750633	0.556929
ENSG00000006194	ZNF263	0.133532	0.0245176	0.155973	0.00622632	-0.312916	2.21622e-05	0.439554	4.21055e-12	0.122546	0.0375897	0.0946643	0.0909644	0.00149348	0.983529	0.36629	4.12909e-09
ENSG00000006210	CX3CL1	4.13808	1.57074e-36	2.3949	5.6563e-13	7.64119	9.94908e-120	2.16795	3.54037e-11	2.06398	3.12528e-10	-4.55056	1.05523e-26	-0.169817	0.71192	2.98592	7.25729e-20
ENSG00000006282	SPATA20	0.675326	9.29772e-05	1.22586	1.51957e-12	0.422066	1.04457e-13	0.717529	3.27283e-05	0.482984	0.00519623	-1.34062	2.44555e-14	-1.02304	3.11007e-70	0.362143	0.0360885
ENSG00000006283	CACNA1G	-0.751262	0.134999	4.74216	2.2046e-05	0.541754	0.0113267	0.380086	0.645338	-2.61657	2.54887e-05	3.07866	0.00743907	-2.8607	2.92505e-20	2.89531	1.95138e-05
ENSG00000006327	TNFRSF12A	-0.15729	0.239255	-1.86653	2.94797e-40	-0.324513	1.26388e-05	-0.605255	4.29296e-06	1.14769	5.32634e-18	-3.40883	2.14401e-113	0.444819	9.65717e-10	-0.107066	0.415264
ENSG00000006377	DLX6	0	1	-0.992336	2.23038e-06	-0.908481	3.59876e-08	0.372104	0.824068	0	1	1.13785	6.19439e-10	-1.04472	2.57242e-10	2.56623	0.0530906
ENSG00000006432	MAP3K9	-0.599189	9.92345e-12	0.37158	4.32495e-05	-0.829254	1.26686e-13	-0.0685054	0.433735	-0.695787	2.62756e-15	0.0156118	0.863788	1.07603	1.42604e-27	0.250048	0.00390251
ENSG00000006451	RALA	-0.106703	0.443424	-0.943917	9.181e-12	-0.218375	0.00194284	-0.413054	0.00334825	0.0484455	0.727079	-0.37685	0.00598397	0.101777	0.142265	0.296856	0.0324139
ENSG00000006453	BAIAP2L1	-1.09597	2.93829e-53	-0.889962	6.05054e-30	0.013003	0.836879	1.31536	2.08034e-76	-0.545625	1.07933e-14	0.000202013	0.997837	0.346321	2.87387e-08	-0.500072	7.02688e-12
ENSG00000006459	KDM7A	0.34842	0.00595332	-0.00370827	0.975784	-1.29956	8.67045e-26	0.614266	1.79189e-05	-1.03284	5.36069e-15	2.18386	3.83493e-74	-0.368038	0.00211563	0.455305	0.00138215
ENSG00000006468	ETV1	-3.05602	2.89827e-41	-8.26038	1.88464e-52	-3.90955	3.39297e-179	-8.01863	7.11606e-33	-9.14709	1.13108e-18	-1.5997	2.65024e-17	-2.1142	4.2049e-87	-1.04103	6.14121e-08
ENSG00000006530	AGK	-0.496558	2.13461e-10	-0.373167	6.819e-07	-0.120881	0.0291983	-0.105662	0.212999	0.0629415	0.4086	-0.308107	3.2989e-05	0.643852	9.01008e-33	-0.112571	0.176764
ENSG00000006534	ALDH3B1	1.16116	1.31179e-27	3.0356	7.12689e-141	2.51723	5.36493e-265	1.35805	7.84126e-40	0.965723	1.48814e-19	0.243106	0.0628702	0.936286	9.20588e-37	0.029052	0.779642
ENSG00000006555	TTC22	0	1	1.17833	0.456085	X	X	1.66488	5.3876e-10	2.65518	0.0591027	-0.0214608	0.98985	X	X	-0.0658634	0.806947
ENSG00000006576	PHTF2	0.666759	9.36071e-10	-0.867395	2.2611e-13	0.263146	0.00015043	-1.11725	9.66985e-23	-0.627083	1.45891e-08	0.385576	0.000611638	0.572281	1.05524e-16	-0.302879	0.00614524
ENSG00000006606	CCL26	-0.0732317	0.935285	-4.07364	0.00128105	X	X	-0.295675	0.588276	1.13093	0.146244	-0.571136	0.334943	X	X	4.76328	1.02813e-27
ENSG00000006607	FARP2	0.16762	0.250554	-0.149241	0.308478	0.0269863	0.710296	0.420443	0.0043536	-0.0283212	0.846154	-0.220714	0.13123	0.35971	5.7822e-07	0.0969464	0.511101
ENSG00000006611	USH1C	-0.225809	0.580007	1.0024	7.69027e-06	-0.029935	0.891885	1.44753	1.92658e-10	-3.83796	1.72356e-05	-1.40711	4.02921e-10	-4.65892	2.32987e-22	-2.42202	1.00885e-23
ENSG00000006625	GGCT	-0.636967	2.38876e-06	-0.944501	8.0343e-14	0.161503	0.0905419	-0.8442	1.45371e-09	0.200523	0.125677	0.491202	6.85237e-05	0.255474	0.00677566	-0.312389	0.0197682
ENSG00000006634	DBF4	-0.861991	2.21639e-10	-1.59011	5.06051e-31	-0.338047	7.23149e-05	-2.09199	8.50465e-43	-0.0286396	0.827984	-0.128508	0.319235	0.682482	7.347e-17	-0.404615	0.00255912
ENSG00000006638	TBXA2R	0.0280595	0.88583	-0.780109	0.16541	0.0648667	0.584072	0.0991927	0.858271	-1.29941	5.28618e-11	-1.0832	0.0538424	-0.893878	1.71254e-12	1.18797	0.0108334
ENSG00000006652	IFRD1	1.25197	1.79345e-42	-0.0944446	0.278824	-0.708732	1.01654e-17	0.594238	5.62871e-11	0.384474	3.84502e-05	-0.930551	6.78502e-26	-0.246093	0.00263223	0.690819	1.46606e-14
ENSG00000006695	COX10	0.0294269	0.807961	-0.557017	5.75434e-06	-1.09453	5.27004e-27	-0.134862	0.363627	-0.673209	5.34587e-08	-0.439842	0.00026923	0.0697647	0.464823	0.290455	0.0387898
ENSG00000006704	GTF2IRD1	-0.0502183	0.68266	0.378558	0.0022066	-0.331168	1.17643e-07	0.739403	7.92038e-09	-1.15871	5.18894e-21	-0.151794	0.220172	-0.322462	2.32756e-07	0.130513	0.310974
ENSG00000006712	PAF1	-0.659557	1.95152e-16	-0.244179	0.00221111	0.0981291	0.15844	-0.401686	4.24709e-07	0.0707263	0.366521	-0.0733213	0.351417	0.647867	1.46158e-21	-0.225658	0.00397492
ENSG00000006715	VPS41	0.174853	0.0548218	-0.0654704	0.481436	-0.0863604	0.273401	0.488765	1.55373e-07	0.431358	1.95579e-06	-0.152724	0.0989171	-0.251388	0.00144613	0.533708	8.25292e-09
ENSG00000006740	ARHGAP44	0.328213	0.00160727	-0.362275	0.0320553	0.0776621	0.314505	0.86588	0.00228071	-1.11991	3.42887e-23	-2.90648	3.40101e-26	0.617241	1.52316e-16	0.663988	0.0180885
ENSG00000006744	ELAC2	0.0419916	0.523996	-0.71349	2.48952e-27	-0.232149	1.84712e-05	-0.263514	0.000205865	0.43967	1.75893e-11	-0.442655	1.03383e-11	0.223009	3.07455e-05	0.130716	0.0585087
ENSG00000006747	SCIN	0.808653	0.318392	2.19085	0.012943	X	X	1.19033	0.000838042	-0.769735	0.439137	-1.02424	0.429151	X	X	-0.58005	0.111496
ENSG00000006756	ARSD	0.403014	0.108209	2.45072	2.02751e-18	0.918691	2.40989e-36	0.124023	0.617272	0.119987	0.632826	-4.37941	7.28183e-13	0.682358	1.18499e-20	-0.278876	0.261358
ENSG00000006757	PNPLA4	0.926779	0.06848	0.519404	0.000393668	X	X	-0.102068	0.513016	-2.88564	0.00896143	-1.18301	2.15127e-14	X	X	-0.0497077	0.746345
ENSG00000006831	ADIPOR2	-0.494875	3.85114e-17	-0.997701	3.65206e-66	-0.608348	3.99562e-17	-0.566586	1.2542e-18	-0.420971	6.29921e-13	-0.093683	0.0985295	0.10018	0.161958	-0.345656	3.31868e-08
ENSG00000006837	CDKL3	0.363125	0.307862	0.556144	0.10108	-0.0849996	0.743527	0.805474	0.00876206	-1.11251	0.0101791	0.0380056	0.912895	-0.677159	0.0127717	0.278344	0.376565
ENSG00000007038	PRSS21	0	1	-0.678096	0.688522	X	X	-0.998547	0.000764156	2.24165	0.127875	-0.983256	0.561065	X	X	-0.267981	0.364751
ENSG00000007047	MARK4	-0.34693	2.43728e-06	0.995209	1.99388e-31	-0.702069	3.89577e-18	0.62808	1.34385e-14	-0.883261	2.58784e-32	0.833918	7.8314e-23	-0.199517	0.0127756	0.758838	2.81639e-21
ENSG00000007062	PROM1	0	1	3.71333	2.32366e-76	3.85641	8.45908e-06	2.06627	1.70969e-25	5.86989	1.43135e-06	1.19952	2.77643e-09	0.905541	0.358519	1.25708	2.1964e-10
ENSG00000007080	CCDC124	-0.4392	7.2011e-07	-0.55572	1.31589e-10	0.0388946	0.553231	-0.161449	0.0635708	0.0746973	0.39128	-0.0864733	0.308983	0.0557042	0.394398	0.0433849	0.613958
ENSG00000007129	CEACAM21	0	1	1.92221	0.00725951	X	X	0.946045	0.498817	0	1	6.12058	3.23563e-20	X	X	-0.789362	0.627144
ENSG00000007168	PAFAH1B1	0.467026	1.07538e-16	-0.0235147	0.673323	0.0819713	0.186277	-0.116907	0.049803	0.355421	2.72957e-10	0.0158026	0.775577	0.320441	2.13151e-07	0.0722985	0.216899
ENSG00000007171	NOS2	2.1527	0.0303257	1.24549	0.465865	1.88922	0.00557474	7.29416	5.26065e-09	0.220732	0.850085	0	1	0.572233	0.435383	2.52926	0.0897705
ENSG00000007174	DNAH9	0.73249	0.440085	4.90494	4.60628e-08	X	X	1.95543	0.106663	0.393693	0.686359	11.2112	4.83924e-37	X	X	-1.76082	0.266345
ENSG00000007202	KIAA0100	0.0184151	0.696965	-0.364237	1.97726e-14	-0.716506	1.0452e-36	-0.251707	2.65792e-07	0.232219	8.29484e-07	-0.155222	0.0010131	0.111791	0.046377	0.0740993	0.124434
ENSG00000007237	GAS7	-0.421393	0.489737	2.40946	2.3333e-18	X	X	-2.56547	5.24244e-29	-0.992166	0.135985	-2.49935	8.54911e-07	X	X	-3.86248	1.2793e-48
ENSG00000007255	TRAPPC6A	0.197544	0.0624155	1.50008	3.33005e-48	0.474693	1.2051e-06	1.10931	5.18134e-25	-0.378428	0.000587798	0.760478	4.65903e-13	-0.0544699	0.583492	0.899935	3.95912e-17
ENSG00000007264	MATK	-1.06534	0.655331	1.24549	0.63466	-1.77701	4.08671e-47	-2.42326	0.323607	0.975717	0.658553	0	1	-0.358351	0.000841336	-0.834921	0.726008
ENSG00000007306	CEACAM7	0	1	-4.38462	0.00658256	X	X	7.24666	3.7854e-12	3.01396	0.0748339	-4.68978	0.00365647	X	X	1.78227	0.0885376
ENSG00000007312	CD79B	-2.49927	0.0157289	2.1487	0.214882	-1.30381	0.0158777	-1.1988	0.391136	-5.79744	5.02014e-05	0	1	-3.05875	7.87628e-06	2.39624	0.0163529
ENSG00000007314	SCN4A	-3.10322	4.77889e-05	0.435376	0.623697	-3.20682	1.81017e-07	-1.61806	0.0579559	-7.39835	2.50795e-08	-3.09081	0.0275542	-4.31889	1.66796e-08	0.618194	0.371627
ENSG00000007341	ST7L	0.108508	0.18825	0.0622042	0.472129	-0.0262091	0.8346	-0.210802	0.0473668	-0.462723	5.39119e-08	-0.05168	0.544478	-0.0723212	0.562939	-0.235019	0.0225706
ENSG00000007350	TKTL1	3.25562	8.1925e-08	0.547316	0.551239	X	X	-1.47689	0.351305	-1.17957	0.204147	-3.20033	0.0197299	X	X	2.07839	0.0775231
ENSG00000007372	PAX6	-1.31133	1.50646e-23	-0.765828	1.21273e-05	-0.0982913	0.215177	0.354126	0.0702146	-0.953169	2.78328e-13	-0.663659	7.90418e-05	0.0107672	0.890756	-4.32203	1.78349e-17
ENSG00000007376	RPUSD1	-0.425136	3.36634e-05	-0.349718	0.000131141	-0.206757	0.0243721	-0.211093	0.0423469	0.268729	0.00663313	-0.413147	5.65065e-06	0.0113924	0.89964	0.0341305	0.735601
ENSG00000007384	RHBDF1	0.424815	0.00168588	0.582234	3.46118e-05	-0.202592	0.00529131	0.587432	1.73125e-05	-1.01536	1.02644e-13	-3.26946	6.94795e-81	-1.15205	5.13665e-53	-0.0719128	0.600163
ENSG00000007392	LUC7L	0.0731236	0.364958	0.977115	2.10027e-38	0.686327	1.61522e-21	0.936197	6.22177e-33	0.269323	0.00074985	0.0147949	0.846269	0.222934	0.00217998	-0.0372655	0.641398
ENSG00000007402	CACNA2D2	0.807582	0.607684	4.44764	3.28363e-43	0.444992	0.0208756	0.00331864	0.996505	-1.16081	0.489518	8.00084	1.92743e-139	-1.30197	2.74144e-09	0.498567	0.457417
ENSG00000007516	BAIAP3	-0.476444	0.23615	2.24958	4.18493e-16	-1.02424	7.27585e-42	0.269229	0.327095	-1.78139	0.000183825	0.589963	0.034409	-1.44727	7.1885e-81	-0.452811	0.100577
ENSG00000007520	TSR3	-0.0387141	0.605945	-0.217308	0.00129624	0.294457	0.000421454	-0.0669183	0.344623	0.522824	4.54095e-13	0.334711	2.82294e-07	0.593713	4.96394e-13	-0.0235323	0.734781
ENSG00000007541	PIGQ	0.982097	3.49537e-12	0.631108	7.19527e-06	1.22225	3.45646e-50	0.656294	2.96931e-06	0.730542	2.34399e-07	0.809966	7.61907e-09	0.28325	0.000744714	-0.182845	0.195095
ENSG00000007545	CRAMP1L	0.328138	0.000520779	0.30478	3.81717e-05	-0.263385	0.00281453	0.417075	2.03441e-08	0.453179	9.2965e-07	0.165611	0.0232126	0.0721964	0.397739	-0.00691559	0.926889
ENSG00000007866	TEAD3	-0.193994	0.150906	-0.534065	0.000750827	0.101784	0.154662	0.899413	6.69917e-11	-0.637932	2.48372e-06	-0.130661	0.391153	-0.0464236	0.516909	-0.42545	0.00241261
ENSG00000007923	DNAJC11	0.0583572	0.568046	-0.606699	1.01617e-09	0.0850062	0.167575	-0.218706	0.0278941	0.454963	7.14802e-06	-0.436179	9.9446e-06	0.480128	2.97829e-15	-0.0585642	0.553784
ENSG00000007933	FMO3	0.873794	0.626609	2.57631	0.000203042	X	X	2.58894	0.0846482	0	1	-3.07399	0.000201189	X	X	6.0843	8.5597e-06
ENSG00000007944	MYLIP	0.914604	3.4489e-07	0.295967	0.0992112	0.0332644	0.724028	0.714341	0.000120328	-1.7672	8.38166e-17	2.30261	1.60735e-41	0.300179	0.00110517	0.500442	0.00690586
ENSG00000007968	E2F2	-0.16163	0.356338	-0.0809273	0.630471	2.17793	3.03501e-47	-3.74778	2.0584e-58	0.489679	0.00426795	0.796664	1.26848e-06	1.46282	2.18571e-21	-0.501188	0.00293362
ENSG00000008018	PSMB1	-0.222018	0.109277	-0.716018	3.16456e-07	0.12897	0.0495593	-0.266256	0.0544356	0.256135	0.0641627	0.00287273	0.983517	0.499756	1.9945e-14	0.210077	0.128241
ENSG00000008056	SYN1	0	1	0.862377	0.350879	0.276903	0.473081	-1.51052	0.356557	2.25613	0.18119	0.274186	0.767725	0.328334	0.388278	-2.75073	0.0931691
ENSG00000008083	JARID2	0.0967881	0.287453	0.161335	0.0949152	0.108142	0.266076	0.0338208	0.72013	0.0638163	0.482428	1.07532	1.07893e-30	0.166107	0.0848095	-0.124996	0.183684
ENSG00000008086	CDKL5	0.60704	0.0434139	0.3378	0.266738	0.837703	6.36842e-15	0.156884	0.610394	-0.52076	0.0950781	0.97662	0.000979849	-0.480822	3.04672e-05	1.25383	2.23062e-05
ENSG00000008128	CDK11A	-0.607468	0.00913936	0.977156	2.87198e-06	-0.102391	0.499992	0.928718	1.5153e-06	0.270447	0.202837	0.439843	0.0381073	-0.629152	6.3494e-05	-0.598964	0.00491071
ENSG00000008130	NADK	0.268592	0.00418711	0.459783	5.63445e-07	-0.0601298	0.399215	0.527645	5.81328e-09	0.317689	0.000682995	0.261824	0.0043316	0.2405	0.000690216	-0.364077	6.62464e-05
ENSG00000008226	DLEC1	-0.539948	0.422001	2.37387	0.0125008	-1.05956	0.020676	0.955528	0.162461	-2.88318	0.00186502	-0.431968	0.721708	-2.84463	1.06324e-06	0.597975	0.384424
ENSG00000008256	CYTH3	0.488485	3.7958e-08	0.386241	9.41386e-05	-0.532407	3.06379e-12	0.335146	0.000991456	-0.0196102	0.825596	2.15847	1.11222e-114	-0.486172	1.69308e-10	1.52258	4.08023e-55
ENSG00000008277	ADAM22	0.733599	1.31992e-11	0.173591	0.108762	0.37531	1.21152e-05	-0.849887	1.15312e-06	-0.384012	0.000552449	1.16068	5.97581e-28	0.75025	1.09006e-18	0.699638	8.9175e-07
ENSG00000008282	SYPL1	-0.318231	0.00899768	-0.671883	3.39157e-08	-0.448392	1.15233e-06	-0.645403	9.61857e-08	0.19453	0.108342	-0.317659	0.00859049	0.289346	0.00155719	-0.480295	6.7367e-05
ENSG00000008283	CYB561	1.18551	1.41031e-33	0.386257	3.43812e-06	0.297008	2.6445e-05	0.277966	0.000701543	0.399475	7.6931e-05	0.228976	0.00582704	-0.218942	0.00218944	-0.371285	6.53993e-06
ENSG00000008294	SPAG9	0.830282	1.25761e-27	-0.312684	7.38012e-05	0.0522567	0.505693	0.215053	0.005187	0.423818	2.85871e-08	-0.0526015	0.500333	-0.180787	0.0213324	0.7473	1.32989e-22
ENSG00000008300	CELSR3	0.00215923	0.987701	1.24228	3.93312e-19	-0.0083259	0.936395	1.07624	5.5776e-12	-0.416498	0.00303049	0.573797	3.76775e-05	-0.612579	7.67204e-09	0.127093	0.427976
ENSG00000008311	AASS	0.315866	0.0880903	0.159555	0.550344	0.166995	0.571316	-0.197757	0.267458	-1.46955	3.36916e-13	3.75951	1.89651e-63	-4.48227	4.40904e-12	0.58266	0.000840411
ENSG00000008323	PLEKHG6	1.57765	0.000193709	1.71805	7.62363e-07	2.63093	1.18117e-11	1.80832	1.59808e-08	-0.146617	0.754217	-3.53037	1.48968e-10	-0.155297	0.740891	0.371494	0.249139
ENSG00000008324	SS18L2	-0.397669	0.000473561	-0.582993	1.09651e-09	0.537686	1.22275e-06	-0.376985	0.00339323	0.0577911	0.589834	-0.344859	0.000151318	0.581611	1.22801e-07	-0.73353	1.7588e-08
ENSG00000008382	MPND	0.255901	0.0831838	-0.0952689	0.519712	0.589004	4.9779e-08	0.178904	0.295104	-0.831206	4.79435e-08	-0.107463	0.46423	0.534106	7.15721e-07	0.333754	0.0450809
ENSG00000008394	MGST1	0	1	-0.968968	0.000182315	0.455336	1.01221e-07	0.356653	0.164214	2.24023	0.12628	-6.13189	1.94515e-76	0.363971	2.06245e-05	1.05768	3.59651e-05
ENSG00000008405	CRY1	-0.704648	7.47362e-09	-0.787792	8.56769e-10	-1.01787	2.15883e-31	-0.755645	3.91398e-09	-0.09878	0.413438	-0.428583	0.000649664	-0.0755038	0.37235	0.0485121	0.696509
ENSG00000008441	NFIX	-0.0198743	0.848486	1.51537	2.01299e-48	-0.0926217	0.25197	-0.274446	0.0163435	-0.173968	0.0945515	-1.42485	3.63197e-41	0.00741232	0.926845	-1.09118	1.54331e-20
ENSG00000008513	ST3GAL1	-1.3644	8.19735e-07	0.0885493	0.845523	-2.19006	1.78447e-09	-0.51464	0.0478701	0.459617	0.0859906	-4.91835	6.61644e-05	-4.08503	1.63696e-16	-0.805115	0.00196711
ENSG00000008516	MMP25	0.734428	0.458844	1.41867	0.0375011	0.358576	0.25855	3.38349	1.32574e-06	1.28268	0.169978	-0.337348	0.670606	-0.787856	0.0231577	1.65729	0.0257015
ENSG00000008517	IL32	5.58431	1.621e-31	3.14537	3.35627e-10	5.54929	1.42811e-119	4.83816	5.71926e-117	9.18276	1.94384e-83	-2.48539	0.0271287	1.1682	1.84854e-05	4.3948	9.37746e-97
ENSG00000008710	PKD1	-0.0885812	0.430263	1.23998	6.55335e-28	-0.648721	8.61018e-21	0.573255	6.22627e-07	-0.490988	1.29699e-05	0.816492	5.82771e-13	-0.416942	1.64966e-09	0.55831	1.1105e-06
ENSG00000008735	MAPK8IP2	0.663053	0.0179924	1.57199	2.36583e-06	1.74116	1.92275e-70	1.67707	1.79927e-06	-0.0468959	0.868017	0.381712	0.27117	-0.782603	3.1521e-12	1.97297	1.01176e-08
ENSG00000008838	MED24	-0.306505	3.06455e-05	-0.12673	0.0847833	-0.3016	6.43254e-06	0.427227	3.86702e-09	-0.443665	1.62936e-09	0.131792	0.0705023	-0.124322	0.0612405	0.467469	9.99146e-11
[truncated: 23,690 more rows]

## Sheet: Table 4-GSEA (1W, Res)
	MIA PaCa-2 (ERKi 1W vs. DMSO (1:1,000))					SW620 (ERKi 1W vs. DMSO (1:1,000))					SW1573 (ERKi 1W vs. DMSO (1:1,000))					MIA PaCa-2 (Resistant vs. DMSO (1:1,000))					SW620 Resistant vs. DMSO (1:1,000))					SW1573 (Resistant vs. DMSO (1:1,000))					CFPAC-1 (Resistant vs. DMSO (1:1,000))
[truncated: 4,329 more rows]

[truncated: 6 more sheets: Table 5-Drug screen, Table 6-RNA-seq data (serial), Table 7-GSEA (serial), Table 8-DPGP Clusters, Table 9-LOF screen gene select., Table 10-LOF screen results]
